# Supplementary material for: Analysis of meiosis in Pristionchus pacificus reveals plasticity in homolog pairing and synapsis in the nematode lineage
Source: eLife. 2021 Aug 24;10:e70990. doi: 10.7554/eLife.70990 (PMC8455136; doi:10.7554/eLife.70990)
Supplement: Figure 2—source data 1. [file elife-70990-fig2-data1.xlsx]

## Sheet: WT Chr X
zone 1	zone 2	zone 3	zone 4	zone 5
2.4	3.7	0.6	0.6	0.9
2.6	2	0.6	0.4	0.7
2.6	2.1	0.5	0.8	1.3
3.8	2.9	0.6	0.4	0.8
1.7	3.6	0.4	0.5	1.1
3.6	0.5	0.7	0.9	1
1.1	2.6	0.4	0.8	0.8
2.6	2.6	0.5	0.5	0.8
4	2.7	0.5	0.5	1.2
1.5	2.1	0.6	0.4	0.9
3.6	1.3	0.4	0.4	0
2.7	3.1	0.6	0.5	0.7
3.5	3	0.5	0.4	1.1
1	3.3	0.6	0.5	0.6
3	3	0.7	0.7	1.4
3.5	3.4	0.5	0.6	0
2.1	2.9	0.9	1	1
2.9	1.6	0.5	1.2	0.9
2.7	1.1	0.6	0.5	0.9
3.3	3.1	0.5	0.6	1.3
2.3	1.8	0.4	0.5	1.1
2.3	3	0.8	0.5	1.1
4.1	2.7	0.6	0.8	1.7
0	0.6	0.4	0.5	1
2.7	0.4	0.5	0.4	0
2.3	1	0.4	0.3	0.8
2	0.5	0.3	0.5	2.1
2.8	0.6	0.8	0.4	0.6
2.9	0.6	0.8	0.4	0.6
3.2	0.8	0	0.6	1.1
1.2	0.6	0.5	0.4	0.6
3.1	1	0.8	0.1	1
1	0.9	0.3	0	0.9
2.2	1.5	0.8	0.3	0.9
3.2	0.6	0.9	0.2	2.6
4.5	0.6	1	0.5	1.5
1.4	0.6	0.6	0.9	1.3
1.9	0	0.6	2.5	1.2
2.5	0.6	0	0.9	0.9
3.6	0.6	1	1.2	1.2
4	0.9	0.5	0	1.4
1.8	0	0.7	0.5	0.9
1.2	0	1	0
0.9	0.3	0.9	0.7
2.4	0	1	0.4
2.5	0	0.3	0.5
2.4	0.6	0.7	0
2.4	0	0.4	1.3
2.2	0.6	0.8	0.9
2.6	1	0.4	0.4
1.5	0.7	0.2	0.9
1.2	0.3	1	0.8
0.7	0	0.4	0.6
0.9	3	1	0.4
2.7	5.1	0.7	0.8
2.3	0.9	1.1	0.6
2.2	2.3	0.2	1.2
3.5	2.1	0.3	0.6
2.9	0.4	0.7	0.4
2	0.4	0.7	0.4
1.7	0.6	0.4	1.5
1.8	1.6	0.4	0.7
1.9	0.4	0.3	0.3
3.2	0.2	0.6	1
4.3	0.5	0.6	0.7
2.9	0.9	0.7	0.9
0.7	0.6	0.2	0.2
0.6	0.6	0.8	1
2.7	0.7	0.5	0.6
	0.2	0.4	1.3
	0.4	0.6	0.8
	0.6	0.6	0.8
	0.6	0.5	0.6
	0.6	0.7	0.5
	0.3	0.1	1.8
	0.5	0.3	0.6
	0.4	0.9	1.4
	0.6	1.3	1.7
	0.2	0.9	1.1
	0.4	0.7	1.1
	0.6	1.5	0.6
	0.7	0.6	1.1
	0.4	1.1	2.1
	0.5	0.6	1.4
	0.6	0.9	0.8
	0.4		0.8
	0.5
	0.7

## Sheet: WT Chr IV
zone 1	zone 2	zone 3	zone 4	zone 5
2	2.6	0.7	0.3	1.2
1	3.7	1	0.5	0.4
2.1	1.4	0	0.4	0.6
3.9	2.8	0.6	0.6	1.4
3.7	2	0.6	1.2	0.7
2.3	2.3	0.4	0.4	1.4
2.3	2.3	0.4	0.6	1.4
3.3	3.2	0.2	0.6	1.4
3.7	2.4	0.4	0.3	1.5
2.8	1.9	0.6	0.5	1.3
1.4	2	1	1	0.9
3.2	1.8	0.3	0.6	1.2
3.8	1.3	0.1	0.6	0.9
1.3	2.2	0.4	0.5	1.5
1.4	1.9	0.4	0.5	1.3
3	3.7	0.3	0.8	1.5
2.6	3.2	0.4	0.5	1
2.6	3.1	0.6	0.4	1
0.8	1.9	0.3	0.4	2
3	1.7	0.2	0.6	1.9
2.8	3.4	0.8	1.1	0.9
2.9	1.7	0.5	1.8	0.7
2.5	2	0.7	0.9	2.3
2	0.4	0.5	0.3	1.4
2.5	0.4	0.6	0.5	1.3
3.4	0.8	0.8	1	1.3
2.9	0.7	0.8	0.9	1.7
2.9	3	0.6	1.5	1
1.4	0.5	1	0.6	0.9
1.9	0.8	1.1	0	0.9
1.8	0.8	0	0.5	0.7
2.7	0	1.3	0.9	0
1.6	0.7	1	1.1	1.8
3.5	0.1	0.8	0.6	2.1
2.9	0.9	0.5	1.3	2.2
2.6	1	0.6	1.7	0.8
4.5	0.8	1.4	0	1.2
2.2	0.7	0	0.4	0.9
2.1	0	0	0.9	2
1.1	0	0.9	0.1	1.3
3.2	0.5	0.1	1.8	1.6
3	0.4	0.5	1.7	2.5
3.6	0	0.1	1.8	1.6
3.6	0.1	1.2	0.7	1
2.1	0.7	1.4	1.5	1.2
3.4	0.6	1.2	1.1
4.5	0	0.9	0.4
2.4	0.1	0.7	1.7
3.2	0.1	0.9	1
3.4	0	0.8	1
3.4	0.6	0.9	0.8
2.5	0.7	0.7	1.6
2.4	0.6	1.7	1.1
0.7	0	0.5	1.2
2.5	0	2.3	0.6
2.7	4	0.1	0.9
1.9	4.4	0	1.7
2.1	2.9	0.6	0.6
3.1	0.4	0.6	1.4
2.4	2.7	0.5	0.8
2.9	2.4	0.4	1
2.1	0.6	0.4	0.6
1.6	0.9	0.6	0.8
1.8	1.4	0.5	0.9
2.5	0.6	0.6	0.9
2.8	0.4	0.7	0.6
2.7	0.2	0.5	0.3
3.3	0.5	0.3	0.5
2.1	0.4	1	0.7
1.2	0.4	0.5	2.1
2.6	0.4	0.5	0.6
2.2	0.6	0.3	1
2.4	0.5	0.4	1.1
2.9	0.4	0.4	1.4
1.7	0.5	0.5	1.9
	0.2	0.2	1.3
	0.4	0.7	0.8
	1.1	1	1.5
	0.2	1.3	2.7
	0.5	1.2	1
	0.8	0.7	1.5
	0.4	0.8	1.2
	0.5	1.4	1.2
	0.6	2.4	1.7
	0.5	2.1	1.5
	0.3	1.1	0.9
	0.4	0.4	0.9
	0.4	0.4
	0.3	0.2
	0.6
	0.4

## Sheet: spo-11 Chr X
zone 1	zone 2	zone 3	zone 4	zone 5
1.6	3.4	0.6	0.6	1
0.5	1.5	0.5	1	2.2
2.8	2.8	0.4	0.5	1
2.9	1.7	0.6	0.5	0.8
2.2	2	0.4	0.7	1.1
3.9	0.7	0.3	1.3	2.3
3.5	0.9	0.7	0.7	0.7
1.9	0.8	0.8	0.6	3.4
3.9	0.3	0.6	0.8	4.8
2.1	3.1	0.3	0.5	4
3.3	1.2	0.7	0.8	3.3
3.3	0.6	0.2	1.1	5.9
2.8	0.8	0.2	2.9	0.2
2	0.7	1.1	0.5	0.6
2.8	0.3	1.2	1.4	0.9
2.1	0.6	0.8	1.3	0.6
2.6	0.2	0.4	2.7	0.6
0.5	0.7	0.2	0.8	0.3
3.4	0.6	0.4	1	1.1
3	1.1	1.4	1.6	1
2.2	0.8	0.9	0	0
1.4	1.3	1.6	0.3	1
3.1	0.9	0.7	1.1	4.4
2.2	0.4	0.7	0	4.8
3.2	0.7	0.3	0.5	0.6
2.7	0.3	0.6	0	4
2.2	0.6	0.7	0.5	1.6
1.9	2	0.4	0.4	3.5
2.2	2.1	0.6	0	3.5
2.1	0	0.6	0.6	2.4
1.5	2.5	0.4	0.8	1.3
2.5	2.2	1.7	0
1.6	0	0.5	0.1
0.6	0.6	0.6	0.6
2.3	2.7	0.2	0
3.8	0.6	1.3	3.1
2.8	1.3	0.6	0.2
2	0.9	2.1	4.3
1.8	0.9	0.7	4.4
3	3.3	0.8	0.2
0.4	0.5	2	2
2.5	3.7	1.5	1
2.7	1.1	0	1.2
0.9	0	1.6	1.4
3.5	0	0	0.7
1.5	0.6	0	1.3
2.3	1.3	3.3	1.5
1	0.4	0	1.5
0.2	2.3	3.5	2
1.2	1.1	0.9	4.2
2.4	3.4	0	2.5
1.2	2.3	0.9	0.5
1.7	1.4	1.9	1.3
0.8	0.7	0	1.6
0.9	0.5	0.8	3
0.4	3	0	1.1
3.2	0.7	0.6
2.4	2.3	0.4
	0.6	1.2
	0.2	0.4
	0.8	3.6
	2.1	0.8
	0.5	0.7
	0.4	0.5
	0.3	1
	2.3	0.7
	1.2	0.6
	0.7	1
	0.6	0.1
	0.9	0.4
	0.1	0.8
	0.1	2.4
	0.5	2.6
	0.9	0.7
	0.8	0.9
	0.8	0
	2.2	1.1
	1.2	0.2
	0.4	2
		1
		1.1
		0.2
		0.1
		1.5
		2
		0.8
		0.2
		2.8
		3.4
		3.7
		0.8
		3.6
		3.6
		2.6
		4.1
		0.6
		0.4
		2.6

## Sheet: spo-11 Chr IV
zone 1	zone 2	zone 3	zone 4	zone 5
1.1	2.5	0.5	0.9	2.7
1.2	2.7	0.6	0.1	2.3
0.6	1.3	2.6	1	1.3
2.5	2.5	0.5	2.8	2.6
1.4	1.7	0.6	2.9	2
2	0.7	3.5	3.4	4
3.3	1.9	0.7	0.8	2.9
2.8	2.2	1.3	0.7	3.4
1.5	0.9	0.7	0.8	4.2
3	1	0.9	0.7	5
3.1	2.2	1	2.1	2
2.4	3.1	1.2	1.1	4.5
3.4	1	0.6	2.9	5.3
2.3	0.6	0.4	2.2	6.1
1.1	0.9	0.5	2.5	7
2.9	0.7	1	1.9	4.8
2.5	1.6	1.2	2.1	2.4
2.5	3.3	0.7	1.2	2.1
2.3	1.3	0.4	2.4	1.2
2.4	3.4	0.4	3.6	0.6
1.6	1.1	0.6	2.7	1.3
2.8	3.6	3.8	2.7	1.3
2.2	0.8	0.7	0	1.7
1	0.8	3.8	0.7	4
2.2	0.4	1.1	1	0.9
1.4	0.8	0.7	1	0.9
2	0.9	0.4	0.5	1.8
2	0.9	0.4	2.9	3.7
3	0.6	0.6	0.5	3.2
0.4	0.9	1	3.6	1.8
2	0.8	0.4	0	2.7
2.7	0.4	0.4	2.4	3.4
2.9	2	0.6	2.8	1.9
2.2	3	1	1	2.9
1.7	1.8	0.8	0.5	1.1
3.1	2.3	1.2	0.1	2.7
4	1.7	0.8	1	2.8
2.2	0.2	0.8	0.8	3.3
3.1	0.5	2.1	0.4	5
1.4	1.1	0.5	0.8	3.3
0.8	2.5	0.9	0.7	2.9
2.5	2	1	2.2	5.5
2.8	0.8	2.7	0.9	2.3
2.3	2.7	0.5	1.5	5.5
1.5	1.5	1.9	0.1	3.1
2.5	0.9	1.4	4.3	2.2
2	2.7	2.3	3.3	3.5
2.6	4	3.1	2.3	4.4
1.4	0.8	1	3	7
1.6	2	3	3.4	3
1.6	1	1.8	1.2
2.1	2.4	2.8	3.5
0.8	2.9	0.6	3.3
1.9	0.9	1.3	0.9
3	0.9	0.8	1.3
0.8	2.5	1.2	1.4
2	3.2	2.5	3.9
2	0.8	2.6	1.7
3.5	0.2	3.4	3.2
0.7	3.1	2.1	3.3
0.7	1.9	1.7	5.3
2.5	1.1	0	5.2
1.2	4	1.3	4.7
0.7	0.5	0.2	3.6
1	3.1	0.1	3.9
1.3	0.5	0.7	1.3
3.4	2.9	0.1	4.8
2.7	3.4	2.5	1.9
3.5	2.9	1.6	3.3
	0.8	0.9	4.2
	1.3	0.8
	0.9	1.3
	0.7	0.7
	0.5	2.4
	0.2	3.3
	0.8	2.1
	1.4	1.3
	2.6	3
	0.7	1.6
	3.6	3.9
	1.3	3.6
	0.7	2.5
	0.5	1.9
	0.5	0.7
	1.8	2.8
	1.7	3.3
	2.6	1.8
	1	3.6
	0.4	1.4
	1.1	3
	2.4	2.9
	1.6	2.6
	1.9	0.9
	2.6	1.4
	1.6	3.1
		0.6
		2.8
		3.2
		1.2
		3.2
		2.9
		3.6
		1
		3
		3.3

## Sheet: dmc-1 Chr X
zone 1	zone 2	zone 3	zone 4	zone 5
2.1	1.2	0.8	4.4	2.6
3.1	0.7	2.1	1.1	3.7
2.8	2.1	2.1	3.5	1.1
3.5	0.6	1.1	3.6	4
2.9	1.6	3	3.5	1.1
3.2	0.4	1.1	0.6	5.2
3.1	0.7	1.2	0.4	1.8
2.4	1.8	2.6	2.4	2.3
2.8	1.6	0.8	1.3	3.3
3.6	0.6	2.8	1.8	3.4
2.1	1.2	0.4	2.4	1.1
1.3	0.8	2.5	2.5	4.1
1.6	0.5	2.3	3	2.5
4	1	1.5	3.1	3.5
3.3	0.7	1	3.2	0.2
2.7	0.5	0.8	1.8	1.8
1.8	0.8	1.6	2.2	2.8
3	0.7	3.5	3.1	0.2
3.1	2.8	2.7	4.6	0.2
3.5	0.9	2.1	2.1	2
4	0.8	2.9	2.5	3.7
1.8	1.1	0.9	1.3	4.5
1.1	2.5	2.5	1.8	1.4
1.6	2.1	1	3.3	1.9
2	1.2	0.7	0	2.9
0.8	1.1	0.8	1.8	3.2
0.9	0.8	3.5	1.7	2.3
1.2	0.7	3	0	3.6
0	0.2	2	4.9	4
3.3	2.8	0.9	0.2	2.5
2.5	2	2	3.5	1.8
0.1	1.1	0.4	0.1	1
0	0.6	1.7	0	1.8
2.5	1.7	1.1	3	0.5
3.2	1.1	0	0	3.1
3.2	0.9	0.8	0.7	1.2
1.5	0.7	0.7	1.6	3.3
2.8	1.7	2.9	3.1	1.4
2.1	1.4	0	2.3	2.6
0.7	2.3	1.2	0.8	5.5
1.6	2.2	1	3.3	1.7
0.7	1.9	1.3	1	4
1.6	1.7	1.2	4	0.8
1.3	1.7	0.5	1	1.7
1.2	1.3	0.5	0.9	2.6
1.8	2.8	0.8	1.4	2.6
2.2	2.5	0.7	1.3	2.6
1.3	0	0.4	1.2
5	1.2	3.5	1.8
2.5	0.1	1	1
2.5	0.9	1.2	2.1
2.2	0	0.6	0.6
1.8	0.7	1.1	2.5
2.2	0	0.4	1
0.7	1.3	0.8	2.3
1.1	0.4	0.9	1.1
2.7	0.6	0.6	2.7
2.8	1.2	1.9	3.1
2.7	1.2	1.5	3.7
2.5	1.1	2.3	0.4
2.4	0.7	1.1
2.9	1.3	2.4
1.6	1	1.1
1.8	1.4	0.9
0.8	1.8	1
3.1	2.9	0.2
1.9	1.6	0.7
2.5	1.5	1.4
1.3	0.4	0.5
1.5	1.7	2.6
0.8	0.8	0.3
2.3	0.7	1.2
	0.2	2.8
	0.8	1.2
	0.6	1
	0.7	1.4
	0.5
	1.5
	0.4
	1.9
	1.4
	0.4
	2.2
	1.4
	0.6
	0.7

## Sheet: dmc-1 Chr IV
zone 1	zone 2	zone 3	zone 4	zone 5
1.3	2.2	3.6	2.7	2.4
2.3	2.7	2.8	2.2	1.2
2.5	0.9	3.5	2.6	3.6
3.6	0.9	2.7	2.8	3.9
3.3	1.1	0.5	2.4	3.3
2.6	1.6	2.5	1.7	3.4
2.8	1.9	3.1	1.4	2.2
2.9	0.7	2.9	4.4	2.7
1.7	1	2.2	2.9	1.4
0.7	0.8	4.2	1.6	1.3
1.2	1	3.3	3.9	5
2.6	2.1	2.8	1.5	1.7
2.6	3.3	4	4.1	4.5
1.7	2.4	2.6	3.5	4.9
3.6	2.6	2.2	4	4
4.2	2.1	3.5	1.4	3.2
3.7	0.6	3.3	3.4	1.4
0.7	1.9	2.2	2.7	4.1
3.5	3.1	2	4.3	3.4
2	1.2	2.8	3.9	2.7
2.7	2.1	1.2	1.8	4
1.8	2.5	2.7	2.9	0
1.3	3.1	1.8	2.2	4.6
3	3.4	3.1	1.4	2.7
3	2.1	1.1	2.2	1.9
3.2	3.1	2	2	1.3
3	1.8	2.7	2.6	0.6
1.3	1.6	3.5	3.2	4.4
1.3	2	3.4	3	3.4
1.2	2.4	1.9	3.3	2.9
0.5	4	2	2.7	1.8
2.2	2.1	3.3	2.7	1.9
0.6	0.9	2.7	1	2.5
4.8	2.1	2.9	2.7	3.3
2.3	1.1	1.4	3.6	1.7
2.5	3.2	2.5	4.8	1.5
4.1	2.4	1.3	2.8	3.5
1.4	2	1.3	4.6	2.5
1	2.4	0.9	1.7	1.7
2.5	2.5	0.5	2.9	1.4
2.8	3	2.3	3.5	3.8
3	2.1	2	3.9	4.4
2.7	1.3	3.5	0.2	1.5
2.8	2.6	1.5	0	3.6
3	2.5	2.9	3	3.2
2.5	3.3	2.4	0.5	2.7
0.7	2.6	0.9	1.2	3.5
2.4	1.8	1.5	3.3	1
3	1.6	1.1	1	3
2.6	0.6	4	3.3	3.7
1.8	2.6	2.2	1.2
2.6	0.8	1.5	2.6
2.9	1.8	3	2.1
2.5	2.9	2.8	1.2
3	0.9	3	2.3
3.3	0.6	3.3	1.7
4.3	1.1	2.3	0.7
4	0.9	0.7	3
4.2	0.6	2.2	3.5
4	1	1.7	0.9
1.2	0	3.2	1.9
3.5	0	0.5	1.5
1	0.9	2.8	1.6
3.6	1.1	0.3	2.9
2.4	1	1.3	2
3.2	0.8	3.1	1.6
2.4	0.7	2.8	2.9
2.6	2.7	3	2
2.6	1.9	1.4	1.4
1.6	1.2	3.8	4.1
2.7	1.4	1	1.6
2.3	2.7	0.6	3.4
2	0.8	2.1	1.5
3.8	3	2.8	3.3
3.1	1.5	1.5	2.1
2.5	2.2	2.1
3.2	0.7	3.8
2	0.6	1.8
1.7	0.6	2
3.1	1.1	1.4
1.7	0.9	2.8
	0.6	1
	1.2	2.6
	1.5	2.2
	0.6	1.1
	1	1.4
	0.7	2.6
	0.7	1.4
	1.7	2.8
	0.9	3.3
	1.4	2.7
	1	0.7
	1.4	3.6
	1
	1.4
	1
	1.8
	1.6
	1.2
	0.9
	0.9
	0.8
	1.9
	0.6
	1.3
	2.8
	1.5

## Sheet: rad-51 Chr X
zone 1	zone 2	zone 3	zone 4	zone 5
1.4	3.4	2.8	0.6	0.7
3.2	1.5	2.4	0.3	0.7
2	1.1	2.1	0.5	0.4
3.3	1.1	0.6	0.6	0.4
1.3	2.1	1.3	0.1	0.3
3.1	3.9	0.3	0.5	0.8
1.6	0.8	2.2	0.6	0.6
2.4	4	0.9	0.5	0.4
2.6	2.5	0.6	0.4	1.5
1.3	3.5	0.8	0.6	0.6
4	1.5	0.5	0.5	0.5
2.4	2.6	0.2	0.6	0.5
4.1	2.1	0.6	0.5	0.5
3.3	1.7	0.6	0.4	0.5
2.4	1.3	0.9	0.2	0.5
1.2	1.7	0.8	0.8	0.7
2.7	2.7	0.6	0.5	0.7
1.9	0.9	0.2	0.6	0.9
4.3	2.7	0.6	1.7	1
2.8	2.6	0.2	0.3	0.7
4.3	3.6	0.4	1.1	1.1
1.8	1.3	0.4	0.7	0.8
2.2	2.9	0.4	1	0.9
0.8	2.3	0.4	0.7	1.5
0.9	2	0.2	0.8	2.1
3	2	0.3	0.7	0.5
2.8	3.3	0.5	1	0.6
3.3	2.6	0.7	1.3	1.1
1.4	3.2	0.7	0.6	1.1
3	0.6	0.7	0.5	1.1
2.5	3.1	0.5	1.3	1.2
1.1	0.2	0.6	0.7	1.2
2.9	2.8	0.2	0.4	2
3.5	4	0.4	1.1
3.5	1.6	0.7	0.7
1.6	1.2	0.8	0.6
1.5	3.4	0.4	0.6
3	2.3	0.6	0.5
2.8	1.4	0.6	1.3
1	0.9	0.7	0.6
3	2	0.5	0.5
3.3	3.2	0.3	0.7
3	1.4	0.4	0.8
	1.4	0.3	1.4
	2	0.6	0.9
	1.2	0.5	1.6
	3.4	0.1	0.5
	1.9	0.7	0.9
	0.4	0.2	1.6
	0.9	0.6	0.5
	0.4	0.3	0.7
	0.6	0.7	1.4
	0.6	0.6	1.1
	0.5	0.7	0.7
	1	0.4	2.2
	0.9	0.6	0.5
	0.7	0.7
	0.3	0.5
	0.6	0.6
	0.6	0.4
	0.5	0.4
	0.5
	0.5
	0.4

## Sheet: rad-51 Chr IV
zone 1	zone 2	zone 3	zone 4	zone 5
3	2.1	3	0.6	0.5
1.9	2.4	3.3	0.4	0.5
3.5	1.9	0.4	0.2	0.7
2.2	3	0.1	0.3	1.2
2.5	1	2.4	0.2	1.3
1.9	1.6	0.6	0.4	1
2	2.6	0.2	0.1	0.6
2.9	2.6	0.9	0.9	1
2.9	2.4	0.3	0.5	0.6
3	2.8	0.5	0.6	1.7
2.8	2.4	0.9	0.7	0.9
1.2	1.9	1	0.6	0.7
4.3	1.8	0.7	0.6	2.7
3	2.2	0.1	1	1.1
5	2.3	0.6	1.9	0.9
2.5	2.2	2.8	1.1	0.5
3.8	1.5	0.2	2.2	0.1
4.6	3.3	0.4	0.3	0.8
2.4	2.7	0.5	0.5	1.6
2.1	3.1	0.4	1.5	0.7
3.5	2.5	0.7	0.7	1
2.4	1.7	0.4	1	0.5
1.5	3.2	0.6	1.4	0.4
3.3	2.2	0.4	1.2	0.8
2.6	3.2	0.7	0.4	1.9
3.3	3.8	0.8	1.3	1.1
3.8	4	0.5	0.6	1
4	2.6	0.4	0.8	0.3
2.5	3.6	0.1	0.8	1.7
4.5	3.5	0.4	0.4	1
4	3	0.9	0.6	0.7
4	3	0.8	0.6	0.7
0.8	2.4	0.6	0.6	0.7
1.9	3.7	0.9	0.9	1.3
2.8	4.3	0.9	1.6	1.1
3.1	3.9	1	1.2	1.6
2.1	2.7	0.7	1.2
2.2	1.7	0.4	1.3
3.3	0.8	0.8	1.3
2.2	0.5	0.2	0.4
1.8	2.3	0.4	1.3
4	3.3	0.4	0.6
1.3	4.1	1.1	1.2
3	2.3	0.5	1.3
2.5	4.1	0.6	1.8
3.2	1.5	0.8	1.5
2.5	3.2	0.8	0.7
1.5	2.5	0.4	0.8
2.3	3.5	0.4	1.4
2.7	2.2	0.6	0.8
1.8	2	0.5	0.7
	3.1	0.6	1.5
	3.6	0.2	0.9
	0.6	0.3
	0.9	0.4
	1.9	0.9
	0.5	0.5
	0.5	0.4
	0.3	0.4
	0.8	0.5
	0.6	0.3
	0.3	0.5
	0.6	0.4
	0.5	0.4
	0.4
	0.4
	0.2
	0.5
	0.4
	0.8
	0.4
	0.8
	0.4

## Sheet: heterologous vs. homologous
WT PM heterologous	WT TZ heterologous	WT TZ homologous	spo-11 PM heterologous	spo-11 TZ heterologous	spo-11 TZ homologous	dmc-1 PM heterologous	dmc-1 TZ heterologous	dmc-1 TZ homologous
1.6	4.3	1.6	1.9	0.9	0.5	2.7	1	0.6
2	0.6	3.2	1.3	1	1.1	1	0.9	0.6
3.2	0.5	1.6	3.3	0.4	2.5	3.8	0.6	1.1
2.9	1.7	1.3	3.9	2.5	2	2.3	0.6	0.9
1.9	1.4	1	1.9	0.5	0.8	2.3	1	0.6
0.7	1	2	3.3	2.5	2.7	3.1	0.7	1.2
3.5	2.3	0.2	1.3	1.2	1.5	2.2	1.2	1.5
2.1	1.1	0.7	1.7	1.1	0.9	2.7	1.1	0.6
2.9	0.9	1	2.3	2.5	2.7	2.6	1	1
2.3	0.5	0.2	2.6	1.7	4	1.1	1.2	0.7
3.3	0.7	0.4	1.6	0.5	0.8	3.6	0.8	0.7
2.7	1.8	0.2	2.3	0.8	2	1.1	1.6	1.7
0.9	1.5	0.4	3.5	1	1	1.1	1	0.9
1.8	1.6	0	2.5	1	2.4	1.5	0.3	1.4
2.6	0.9	0	2.7	2.1	2.9	2.3	0.5	1
3.8	4.2	1	2.7	0.4	0.9	1.7	1	1.4
3.7	0.6	1.8	1.7	0.8	0.9	2.6	0.5	1
2.7	1.4	3.1	1.1	3	0	2.3	1.6	1.4
3.4	3.5	1.5	2.5	2.8	0.6	3.1	0.4	1
2.9	1	1	1.8	1.9	2.7	1.7	0.9	1.8
1.9	2.7	2.6	2.5	1.9	0.6	2.1	1.2	1.6
2.1	3.6	0.6	2.7	1.8	1.3	1	0.8	1.2
2.1	1.2	0.5	2.6	1.3	0.9	2.6	2.4	0.9
1.2	2.6	1.2	1.3	1	0.9	2.5	1.2	0.9
1.4	0.6	0.6	3.2	3.5	3.3	2.3	1.1	0.8
2.1	1.4	1	3.2	2.8	0.5	0.7	1.2	1.9
1.2	1.4	0.5	2.7	3.1	3.7	3.5	1.8	0.6
3.3	1.4	0.7	1.1	2.4	1.1	2.4	0.6	1.3
1.5	0.4	0.9	3.1	1	0	3.8	2.9	2.8
3	0.7	0.3	1.3	1.7	0	1.5	1.8	1.5
1.5	0.6	3	2.9	0.8	0.6	1.9	0.6	1.5
1.9	1.2	3.6	2.9	2.7	0.7	3.1	1.5	0.4
2	0.6	3	2.3	2.5	1	4.6	1	1.7
2.2	1	0.5	2.6	0.8	1.3	1.5	1.2	0.8
2.2	1.9	0.8	1.2	1.4	3.4	3.2	1.6	0.7
2.5	1.2	0.8	2.6	0.4	2.7	1.2	0.6	0.2
2.2	1.2	0	1.1	2.2	3.5	3.2	1.4	0.8
1.8	0.9	0.7	1.9	1.1	2.5	2.3	0.7	0.6
3.2	2.5	0.1	1.6	2.5	3.2	1.9	0.8	0.7
1.2	4.9	0.9	2.5	3	0.8	2.4	0.7	0.5
2.7	3.7	1	3	1.7	0.2	3.6	1.7	1.5
2.4	1.9	0.8	3.4	1	3.1	2.1	1.3	0.4
3	1.4	0.7	1.8	0.7	1.9	2.5	2.5	1.9
1.5	1.4	0	3.1	1.7	1.1	1.8	1.6	1.4
2.1	1	0	1.8	0.9	4	2.8	0	0.4
1.3	1.4	0.5	3.2	0.2	0.5	2.3	1	2.2
2.3	0.6	0.4	3	0.8	3.1	2.6	1	1.4
2.2	2.2	1.2	2.5	0.6	0.5	2	1.2	0.6
1.2	1	0.9	1.5	1.1	2.9	2.2	2.1	0.7
2.3	1.3	0.6	2	0.6	3.4	2.7	1.9	1.1
3.7	3.7	0.6	2.2	0.7	2.9	3.2	1.7	0.9
2.5	1.2	0.8	2.4	0.8	0.8	1.8	1.4	0.6
1	0.8	0.6	2	0.9	1.3	2.1	2.8	1
0.9	1.4	1	3.1	1.4	0.9	1.1	1.1	0
1.3	0.6	0.9	4	2.8	0.7	2.3	1	0
1.1	0.9	1.5	2.9	0.7	0.5	2.2	1.5	0.9
3.7	3	0.6	2.5	0.3	0.2	2.5	2.1	1.1
3.5	1.4	0.6	2.4	0.6	0.8	2.7	2.4	1
3.3	1.9	0.6	0.9	0.8	1.4	1.4	1.8	0.8
2.7	1.2	0	1.5	0.3	2.6	2	0.6	0.7
2.8	1.3	0.6	1.6	0.6	0.7	2.8	1.6	2.7
3.6	0.7	0.6	3.1	1	3.6	3.9	2.3	1.9
3.8	1.9	0.9	2.4	0.9	1.3	2.7	0.8	1.2
2.6	2.7	0	1.9	0.8	0.7	2.5	0.5	1.4
2.9	3.5	0.4	1.8	2.6	0.5	2.6	1.9	2.7
3.8	1.3	2.7	1.5	2.2	0.5	0.9	0.3	0
1.7	0.8	2.4	1.8	0.8	1.8	2.9	1.1	0.7
3	0.9	0.6	1	0.7	1.7	2.8	1.1	0
2.2	2.8	0.9	1.4	1.5	2.6	2.8	1.1	1.3
1.9	0.9	1.4	3.4	0.8	1	2.9	1.2	0.4
1.3	0.4	0.6	1.7	0.8	0.4	2.1	0.8	0.6
3.2	1.2	0.4	4.2	0.4	1.1	1	1.6	1.2
1.3	0.5	0.2	2.3	1.5	2.4	2	1.1	1.2
3.1	1	0.5	1.6	0.5	1.6	2.5	0.8	1.1
1.9	0.7	0.4	3	0.8	1.9	2.7	1.2	0.7
3.3	1.7	0.4	1.4	0.8	2.6	2.7	0.8	1.3
3.2	1.1	2.3	2.3	0.9	1.6	5.3	1.1	1.3
3.3	1.3	2.1	2	0.6	0.8	2.7	1	1.3
2.1	2.7	0.4	2.5	0.5	0.9	2.9	1.5	1.2
1.8	4.1	0.4	1.7	0.5	0.4	3.7	0.9	0.5
2.3	2.7	0.6	0.4	1	3.2	1.7	0.9	2.2
3.5	2.9	1.6	2.6	1.3	2.4	4.1	0.8	0.6
1.6	4.2	0.4	2.6	0.9	1.3	3.1	1.2	2.2
2.1	1	0.2	2.2	0.6	0.4	2.4	0.6	2.7
2.7	1.8	0.5	0.8	0.7	2.3	2.2	1.3	0.9
2.9	1	0.9	2.8	0.6	1.1	1.9	1.5	0.9
1.5	1.2	0.6	2.3	1	3.4	1.7	1.6	1.1
2.7	1.3		0.9	0.4	2.3	2.4	1.9	1.6
3.7	1.1		0.9	0.4	1.4	1.8	1	1.9
2.5	4.7		1.8	0.7	0.7	2.3	1.3	0.7
3.4	1.9		2.2	1.3	0.5	2.6	0.6	1
2.2	2.9		0.6	0.8	3	3.6	2.5	0.8
1	1.3		1.8	1.6	0.7	2.8	1.3	1
2.7			3.1	0.9	2.3	2	0.8	2.1
3			2.7	1.5	0.6	3.4	1.2	3.3
3.3			3.2	0.6	0.2	0.7	1.1	2.4
2.9			2.2	0.8	0.8	2.5	1.1	2.6
2.3			2	0.7	2.1	2.9	1.5	2.1
0.4			2.2	3.4	0.5	3.1	1.4	0.6
1.3			3.2	2.5	0.4	2.1	1.7	1.9
2.3			1.7	3.1	0.3	2	0.7	3.1
3.5			1.9	0.6	2.3	1.1	1.6	1.2
1.4			2.2	2.2	1.2	4.1	0.8	2.1
2			3.2	3.3	0.7	1.8	0.5	2.5
1.5			2.2	3.2	0.6	3	0.3	3.1
3			3.8	1.7	0.9	3.2	0.9	3.4
3.4			2.9	2.4	0.1	1.9	1.2	2.1
1.8			2.7	2.9	0.1	0.6	1.2	3.1
1.8			2.7	1.1	0.5	2.6	0.6	1.8
2.3			3.1	2.1	0.9	1.9	1.5	1.6
2.9			2.4	2.9	0.8	1.7	1.8	2
2.1			2.4	3.9	0.8	2.4	0.7	2.4
2.8			3.8	1.3	2.2	1.2	0.7	4
3.1			2.1	1.4	1.2	3.3	1.2	2.1
1.6			0.3	1	0.4	2.9	1.2	0.9
3.8			3	1	1	0.3	1.2	2.1
2.3			1.5	1.2	2.2	2.8	0.6	1.1
2.1			2.2	2.2	3.1	2.1	2.7	3.2
2.5			3.1	0.9	1	2.3	0.6	2.4
2			1.4	3.1	0.6	3.9	1	2
3.2			1.5	0.9	0.9	1.6	1.1	2.4
1.5			2.7	0.8	0.7	3.3	2	2.5
1.8			3.6	1	1.6	2.6	0.8	3
3.8			2	1.3	3.3	2.1	0.9	2.1
1.5			2.5	0.9	1.3	1.3	0.8	1.3
2.6			2.2	1.9	3.4	1.3	0.5	2.6
3.3			2.4	1	1.1	1.9	0.8	2.5
3			3	1	3.6	1.9	1.7	1.8
2.5			1.8	1.1	0.8	2.7	1.6	1.1
2.8			2.8	3.4	0.8	2.9	2.1	1.6
3.1			2.8	0.5	0.4	1.5	2.4	2
1.5			2.5	0.6	0.8	2.6	1.5	0.8
3.4			1.4	0.4	0.9	1.5	1.6	0.9
2.7			3.3	2.6	0.9	3.1	0.6	1.2
3.1			1.2	3.8	0.6	3	0.7	0.7
2.1			2.3	0.7	0.9	0.9	2.1	2.1
3.2			2.7	2	0.8	1.3	1.1	0.6
2.9			2.3	3.1	0.4	1.5	1.9	1.6
3.1			3.2	1.4	0.5	3	1.3	0.4
3			2.8	2	0.3	3.6	1	0.7
3.7			2.4	0.4	3.1	2	1.5	1.8
3.6			2.4	1.2	1.2	2.1	1.3	1.6
0.8			2.9	2.7	0.6	1	0.8	0.6
2.7			1	0.6	0.8	2.6	1.4	1.2
3			2.8	3.1	0.7	2	0.9	0.8
3.4			2.4	3.5	0.3	3.1	0.9	0.5
2.8			1.4	1.2	0.6	3.6	1	1
2.7			0.7	3.3	0.2	2.3	0.7	0.7
2.4			2.9	3.5	0.7	2.8	1	0.5
2.3			2.4	1.3	0.6	4.2	1.8	0.8
3.5			2.8	1.8	1.1	2.1	0.7	0.7
2.2			0.6	0.9	0.8	3.5	1.7	2.8
1.4			1.8	1.1	1.3	3.4	1.8	0.9
2			3.1	3.1	0.9	2.7	1.3	0.8
3.4			2.3	0.8	0.4	3.1	1.4	1.1
2.8			3	1	0.7	2.8	1.5	2.5
1.5			2.4	1	0.3	2.9	1.7	2.1
2.9			2	2.2	0.6	1.6	1.3	1.2
3.5			1.1	1	0.6	1	2.1	1.1
1			1.6	3		3.2	0.6	0.8
2			2.2	0.7		1.3	1.1	0.7
1.6			2.5	3.6		1.3	0.5	0.2
3.2			1.9	1.1		2.2	1.4	2.8
2.4			1.7	0.7		2.2	0.8	2
2.8			2.6	0.8		1.9	1	1.1
2.6			0.8	0.8		1.5	2.9	0.6
2.2			3.3	3.2		1	1.3	1.7
2			1.1	1.9		1.9	1.6	1.1
2.4			2.8	0.9		2.3	2.6	0.9
1.4			2.7	0.8		3.4	1.5	0.7
3.3			2.9	0.9		3.3	3.2	1.7
2.9			1.9	0.7		4.8	3.5	1.4
2.4			1.9	1		3.5	1.9	2.3
3.3			2.3	0.9		2.9	2	2.2
1.1			1.2	0.4		2.1	1.1	1.9
2.6			2.2	1.2		2	1.5
3.3			0.8	0.4		2.4	2.1
2.4			0.5	1.7		3.3	2.1
2.1			1.3	0.6		3.4	1
2.2			3.8	0.6		0.5	0.9
1.2			3	0.5		3.3	1.3
2.2			3.3	0.8		3.7	1.9
4.2			2.9	2.4		2.7	1.8
2.4			3.2	1.2		2.3	1.6
3.1			2.8	2		3.1	2.5
2.6			2	1		1.6	1.9
2.4			2.5	3.1		1.6	1.3
4.9			2.5	1.6		3.3	1.6
2.8			2.8	1.3		3.5	1.7
1.6			2.2	2.7		1.3	2.2
2.8			2.6	1.6		1.7	0.9
2.5			2.2	1.4		2.1	1.7
1.3			2.9	2		1.8	2.8
2			2.6	0.9		2.6	1.7
3.2			2.3	0.9		3.1	2
2.3			2.2	2.1		2.8	0.9
2.7			2.7	3		2.4	0.4
2.3			3.3	1.1		2.3	0.7
3.6			3.1	1.2		3.6	1.2
1.5			2.5	1		3.2	2.3
1.7			1.7	2.7		2.3	0.7
2.9			2.1	4		1.7	1
1.6			2.4	3.5		1.3	0.9
2.2			1.7	3.8		1.9	1
3.5			2.3	3.7		2.6	3.7
2.1			1.2	1.7		3.8	0.9
1.6			2.2			2.8	0.7
3.1			1.3			1	2.7
2.4			0.6			2.5	1.3
3.1			1.9			2.8	1.4
2.8			1.3			1.5	1
1			1.5			3.5	1.2
2.3			1.6			2.3	2
1.6			2.3			1.7	1.9
3.9			3.6			3.1	1.4
3.4			1.6			1.1	1.5
2.5			2.5			3.3	1.4
3			1.8			3.2	2.2
1.5			3.1			3.3	1.1
3.7			3.8			2.7	2.2
1.7			1.8			1.5	3
2.1			2.1			2.4	1.4
1.8			1.9			3.1	2.6
3.1			2.4			3	1.4
2.4			3.3			1.7	2.3
1.2			3.1			2.8	1.7
2			1.4			4.2	0.7
2.6			1			3.2	1.1
2.4			1.8			2.1	1.5
3			2.9			2.5	1
0.9			0.8			2.1	1.1
3			3.7			3.6	1.2
3.6			2.6			2	1.2
3.3			3			3.2	0.6
3			3.1			3.6	3.2
1.1			2.4			3	1.1
2.9			2.6			2.1	1.1
2.6			2.8			2.4	2
3.4			4.7			3.4	2.9
2.7			2.5			1.8	0.9
2.2			1.1			2.8	0.8
1			3.8			1.6	2.3
4.4			3.1			3.7	2.7
2.6			1.3			2.6	1.3
3.9			1.7			2.9	2.4
2.9			2.7			2.2	0.8
3.8			1.7			1.3	1.5
2.7			3.7			3.5	3.7
3.3			1.6			2.5	2.4
2.4			2.2			3.2	3.3
2.7			3.3			2.7	2.6
3.5			2.6			2.7	2.5
4			1.4			2.6	2.2
3.8						3.6	1.4
3						3.4	3.2
2.3						1.4
2.9						3.9
3						2.7
2.1						3.1
2.9						1.8
1.9						1.2
2.1						2
0.8						3.4
1.3						2.1
2.6						1.4
3.3						3.6
2.5						3.2
1.1						3.7
1.9						3.2
1.1						2.3
2						1.7
3.8
2.6
3.3
3.3
0.3
1.1
1.6
1.9
2.2
1.5
0.2
2.2
2.3
2.8
3.8
1.4
2.4
2.3
3.4
2.7
0.7
1.6
2.4
1.5
3.1
2.6
2.4
4.1
2.3
3.6
0.3
2.5
3
1.9
1.8
3.5
3.5
3.4
2.6
2.4
1.9
3.2
0.6
3.4
3.1
1.2
1
1.9
3.2
2.4
1.4
0.4
1.1
1.8
