# Supplementary material for: Analysis of meiosis in Pristionchus pacificus reveals plasticity in homolog pairing and synapsis in the nematode lineage
Source: eLife. 2021 Aug 24;10:e70990. doi: 10.7554/eLife.70990 (PMC8455136; doi:10.7554/eLife.70990)
Supplement: Figure 8—source data 1. [file elife-70990-fig8-data1.xlsx]

## Sheet: Legend
tab	description
XXgt	Genotype calls for the 93 individual F2 progeny used for mapping crossovers in hermaphrodite oocytes. Each column represents one hybrid progeny in arbitrary order. "A" genotypes are inherited from the California PS312 (CA), F0 parent, "R" genotypes are inherited from the La Réunion Island RSB001 F0 parent.
XOgt	Genotype calls for the 93 individual F2 progeny used for mapping crossovers in male spermatocytes. Each column represents one hybrid progeny in arbitrary order (same order as in Table S5). The "A" genotypes were inherited from the California PS312 (CA), F0 parent, "W" genotypes are inherited from the Washington PS1843 F0 parent.
Map_position	Map distances in centimorgans (cM) generated with OneMap based on the data in Tables S5 and S6, using the 'record' algorithm.

## Sheet: XXgt
chr	MB	f2.001	f2.002	f2.003	f2.004	f2.005	f2.006	f2.007	f2.008	f2.009	f2.010	f2.011	f2.012	f2.013	f2.014	f2.015	f2.016	f2.017	f2.018	f2.019	f2.020	f2.021	f2.022	f2.023	f2.025	f2.026	f2.027	f2.028	f2.029	f2.030	f2.031	f2.032	f2.033	f2.034	f2.035	f2.036	f2.037	f2.038	f2.039	f2.040	f2.041	f2.042	f2.043	f2.044	f2.045	f2.046	f2.047	f2.048	f2.049
ChrI	0	A	R	R	NA	R	R	R	NA	R	R	R	R	R	R	R	A	NA	R	R	NA	R	R	A	A	R	NA	R	A	NA	A	A	R	R	A	A	A	R	A	R	R	R	A	NA	R	A	A	R	R
ChrI	0.1	A	R	R	A	R	R	R	A	R	R	R	R	R	R	R	A	A	R	R	A	R	R	A	A	R	A	R	A	A	A	A	R	R	A	A	A	R	A	R	R	R	A	A	R	A	A	R	R
ChrI	0.2	A	R	R	NA	R	R	R	A	R	R	R	R	R	R	R	A	A	R	R	A	R	R	A	A	R	A	R	A	A	A	A	R	R	A	A	A	R	A	R	R	R	A	A	R	A	A	R	R
ChrI	0.3	A	R	R	A	R	R	R	A	R	R	R	R	R	R	R	A	A	R	R	A	R	R	A	A	NA	A	R	A	A	A	A	R	R	A	A	A	R	A	R	R	R	A	A	R	A	A	R	R
ChrI	0.4	A	R	R	A	R	R	R	A	R	R	R	R	R	R	R	A	NA	R	R	A	R	R	A	A	R	A	R	A	A	A	A	R	R	A	A	A	R	A	R	R	R	A	A	R	A	A	R	R
ChrI	0.5	A	R	R	A	R	R	R	A	R	R	R	R	R	R	R	A	A	R	R	A	R	R	A	A	R	A	R	A	A	A	A	R	R	A	A	A	R	A	R	R	R	A	A	R	A	A	R	R
ChrI	0.6	A	R	R	A	R	R	R	A	R	R	R	R	R	R	R	A	A	R	R	A	R	R	A	A	R	A	R	A	A	A	A	R	R	A	A	A	R	A	R	R	R	A	A	R	A	A	R	R
ChrI	0.7	A	R	R	A	R	R	R	A	R	R	R	NA	R	R	R	A	A	R	R	A	R	R	A	A	R	A	R	A	A	A	A	R	R	A	A	A	R	A	R	R	R	A	A	R	A	A	R	R
ChrI	0.8	A	R	R	A	R	R	R	A	R	R	R	R	R	R	R	A	A	R	R	A	R	R	A	A	R	A	R	A	A	A	A	R	R	A	A	A	R	A	R	R	R	A	A	R	A	A	R	R
ChrI	0.9	A	R	R	A	R	R	R	A	R	R	R	R	R	R	R	A	A	R	R	A	R	R	A	A	R	A	R	A	A	A	A	R	R	A	A	A	R	A	R	R	R	A	A	R	A	A	R	R
ChrI	1	A	R	R	A	R	R	R	A	R	R	R	R	R	R	R	A	A	R	R	A	R	R	A	A	R	A	R	A	A	A	A	R	R	A	A	A	R	A	R	R	R	A	A	R	A	A	R	R
ChrI	1.1	A	R	R	A	R	R	R	A	R	R	R	R	R	R	R	A	A	R	R	A	R	R	A	A	NA	A	R	A	A	R	A	R	R	A	A	A	R	A	R	R	R	A	A	R	A	A	R	R
ChrI	1.3	A	R	R	A	R	R	R	A	R	R	R	R	R	NA	R	A	A	R	R	A	R	R	A	A	R	A	R	A	A	R	A	R	R	A	A	A	R	A	R	R	R	A	A	R	A	A	R	R
ChrI	1.5	A	R	R	A	R	R	R	A	R	R	R	R	R	R	R	A	A	R	R	A	R	R	A	A	R	A	R	A	A	R	A	R	R	A	A	A	R	A	R	R	R	A	A	R	A	A	R	R
ChrI	1.6	A	R	R	A	R	R	R	A	R	R	R	R	R	R	R	A	A	R	R	A	R	R	A	A	R	A	R	A	A	R	A	R	R	A	A	A	R	A	R	R	R	A	A	R	A	A	R	R
ChrI	1.7	A	R	R	NA	R	R	R	A	R	R	R	R	R	R	NA	A	NA	R	R	NA	R	R	A	A	R	A	R	A	A	R	A	R	R	A	A	A	R	A	R	R	R	A	A	R	NA	A	R	R
ChrI	1.8	A	R	R	A	R	R	R	A	R	R	R	R	R	R	R	A	A	R	R	NA	R	R	A	A	R	A	R	NA	A	R	A	R	R	A	A	A	R	A	R	R	R	A	A	R	A	A	R	R
ChrI	1.9	A	R	R	A	R	R	R	A	R	R	R	R	R	R	R	A	A	R	R	A	R	R	A	A	R	A	R	A	A	R	A	R	R	A	A	A	R	A	R	R	R	A	A	R	A	A	R	R
ChrI	2	A	R	R	A	R	R	R	A	R	R	R	R	R	R	R	A	A	R	R	A	R	R	A	A	R	A	R	A	A	R	A	R	R	A	A	A	R	A	R	R	R	A	A	R	A	A	R	R
ChrI	2.1	A	R	R	A	R	R	R	A	R	R	R	R	R	R	R	A	A	R	R	A	R	R	A	A	R	A	R	A	A	R	A	R	R	A	A	A	R	A	R	R	R	A	A	R	A	A	R	R
ChrI	2.2	A	R	R	A	R	R	R	A	R	R	R	R	R	R	R	A	NA	R	R	A	R	R	A	A	R	R	R	A	A	R	A	R	R	NA	A	A	R	A	R	R	R	A	NA	R	A	A	R	R
ChrI	2.3	A	R	R	A	R	R	R	A	R	R	R	R	R	R	R	A	R	R	R	NA	R	R	A	A	R	R	R	A	A	R	A	R	R	A	A	A	R	A	R	R	R	A	A	R	A	A	R	R
ChrI	2.4	A	R	R	A	R	R	R	A	R	R	R	R	R	R	R	A	R	R	R	A	NA	R	A	A	R	R	R	A	A	R	A	R	R	A	A	A	R	A	R	R	R	A	A	R	A	A	R	R
ChrI	2.5	A	R	R	A	R	R	R	A	R	R	R	R	R	R	R	A	R	R	R	A	R	R	A	A	R	R	R	A	A	R	A	R	R	A	A	A	R	A	R	R	R	A	A	R	A	A	R	R
ChrI	2.6	A	R	R	A	R	R	R	A	R	NA	R	NA	R	NA	R	A	R	R	R	A	R	R	A	A	R	R	NA	A	NA	R	A	R	R	A	A	A	NA	A	NA	R	R	A	A	R	A	A	R	R
ChrI	2.7	A	R	R	A	R	R	R	A	R	R	R	R	R	R	R	A	NA	R	R	A	R	R	A	A	R	R	R	A	R	R	A	R	R	A	A	A	R	A	R	R	R	A	A	R	A	A	R	R
ChrI	2.8	A	R	R	A	R	R	R	A	R	R	R	R	R	R	NA	NA	R	R	R	A	R	R	A	A	R	R	R	A	R	R	A	R	R	A	A	A	R	A	R	R	NA	A	A	R	A	A	R	R
ChrI	2.9	A	R	R	A	R	R	R	A	R	R	R	R	R	R	R	R	R	R	R	A	R	R	A	A	R	R	R	A	R	R	A	R	R	A	A	A	R	A	R	R	R	A	A	R	A	A	R	R
ChrI	3	A	R	R	A	R	R	R	A	R	R	R	R	R	R	R	R	R	R	R	A	R	R	A	A	R	R	R	A	R	R	A	R	R	A	A	A	R	A	R	R	R	A	A	R	A	A	R	R
ChrI	3.1	A	R	R	A	R	R	R	A	R	R	R	NA	R	R	R	R	R	R	R	A	R	R	A	A	R	R	R	A	R	R	A	R	R	A	A	A	R	A	R	R	R	A	A	R	A	A	R	R
ChrI	3.2	A	R	R	A	R	R	R	A	R	R	R	R	R	NA	R	R	NA	R	R	A	R	R	A	A	R	R	R	A	R	R	A	R	R	A	A	A	R	A	R	R	R	A	A	R	A	A	R	R
ChrI	3.3	A	R	R	A	R	R	R	A	NA	R	R	R	R	R	NA	R	NA	R	R	A	R	R	A	A	R	R	R	A	R	R	A	R	R	A	A	A	NA	A	R	R	R	A	A	R	A	A	R	R
ChrI	3.4	A	R	R	A	R	R	R	A	R	R	R	R	R	R	R	R	R	R	R	A	R	R	A	A	R	R	R	A	R	R	A	R	R	A	A	A	R	A	R	R	R	A	A	R	A	A	R	R
ChrI	3.5	A	R	R	A	R	R	R	A	R	R	R	R	R	R	R	R	R	R	R	A	R	R	A	A	R	R	R	A	R	R	A	R	R	A	A	A	R	A	R	R	R	A	A	R	A	A	R	R
ChrI	3.6	A	R	R	A	R	NA	R	A	R	R	R	R	R	R	R	R	R	R	R	A	R	R	A	A	NA	R	R	A	R	R	A	R	R	A	A	A	R	A	R	R	R	A	NA	R	A	R	R	R
ChrI	3.7	A	R	R	A	R	R	R	A	R	R	R	R	R	R	R	R	R	R	R	A	R	R	A	A	R	R	R	A	R	R	A	R	R	A	A	A	R	A	R	R	R	A	R	R	A	R	R	R
ChrI	3.8	A	R	R	A	R	R	R	A	R	R	R	R	R	R	R	R	R	R	R	A	R	R	A	A	R	R	R	A	R	R	A	R	R	A	A	A	R	A	R	R	R	A	R	R	A	R	R	R
ChrI	3.9	A	R	R	A	R	R	R	A	R	R	R	R	R	R	R	R	R	R	R	A	R	R	A	A	R	R	R	A	R	R	A	R	R	A	A	A	R	A	R	R	R	A	R	R	A	R	R	R
ChrI	4	A	R	R	NA	R	R	NA	NA	R	R	R	R	R	R	NA	R	R	R	R	A	R	R	A	A	R	R	R	A	R	R	NA	NA	R	A	A	A	R	NA	R	R	R	A	R	R	NA	R	R	R
ChrI	4.1	A	R	R	A	R	R	R	A	R	R	R	R	R	R	R	R	R	R	R	A	R	R	A	A	R	R	R	A	R	R	A	R	R	A	A	A	R	A	R	R	R	A	R	R	A	R	R	R
ChrI	4.2	A	R	R	A	R	NA	R	A	R	R	R	R	R	R	R	R	R	R	R	A	NA	R	A	A	R	R	R	A	R	R	A	R	R	A	A	A	R	A	R	R	R	A	R	R	A	R	R	R
ChrI	4.3	A	R	R	A	R	R	R	A	R	R	R	R	R	R	R	R	R	R	R	A	R	R	A	A	R	R	R	A	R	R	A	R	R	NA	A	A	R	A	R	R	R	A	R	R	A	R	R	R
ChrI	4.4	A	R	R	A	R	R	R	A	R	R	R	R	R	R	R	R	R	R	R	A	R	R	A	A	R	R	R	A	R	R	A	R	R	A	A	R	R	A	R	R	R	A	R	R	A	R	R	R
ChrI	4.5	A	R	R	NA	R	R	R	A	R	R	R	R	R	R	R	R	R	R	R	NA	R	R	A	A	R	R	R	A	R	R	A	R	R	A	A	R	R	A	R	R	R	A	R	R	A	R	R	R
ChrI	4.6	A	R	R	A	R	R	R	A	R	R	R	R	R	R	R	R	R	R	R	A	R	R	NA	A	R	R	R	A	R	R	A	R	R	A	A	R	R	A	R	R	R	A	R	R	A	R	R	R
ChrI	4.7	A	R	R	A	R	R	R	A	R	R	R	R	R	R	R	R	R	R	R	A	R	R	A	A	R	R	R	NA	R	R	A	R	R	A	A	R	R	A	R	R	R	A	R	R	A	R	R	R
ChrI	4.8	A	R	R	NA	R	R	R	A	R	R	R	R	R	R	R	R	R	R	R	A	R	R	NA	A	R	R	R	NA	R	R	A	R	R	NA	A	R	R	A	R	R	R	A	R	R	A	R	R	R
ChrI	4.9	A	R	R	A	R	R	R	A	R	R	R	R	R	R	R	R	R	R	R	A	R	R	A	A	R	R	R	A	R	R	A	R	R	A	A	R	R	A	R	R	R	A	R	R	A	R	R	R
ChrI	5	A	R	R	A	R	R	R	A	R	R	R	R	R	R	R	R	R	R	R	A	R	R	A	A	R	R	R	A	R	R	A	R	R	A	A	R	R	A	R	R	R	A	R	R	A	R	R	R
ChrI	5.1	A	R	R	A	R	R	R	A	R	R	R	R	R	R	R	R	R	R	R	A	R	R	NA	A	R	R	R	A	R	R	A	R	R	A	A	R	R	A	R	R	R	A	R	R	A	R	R	R
ChrI	5.2	A	R	R	A	R	R	R	A	R	R	R	R	R	R	R	R	R	R	R	A	R	R	A	A	R	R	R	A	R	R	A	R	R	A	A	R	R	A	A	R	R	A	R	R	A	R	R	R
ChrI	5.3	A	R	R	A	R	R	R	A	R	R	R	R	R	R	R	R	R	R	R	A	R	R	NA	A	R	R	R	A	R	R	A	R	R	A	A	R	R	A	A	R	R	A	R	R	A	R	R	R
ChrI	5.4	A	R	R	A	R	R	R	A	R	R	R	R	R	R	R	R	R	R	R	A	R	R	A	A	R	R	R	A	R	R	A	R	R	A	A	R	R	A	A	R	R	A	R	R	A	R	R	R
ChrI	5.5	A	R	R	A	R	R	R	A	R	R	R	R	R	R	R	R	R	R	R	A	R	R	A	A	R	R	R	A	R	R	A	R	R	A	A	R	R	A	A	R	R	A	R	R	A	R	R	R
ChrI	5.6	A	R	R	A	R	R	R	A	R	R	R	R	R	R	R	R	R	R	R	NA	R	R	A	A	R	R	R	A	R	R	A	R	R	A	A	R	R	A	A	R	R	A	R	R	NA	R	R	R
ChrI	5.7	A	R	R	A	R	R	R	A	R	R	R	R	R	R	R	R	R	R	R	NA	R	R	A	A	R	R	R	A	R	R	A	R	R	A	A	R	R	A	A	R	R	A	R	R	R	R	R	R
ChrI	5.8	A	R	R	A	R	R	R	A	R	R	R	R	R	R	R	R	R	R	R	A	R	R	A	A	R	R	R	A	R	R	A	R	R	A	A	R	R	A	A	R	R	A	R	R	R	R	R	R
ChrI	5.9	A	R	R	R	R	R	R	A	R	R	R	R	R	R	R	R	R	R	R	NA	R	R	NA	A	R	R	R	NA	R	R	A	R	R	NA	A	R	R	A	A	R	R	A	R	R	R	R	R	R
ChrI	6	A	R	R	R	R	R	R	A	R	R	R	R	R	R	R	R	R	R	R	A	R	R	A	A	R	R	R	A	R	R	A	R	R	NA	A	R	R	A	A	R	R	A	R	R	R	R	R	R
ChrI	6.1	A	R	R	R	R	R	R	A	R	R	R	R	R	R	R	R	R	R	R	A	R	R	A	A	R	R	R	A	R	R	A	R	R	NA	A	R	R	A	A	R	R	A	R	R	R	R	R	R
ChrI	6.2	A	R	R	R	R	R	R	NA	R	R	R	R	R	R	R	R	R	R	R	A	R	R	A	R	R	R	R	NA	R	R	A	R	R	A	A	R	R	A	A	R	R	A	R	R	R	R	R	R
ChrI	6.3	A	R	R	R	R	R	R	A	R	R	R	R	R	R	R	R	R	R	R	A	R	R	A	R	R	R	R	A	R	R	A	R	R	NA	A	R	R	A	A	R	R	A	R	R	R	R	R	R
ChrI	6.4	A	R	R	R	R	R	R	A	R	R	R	R	R	R	R	R	R	R	R	A	R	R	A	R	R	R	R	NA	R	R	A	R	R	A	A	R	R	A	A	R	R	A	R	R	R	R	R	R
ChrI	6.5	A	R	R	R	R	R	R	A	NA	R	NA	R	R	R	R	R	NA	R	R	NA	R	R	A	R	NA	NA	NA	A	R	R	A	R	R	A	A	R	R	A	A	R	R	A	R	R	R	NA	R	R
ChrI	6.7	A	R	R	R	R	R	R	A	R	R	R	R	R	R	R	R	R	R	R	R	R	R	A	R	R	R	R	A	R	R	A	R	R	A	A	R	R	A	A	R	R	A	R	R	R	R	R	R
ChrI	6.8	A	R	R	R	R	R	R	A	R	R	R	R	R	R	R	R	R	R	R	R	R	R	A	R	R	R	R	A	R	R	A	R	R	NA	A	R	R	A	A	R	R	A	R	R	R	R	R	R
ChrI	6.9	A	R	R	R	R	R	R	A	R	R	R	R	R	R	R	R	R	R	R	R	R	R	A	R	R	R	R	A	R	R	A	R	R	A	A	R	R	A	A	R	R	NA	R	R	R	R	R	R
ChrI	7	A	R	R	R	R	R	R	NA	R	R	R	R	R	R	NA	R	NA	R	R	R	R	R	A	R	R	R	R	NA	R	R	NA	R	R	NA	NA	R	R	NA	A	R	R	R	R	R	R	R	R	R
ChrI	7.1	A	R	R	R	R	R	R	NA	R	R	R	R	R	R	R	R	R	R	R	R	R	R	A	R	R	R	R	A	R	R	NA	R	R	NA	A	R	R	A	A	R	R	R	R	R	R	R	R	R
ChrI	7.2	A	R	R	R	R	R	R	A	R	R	R	R	R	R	R	R	R	R	R	R	R	R	NA	R	R	R	R	A	R	R	A	R	R	NA	A	R	R	A	A	R	R	R	R	R	R	R	R	R
ChrI	7.3	A	R	R	R	R	R	R	A	R	R	R	R	R	R	R	R	R	R	R	R	R	R	A	R	R	R	R	A	R	R	A	R	R	NA	A	R	R	A	A	R	R	R	R	R	R	R	R	R
ChrI	7.4	A	R	R	R	R	R	R	A	R	R	R	R	R	R	NA	R	R	R	R	R	R	R	A	R	R	R	R	A	R	R	A	R	R	A	A	R	R	A	A	R	R	R	R	R	R	R	R	R
ChrI	7.5	A	R	R	R	R	R	R	A	R	R	R	R	R	R	R	R	R	R	R	R	R	R	A	R	R	R	R	NA	R	R	A	R	R	A	A	R	R	A	A	R	R	R	R	R	R	R	R	R
ChrI	7.6	A	R	R	R	R	R	R	A	R	R	R	R	R	R	R	R	NA	R	R	R	R	R	A	R	R	R	R	A	R	R	A	NA	R	A	A	R	R	A	A	R	NA	R	R	R	R	R	R	R
ChrI	7.7	A	R	R	R	R	R	R	A	R	R	R	R	R	R	R	R	R	R	R	R	R	R	A	R	R	R	R	A	R	R	A	R	R	A	A	R	R	A	A	R	R	R	R	R	R	R	R	R
ChrI	7.8	A	R	R	R	R	R	R	A	R	R	R	R	R	R	R	R	R	R	R	R	R	R	A	R	R	R	R	NA	R	R	A	R	R	NA	A	R	R	A	A	R	R	R	R	R	R	R	R	R
ChrI	7.9	A	R	R	R	R	R	R	A	R	R	R	R	R	R	R	R	R	R	R	R	R	R	A	R	R	R	R	NA	R	R	A	R	R	NA	A	R	R	A	A	R	R	R	R	R	R	R	R	R
ChrI	8	A	R	R	R	R	R	R	A	R	R	R	R	R	R	R	R	R	R	R	R	R	R	A	R	R	R	R	A	R	R	A	R	R	NA	A	R	R	A	A	R	R	R	R	R	R	R	R	R
ChrI	8.1	A	R	R	R	R	R	R	A	R	R	R	R	R	R	R	R	R	R	R	R	R	R	NA	R	R	R	R	A	R	R	A	R	R	NA	A	R	R	A	A	R	R	R	R	R	R	R	R	R
ChrI	8.2	A	R	R	R	R	R	R	NA	R	R	R	R	R	R	R	R	R	R	R	R	R	R	A	R	R	R	R	A	R	R	A	R	R	A	A	R	R	A	A	R	R	R	R	R	R	R	R	R
ChrI	8.3	A	R	R	R	R	R	R	R	R	R	R	R	R	R	R	R	R	R	R	R	R	R	A	R	R	R	R	A	R	R	A	R	R	A	A	R	R	A	A	R	R	R	R	R	R	R	R	R
ChrI	8.4	A	R	R	R	R	R	R	R	R	R	R	R	R	R	R	R	R	R	R	R	R	R	A	R	R	R	R	A	R	R	A	R	R	A	A	R	R	A	A	R	R	R	R	R	R	R	R	R
ChrI	8.6	A	R	R	R	R	R	R	R	R	R	R	R	R	R	R	R	R	R	R	R	R	R	A	R	R	R	R	A	R	R	A	R	R	A	A	R	R	A	A	R	R	R	R	R	R	R	R	R
ChrI	8.7	A	R	R	R	R	R	NA	R	R	R	R	R	R	R	R	R	R	R	R	R	R	R	A	R	R	R	R	NA	R	R	NA	R	R	A	A	R	R	A	A	R	R	R	R	R	R	R	R	R
ChrI	8.8	A	R	R	R	R	R	R	R	R	R	R	R	R	R	R	R	R	R	R	R	R	R	A	R	R	R	R	NA	R	R	A	R	R	A	A	R	R	A	A	R	R	R	R	R	R	R	R	R
ChrI	8.9	A	R	R	R	R	R	R	R	R	R	R	R	R	R	R	R	R	R	R	R	R	R	A	R	R	R	R	NA	R	R	NA	R	R	NA	A	R	R	NA	A	R	R	R	R	R	R	R	R	R
ChrI	9	A	R	R	R	R	R	R	R	R	R	R	R	R	R	R	R	R	R	R	R	R	R	A	R	R	R	R	A	R	R	A	R	R	A	A	R	R	A	A	R	R	R	R	R	R	R	R	R
ChrI	9.1	A	R	R	R	R	R	R	R	R	R	R	R	R	R	R	R	R	R	R	R	R	R	NA	R	R	R	R	A	R	R	A	R	R	A	A	R	R	A	A	R	R	R	R	R	R	R	R	R
ChrI	9.2	A	NA	R	R	R	R	R	R	R	R	R	R	R	R	R	R	R	R	R	R	R	R	A	R	R	R	R	A	R	R	A	R	R	NA	A	R	R	A	A	R	R	R	R	R	R	R	R	R
ChrI	9.3	A	R	R	R	R	R	R	R	R	R	R	R	R	R	R	R	R	R	R	R	R	R	A	R	R	R	R	A	R	R	A	R	R	A	A	R	R	A	A	R	R	R	R	R	R	R	R	R
ChrI	9.4	A	R	R	R	R	R	R	R	R	R	R	R	R	R	R	R	R	R	R	NA	R	R	A	R	R	R	R	A	R	R	A	R	R	A	A	R	R	A	A	R	R	R	R	R	R	R	R	R
ChrI	9.5	A	R	R	R	R	R	R	R	R	R	R	R	R	NA	R	R	R	R	R	R	R	R	A	R	R	R	R	A	R	R	A	R	R	NA	A	R	R	A	A	R	R	R	R	R	R	R	R	R
ChrI	9.6	A	R	R	R	R	R	R	R	R	R	R	R	R	R	R	R	R	R	R	R	R	R	A	R	R	R	R	NA	R	R	A	R	R	A	A	R	R	A	A	R	R	R	R	R	R	R	R	R
ChrI	9.7	A	R	R	R	R	R	R	R	R	R	R	R	R	R	R	R	R	R	R	R	R	R	A	R	R	R	R	A	R	R	A	R	R	A	A	R	R	A	A	R	R	R	R	R	R	R	R	R
ChrI	9.8	A	R	R	R	R	R	R	R	R	R	R	R	R	R	R	R	R	R	R	R	R	R	A	R	R	R	R	A	R	R	A	R	R	A	A	R	R	A	A	R	R	R	R	R	R	R	R	R
ChrI	9.9	A	R	R	R	R	R	R	R	R	R	R	R	R	NA	R	R	R	R	R	R	R	R	A	R	R	R	R	A	R	R	A	R	R	NA	A	R	R	A	A	R	R	R	R	R	R	R	R	R
ChrI	10	A	R	R	R	R	R	R	R	R	R	R	R	R	R	R	R	R	R	R	R	R	R	A	R	R	R	R	A	R	R	A	R	R	A	A	R	R	A	A	R	R	R	R	R	R	R	R	R
ChrI	10.1	A	R	R	R	R	R	R	R	R	R	R	R	R	R	R	R	R	R	R	R	R	R	A	R	R	R	R	A	R	R	A	R	R	A	A	R	R	A	A	R	R	R	R	R	R	R	R	R
ChrI	10.2	A	R	R	R	R	R	R	R	R	R	R	R	R	R	NA	R	R	R	R	R	R	R	A	R	R	R	R	A	R	R	A	R	R	A	A	R	R	A	A	R	R	R	R	R	R	R	R	R
ChrI	10.3	A	R	R	R	R	R	R	R	R	R	R	R	R	R	NA	R	R	R	R	NA	R	R	A	R	NA	R	R	A	R	R	A	R	R	A	NA	R	R	A	A	R	R	R	R	R	R	R	R	R
ChrI	10.4	A	R	R	R	R	R	R	R	R	R	R	R	R	R	R	R	R	R	R	R	R	R	NA	R	R	R	R	A	R	R	A	R	R	A	A	R	R	A	A	R	R	R	R	R	R	R	R	R
ChrI	10.5	A	R	R	R	R	R	R	R	R	R	R	R	R	R	R	R	R	R	R	R	R	R	A	R	R	R	R	A	R	R	A	R	R	NA	A	R	R	A	A	R	R	R	R	R	R	R	R	R
ChrI	10.6	A	R	R	R	R	R	R	R	R	R	R	R	R	R	R	R	R	R	R	R	R	R	A	R	R	R	R	A	R	R	A	R	R	NA	A	R	R	A	A	R	R	R	R	R	R	R	R	R
ChrI	10.7	A	R	R	R	R	R	R	R	R	R	R	R	R	R	R	R	R	R	R	R	R	R	A	R	R	R	R	A	R	R	A	R	R	A	A	R	R	A	A	R	R	R	R	R	R	R	R	R
ChrI	10.8	A	R	R	R	R	R	R	R	R	R	R	R	R	R	R	R	R	R	R	R	R	R	A	R	R	R	R	A	R	R	A	R	R	A	A	R	R	A	A	R	R	R	R	R	R	R	R	R
ChrI	10.9	A	R	R	R	R	R	R	R	R	R	R	R	R	R	R	R	R	R	R	R	R	R	A	R	R	R	R	A	R	R	A	R	R	A	A	R	R	A	A	R	R	R	R	R	R	R	R	R
ChrI	11	A	R	R	R	R	R	R	R	R	R	R	R	R	R	R	R	R	R	R	R	R	R	NA	R	R	R	R	NA	R	R	A	R	R	NA	A	R	R	A	NA	R	R	R	R	R	R	R	R	R
ChrI	11.1	A	R	R	R	R	R	R	R	R	R	R	R	R	R	R	R	R	R	R	R	R	R	A	R	R	R	R	NA	R	R	A	R	R	NA	A	R	R	A	A	R	R	R	R	R	R	R	R	R
ChrI	11.2	A	R	R	R	R	R	R	R	R	R	R	R	R	R	R	R	R	R	R	R	R	R	NA	R	R	R	R	A	R	R	A	R	R	NA	A	R	R	A	A	R	R	R	R	R	R	R	R	R
ChrI	11.3	A	R	R	R	R	R	R	R	R	R	R	R	R	R	R	R	R	R	R	R	R	R	A	R	R	R	R	NA	R	R	A	R	R	A	A	R	R	A	A	R	R	R	R	R	R	R	R	R
ChrI	11.4	A	R	R	R	R	R	R	R	R	R	R	R	R	R	R	R	R	R	R	R	R	R	A	R	R	R	R	A	R	R	A	R	R	NA	A	R	R	A	A	R	R	R	R	R	R	R	R	R
ChrI	11.5	A	R	R	R	R	R	R	R	R	R	R	R	R	R	R	R	R	R	R	R	R	R	A	R	R	R	R	NA	R	R	A	R	R	NA	A	R	R	A	A	R	R	R	R	R	R	R	R	R
ChrI	11.6	A	R	R	R	R	R	R	R	R	R	R	R	R	R	R	R	R	R	R	NA	R	R	A	R	R	R	R	A	R	R	A	R	R	A	A	R	R	A	A	R	R	R	R	R	R	R	R	R
ChrI	11.7	A	R	R	R	R	R	R	R	R	R	R	R	R	R	R	R	R	R	R	R	R	R	A	R	R	R	R	NA	R	R	A	R	R	A	A	R	R	A	A	R	R	R	R	R	R	R	R	R
ChrI	11.8	A	R	R	R	R	R	R	R	R	R	R	R	R	R	R	R	R	R	R	R	R	R	NA	R	R	R	R	A	R	R	A	R	R	A	A	R	R	A	A	R	R	R	R	R	R	R	R	R
ChrI	11.9	A	R	R	R	R	R	R	R	R	R	R	R	R	R	R	R	R	R	R	R	R	R	A	R	R	R	R	A	R	R	A	R	R	NA	A	R	R	A	A	R	R	R	R	R	R	R	R	R
ChrI	12	A	R	R	R	R	R	R	R	R	R	R	R	R	R	R	R	R	R	R	R	R	R	NA	R	R	R	R	NA	R	R	A	R	R	A	A	R	R	A	A	R	R	R	R	R	R	R	R	R
ChrI	12.1	A	R	R	R	R	R	R	R	R	R	R	R	R	R	R	R	R	R	R	R	R	R	A	R	R	R	R	A	R	R	A	R	R	NA	A	R	R	A	A	R	R	R	R	R	R	R	R	R
ChrI	12.2	A	R	R	R	R	R	R	R	R	R	R	R	R	R	R	R	R	R	R	R	R	R	A	R	R	R	R	A	R	R	A	R	R	NA	A	R	R	A	A	R	R	R	R	R	R	R	R	R
ChrI	12.3	A	R	R	R	R	R	R	R	R	R	R	R	R	R	R	R	R	R	R	R	R	R	A	R	R	R	R	A	R	R	A	R	R	A	A	R	R	A	A	R	R	R	R	R	R	R	R	R
ChrI	12.4	A	R	R	R	R	R	R	R	R	R	R	R	R	R	R	R	R	R	R	R	R	R	A	R	R	R	R	A	R	R	A	R	R	A	A	R	R	A	A	R	R	R	R	R	R	R	R	R
ChrI	12.5	A	R	R	R	R	R	R	R	R	R	R	R	R	R	R	R	R	R	R	R	R	R	A	R	R	R	R	A	R	R	A	R	R	A	A	R	R	A	A	R	R	R	R	R	R	R	R	R
ChrI	12.6	A	R	R	R	R	R	R	R	R	R	R	R	R	R	R	R	R	R	R	R	R	R	A	R	R	R	R	A	R	R	A	R	R	A	A	R	R	A	A	R	R	R	R	R	R	R	R	R
ChrI	12.7	A	R	R	R	R	R	R	R	R	R	R	R	R	R	R	R	R	R	R	R	R	R	A	R	R	R	R	A	R	R	A	R	R	A	A	R	R	A	A	R	R	R	R	R	R	R	R	R
ChrI	12.8	A	R	R	R	R	R	R	R	R	R	R	R	R	R	R	R	R	R	R	R	R	R	A	R	R	R	R	A	R	R	A	R	R	NA	A	R	R	A	A	R	R	R	R	R	R	R	R	R
ChrI	12.9	A	R	R	R	R	R	R	R	R	R	R	R	R	R	R	R	R	R	R	R	R	R	A	R	R	R	R	A	R	R	A	R	R	A	A	R	R	A	A	R	R	R	R	R	R	R	R	R
ChrI	13	A	R	R	R	R	R	R	R	R	R	R	R	R	R	R	R	R	R	R	R	R	R	A	R	R	R	R	A	R	R	A	R	R	A	A	R	R	A	A	R	R	R	R	R	R	R	R	R
ChrI	13.1	A	R	R	R	R	R	R	R	R	R	R	R	R	R	R	R	R	R	R	R	R	R	A	R	R	R	R	A	R	R	A	R	R	NA	A	R	R	A	A	R	R	R	R	R	R	R	R	R
ChrI	13.2	A	R	R	R	R	R	R	R	R	R	R	R	R	R	R	R	R	R	R	R	R	R	A	R	R	R	R	A	R	R	A	R	R	A	A	R	R	A	A	R	R	R	R	R	R	R	R	R
ChrI	13.3	A	R	R	R	R	R	R	R	R	R	R	R	R	R	R	R	R	R	R	R	R	R	A	R	R	R	R	A	R	R	A	R	R	A	A	R	R	A	A	R	R	R	R	R	R	R	R	R
ChrI	13.4	A	R	R	R	R	R	R	R	R	R	R	R	R	R	R	R	R	R	R	R	R	R	NA	R	R	R	R	A	R	R	A	R	R	A	A	R	R	A	A	R	R	R	R	R	R	R	R	R
ChrI	13.5	A	R	R	R	R	R	R	R	R	R	R	R	R	R	R	R	R	R	R	R	R	R	A	R	R	R	R	NA	R	R	A	R	R	NA	A	R	R	A	A	R	R	R	R	R	R	R	R	R
ChrI	13.6	A	R	R	R	R	R	R	R	R	R	R	R	R	R	R	R	R	R	R	R	R	R	A	R	R	R	R	A	R	R	A	R	R	NA	A	R	R	A	A	R	R	R	R	R	R	R	R	R
ChrI	13.7	A	R	R	R	R	R	R	R	R	R	R	R	R	R	R	R	R	R	R	R	R	R	A	R	R	R	R	A	R	R	A	R	R	NA	A	R	R	A	A	R	R	R	R	R	R	R	R	R
ChrI	13.8	A	R	R	R	R	R	R	R	R	R	R	R	R	R	R	R	R	R	R	R	R	R	A	R	R	R	R	A	R	R	A	R	R	A	A	R	R	A	A	R	R	R	R	R	R	R	R	R
ChrI	13.9	A	R	R	R	R	R	R	R	R	R	R	R	R	R	R	R	R	R	R	R	R	R	A	R	R	R	R	NA	R	R	A	R	R	NA	A	R	R	A	A	R	R	R	R	R	R	R	R	R
ChrI	14	A	R	R	R	R	R	R	R	R	R	R	R	R	R	R	R	R	R	R	R	R	R	A	R	R	R	R	A	R	R	A	R	R	A	A	R	R	A	A	R	R	R	R	R	R	R	R	R
ChrI	14.1	A	R	R	R	R	R	R	R	R	R	R	R	R	R	R	R	R	R	R	R	R	R	A	R	R	R	R	A	R	R	A	R	R	A	A	R	R	A	A	R	R	R	R	R	R	R	R	R
ChrI	14.2	NA	R	R	R	R	R	R	R	R	NA	R	R	R	R	R	R	R	R	R	R	R	NA	A	R	R	R	R	NA	R	R	A	R	R	NA	A	NA	R	A	A	R	R	R	NA	R	R	NA	R	R
ChrI	14.3	A	R	R	R	R	R	R	R	R	R	R	R	R	R	R	R	R	R	R	R	R	R	A	R	R	R	R	A	R	R	A	R	R	A	A	R	R	A	A	R	R	R	R	R	R	R	R	R
ChrI	14.4	NA	R	R	R	R	R	R	R	R	R	R	R	R	R	R	R	R	R	R	R	R	R	NA	R	R	R	R	NA	R	R	NA	R	R	NA	A	R	R	NA	A	R	R	R	R	R	R	R	R	R
ChrI	14.5	A	R	R	R	R	R	R	R	R	R	R	R	R	R	R	R	R	R	R	R	R	R	A	R	R	R	R	A	R	R	A	R	R	A	A	R	R	A	A	R	R	R	R	R	R	R	R	R
ChrI	14.6	A	R	R	R	R	R	R	R	R	R	R	R	R	R	R	R	R	R	R	R	R	R	A	R	R	R	R	A	R	R	A	R	R	A	A	R	R	A	A	R	R	R	R	R	R	R	R	R
ChrI	14.7	A	R	R	R	R	R	R	R	R	R	R	R	R	R	R	R	R	R	R	R	R	R	NA	R	R	R	R	NA	R	R	A	R	R	NA	A	R	R	A	A	R	R	R	R	R	R	R	R	R
ChrI	14.8	A	R	R	R	R	R	R	R	R	R	R	R	R	R	R	R	R	R	R	R	R	R	A	R	R	R	R	A	R	R	A	R	R	NA	A	R	R	A	A	R	R	R	R	R	R	R	R	R
ChrI	14.9	A	R	R	R	R	R	R	R	R	R	R	R	R	R	R	R	R	R	R	R	R	R	A	R	R	R	R	NA	R	R	A	R	R	A	A	R	R	A	A	R	R	R	R	R	R	R	R	R
ChrI	15	A	R	R	R	R	R	R	R	R	R	R	R	R	R	R	R	R	R	R	R	R	R	A	R	R	R	R	A	R	R	A	R	R	A	A	R	R	A	A	R	R	R	R	R	R	R	R	R
ChrI	15.1	A	R	R	R	R	R	R	R	R	R	R	R	R	R	R	R	R	R	R	R	R	R	A	R	R	R	R	A	R	R	A	R	R	A	A	R	R	A	A	R	R	R	R	R	R	R	R	R
ChrI	15.2	A	R	R	R	R	R	R	R	R	R	R	R	R	R	R	R	R	R	R	R	R	R	A	R	R	R	R	A	R	R	A	R	R	A	A	R	R	A	A	R	R	R	R	R	R	R	R	R
ChrI	15.3	A	R	R	R	R	R	R	R	R	R	R	R	R	R	R	R	R	R	R	R	R	R	A	R	R	R	R	A	R	R	A	R	R	A	A	R	R	A	A	R	R	R	R	R	R	R	R	R
ChrI	15.4	A	R	R	R	R	R	R	R	R	R	R	R	R	R	R	R	R	R	R	R	R	R	A	R	R	R	R	NA	R	R	A	R	R	A	A	R	R	A	A	R	R	R	R	R	R	R	R	R
ChrI	15.5	A	R	R	R	R	R	R	R	R	R	R	R	R	R	R	R	R	R	R	R	R	R	A	R	R	R	R	A	R	R	A	R	R	A	A	R	R	A	A	R	R	R	R	R	R	R	R	R
ChrI	15.6	A	R	R	R	R	R	R	R	R	R	R	R	R	R	R	R	R	R	R	R	R	R	A	R	R	R	R	A	R	R	A	R	R	A	A	R	R	A	A	R	R	R	R	R	R	R	R	R
ChrI	15.7	A	R	R	R	R	R	R	R	R	R	R	R	R	R	R	R	R	R	R	R	R	R	A	R	R	R	R	A	R	R	A	R	R	A	A	R	R	A	A	R	R	R	R	R	R	R	R	R
ChrI	15.9	A	R	R	R	R	R	R	R	R	R	R	R	R	R	R	R	R	R	R	R	R	R	NA	R	R	R	NA	NA	R	R	A	R	R	A	A	R	R	A	A	R	R	R	R	R	R	R	R	R
ChrI	16	A	R	R	R	R	R	R	R	R	R	R	R	R	R	R	R	R	R	R	R	R	R	A	R	R	R	R	A	R	R	A	R	R	A	A	R	R	NA	A	R	R	R	R	R	R	R	R	R
ChrI	16.1	A	R	R	R	R	R	R	R	R	R	R	R	R	R	NA	R	R	R	R	R	R	R	A	R	R	R	R	A	R	R	A	R	R	A	A	R	R	A	A	R	R	R	R	R	R	R	R	R
ChrI	16.2	A	R	R	R	R	R	R	R	R	R	NA	NA	R	R	R	R	NA	R	R	R	R	R	A	NA	R	R	NA	A	R	R	A	R	R	A	A	R	R	A	A	R	R	R	R	R	R	NA	R	R
ChrI	16.3	A	R	R	R	R	R	R	R	R	R	R	R	R	R	NA	R	R	R	R	R	R	R	A	R	R	R	R	A	R	R	A	R	R	A	A	R	R	A	A	R	R	R	R	R	R	R	R	R
ChrI	16.4	A	R	R	R	R	NA	R	R	R	R	R	NA	R	NA	R	R	R	R	R	NA	R	R	A	R	R	NA	R	A	R	R	A	R	R	A	A	NA	R	A	A	R	NA	R	NA	R	R	R	R	NA
ChrI	16.5	A	R	R	R	R	R	R	R	R	R	R	R	R	R	R	R	R	R	R	R	R	R	A	R	R	R	R	NA	R	R	A	R	R	A	A	R	R	A	A	R	R	R	R	R	R	R	R	R
ChrI	16.6	A	R	R	R	R	R	R	R	R	R	R	R	R	R	R	R	R	R	R	R	R	R	A	R	R	R	R	A	R	R	A	R	R	A	A	R	R	A	A	R	R	R	R	R	R	R	R	R
ChrI	16.7	A	R	R	R	R	R	R	R	R	R	R	R	R	R	R	R	R	R	R	R	R	R	A	R	R	R	R	NA	R	R	A	R	R	NA	A	R	R	A	A	R	R	R	R	R	R	R	R	R
ChrI	16.8	A	R	R	R	R	R	R	R	R	R	R	R	R	R	R	R	R	R	R	R	R	R	NA	R	R	R	R	A	R	R	A	R	R	A	A	R	R	A	A	R	R	R	R	R	R	R	R	R
ChrI	16.9	A	R	R	R	R	R	R	R	R	R	R	R	R	R	R	R	R	R	R	R	R	R	A	R	R	R	R	NA	R	R	A	R	R	A	A	R	R	A	A	R	R	R	R	R	R	R	R	R
ChrI	17	A	R	R	R	R	R	R	R	R	R	R	R	R	R	R	R	R	R	R	R	R	R	A	R	R	R	R	A	R	R	A	R	R	A	A	R	R	A	A	R	R	R	R	R	R	R	R	R
ChrI	17.1	A	R	R	R	R	R	R	R	R	R	R	R	R	R	R	R	R	R	R	R	R	R	A	R	R	R	R	A	R	R	A	R	R	A	A	R	R	A	A	R	R	R	R	R	R	R	R	R
ChrI	17.2	A	R	R	R	R	R	R	R	R	R	R	R	R	R	R	R	R	R	R	R	R	R	A	R	R	R	R	A	R	R	A	R	R	A	A	R	R	A	A	R	R	R	R	R	R	R	R	R
ChrI	17.3	A	R	R	R	R	R	R	R	R	R	R	R	R	NA	R	R	NA	R	R	NA	R	R	A	R	R	R	R	A	R	R	A	R	R	A	A	R	R	A	A	R	R	R	R	R	R	R	R	R
ChrI	17.4	A	R	R	R	R	R	R	R	R	R	R	R	R	R	R	R	R	R	R	R	R	R	NA	R	R	R	R	A	R	R	A	R	R	A	A	R	R	A	A	R	R	R	R	R	R	R	R	R
ChrI	17.5	A	R	R	R	R	R	R	R	R	R	R	R	R	R	NA	R	R	R	R	R	R	R	A	R	R	R	R	A	R	R	A	R	R	A	A	R	R	A	A	R	R	R	R	R	R	R	R	R
ChrI	17.6	A	R	R	R	R	R	R	R	R	R	R	R	R	R	R	R	R	R	R	R	R	R	NA	R	R	R	R	A	R	R	A	R	R	A	A	R	R	A	A	R	R	R	R	R	R	R	R	R
ChrI	17.7	A	R	R	R	R	R	R	R	R	R	R	R	R	R	R	R	R	R	R	R	R	R	A	R	R	R	R	A	R	R	A	R	R	A	A	R	R	A	A	R	R	R	R	R	R	R	R	R
ChrI	17.8	A	R	R	R	R	R	R	R	R	R	R	R	R	R	R	R	R	R	R	R	R	R	A	R	R	R	R	A	R	R	A	R	R	A	A	R	R	A	A	R	R	R	R	R	R	R	R	R
ChrI	17.9	A	R	R	R	R	R	R	R	R	R	R	R	R	R	R	R	R	R	R	R	R	R	NA	R	R	R	R	A	R	R	A	R	R	A	A	R	R	A	A	R	R	R	R	R	R	R	R	R
ChrI	18	A	R	R	R	R	R	R	R	R	R	R	R	R	R	R	R	R	R	R	R	R	R	A	R	R	R	R	A	R	R	A	R	R	A	A	R	R	A	A	R	R	R	R	R	R	R	R	R
ChrI	18.1	A	R	R	R	R	R	R	R	R	R	R	R	R	R	R	R	R	R	R	R	R	R	NA	R	R	R	R	A	R	R	A	R	R	A	A	R	R	A	A	R	R	R	R	R	R	R	R	R
ChrI	18.2	A	R	R	R	R	R	R	R	R	R	R	R	R	R	R	R	R	R	R	R	R	R	A	R	R	R	R	A	R	R	A	R	R	A	A	R	R	A	A	R	R	R	R	R	R	R	R	R
ChrI	18.3	A	R	R	R	R	R	R	R	R	R	R	R	R	R	R	R	R	R	R	R	R	R	A	R	R	R	R	A	R	R	A	R	R	A	A	R	R	A	NA	R	R	R	R	R	R	R	R	R
ChrI	18.4	A	R	R	R	R	R	R	R	R	R	R	R	R	R	R	R	R	R	R	R	R	R	A	R	R	R	R	A	R	R	A	R	R	NA	A	R	R	A	A	R	R	R	R	R	R	R	R	R
ChrI	18.5	A	R	R	R	R	R	R	R	R	R	R	R	R	R	R	R	R	R	R	R	R	R	A	R	R	R	R	A	R	R	A	R	R	NA	A	R	R	A	A	R	R	R	R	R	R	R	R	R
ChrI	18.6	A	R	R	R	R	R	R	R	R	R	R	R	R	R	R	R	R	R	R	R	R	R	A	R	R	R	R	NA	R	R	A	R	R	A	A	R	R	A	A	R	R	R	R	R	R	R	R	R
ChrI	18.7	A	R	R	R	R	R	R	R	R	R	R	R	R	R	R	R	R	R	R	R	R	R	NA	R	R	R	R	A	R	R	A	R	R	A	A	R	R	A	A	R	R	R	R	R	R	R	R	R
ChrI	18.8	A	R	R	R	R	R	R	R	R	R	R	R	R	R	R	R	R	R	R	R	R	R	A	R	R	R	R	A	R	R	A	R	R	A	A	R	R	A	A	R	R	R	R	R	R	R	R	R
ChrI	18.9	A	R	R	R	R	R	R	R	R	R	R	R	R	R	R	R	R	R	R	R	R	R	NA	R	R	R	R	A	R	R	A	R	R	NA	A	R	R	A	A	R	R	R	R	R	R	R	R	R
ChrI	19	A	R	R	R	R	R	R	R	R	R	R	R	R	R	R	R	R	R	R	R	R	R	NA	R	R	R	R	A	R	R	A	R	R	NA	A	R	R	A	A	R	R	R	R	R	R	R	R	R
ChrI	19.1	A	R	R	R	R	R	R	R	R	R	R	R	R	R	R	R	R	R	R	R	R	R	A	R	R	R	R	A	R	R	A	R	NA	A	A	R	R	A	A	R	R	R	R	R	R	R	R	R
ChrI	19.2	A	R	R	R	R	R	R	R	R	R	R	R	R	R	R	R	R	R	R	R	R	R	NA	R	R	R	R	A	R	R	A	R	R	NA	A	R	R	A	A	R	R	R	R	R	R	R	R	R
ChrI	19.3	A	R	R	R	R	R	R	R	R	R	R	R	R	R	R	R	R	R	R	R	R	R	A	R	R	R	NA	A	R	R	A	R	R	A	A	R	R	A	A	R	R	R	R	R	R	R	R	R
ChrI	19.4	A	R	R	R	R	R	R	R	R	R	R	R	R	R	R	R	R	R	R	R	R	R	A	R	R	R	R	A	R	R	A	R	R	A	A	R	R	A	A	R	R	R	R	R	R	R	R	R
ChrI	19.5	A	R	R	R	R	NA	R	R	R	R	NA	R	R	R	NA	R	NA	R	R	R	R	R	A	R	NA	NA	R	A	R	NA	A	R	R	A	NA	NA	R	A	A	R	NA	R	R	NA	R	NA	R	R
ChrI	19.6	A	R	R	R	R	R	R	R	R	R	R	R	R	R	R	R	R	R	R	R	R	R	A	R	R	R	R	A	R	R	A	R	R	NA	A	R	R	A	A	R	R	R	R	R	R	R	R	R
ChrI	19.7	A	R	R	R	R	R	R	R	R	R	R	R	R	R	R	R	R	R	R	R	R	R	A	R	R	R	R	A	R	R	A	R	R	A	A	R	R	A	A	R	R	R	R	R	R	R	R	R
ChrI	19.8	A	R	R	R	R	R	R	R	R	R	R	R	R	R	R	R	R	R	R	R	R	R	A	R	R	R	R	A	R	R	A	R	R	NA	A	R	R	A	A	R	R	R	R	R	R	R	R	R
ChrI	19.9	A	R	R	R	R	R	R	R	R	R	R	R	R	R	R	R	R	R	R	R	R	R	A	R	R	R	R	A	R	R	A	R	R	A	A	R	R	A	A	R	R	R	R	R	R	R	R	R
ChrI	20	A	R	R	R	R	R	NA	R	R	R	R	R	R	R	R	R	R	R	R	R	R	R	A	R	R	R	R	A	R	R	A	R	R	NA	A	R	R	A	A	R	R	R	R	R	R	R	R	R
ChrI	20.1	A	R	R	R	R	R	R	R	R	R	R	R	R	R	R	R	R	R	R	R	R	R	A	R	R	NA	R	A	R	R	A	R	R	NA	A	R	R	A	A	R	R	R	R	R	R	R	R	R
ChrI	20.2	A	R	R	R	R	R	R	R	R	R	R	R	R	R	R	R	R	R	R	R	R	R	A	R	R	R	R	A	R	R	A	R	R	A	A	R	R	A	A	R	R	R	R	R	R	R	R	R
ChrI	20.3	A	R	R	R	R	R	R	R	R	R	R	R	R	R	R	R	R	R	R	R	R	R	A	R	R	R	R	A	R	R	A	R	R	A	A	R	R	A	A	R	R	R	R	R	R	R	R	R
ChrI	20.4	A	R	R	R	R	R	R	R	R	R	R	R	R	R	R	R	R	R	R	NA	R	R	A	R	R	R	R	A	R	R	A	R	R	A	A	R	R	A	A	R	R	R	R	R	R	R	R	R
ChrI	20.5	A	R	R	R	R	R	R	R	R	R	R	R	R	R	R	R	R	R	R	NA	R	R	A	R	NA	R	R	A	R	R	A	R	R	A	A	R	R	A	A	R	R	R	R	R	R	R	R	R
ChrI	20.6	A	R	R	R	R	R	R	R	R	R	R	R	R	R	R	R	R	R	R	R	R	R	A	R	R	R	R	A	R	R	A	R	R	NA	A	R	R	A	A	R	R	R	R	R	R	R	R	R
ChrI	20.7	R	R	R	R	R	R	R	R	R	R	R	R	R	R	R	R	R	R	R	R	R	R	A	R	R	R	R	A	R	R	A	R	R	NA	A	R	R	A	A	R	R	R	R	R	R	R	R	R
ChrI	20.8	NA	NA	NA	R	R	NA	R	R	R	NA	NA	NA	R	R	NA	R	R	R	R	R	R	R	A	NA	R	R	R	A	R	R	A	R	R	NA	A	R	R	A	A	R	R	R	R	NA	R	R	R	R
ChrI	20.9	R	R	R	R	R	R	R	R	R	R	R	R	R	R	R	R	R	R	R	R	R	R	NA	R	R	R	R	NA	R	R	A	R	R	A	A	R	R	A	A	R	R	R	R	R	R	R	R	R
ChrI	21	R	R	R	R	R	R	R	R	R	R	R	R	R	R	R	R	R	R	R	R	R	R	A	R	R	R	R	A	R	R	A	R	R	A	A	R	R	A	A	R	R	R	R	R	R	R	R	R
ChrI	21.1	R	R	R	R	R	R	R	R	R	R	R	R	R	R	R	R	R	R	R	R	R	R	NA	R	R	R	R	NA	R	R	A	R	R	NA	A	R	R	A	A	R	R	R	R	R	R	R	R	R
ChrI	21.2	R	R	R	R	R	R	R	R	R	R	R	R	R	R	R	R	R	R	R	R	R	R	A	R	R	R	R	A	R	R	A	R	R	NA	A	R	R	A	A	R	R	R	R	R	R	R	R	R
ChrI	21.3	R	R	R	R	R	R	R	R	R	R	R	R	R	R	R	R	R	R	R	R	R	R	A	R	R	R	R	NA	R	R	A	R	R	NA	A	R	R	A	A	R	R	R	R	R	R	R	R	R
ChrI	21.4	R	R	R	R	R	R	R	R	R	R	R	R	R	R	R	R	R	R	R	R	R	R	A	R	R	R	R	A	R	R	A	R	R	NA	A	R	R	A	A	R	R	R	R	R	R	R	R	R
ChrI	21.5	R	R	R	R	R	R	R	R	R	R	R	R	R	R	R	R	R	R	R	R	R	R	A	R	R	R	R	A	R	R	A	R	R	A	A	R	R	A	A	R	R	R	R	R	R	R	R	R
ChrI	21.6	R	R	R	R	R	R	R	R	R	R	R	R	R	R	R	R	R	R	R	R	R	R	A	R	R	R	R	A	R	R	A	R	R	A	A	R	R	A	A	R	R	R	R	R	R	R	R	R
ChrI	21.7	R	R	R	R	R	R	R	R	R	R	R	R	R	R	R	R	R	R	R	R	R	R	A	R	R	R	R	A	R	R	A	R	R	A	A	R	R	A	A	R	R	R	R	R	R	R	R	R
ChrI	21.8	R	R	R	R	R	R	R	R	R	R	R	R	R	R	R	R	R	R	R	R	R	R	A	R	R	R	R	NA	R	R	A	R	R	A	A	R	R	A	A	R	R	R	R	R	R	R	R	R
ChrI	22	R	R	R	R	R	R	R	R	R	R	R	R	R	R	R	R	R	R	R	R	R	R	A	R	R	R	R	A	R	R	A	R	R	A	A	R	R	A	A	R	R	R	R	R	R	R	R	R
ChrI	22.1	R	R	R	R	R	R	R	R	R	R	R	R	R	R	R	R	R	R	R	R	R	R	A	R	R	R	R	NA	R	R	A	R	R	NA	A	R	R	A	A	R	R	R	R	R	R	R	R	R
ChrI	22.2	R	R	R	R	R	R	R	R	R	R	R	R	R	R	R	R	R	R	R	R	R	R	A	R	R	R	R	NA	R	R	A	R	R	A	A	R	R	A	A	R	R	R	R	R	R	R	R	R
ChrI	22.3	R	R	R	R	R	R	R	R	R	R	R	R	R	R	R	R	R	R	R	R	R	R	A	R	R	R	R	A	R	R	A	R	R	NA	A	R	R	A	A	R	R	R	R	R	R	R	R	R
ChrI	22.4	R	R	R	R	R	R	R	R	R	R	R	R	R	R	R	R	R	R	R	R	R	R	A	R	R	R	R	A	R	R	A	R	R	A	A	R	R	A	A	R	R	R	R	R	R	R	R	R
ChrI	22.5	R	R	R	R	R	R	R	R	R	R	R	R	R	R	R	R	R	R	R	R	R	R	A	R	R	R	R	A	R	R	A	R	R	NA	A	R	R	A	A	R	R	R	R	R	R	R	R	R
ChrI	22.6	R	R	R	R	R	R	R	R	R	R	R	R	R	R	R	R	R	R	R	R	R	R	A	R	R	R	R	NA	R	R	A	R	R	NA	A	R	R	A	A	R	R	R	R	R	R	R	R	R
ChrI	22.7	R	R	R	R	R	R	R	R	R	R	R	R	R	R	R	R	R	R	R	R	R	R	A	R	R	R	R	A	R	R	A	R	R	A	A	R	R	A	A	R	R	R	R	R	R	R	R	R
ChrI	22.9	R	R	R	R	R	R	R	R	R	R	R	R	R	R	R	R	R	R	R	R	R	R	A	R	R	R	R	A	R	R	A	R	R	A	A	R	R	A	A	R	R	R	R	R	R	R	R	R
ChrI	23	R	R	R	R	R	R	R	R	R	R	R	R	R	R	R	R	R	R	R	R	R	R	A	R	R	R	R	A	R	R	A	R	R	A	A	R	R	A	A	R	R	R	R	R	R	R	R	R
ChrI	23.1	R	R	R	R	R	R	R	R	R	R	R	R	R	R	R	R	R	R	R	R	R	R	A	R	R	R	R	A	R	R	A	R	R	NA	A	R	R	A	A	R	R	R	R	R	R	R	R	R
ChrI	23.2	R	NA	R	R	R	R	R	R	R	R	R	R	R	R	R	R	R	R	R	NA	R	NA	A	R	R	R	R	A	R	R	A	R	R	A	A	R	R	A	A	R	R	R	NA	R	R	R	R	R
ChrI	23.4	R	R	R	R	R	R	R	R	R	R	R	R	R	R	R	R	R	R	R	R	R	R	A	R	R	R	R	A	R	R	A	R	R	NA	A	R	R	A	A	R	R	R	R	R	R	R	R	R
ChrI	23.5	R	R	R	R	R	R	R	R	R	R	R	R	R	R	R	R	R	R	R	R	R	R	A	R	R	R	R	NA	R	R	A	R	R	NA	A	R	R	A	A	R	R	R	R	R	R	R	R	R
ChrI	23.6	R	R	R	R	R	R	R	R	R	R	R	R	R	R	R	R	R	R	R	R	R	R	NA	R	R	R	R	A	R	R	A	R	R	NA	A	R	R	A	A	R	R	R	R	R	R	R	R	R
ChrI	23.7	R	R	R	R	R	R	R	R	R	R	R	R	R	R	R	R	R	R	R	NA	R	R	A	R	R	R	R	A	R	R	A	R	R	A	A	R	R	A	A	R	R	R	R	R	R	R	R	R
ChrI	23.8	R	R	R	R	R	R	R	R	R	R	R	R	R	R	R	R	R	R	R	R	R	R	A	R	R	R	R	A	R	R	A	R	R	A	A	R	R	A	A	R	R	R	R	R	R	R	R	R
ChrI	23.9	R	R	R	R	R	R	R	R	R	R	R	R	R	R	NA	R	R	R	R	R	R	R	A	R	R	R	R	A	R	R	A	R	R	NA	A	R	R	A	A	R	R	R	R	R	R	R	R	R
ChrI	24	R	R	R	R	R	R	R	R	R	R	R	R	R	R	NA	R	R	R	R	R	R	R	A	R	R	R	R	A	R	R	A	R	R	NA	A	R	R	A	A	R	R	R	R	R	R	R	R	R
ChrI	24.1	R	R	R	R	R	R	R	R	R	R	R	R	R	R	R	R	R	R	R	R	R	R	A	R	R	R	R	A	R	R	A	R	R	A	A	R	R	A	A	R	R	R	R	R	R	R	R	R
ChrI	24.2	R	R	R	R	R	R	R	R	R	R	R	R	R	R	R	R	R	R	R	R	R	R	A	R	R	R	R	A	R	R	A	R	R	NA	A	R	R	A	A	R	R	R	R	R	R	R	R	R
ChrI	24.3	R	R	R	R	R	R	R	R	R	R	R	R	R	R	R	R	R	R	R	R	R	R	A	R	R	R	R	A	R	R	A	R	R	A	A	R	R	A	A	R	R	R	R	R	R	R	R	R
ChrI	24.4	R	R	R	R	R	R	R	R	R	R	R	R	R	R	R	R	R	R	R	R	R	R	A	R	R	R	R	A	R	R	A	R	R	A	A	R	R	A	A	R	R	R	R	R	R	R	R	R
ChrI	24.5	R	R	R	R	R	R	R	R	R	R	R	R	R	R	R	R	R	R	R	R	R	R	A	R	R	R	R	A	R	R	A	R	R	A	A	R	R	A	A	R	R	R	R	R	R	R	R	R
ChrI	24.6	R	R	R	R	R	R	R	R	R	R	R	R	R	R	R	R	R	R	R	R	R	R	A	R	R	R	R	A	R	R	A	R	R	NA	A	R	R	A	A	R	R	R	R	R	R	R	R	R
ChrI	24.7	R	R	R	R	R	R	R	R	R	R	R	R	R	R	R	R	R	R	R	R	R	R	A	R	R	R	R	A	R	R	A	R	R	NA	A	R	R	A	A	R	R	R	R	R	R	R	R	R
ChrI	24.8	R	R	R	R	R	R	R	R	R	R	R	R	R	R	R	R	R	R	R	R	R	R	A	R	R	R	R	A	R	R	A	R	R	A	A	R	R	A	A	R	R	R	R	R	R	R	R	R
ChrI	24.9	R	R	R	R	R	R	R	R	R	R	R	R	R	R	R	R	R	R	R	R	R	NA	A	R	R	R	R	A	R	R	A	R	R	A	A	R	R	A	A	R	R	R	R	R	R	R	R	R
ChrI	25	R	R	R	R	R	R	R	R	R	R	R	R	R	R	R	R	R	R	R	R	R	R	A	R	R	R	R	A	R	R	A	R	R	A	A	R	R	A	A	R	R	R	R	R	R	R	R	R
ChrI	25.1	R	R	R	R	R	R	R	R	R	R	R	R	R	R	R	R	R	R	R	R	R	R	A	R	R	R	R	A	R	R	A	R	R	A	A	R	R	A	A	R	R	R	R	R	R	R	R	R
ChrI	25.2	R	R	R	R	R	R	R	R	R	R	R	R	R	NA	R	R	R	R	R	R	R	R	A	R	R	R	R	A	R	NA	A	R	R	NA	A	R	R	A	A	R	R	R	R	R	R	R	R	R
ChrI	25.3	R	R	R	R	R	R	R	R	R	R	R	R	R	R	R	R	R	R	R	R	R	R	NA	R	R	R	R	NA	R	R	A	R	R	NA	A	R	R	A	A	R	R	R	R	R	R	R	R	R
ChrI	25.4	R	R	R	R	R	R	R	R	R	R	R	R	R	R	R	R	R	R	R	R	R	R	A	R	R	R	R	NA	R	R	A	R	R	A	A	R	R	A	A	R	R	R	R	R	R	R	R	R
ChrI	25.5	R	R	R	R	R	R	R	R	R	R	R	R	R	R	R	R	R	R	R	R	R	R	NA	R	R	R	R	NA	R	R	A	R	R	A	A	R	R	A	A	R	R	R	R	R	R	R	R	R
ChrI	25.6	R	R	R	R	R	R	R	R	R	R	R	R	R	R	R	R	R	R	R	NA	R	R	A	R	R	R	R	A	R	R	A	R	R	A	A	R	R	A	A	R	R	R	R	R	R	R	R	R
ChrI	25.7	R	R	R	R	R	R	R	R	R	R	R	R	R	R	R	R	R	R	R	R	R	R	A	R	R	R	R	A	R	R	A	R	R	A	A	R	R	A	A	R	R	R	R	R	R	R	R	R
ChrI	25.8	R	R	R	R	R	R	R	R	R	R	R	R	R	R	R	R	R	R	R	R	R	R	A	R	R	R	R	A	R	R	A	R	R	A	A	R	R	A	A	R	R	R	R	R	R	R	R	R
ChrI	25.9	R	R	R	R	R	R	R	R	R	R	R	R	R	R	R	R	R	R	R	R	R	R	A	R	R	R	R	A	R	R	A	R	R	NA	A	R	R	A	A	R	R	R	R	R	R	R	R	R
ChrI	26	R	R	R	R	R	R	R	R	R	R	R	R	R	R	R	R	R	R	R	R	R	R	A	R	R	R	R	A	R	R	A	R	R	A	A	R	R	A	A	R	R	R	R	R	R	R	R	R
ChrI	26.1	R	R	R	R	R	R	R	R	R	R	R	R	R	R	R	R	R	R	R	R	R	R	A	R	R	R	R	A	R	R	A	R	R	NA	A	R	R	A	A	R	R	R	R	R	R	R	R	R
ChrI	26.2	R	R	R	R	R	R	R	R	R	R	R	R	R	R	R	R	R	R	R	R	R	R	A	R	R	R	R	A	R	R	A	R	R	NA	A	R	R	A	A	R	R	R	R	R	R	R	R	R
ChrI	26.3	R	R	R	R	R	R	R	R	R	R	R	R	R	R	R	R	R	R	R	R	R	R	A	R	R	R	R	A	R	R	A	R	R	NA	A	R	R	A	A	R	R	R	R	R	R	R	R	R
ChrI	26.4	R	R	R	R	R	R	R	R	R	R	R	R	R	R	R	R	R	R	R	R	R	R	A	R	R	R	R	A	R	R	A	R	R	A	A	R	R	A	A	R	R	R	R	R	R	R	R	R
ChrI	26.5	R	R	R	R	R	R	R	R	R	R	R	R	R	R	R	R	R	R	R	R	R	R	A	R	R	R	R	A	R	R	A	R	R	A	A	R	R	A	A	R	R	R	R	R	R	R	R	R
ChrI	26.6	R	R	R	R	R	R	R	R	R	R	R	R	R	R	R	R	R	R	R	R	R	R	A	R	R	R	R	NA	R	R	A	R	R	A	A	R	R	A	A	R	R	R	R	R	R	R	R	R
ChrI	26.7	R	R	R	R	R	R	R	R	R	R	R	R	R	R	R	R	R	R	R	R	R	R	A	R	R	R	R	A	R	R	A	R	R	NA	A	R	R	A	A	R	R	R	R	R	R	R	R	R
ChrI	26.8	R	R	R	R	R	R	R	R	R	R	R	R	R	R	R	R	R	R	R	R	R	R	A	R	R	R	R	NA	R	R	A	R	R	NA	A	R	R	A	A	R	R	R	R	R	R	R	NA	R
ChrI	26.9	R	R	R	R	R	R	R	R	R	R	R	R	R	R	R	R	R	R	R	R	R	R	A	R	R	R	R	NA	R	R	A	R	R	NA	A	R	R	A	A	R	R	R	R	R	R	R	A	R
ChrI	27	R	R	R	R	R	R	R	R	R	R	R	R	R	R	R	R	R	R	R	R	R	R	A	R	R	R	R	NA	R	R	A	R	R	A	A	R	R	A	A	R	R	R	R	R	R	R	A	R
ChrI	27.1	R	R	R	R	R	R	R	R	R	R	R	R	R	R	R	R	R	R	R	R	R	R	NA	R	R	R	R	NA	R	R	A	R	R	NA	A	R	R	A	A	R	R	R	R	R	R	R	A	R
ChrI	27.2	R	R	R	R	R	R	R	R	R	R	R	R	R	R	R	R	R	R	R	R	R	R	NA	R	R	R	R	A	R	R	A	R	R	A	A	R	R	A	A	R	R	R	R	R	R	R	A	R
ChrI	27.3	R	R	R	R	R	R	R	R	R	R	R	R	R	R	R	R	R	R	R	R	R	R	A	R	R	R	R	A	R	R	A	R	R	A	A	R	R	A	A	R	R	R	R	R	R	R	A	R
ChrI	27.4	R	R	R	R	R	R	R	R	R	R	R	R	R	R	R	R	NA	R	R	R	R	R	A	R	R	R	R	A	R	R	A	R	R	A	A	R	R	A	A	R	R	R	R	R	R	R	A	R
ChrI	27.5	R	R	R	R	R	R	NA	R	R	R	R	NA	R	R	R	R	R	R	R	NA	R	R	A	NA	NA	R	NA	A	R	R	A	R	R	A	A	R	R	A	A	R	R	R	R	R	R	R	A	NA
ChrI	27.6	R	R	R	R	R	R	R	R	R	R	R	R	R	R	R	R	R	R	R	R	R	R	A	R	R	R	R	A	R	R	A	R	R	NA	A	R	R	A	A	R	R	R	R	R	R	R	A	R
ChrI	27.7	R	R	R	R	R	R	R	R	R	R	R	R	R	R	R	R	R	R	R	R	R	R	NA	R	R	R	R	NA	R	R	A	R	R	NA	A	R	R	A	A	R	R	R	R	R	R	R	A	R
ChrI	27.8	R	R	R	R	R	R	R	R	R	R	R	R	R	R	R	R	R	R	R	R	R	R	A	R	R	R	R	A	R	R	A	R	R	NA	A	R	R	A	A	R	R	R	R	R	R	R	A	R
ChrI	27.9	R	R	R	R	R	R	R	R	R	R	R	R	R	R	R	R	R	R	R	R	R	R	NA	R	R	R	R	NA	R	R	A	R	R	A	A	R	R	A	A	R	R	R	R	R	R	R	A	R
ChrI	28	R	R	R	R	R	R	R	R	R	R	R	R	R	R	R	R	R	R	R	R	R	R	A	R	NA	R	R	A	R	R	A	R	R	A	A	R	R	A	A	R	R	R	R	R	R	R	A	R
ChrI	28.1	R	R	R	R	R	R	R	R	R	R	R	R	R	R	R	R	NA	R	R	R	R	R	A	R	R	R	R	A	R	R	A	R	R	A	A	R	R	A	A	R	R	R	R	R	R	R	A	R
ChrI	28.2	R	R	R	R	R	R	R	R	R	R	R	R	R	R	NA	R	R	R	R	R	R	R	A	R	R	R	R	NA	R	R	A	R	R	NA	A	R	R	A	A	R	R	R	R	R	R	R	A	R
ChrI	28.3	R	R	R	R	R	R	R	R	R	R	R	R	R	R	R	R	R	R	R	R	R	R	A	R	R	R	R	A	R	R	A	R	R	NA	A	R	R	A	A	R	R	R	R	R	R	R	A	R
ChrI	28.4	R	R	R	R	R	R	R	R	R	R	R	R	R	R	R	R	R	R	R	R	R	R	A	R	R	R	R	NA	R	R	A	R	R	NA	A	R	R	A	A	R	R	R	R	R	R	R	A	R
ChrI	28.5	R	R	R	R	R	R	R	R	R	R	R	R	R	R	R	R	R	R	R	R	R	R	A	R	R	R	R	A	R	R	A	R	R	A	A	R	R	A	A	R	R	R	R	R	R	R	A	R
ChrI	28.6	R	R	R	R	R	R	R	R	R	R	R	R	R	R	R	R	R	R	R	R	R	R	A	R	R	R	R	NA	R	R	A	R	R	A	A	R	R	A	A	R	R	R	R	R	R	R	A	R
ChrI	28.7	R	R	R	R	R	R	R	R	R	R	R	R	R	R	R	R	R	R	R	R	R	R	A	R	R	R	R	A	R	R	A	R	R	NA	A	R	R	A	A	R	R	R	R	R	R	R	A	R
ChrI	28.8	R	R	R	R	R	R	R	R	R	R	R	R	R	R	NA	R	R	R	R	R	R	R	A	R	R	R	R	A	R	R	A	R	R	A	A	R	R	A	A	R	R	R	R	R	R	R	A	R
ChrI	28.9	R	R	R	R	R	R	R	R	R	R	R	R	R	R	R	R	R	R	R	R	R	R	A	R	R	R	R	A	R	R	A	R	R	A	A	R	R	A	A	R	R	R	R	R	R	R	A	R
ChrI	29	R	R	R	R	R	R	R	R	R	R	R	R	R	R	R	R	R	R	R	R	R	R	A	R	R	R	R	A	R	R	A	R	R	A	A	R	R	A	A	R	R	R	R	R	R	R	A	R
ChrI	29.1	R	R	R	R	R	NA	R	R	R	R	R	R	R	R	NA	R	R	R	R	R	R	R	A	R	R	R	R	A	R	R	A	R	R	A	A	R	R	A	A	R	R	R	R	R	R	NA	A	R
ChrI	29.2	R	R	R	R	R	R	R	R	R	R	R	R	R	R	R	R	R	R	R	R	R	R	A	R	R	R	R	A	R	R	A	R	R	A	A	R	R	A	A	R	R	R	R	R	R	R	A	R
ChrI	29.3	R	R	R	R	R	R	R	R	R	R	R	R	R	R	R	R	R	R	R	R	R	R	A	R	R	R	R	A	R	R	A	R	R	A	A	R	R	A	A	R	R	R	R	R	R	R	A	R
ChrI	29.4	R	R	R	R	R	R	R	R	R	R	R	R	R	R	R	R	R	R	R	R	R	R	A	R	R	R	R	A	R	R	A	R	R	A	A	R	R	A	A	R	R	R	R	R	R	R	A	R
ChrI	29.5	R	R	R	R	R	R	R	R	R	R	R	R	R	R	R	R	R	R	R	R	R	R	NA	R	R	R	R	A	R	R	A	R	R	A	A	R	R	A	A	R	R	R	R	R	R	R	A	R
ChrI	29.6	R	R	R	R	R	R	R	R	R	R	R	R	R	R	R	R	R	R	R	R	R	R	NA	R	R	R	R	A	R	R	A	R	R	A	A	R	R	A	A	R	R	R	R	R	R	R	A	R
ChrI	29.7	R	R	R	R	R	R	R	R	R	R	R	R	R	R	R	R	R	R	R	R	R	R	NA	R	R	R	R	NA	R	R	A	R	R	A	A	R	R	A	A	R	R	R	R	R	R	R	NA	R
ChrI	29.8	R	R	R	R	R	R	R	R	R	R	R	R	R	R	R	R	R	R	R	R	R	R	NA	R	R	R	R	NA	R	R	A	R	R	A	A	R	R	A	A	R	R	R	R	R	R	R	NA	R
ChrI	29.9	R	R	R	R	R	R	R	R	R	R	R	R	R	R	R	R	R	R	R	R	R	R	A	R	R	R	R	NA	R	R	A	R	R	A	A	R	R	A	A	R	R	R	R	R	R	R	NA	R
ChrI	30	R	R	R	R	R	R	R	R	R	R	R	R	R	R	R	R	R	R	R	R	R	R	A	R	R	R	R	A	R	R	A	R	R	A	A	R	R	A	A	R	R	R	R	R	R	R	A	R
ChrI	30.1	R	R	R	R	R	R	R	R	R	R	R	R	R	R	R	R	R	R	R	R	R	R	A	R	R	R	R	NA	R	R	A	R	R	A	A	R	R	A	A	R	R	R	R	R	R	R	A	R
ChrI	30.2	R	R	R	R	R	R	R	R	R	R	R	R	R	R	R	R	R	R	R	R	R	R	A	R	R	R	R	A	R	R	A	R	R	A	A	R	R	A	A	R	R	R	R	R	R	R	A	R
ChrI	30.3	NA	R	R	R	R	R	R	R	R	R	R	R	R	R	R	R	R	R	R	R	R	R	A	R	R	R	R	A	R	R	A	R	R	NA	A	R	R	A	A	R	R	R	R	R	R	R	A	R
ChrI	30.4	R	R	R	R	R	R	R	R	R	R	R	R	R	R	R	R	R	R	R	R	R	R	A	R	R	R	R	A	R	R	A	R	R	A	A	R	R	A	A	R	R	R	R	R	R	R	A	R
ChrI	30.5	R	R	R	R	R	R	R	R	R	R	R	R	R	R	R	R	R	R	R	R	R	R	NA	R	R	R	R	A	R	R	A	R	R	NA	A	R	R	A	A	R	R	R	R	R	R	R	A	R
ChrI	30.6	R	R	R	R	R	R	R	R	R	R	R	R	R	R	R	R	R	R	R	R	R	R	A	R	R	R	R	A	R	R	A	R	R	NA	R	R	R	A	A	R	R	R	R	R	R	R	A	R
ChrI	30.7	R	R	R	R	R	R	R	R	R	R	R	R	R	R	R	R	R	R	R	R	R	R	A	R	R	R	R	A	R	R	A	R	R	A	R	R	R	A	A	R	R	R	R	R	R	R	A	R
ChrI	30.8	R	R	R	R	R	R	R	R	R	R	R	R	R	R	R	R	R	R	R	R	R	R	NA	R	R	R	R	A	R	R	A	R	R	NA	R	R	R	A	A	R	R	R	R	R	R	R	A	R
ChrI	30.9	R	R	R	R	R	R	R	R	R	R	R	R	R	R	R	R	R	R	R	R	R	R	A	R	R	R	R	A	R	R	A	R	R	A	R	R	R	A	A	R	R	R	R	R	R	R	A	R
ChrI	31	R	R	R	R	R	R	R	R	R	R	R	R	R	R	R	R	R	R	R	R	R	R	A	R	R	R	R	A	R	R	A	R	R	A	R	R	R	A	A	R	R	R	R	R	R	R	NA	R
ChrI	31.1	R	R	R	R	R	R	R	R	R	R	R	R	R	R	R	R	R	R	R	R	R	R	A	R	R	R	R	A	R	R	A	R	R	A	R	R	R	A	A	R	R	R	R	R	R	R	A	R
ChrI	31.2	R	R	R	R	R	R	R	R	R	R	R	R	R	R	R	R	R	R	R	R	R	R	A	R	R	R	R	NA	R	R	A	R	R	NA	R	R	R	A	A	R	R	R	R	R	R	R	A	R
ChrI	31.3	R	R	R	R	R	R	R	R	R	R	R	R	R	R	R	R	R	R	R	R	R	R	NA	R	R	R	R	A	R	R	A	R	R	A	R	R	R	A	A	R	R	R	R	R	R	R	A	R
ChrI	31.4	R	R	R	R	R	R	R	R	R	R	R	R	R	R	R	R	R	R	R	R	R	R	NA	R	R	R	R	A	R	R	A	R	R	A	R	R	R	A	A	R	R	R	R	R	R	R	NA	R
ChrI	31.5	R	R	R	R	R	R	R	R	R	R	R	R	R	R	R	R	R	R	R	R	R	R	NA	R	R	R	R	A	R	R	A	R	R	A	R	R	R	A	A	R	R	R	R	R	R	R	A	R
ChrI	31.6	R	R	R	R	R	R	R	R	R	R	R	R	R	R	R	R	R	R	R	R	R	R	A	R	R	R	R	A	R	R	A	R	R	A	R	R	R	A	A	R	R	R	R	R	R	R	A	R
ChrI	31.7	R	R	R	R	R	R	R	R	R	R	R	R	R	R	R	R	R	R	R	R	R	R	A	R	R	R	R	A	R	R	A	R	R	NA	R	R	R	A	A	R	R	R	R	R	R	R	A	R
ChrI	31.8	R	R	R	R	R	R	R	R	R	R	R	R	R	R	R	R	R	R	R	R	R	R	A	R	R	R	R	A	R	R	A	R	R	A	R	R	R	A	A	R	R	R	R	R	R	R	A	R
ChrI	31.9	R	R	R	R	R	R	R	R	R	R	R	R	R	R	R	R	R	R	R	R	R	R	A	R	R	R	R	A	R	R	A	R	R	A	R	R	R	A	A	R	R	R	R	R	R	R	A	R
ChrI	32	R	R	R	R	R	R	R	R	R	R	R	R	R	R	R	R	R	R	R	NA	R	R	A	R	R	R	R	A	R	R	A	R	R	A	R	R	R	A	A	R	R	R	R	R	R	R	A	R
ChrI	32.1	R	R	R	R	R	R	R	R	R	R	R	R	R	R	R	R	R	R	R	R	R	R	A	R	R	R	R	NA	R	R	A	R	R	NA	R	R	R	A	A	R	R	R	R	R	R	R	A	R
ChrI	32.2	R	R	R	R	R	R	R	R	R	R	R	R	R	R	R	R	R	R	R	R	R	R	A	R	R	R	R	A	R	R	A	R	R	A	R	R	R	A	A	R	R	R	R	R	R	R	A	R
ChrI	32.3	R	R	R	R	R	R	R	R	R	R	R	R	R	R	R	R	R	R	R	R	R	R	NA	R	R	R	R	A	R	R	A	R	R	A	R	R	R	A	A	R	R	R	R	R	R	R	A	R
ChrI	32.4	R	R	R	R	R	R	R	R	R	R	R	R	R	R	R	R	R	R	R	R	R	R	NA	R	R	R	R	NA	R	R	A	R	R	A	R	R	R	A	A	R	R	R	R	R	R	R	A	R
ChrI	32.5	R	R	R	R	R	R	R	R	R	R	R	R	R	R	R	R	R	R	R	R	R	R	A	R	R	R	R	A	R	R	A	R	R	A	R	R	R	A	A	R	R	R	R	R	R	R	A	R
ChrI	32.6	R	R	R	R	R	R	R	R	R	R	R	R	R	R	NA	R	R	R	R	R	R	R	A	R	R	R	NA	A	R	R	A	R	R	A	R	R	R	A	A	R	R	R	R	R	R	R	A	R
ChrI	32.7	R	R	R	R	R	R	R	R	R	R	R	R	R	R	R	R	R	R	R	R	R	R	A	R	R	R	NA	A	R	R	A	R	R	R	R	R	R	A	A	R	R	R	R	R	R	R	NA	R
ChrI	32.8	R	R	R	R	R	R	R	R	R	R	R	R	R	R	R	R	R	R	R	R	R	R	A	R	R	R	R	NA	R	R	A	R	R	R	R	R	R	NA	A	R	R	R	R	R	R	R	R	R
ChrI	32.9	R	R	R	R	R	R	R	R	R	R	R	R	R	NA	R	R	R	R	R	R	R	R	A	R	R	R	R	NA	R	R	A	R	R	R	R	R	R	A	A	R	R	R	R	R	R	R	R	R
ChrI	33	R	R	R	R	R	R	R	R	R	R	R	R	R	R	R	R	R	R	R	R	R	R	A	R	R	R	R	R	R	R	A	R	R	R	R	R	R	A	A	R	R	R	R	R	R	R	R	R
ChrI	33.1	R	R	R	R	R	R	R	R	R	R	R	R	R	R	NA	R	R	R	R	R	R	R	A	R	R	R	R	R	R	R	A	R	R	R	R	R	R	A	A	R	R	R	R	R	R	R	R	R
ChrI	33.2	R	R	R	R	R	R	R	R	R	R	R	R	R	R	R	R	R	R	R	R	R	R	A	R	R	R	R	R	R	R	A	R	R	R	R	R	R	A	A	R	R	R	R	R	R	R	R	R
ChrI	33.3	R	R	R	R	R	R	R	R	R	R	R	R	R	R	R	R	R	R	R	R	R	R	A	R	R	R	R	R	R	R	A	R	R	R	R	R	R	A	A	R	R	R	R	R	R	R	R	R
ChrI	33.4	R	R	R	R	R	R	R	R	R	R	R	R	R	R	NA	R	R	R	R	R	R	R	NA	R	R	R	R	R	R	R	A	R	R	R	R	R	R	A	A	R	R	R	R	R	R	R	R	R
ChrI	33.5	R	R	R	R	R	R	R	R	R	R	R	R	R	R	R	R	R	R	R	R	R	R	A	R	R	R	R	R	R	R	A	R	R	R	R	R	R	A	A	R	R	R	R	R	R	R	R	R
ChrI	33.6	R	R	R	R	R	R	R	R	R	R	R	R	R	R	R	R	R	R	R	R	R	R	NA	R	R	R	R	R	R	R	A	R	R	R	R	R	R	A	A	R	R	R	R	R	R	R	R	R
ChrI	33.7	R	R	R	R	R	R	R	R	R	R	R	R	R	R	R	R	R	R	R	R	R	R	A	R	R	R	R	R	R	R	A	R	R	R	R	R	R	A	A	R	R	R	R	R	R	R	R	R
ChrI	33.8	R	R	R	R	R	R	R	R	R	R	R	R	R	R	R	R	R	R	R	R	R	R	A	R	R	R	R	R	R	R	A	R	R	R	R	R	R	A	A	R	R	R	R	R	R	R	R	R
ChrI	33.9	R	R	R	R	R	R	R	R	R	R	R	R	R	R	R	R	R	R	R	R	R	R	A	R	R	R	R	R	R	R	A	R	R	R	R	R	R	A	A	R	R	R	R	R	R	R	R	R
ChrI	34	R	R	R	R	R	R	R	R	R	R	R	R	R	R	R	R	R	R	R	R	R	R	A	R	R	R	R	R	R	R	A	R	R	R	R	R	R	A	A	R	R	R	R	R	R	R	R	R
ChrI	34.1	R	R	R	R	R	R	R	R	R	R	R	R	R	R	R	R	R	R	R	R	R	R	NA	R	R	R	R	R	R	R	A	R	R	R	R	R	R	A	A	R	R	R	R	R	R	R	R	R
ChrI	34.2	R	R	R	R	R	R	R	R	R	R	R	R	R	R	R	R	R	R	R	R	R	R	A	R	R	R	R	R	R	R	A	R	R	R	R	R	R	A	A	R	R	R	R	R	R	R	R	R
ChrI	34.3	R	R	R	R	R	R	R	R	R	R	R	R	R	R	R	R	R	R	R	R	R	R	A	R	R	R	R	R	R	R	A	R	R	R	R	R	R	A	A	R	R	R	R	R	R	NA	R	R
ChrI	34.4	R	R	R	R	R	R	R	R	R	R	R	R	R	R	R	R	R	R	R	R	R	R	A	R	R	R	R	R	R	R	A	R	R	NA	R	R	R	A	A	R	R	R	R	R	R	R	R	R
ChrI	34.5	R	R	R	R	R	R	R	R	R	R	R	R	R	R	R	R	R	R	R	R	R	R	A	R	R	R	R	R	R	R	A	R	R	R	R	R	R	A	A	R	R	R	R	R	R	R	R	R
ChrI	34.6	R	R	R	R	R	R	R	R	R	R	R	R	R	R	R	R	R	R	R	R	R	R	A	R	R	R	R	R	R	R	A	R	R	R	R	R	R	A	A	R	R	R	R	R	R	R	R	R
ChrI	34.7	R	R	R	R	R	R	NA	R	R	R	R	R	R	R	R	R	R	R	R	NA	R	R	NA	R	R	R	R	R	R	R	NA	R	R	R	R	R	R	NA	A	R	R	R	R	R	R	R	R	R
ChrI	34.8	R	R	R	R	R	R	R	R	R	R	R	R	R	R	R	R	R	R	R	R	R	R	A	R	R	R	R	R	R	R	A	R	R	R	R	R	R	A	A	R	R	R	R	R	R	R	R	R
ChrI	34.9	R	R	R	R	R	R	A	R	R	R	R	R	R	R	NA	R	R	R	R	R	R	R	A	R	R	R	R	R	R	R	A	R	R	R	R	R	R	A	A	R	R	R	R	R	R	R	R	R
ChrI	35	R	R	R	R	R	R	A	R	R	R	R	R	R	R	R	R	R	R	R	R	R	R	A	R	R	R	R	R	R	R	A	R	R	R	R	R	R	A	A	R	R	R	R	R	R	R	R	R
ChrI	35.1	R	R	R	R	R	R	A	R	R	R	R	R	R	R	R	R	R	R	R	R	R	R	A	R	R	R	R	R	R	R	A	R	R	R	R	R	R	A	A	R	R	R	R	R	R	R	R	R
ChrI	35.2	R	R	R	R	R	R	NA	R	R	R	R	R	R	R	R	R	R	R	R	R	R	R	NA	R	R	R	R	R	R	R	A	R	R	R	R	R	R	A	A	R	R	R	R	R	R	R	R	R
ChrI	35.3	R	R	R	R	R	R	A	R	R	R	R	R	R	R	R	R	R	R	R	R	NA	R	NA	R	R	R	R	R	R	R	A	R	R	R	R	R	R	A	A	R	R	R	R	R	R	R	R	R
ChrI	35.4	R	R	R	R	R	R	A	R	R	R	R	R	R	R	R	R	R	R	R	R	R	R	NA	R	R	R	R	R	R	R	A	R	R	R	R	R	R	A	A	R	R	R	R	R	R	R	R	R
ChrI	35.5	R	R	R	R	R	R	A	R	R	R	R	R	R	R	R	R	R	R	R	R	R	R	A	R	R	R	R	R	R	R	A	R	R	R	R	R	R	A	A	R	R	R	R	R	R	R	R	R
ChrI	35.6	R	R	R	R	R	R	A	R	R	R	R	R	R	R	R	R	R	R	R	R	R	R	A	R	R	R	R	R	R	R	A	R	R	R	R	R	R	A	A	R	R	R	R	R	R	R	R	R
ChrI	35.7	R	R	R	R	R	R	A	R	R	R	R	R	R	R	R	R	R	R	R	R	R	R	A	R	R	R	R	R	R	R	A	R	NA	R	R	R	R	A	A	R	R	R	NA	R	R	R	R	R
ChrI	35.8	R	R	R	R	NA	R	NA	R	R	R	R	R	R	R	R	R	R	R	R	R	R	R	NA	R	R	R	R	R	R	R	A	R	A	R	R	R	R	A	A	R	R	R	R	R	R	R	R	R
ChrI	35.9	R	R	R	R	NA	R	A	R	R	R	R	R	R	R	R	R	R	R	R	R	R	R	R	R	R	R	R	R	R	A	A	R	A	R	R	R	R	A	A	R	R	R	R	R	R	R	R	R
ChrI	36.1	R	R	R	R	A	R	A	R	R	R	R	R	R	R	R	R	R	R	R	R	R	R	R	R	R	R	R	R	R	A	A	R	A	R	R	R	R	A	A	R	R	R	R	R	R	R	R	R
ChrI	36.2	R	R	R	R	A	R	A	R	R	R	R	R	R	R	R	R	R	R	R	R	R	R	R	R	R	R	R	R	R	A	A	R	A	R	R	R	R	A	A	R	R	R	R	R	R	R	R	R
ChrI	36.3	R	R	R	R	A	R	A	R	R	R	R	R	R	R	R	R	R	R	R	R	R	R	R	R	R	R	R	R	R	A	A	R	A	R	R	R	R	A	A	R	R	R	R	R	R	R	R	R
ChrI	36.4	R	R	R	R	A	R	A	R	R	R	R	R	R	R	R	R	NA	R	R	R	R	R	R	R	R	R	R	R	R	A	A	R	A	R	R	R	R	A	A	R	R	R	R	R	R	R	R	R
ChrI	36.5	R	R	R	R	A	R	A	R	R	R	R	R	R	R	R	R	R	R	R	R	R	R	R	R	R	R	R	R	R	A	A	R	NA	R	R	R	R	A	A	R	R	R	R	R	R	R	R	R
ChrI	36.6	R	R	R	R	A	R	A	R	R	R	R	R	R	R	R	R	R	R	R	R	NA	R	R	R	R	R	R	R	R	A	A	R	A	R	R	R	R	A	A	R	R	R	R	R	R	R	NA	R
ChrI	36.7	R	R	R	R	A	R	A	R	R	R	R	R	R	R	R	R	R	NA	R	R	R	R	R	R	R	R	NA	R	R	A	A	R	A	R	R	R	R	A	A	R	R	R	R	R	R	R	R	R
ChrI	37	R	R	R	R	NA	R	A	R	R	R	R	R	R	R	R	R	R	NA	R	R	R	R	R	R	R	R	R	R	R	A	A	R	NA	R	R	R	R	A	A	R	R	R	R	R	R	R	R	R
ChrI	37.3	R	R	R	R	A	R	A	R	R	R	R	R	R	R	R	R	R	A	R	R	R	R	R	R	R	R	R	R	R	A	A	R	A	R	R	R	R	A	A	R	R	R	R	R	R	R	R	R
ChrI	37.4	R	R	R	R	A	R	NA	R	R	R	R	R	R	R	R	R	R	A	R	R	R	R	R	R	R	R	R	R	R	A	NA	R	A	R	R	R	R	A	A	R	R	R	R	R	R	R	R	R
ChrI	37.5	R	R	R	R	A	R	NA	R	R	R	R	R	R	R	R	R	R	A	R	R	R	R	R	R	R	R	R	R	R	A	A	R	A	R	R	R	R	A	A	R	R	R	R	R	R	R	R	R
ChrI	37.6	R	R	R	R	A	R	A	R	R	R	R	R	R	R	R	R	R	NA	R	R	R	R	R	R	R	R	R	R	R	A	A	R	A	R	R	R	R	A	A	R	R	R	R	R	R	R	R	R
ChrI	37.7	R	R	R	R	A	R	A	R	R	R	R	R	R	R	R	R	R	A	R	R	R	R	R	R	R	R	R	R	R	A	A	R	A	R	R	R	R	A	A	R	R	R	R	R	R	R	R	R
ChrI	37.8	R	R	R	R	A	R	A	R	R	R	R	R	R	R	R	R	R	NA	R	R	R	R	R	R	R	NA	R	R	R	A	A	R	A	R	R	R	R	A	A	R	R	R	R	R	R	R	R	R
ChrI	37.9	R	R	R	R	A	R	A	R	R	R	R	R	R	R	R	R	R	A	R	R	R	R	R	R	R	R	R	R	R	A	A	R	NA	R	R	R	R	A	A	R	R	R	R	R	R	R	R	R
ChrI	38	R	R	R	R	A	R	A	R	R	R	R	R	R	R	R	R	R	A	R	R	R	R	R	R	R	R	R	R	R	A	A	R	NA	R	R	R	R	A	A	R	R	R	R	R	R	R	R	R
ChrI	38.1	R	R	R	R	A	R	A	R	R	R	R	R	R	R	R	R	R	A	R	R	R	R	R	R	R	R	R	R	R	A	A	R	A	R	R	R	R	A	A	R	R	R	R	R	R	R	R	R
ChrI	38.2	R	R	R	R	NA	R	A	R	R	R	R	R	R	R	R	R	R	NA	R	R	R	R	R	R	R	R	R	R	R	A	A	R	A	R	R	R	R	A	A	R	R	R	R	R	R	R	R	R
ChrI	38.4	R	R	R	R	A	R	A	R	R	R	R	R	R	R	R	R	R	A	R	R	R	R	R	R	R	R	R	R	R	A	A	R	NA	R	R	R	R	A	A	R	R	R	R	R	R	R	R	R
ChrI	38.5	R	R	R	R	A	R	A	R	R	R	R	R	R	R	R	R	R	A	R	R	R	R	R	R	R	R	R	R	R	A	A	R	NA	R	R	R	R	A	A	R	R	R	R	R	R	R	R	R
ChrI	38.6	R	R	R	R	A	R	A	R	R	R	R	R	R	R	R	R	R	A	R	R	R	R	R	R	R	R	R	R	R	A	A	R	A	R	R	R	R	A	A	R	R	R	R	R	R	R	R	R
ChrI	38.8	R	R	R	R	A	R	A	R	R	R	R	R	R	R	R	R	R	A	R	R	R	R	R	R	R	R	R	R	R	A	A	R	A	R	R	R	R	A	A	R	R	R	R	R	R	R	R	R
ChrI	38.9	R	R	R	R	A	R	A	R	R	R	R	R	R	R	R	R	R	A	R	R	R	R	R	R	R	R	R	R	R	A	A	R	A	R	R	R	R	A	A	R	R	R	R	R	R	R	R	R
ChrI	39.1	R	R	R	R	A	R	A	R	R	R	R	R	R	NA	R	NA	R	A	R	R	R	R	R	R	R	R	R	R	R	A	A	R	A	NA	R	R	R	A	A	R	R	R	R	R	R	R	R	R
ChrI	39.2	R	R	R	R	NA	R	NA	R	R	R	R	R	R	R	R	R	R	A	R	R	R	R	R	R	R	R	R	R	R	A	A	R	A	R	R	R	R	A	A	R	R	R	R	R	R	R	R	R
ChrI	39.3	R	R	R	R	NA	R	NA	R	R	R	R	R	R	R	R	R	R	A	R	R	R	R	R	R	R	R	R	R	R	A	A	R	NA	R	R	R	R	A	A	R	R	R	R	R	R	R	R	R
ChrI	39.4	R	R	R	R	A	R	A	R	R	R	R	R	R	R	R	R	R	A	R	R	R	R	R	R	R	R	R	R	R	A	A	R	A	R	R	R	R	A	A	R	R	R	R	R	R	R	R	R
ChrI	39.5	R	R	R	R	A	R	A	R	R	R	R	R	R	R	R	R	R	A	R	R	R	R	R	R	R	R	R	R	R	A	A	R	A	NA	R	R	R	A	A	R	R	R	R	R	R	R	R	R
ChrII	0.1	R	R	R	R	R	R	R	R	R	R	R	R	A	R	R	R	R	R	A	R	R	R	R	R	R	A	R	R	A	R	R	R	A	R	A	NA	A	R	R	A	R	A	R	R	R	R	R	R
ChrII	0.2	R	R	R	R	R	R	R	R	R	R	R	R	A	R	R	R	R	R	A	R	R	R	R	R	NA	A	R	R	A	R	R	R	A	NA	A	A	A	R	R	A	R	NA	R	R	R	R	R	R
ChrII	0.3	R	R	R	R	R	R	R	R	R	R	R	R	A	R	R	R	R	R	NA	R	R	R	R	R	R	A	R	R	A	R	R	R	A	R	A	A	A	R	R	NA	R	NA	R	R	R	R	R	R
ChrII	0.5	R	R	R	R	R	R	R	R	R	R	R	R	A	R	R	R	R	R	NA	R	R	R	R	R	R	A	R	R	NA	R	R	R	NA	R	A	NA	A	R	R	A	R	NA	R	R	R	R	R	R
ChrII	0.6	R	R	R	R	R	R	R	R	R	R	R	R	A	R	R	R	R	R	A	R	R	R	R	R	R	A	R	R	A	R	R	R	NA	R	A	A	A	R	R	A	R	A	R	R	R	R	R	R
ChrII	0.7	R	R	R	R	R	R	R	R	R	R	R	R	A	R	R	R	R	R	NA	R	R	R	R	R	R	A	R	R	A	R	R	R	NA	R	A	NA	A	R	R	NA	R	A	R	R	R	R	R	R
ChrII	0.8	R	R	R	R	R	R	R	R	R	R	R	R	A	R	R	R	R	R	NA	R	R	R	R	R	R	A	R	R	NA	R	R	R	NA	R	A	A	NA	R	R	NA	R	NA	R	R	R	R	R	R
ChrII	0.9	R	R	R	R	R	R	R	R	R	R	R	R	A	R	R	R	R	NA	NA	R	R	R	R	R	R	A	R	R	A	R	R	R	NA	R	A	A	A	R	R	A	R	A	R	R	R	R	R	R
ChrII	1	R	R	R	R	R	R	R	R	R	R	R	R	A	R	R	R	R	R	A	R	R	R	NA	R	R	A	R	R	A	R	R	R	A	R	A	A	A	R	R	A	R	A	R	R	R	R	R	R
ChrII	1.1	R	R	R	R	R	R	R	R	R	R	R	R	A	R	R	R	R	R	A	R	R	R	R	R	R	A	R	R	A	R	R	R	NA	R	A	NA	A	R	R	A	R	A	R	R	R	R	R	R
ChrII	1.2	R	R	R	R	R	R	R	R	R	R	R	R	A	R	R	R	R	R	A	R	NA	R	R	R	R	A	R	R	A	R	R	R	A	R	A	A	A	R	R	A	R	A	R	R	R	R	R	R
ChrII	1.3	R	R	R	R	R	R	R	R	R	R	R	R	A	R	R	R	R	R	NA	R	R	R	R	R	R	A	R	R	NA	R	R	R	A	R	A	NA	A	R	R	A	R	A	R	R	R	R	R	R
ChrII	1.4	R	R	R	R	R	R	R	R	R	R	R	R	A	R	R	R	R	R	A	R	R	R	R	R	R	A	R	R	A	R	R	R	A	R	A	A	A	R	R	A	R	A	R	R	R	R	R	R
ChrII	1.5	R	R	R	R	R	R	R	R	R	R	R	R	A	R	R	R	R	R	A	R	R	R	R	R	R	A	R	R	A	R	R	R	NA	R	A	A	A	R	R	A	R	A	R	R	R	R	R	R
ChrII	1.6	R	R	R	R	R	R	R	R	R	R	R	R	A	R	R	R	R	R	A	R	R	R	R	R	R	A	R	R	A	R	R	R	NA	R	A	NA	A	R	R	A	R	A	R	R	R	R	R	R
ChrII	1.7	R	R	R	R	R	R	R	R	R	R	R	R	A	R	R	R	R	R	NA	R	R	R	R	R	R	A	R	R	NA	R	R	R	NA	R	A	NA	NA	R	R	NA	R	A	R	R	R	R	R	R
ChrII	1.8	R	R	R	R	R	R	R	R	R	R	R	R	R	R	R	R	R	R	NA	R	R	R	R	R	R	A	R	R	NA	NA	R	R	NA	R	A	NA	A	R	R	NA	R	A	R	R	R	R	R	R
ChrII	1.9	R	R	R	R	R	R	R	R	R	R	R	R	R	R	R	R	R	R	A	R	R	R	R	R	R	A	R	R	A	A	R	R	A	R	A	A	A	R	R	A	R	A	R	R	R	R	R	R
ChrII	2	R	R	R	R	R	R	R	R	R	R	R	R	R	R	R	R	NA	R	A	R	R	R	R	R	R	A	R	R	NA	A	R	R	NA	R	A	NA	A	R	R	NA	R	NA	R	R	R	R	R	R
ChrII	2.1	R	R	R	R	R	R	R	R	R	R	R	R	R	R	R	R	R	R	A	R	R	R	R	R	R	A	R	R	A	A	R	R	A	R	A	A	A	R	R	A	R	A	R	R	R	R	R	R
ChrII	2.2	R	R	R	R	R	R	R	R	R	R	R	NA	R	R	R	R	R	R	A	R	R	R	R	R	R	A	R	R	A	A	R	R	A	R	A	NA	A	R	R	A	R	A	R	R	R	R	R	NA
ChrII	2.3	R	R	R	R	R	R	R	R	R	R	R	R	R	R	R	R	NA	R	A	R	R	R	R	R	R	A	R	R	A	A	R	R	NA	R	A	NA	A	R	R	NA	R	A	R	R	R	R	R	R
ChrII	2.5	R	R	R	R	R	R	R	R	R	R	R	R	R	R	R	R	R	R	A	NA	R	R	R	R	R	NA	R	R	A	A	R	R	A	R	A	A	A	R	R	A	R	A	R	R	R	R	R	R
ChrII	2.6	R	R	R	R	R	R	R	R	R	R	R	R	R	R	R	R	R	R	A	R	R	R	R	R	R	A	R	R	A	A	R	R	NA	R	A	NA	A	R	R	A	R	NA	R	R	R	R	R	R
ChrII	2.7	R	R	R	R	R	R	R	R	R	R	R	R	R	R	R	R	R	R	A	R	R	R	R	R	R	A	R	R	A	A	R	R	A	R	A	A	A	R	R	A	R	R	R	R	R	R	R	R
ChrII	2.8	R	R	R	R	R	R	R	R	R	R	R	R	R	R	R	R	R	R	A	R	R	R	R	R	R	A	R	R	A	A	R	R	NA	R	A	A	A	R	R	NA	R	R	R	R	R	R	R	R
ChrII	3	R	R	R	R	R	R	R	R	R	R	R	R	R	R	R	R	R	R	A	R	R	R	R	R	R	A	R	R	A	A	R	R	NA	R	A	A	A	R	R	A	R	R	R	R	R	R	R	R
ChrII	3.1	R	R	R	R	R	R	R	R	R	R	R	R	R	R	R	R	R	R	A	R	R	R	R	R	R	A	R	R	A	A	R	R	NA	R	A	A	A	R	R	A	R	R	R	R	R	R	R	R
ChrII	3.2	R	R	R	R	R	R	NA	R	R	R	R	R	R	R	R	R	NA	R	A	R	NA	R	R	R	NA	A	R	R	A	A	R	R	NA	NA	A	NA	A	R	R	NA	R	R	R	R	R	R	R	R
ChrII	3.3	R	R	R	R	R	R	R	R	R	R	R	R	R	R	R	R	R	R	A	R	R	R	R	R	R	A	R	R	A	A	R	R	A	R	A	A	A	R	R	A	R	R	R	R	R	R	R	R
ChrII	3.4	R	R	R	R	R	R	R	R	R	R	R	R	R	R	R	R	R	R	A	R	R	R	R	R	R	A	R	R	A	A	R	R	NA	R	A	A	A	R	R	A	R	R	R	R	R	R	R	R
ChrII	3.5	R	R	R	R	R	R	R	R	R	R	R	R	R	R	R	R	R	R	A	R	R	R	R	R	R	A	R	R	A	A	R	R	A	R	A	NA	A	R	R	A	R	R	R	R	R	R	R	R
ChrII	3.6	R	R	R	R	R	R	R	R	R	R	R	R	R	R	R	R	R	R	NA	R	R	R	R	R	R	A	R	R	A	A	R	R	NA	R	A	NA	A	R	R	A	R	R	R	R	R	R	R	R
ChrII	3.7	R	R	R	R	R	R	R	R	R	R	R	R	R	R	R	R	R	R	A	R	R	R	R	R	R	A	R	R	NA	A	R	R	A	R	A	A	A	R	R	A	R	R	R	R	R	R	R	R
ChrII	3.8	R	R	R	R	R	R	R	R	R	R	R	R	R	R	R	R	R	R	NA	R	R	R	R	R	R	A	R	R	A	A	R	R	NA	R	A	A	A	R	R	A	R	R	R	R	R	R	R	R
ChrII	3.9	R	R	R	R	R	R	R	R	R	R	R	R	R	R	R	R	R	R	NA	R	R	R	R	R	R	A	R	R	NA	NA	R	R	NA	NA	A	NA	A	R	R	A	R	R	R	R	R	R	R	R
ChrII	4	R	R	R	R	R	R	R	R	R	R	R	R	R	R	R	R	R	R	NA	R	R	R	R	R	R	A	R	R	NA	A	R	R	NA	R	A	NA	A	R	R	A	R	R	R	R	R	R	R	R
ChrII	4.1	R	R	R	R	R	R	R	R	R	R	R	R	R	R	R	R	R	R	A	R	R	R	R	R	R	A	R	R	NA	A	R	R	A	R	A	NA	A	R	R	A	R	R	R	R	R	R	R	R
ChrII	4.2	R	R	R	R	R	R	R	R	R	R	R	R	R	R	R	R	R	R	A	R	R	R	R	R	R	A	R	R	A	A	R	R	A	R	A	A	A	R	R	A	R	R	R	R	R	R	R	R
ChrII	4.3	R	R	R	R	R	R	R	R	R	R	R	R	R	R	R	R	R	R	A	R	R	R	R	R	R	A	R	R	A	A	R	R	A	R	A	A	A	R	R	A	R	R	R	R	R	R	R	R
ChrII	4.4	R	R	R	R	R	R	R	R	R	R	R	R	R	R	R	R	R	R	A	R	R	R	R	R	R	A	R	R	A	A	R	R	NA	R	A	NA	A	R	R	A	R	R	R	R	R	R	R	R
ChrII	4.5	R	R	R	R	R	R	R	R	R	R	R	R	R	R	R	R	R	R	A	R	R	R	R	R	R	A	R	R	A	A	R	R	NA	R	A	A	A	R	R	A	R	R	R	R	R	R	R	R
ChrII	4.6	R	R	R	R	R	R	R	R	R	R	R	R	R	R	R	R	R	R	A	R	R	R	R	R	R	A	R	R	A	A	R	R	NA	R	A	A	A	R	R	A	R	R	R	R	R	R	R	R
ChrII	4.7	R	R	R	R	R	R	R	R	R	R	R	R	R	R	R	R	R	R	A	R	R	R	R	R	R	A	R	R	NA	A	R	R	NA	R	A	NA	A	R	R	A	R	R	R	R	R	R	R	R
ChrII	4.8	R	R	R	R	R	R	R	R	R	R	R	R	R	R	R	R	R	R	A	R	R	R	R	R	R	A	R	R	A	A	R	R	NA	R	A	A	A	R	R	A	R	R	R	R	R	R	R	R
ChrII	4.9	R	R	R	R	R	R	R	R	R	R	R	R	R	R	R	R	R	R	A	R	R	R	R	R	R	A	R	R	NA	A	R	R	A	R	R	A	A	R	R	A	R	R	R	R	R	R	R	R
ChrII	5	R	R	R	R	R	R	R	R	R	R	R	R	R	R	R	R	A	R	A	R	R	R	R	R	R	A	NA	R	A	A	R	R	A	R	R	A	A	R	R	A	R	R	R	R	R	R	R	R
ChrII	5.1	R	R	R	R	R	R	R	R	R	R	R	R	R	R	R	R	A	R	NA	R	R	R	R	R	R	NA	R	R	NA	NA	R	R	A	R	R	NA	A	R	R	A	R	R	R	R	R	R	R	R
ChrII	5.2	R	R	R	R	R	R	R	R	R	R	R	R	R	R	R	R	A	R	A	R	R	R	R	R	R	A	R	R	A	A	R	R	NA	R	R	A	A	R	R	A	R	R	R	R	R	R	R	R
ChrII	5.3	R	R	R	R	R	R	R	R	R	R	R	R	R	R	R	R	A	R	A	NA	R	R	R	R	R	A	R	R	A	A	R	R	A	R	R	A	A	R	R	A	R	R	R	R	R	R	R	R
ChrII	5.4	R	R	R	R	R	R	R	R	R	R	R	R	R	R	R	R	A	R	NA	R	R	R	R	R	R	A	R	R	NA	A	R	R	A	R	R	NA	A	R	R	A	R	R	R	R	R	R	R	R
ChrII	5.5	R	R	R	R	R	R	R	R	R	R	R	R	R	R	R	R	A	R	A	R	R	R	R	R	R	A	R	R	A	A	R	R	NA	R	R	A	A	R	R	A	R	R	R	R	R	R	R	R
ChrII	5.6	R	R	R	R	R	R	R	R	R	R	R	R	R	R	R	R	A	R	A	R	R	R	R	R	R	A	R	R	A	A	R	R	A	R	R	A	A	R	R	A	R	R	R	R	R	R	R	R
ChrII	5.8	R	R	R	R	R	R	R	R	R	R	R	R	R	R	R	R	A	R	NA	R	R	R	R	R	R	A	R	R	A	NA	R	R	NA	R	R	NA	A	R	R	A	R	R	R	R	R	R	R	R
ChrII	5.9	R	R	R	R	R	R	R	R	R	R	R	R	R	R	R	R	A	R	A	R	R	R	R	R	R	A	R	R	NA	A	R	R	NA	R	R	A	A	R	R	A	R	R	R	R	R	R	R	R
ChrII	6	R	R	R	R	R	R	R	R	R	R	R	R	R	R	R	R	A	R	A	R	R	R	R	R	R	A	R	R	A	A	R	R	A	R	R	NA	A	R	NA	A	R	R	R	R	R	R	R	R
ChrII	6.1	R	R	R	R	R	R	R	R	R	R	R	R	R	R	R	R	NA	R	NA	R	R	R	R	R	R	A	R	R	NA	A	R	R	NA	R	R	NA	NA	R	R	A	R	R	R	R	R	R	R	R
ChrII	6.2	R	R	R	R	R	R	NA	R	R	R	R	R	NA	R	R	R	A	R	A	NA	R	R	R	R	R	A	R	R	A	A	R	R	A	R	NA	A	A	R	R	A	R	R	R	R	R	R	R	R
ChrII	6.3	R	R	R	R	R	R	R	R	R	R	R	R	R	R	R	R	A	R	A	R	R	R	R	R	R	A	R	R	A	A	R	NA	NA	R	R	A	A	R	R	A	R	R	R	R	R	R	R	R
ChrII	6.4	R	R	R	R	R	R	R	R	R	R	R	R	R	R	R	R	A	R	A	R	R	R	R	R	R	A	R	R	A	A	R	A	R	R	R	A	A	R	R	A	R	R	R	R	R	R	R	R
ChrII	6.5	R	R	R	R	R	R	R	R	R	R	R	R	R	R	R	R	A	R	A	R	R	R	R	R	R	A	R	R	NA	A	R	A	R	R	R	NA	A	R	R	A	R	R	R	R	R	R	R	R
ChrII	6.6	R	R	R	R	R	R	R	R	R	R	R	R	R	R	R	R	A	R	A	R	R	R	R	R	R	NA	R	R	A	A	R	A	R	R	R	A	A	R	R	A	R	R	R	R	NA	R	R	R
ChrII	6.7	R	R	R	R	R	R	R	R	R	R	R	R	R	R	R	R	A	R	A	R	R	R	R	R	R	A	R	R	A	A	R	A	R	R	R	A	A	R	R	A	R	R	R	R	R	R	R	R
ChrII	6.8	R	R	R	R	R	R	R	R	R	R	R	R	R	R	R	R	A	R	A	R	R	R	R	R	R	A	R	R	A	A	R	A	R	R	R	A	A	R	R	A	R	R	R	R	R	R	R	R
ChrII	6.9	R	R	R	R	R	R	R	R	R	R	R	R	R	R	R	R	A	R	A	R	R	R	R	R	R	A	R	R	A	A	R	A	R	R	R	NA	A	R	R	A	R	R	R	R	R	R	R	R
ChrII	7	R	R	R	R	R	R	R	R	R	R	R	R	R	R	R	R	A	R	NA	R	R	R	R	R	R	A	R	R	A	A	R	NA	R	R	R	NA	A	R	R	A	R	R	R	R	R	R	R	R
ChrII	7.1	R	R	R	R	R	R	R	R	R	R	R	R	R	R	R	R	A	R	A	R	R	R	R	R	R	A	R	R	A	A	R	A	R	R	R	A	A	R	R	A	R	R	R	R	R	R	R	R
ChrII	7.2	R	R	R	R	R	R	R	R	R	R	R	R	R	R	R	R	A	R	NA	R	R	R	R	R	R	A	R	R	A	A	R	A	R	R	R	NA	A	R	R	A	R	R	R	R	R	R	R	R
ChrII	7.3	R	R	R	R	R	R	R	R	R	R	R	R	R	R	R	R	A	R	NA	R	R	R	R	R	R	A	R	R	A	A	R	A	R	NA	R	NA	A	R	R	A	R	R	R	R	R	R	R	R
ChrII	7.4	R	R	R	R	R	R	R	R	R	R	R	R	R	R	R	R	A	R	NA	R	R	R	R	R	R	A	R	R	NA	A	R	A	NA	R	R	NA	A	R	R	A	R	R	R	R	R	R	R	R
ChrII	7.5	R	R	R	R	R	R	R	R	R	R	R	R	R	R	R	R	A	R	A	R	R	R	R	R	R	A	R	R	NA	A	R	A	R	R	R	A	A	R	R	A	R	R	R	R	R	R	R	R
ChrII	7.6	R	R	R	R	R	R	R	R	R	R	R	R	R	R	R	R	A	R	A	R	R	R	R	R	R	A	R	R	NA	A	R	NA	R	R	R	A	A	R	R	A	R	R	R	R	R	R	R	R
ChrII	7.7	R	R	R	R	R	R	R	NA	R	R	R	R	R	R	R	R	A	R	A	R	R	R	R	R	R	A	R	R	A	A	R	A	R	R	R	A	A	R	R	A	R	R	R	R	R	R	R	R
ChrII	7.8	R	R	R	R	R	R	R	R	R	R	R	R	R	R	R	R	A	R	A	R	R	R	R	R	R	A	R	R	NA	A	R	A	R	R	R	NA	A	R	R	A	R	R	R	R	R	R	R	R
ChrII	7.9	R	R	R	R	R	R	R	R	R	R	R	R	R	R	R	R	A	R	A	R	R	R	R	R	R	A	R	R	A	A	R	NA	R	R	R	NA	A	R	R	A	R	R	R	R	R	R	R	R
ChrII	8	R	R	R	R	R	R	R	R	R	R	R	R	R	R	R	R	A	R	A	R	R	R	R	R	R	A	R	R	A	A	R	A	R	R	R	A	A	R	R	A	R	R	R	R	R	R	R	R
ChrII	8.1	R	R	R	R	R	R	R	R	R	R	R	R	R	R	R	R	NA	R	A	R	R	R	R	R	R	A	R	R	A	A	R	A	R	R	R	NA	A	R	R	A	R	R	R	R	R	R	R	R
ChrII	8.2	R	R	R	R	R	R	R	R	R	R	R	R	R	R	R	R	A	R	A	R	R	R	R	R	R	A	R	R	NA	A	R	NA	R	R	R	NA	A	R	R	A	R	R	R	R	R	R	R	R
ChrII	8.3	R	R	R	R	R	R	R	R	R	R	R	R	R	R	R	R	A	R	A	R	R	R	R	R	R	A	R	R	NA	A	R	A	R	R	R	NA	A	R	R	A	R	R	R	R	R	R	R	R
ChrII	8.4	R	R	R	R	R	R	R	R	R	R	R	R	R	R	R	R	A	R	A	R	R	R	R	R	R	A	R	R	A	A	R	A	R	R	R	A	A	R	R	A	R	R	R	R	R	R	R	R
ChrII	8.5	R	R	R	R	R	R	R	R	R	R	R	R	R	R	R	R	A	R	A	R	R	R	R	R	R	A	R	R	A	A	R	A	R	R	R	A	A	R	R	A	R	R	R	R	R	R	R	R
ChrII	8.6	R	R	R	R	R	R	R	R	R	R	R	R	R	R	R	R	A	R	A	R	R	R	R	R	R	A	R	R	A	A	R	A	R	R	R	NA	A	R	R	A	R	R	R	R	R	R	R	R
ChrII	8.7	R	R	R	R	R	R	R	R	R	R	R	R	R	R	R	R	A	R	A	R	R	R	R	R	R	A	R	R	NA	A	R	A	R	R	R	A	A	R	R	A	R	R	R	R	R	R	R	R
ChrII	8.8	R	R	R	R	R	R	R	R	R	R	R	R	R	R	R	R	A	R	A	R	R	R	R	R	R	A	R	R	A	A	R	A	R	R	R	A	A	R	R	A	R	R	R	R	R	R	R	R
ChrII	8.9	R	R	R	R	R	R	R	R	R	R	R	R	R	R	R	R	A	R	A	R	R	R	R	R	R	A	R	R	NA	A	R	A	R	R	R	A	A	R	R	A	R	R	R	R	R	R	R	R
ChrII	9	R	R	R	R	R	R	R	R	R	R	R	R	R	R	R	R	A	R	A	R	R	R	R	R	R	A	R	R	A	A	R	A	R	R	R	NA	A	R	R	A	R	R	R	R	R	R	R	R
ChrII	9.1	R	R	R	R	R	R	R	R	R	R	R	R	R	R	R	R	A	R	NA	R	R	R	R	R	R	A	R	R	A	A	R	A	R	R	R	NA	A	R	R	A	R	R	R	R	R	R	R	R
ChrII	9.2	R	R	R	R	R	R	R	R	R	R	R	R	R	R	R	R	A	R	A	R	R	R	R	R	R	A	R	R	A	A	R	NA	R	R	R	A	A	R	R	A	R	R	R	R	R	R	R	R
ChrII	9.3	R	R	R	R	R	R	R	R	R	R	R	R	R	R	R	R	A	R	A	R	R	R	R	R	R	A	R	R	A	A	R	A	R	R	R	A	A	R	R	A	R	R	R	R	R	R	R	R
ChrII	9.4	R	R	R	R	R	R	R	R	R	R	R	R	R	R	R	R	A	R	A	R	R	R	R	R	R	A	R	R	A	A	R	A	R	R	R	A	A	R	R	A	R	R	R	R	R	R	R	R
ChrII	9.5	R	R	R	R	R	R	R	R	R	R	R	R	R	R	R	R	A	R	A	R	R	R	R	R	R	A	R	R	A	A	R	A	R	R	R	A	A	R	R	A	R	R	R	R	R	R	R	R
ChrII	9.6	R	R	R	R	R	R	R	R	R	R	R	R	R	R	R	R	A	R	A	R	R	R	R	R	R	A	R	R	A	A	R	A	R	R	R	A	A	R	R	A	R	R	R	R	R	R	R	R
ChrII	9.7	R	R	R	R	R	R	R	R	R	R	R	R	R	R	R	R	A	R	A	R	R	R	R	R	R	A	R	R	A	A	R	A	R	R	R	A	A	R	R	A	R	R	R	R	R	R	R	R
ChrII	9.8	R	R	R	R	R	R	R	R	R	R	R	R	R	R	R	R	A	R	A	R	NA	R	R	R	R	A	R	R	A	A	R	A	R	R	R	A	A	R	R	A	R	R	R	R	R	R	R	R
ChrII	9.9	R	R	R	R	R	R	R	R	R	R	R	R	R	R	R	R	A	R	A	R	R	R	R	R	NA	A	R	R	A	A	R	A	R	R	R	A	A	R	R	A	R	R	R	R	R	R	R	R
ChrII	10	R	R	R	R	R	R	R	R	R	R	R	R	R	R	R	R	A	R	A	R	NA	R	R	R	R	A	R	R	A	A	R	A	R	R	R	A	A	R	R	A	R	R	R	R	R	R	R	R
ChrII	10.1	R	R	R	R	R	R	R	R	R	R	R	R	R	R	R	R	A	R	A	R	R	R	R	R	R	A	R	R	A	A	R	A	R	R	R	A	A	R	R	A	R	R	R	R	R	R	R	R
ChrII	10.2	R	R	R	R	R	R	R	R	R	R	R	R	R	R	R	R	A	R	A	R	R	R	R	R	R	A	R	R	A	A	R	A	R	R	R	A	A	R	R	A	R	R	R	R	R	R	R	R
ChrII	10.3	R	R	R	R	R	R	R	R	R	R	R	R	R	R	R	R	A	R	A	R	R	R	R	R	R	A	R	R	A	A	R	A	R	R	R	NA	A	R	R	A	R	R	R	R	R	R	R	R
ChrII	10.4	R	R	R	R	R	R	R	R	R	R	R	R	R	R	R	R	NA	R	NA	R	R	R	R	R	R	NA	R	R	NA	A	R	NA	R	R	R	NA	A	R	R	A	R	R	R	R	R	R	R	R
ChrII	10.5	R	R	R	R	R	R	R	R	R	R	R	R	R	R	R	R	A	R	A	R	R	R	R	R	R	A	R	R	A	A	R	A	R	R	R	A	A	R	R	A	R	R	R	R	R	R	R	R
ChrII	10.6	R	R	R	R	R	R	R	R	R	R	R	R	R	R	R	R	A	R	A	R	R	R	R	R	R	A	R	R	A	A	R	A	R	R	R	A	A	R	R	A	R	R	R	R	R	R	R	R
ChrII	10.7	R	R	R	R	R	R	R	R	R	R	R	R	R	R	R	R	A	R	A	R	R	R	R	R	R	A	R	R	A	A	R	A	R	R	R	A	A	R	R	A	R	R	R	R	R	R	R	R
ChrII	10.8	R	R	R	R	R	R	R	R	R	R	R	R	R	NA	R	R	A	R	NA	R	R	R	R	R	R	A	R	R	NA	A	R	A	R	R	R	NA	NA	R	R	A	R	R	R	R	R	R	R	R
ChrII	10.9	R	R	R	R	R	R	R	R	R	R	R	R	R	R	R	R	A	R	NA	R	R	R	R	R	R	A	R	R	NA	A	R	NA	R	R	R	NA	A	R	R	A	R	R	R	R	R	R	R	R
ChrII	11.1	R	R	R	R	R	R	R	R	R	R	R	R	R	R	R	R	A	R	A	R	R	R	R	R	R	NA	R	R	A	A	R	NA	R	R	R	NA	A	R	R	A	R	R	R	R	R	R	R	R
ChrII	11.2	R	R	R	R	R	R	R	R	R	R	R	R	R	R	R	R	A	R	A	R	R	R	R	R	R	A	NA	R	A	A	R	A	R	R	R	A	A	R	R	A	R	R	R	R	R	R	R	R
ChrII	11.3	R	R	R	R	R	NA	NA	R	R	R	R	NA	R	R	R	R	NA	R	A	R	R	R	R	R	NA	A	NA	R	A	A	R	A	NA	R	NA	NA	A	R	R	NA	R	R	R	R	NA	R	NA	NA
ChrII	11.4	R	R	R	R	R	R	R	R	R	R	R	R	R	R	R	R	A	R	A	NA	R	R	R	R	R	A	R	R	A	A	R	A	NA	R	R	A	A	R	R	A	R	R	R	R	R	R	R	R
ChrII	11.5	R	R	R	R	R	R	R	R	R	R	R	R	R	NA	R	R	A	R	NA	R	R	R	R	R	R	A	R	R	NA	A	R	NA	R	R	R	NA	A	R	R	A	R	R	R	R	R	R	R	R
ChrII	11.6	R	R	R	R	R	R	R	R	R	R	R	R	R	R	R	R	A	R	A	R	R	R	R	R	R	A	R	R	A	A	R	A	R	R	R	NA	A	R	R	A	R	R	R	R	R	R	R	R
ChrII	11.7	R	R	R	R	R	R	R	R	R	R	R	R	R	R	R	R	A	R	NA	R	R	R	R	R	R	A	R	R	A	A	R	A	R	R	R	NA	A	R	R	A	R	R	R	R	R	R	R	R
ChrII	11.8	R	R	R	R	R	R	R	R	R	R	R	R	R	R	R	R	A	R	A	R	R	R	R	R	R	A	R	R	A	A	R	A	R	R	R	A	A	R	R	A	R	R	R	R	R	R	R	R
ChrII	11.9	R	R	R	R	R	R	R	R	R	R	R	R	R	R	R	R	A	R	A	R	R	R	R	R	R	A	R	R	A	A	R	A	R	R	R	A	A	R	R	A	R	R	R	R	R	R	R	R
ChrII	12	R	R	R	R	R	R	R	R	R	R	R	R	R	R	R	R	A	R	NA	R	R	R	R	R	R	A	R	R	A	A	R	A	R	R	R	NA	A	R	R	A	R	R	R	R	R	R	R	R
ChrII	12.1	R	R	R	R	R	R	R	R	R	R	R	R	R	R	R	R	A	R	A	R	R	R	R	R	R	A	R	R	NA	A	R	A	R	R	R	NA	A	R	R	A	R	R	R	R	R	R	R	R
ChrII	12.2	R	R	R	R	R	R	R	R	R	R	R	R	R	R	R	R	A	R	A	R	R	R	R	R	R	A	R	NA	A	A	R	A	R	R	R	A	A	R	R	A	R	R	R	R	R	R	R	R
ChrII	12.3	R	R	R	R	R	R	R	R	R	R	R	R	R	R	R	R	A	R	A	NA	NA	R	NA	R	R	A	R	R	A	A	R	A	R	R	R	A	A	R	R	A	R	R	R	R	R	R	R	R
ChrII	12.4	R	R	R	R	R	R	R	R	R	R	R	R	R	R	R	R	A	R	A	R	R	R	R	R	R	A	R	R	A	A	R	A	R	R	R	A	A	R	R	A	R	R	R	R	R	R	R	R
ChrII	12.5	R	R	R	R	R	R	R	R	R	R	R	R	R	R	R	R	A	R	A	R	R	R	R	R	R	A	NA	R	A	A	R	A	R	R	R	A	A	R	R	A	R	R	R	R	R	R	R	R
ChrII	12.6	R	R	R	R	R	R	R	R	R	R	R	R	R	R	R	R	A	R	A	R	R	R	R	R	R	A	R	R	A	A	R	NA	R	R	R	NA	A	R	R	A	R	R	R	R	R	R	R	R
ChrII	12.7	R	R	R	R	R	R	R	R	R	R	R	R	R	R	R	R	NA	R	NA	R	R	R	R	R	R	NA	R	R	A	NA	R	NA	R	R	R	NA	A	R	R	A	R	R	R	R	R	R	R	R
ChrII	12.8	R	R	R	R	R	R	R	R	R	R	R	R	R	R	R	R	A	R	NA	R	R	R	R	R	R	A	R	R	NA	A	R	A	R	R	R	NA	A	R	R	A	R	R	R	R	R	R	R	R
ChrII	12.9	R	R	R	R	R	R	R	R	R	R	R	R	R	R	R	R	NA	R	A	R	R	R	R	R	R	A	R	R	NA	A	R	A	R	R	R	NA	A	R	R	A	R	R	R	R	R	R	R	R
ChrII	13	R	R	R	R	R	R	R	R	R	R	R	R	R	R	NA	R	A	R	NA	R	R	R	NA	R	R	A	R	R	A	A	R	A	NA	R	R	NA	A	R	R	A	R	R	R	R	R	R	R	R
ChrII	13.1	R	R	R	R	R	R	R	R	R	R	R	R	R	R	R	R	A	R	NA	R	R	R	R	R	R	A	R	R	NA	A	R	A	R	R	R	NA	A	R	R	A	R	R	R	R	R	R	R	R
ChrII	13.3	R	R	R	R	R	R	R	R	R	R	R	R	R	R	R	R	A	R	A	R	R	R	R	R	R	A	R	R	NA	A	R	NA	R	R	R	NA	A	R	R	A	R	R	R	R	R	R	R	R
ChrII	13.4	R	R	R	R	R	R	R	R	R	R	R	R	R	R	R	R	A	R	NA	R	R	R	R	R	R	A	R	R	NA	A	R	A	R	R	R	NA	A	R	R	A	R	R	R	R	R	R	R	R
ChrII	13.5	R	R	R	R	R	R	R	R	R	R	R	R	R	R	R	R	A	R	A	R	R	R	R	R	R	A	R	R	A	A	R	A	R	R	R	A	A	R	R	A	R	R	R	R	R	R	R	R
ChrII	13.6	R	R	R	R	R	R	R	R	R	R	R	R	R	R	R	R	A	R	A	R	R	R	R	R	R	A	R	R	A	A	R	A	R	R	R	A	A	R	R	A	R	R	R	R	R	R	R	R
ChrII	13.7	R	R	R	R	R	R	R	R	R	R	R	R	R	R	R	R	A	R	A	R	R	R	R	R	R	A	R	R	NA	A	R	A	R	R	R	NA	A	R	R	A	R	R	R	R	R	R	R	R
ChrII	13.8	R	R	R	R	R	R	R	R	R	R	R	R	R	R	R	R	A	R	A	R	R	R	R	R	R	A	R	R	A	A	R	A	R	R	R	NA	A	R	R	A	R	R	R	R	R	R	R	R
ChrII	13.9	R	R	R	R	R	R	R	R	R	R	R	R	R	R	R	R	A	R	A	R	R	R	R	R	R	A	R	R	A	A	R	NA	R	R	R	A	A	R	R	A	R	R	R	R	R	R	R	R
ChrII	14	R	R	R	R	R	R	R	R	R	R	R	R	R	R	R	R	A	R	NA	R	R	R	R	R	R	A	R	R	NA	A	R	NA	R	R	R	NA	A	R	R	A	R	R	R	R	R	R	R	R
ChrII	14.1	R	R	R	R	R	R	R	R	R	R	R	R	R	R	R	R	A	R	A	R	R	R	R	R	R	A	R	R	NA	A	R	A	R	R	R	NA	A	R	R	A	R	R	R	R	R	R	R	R
ChrII	14.2	R	R	R	R	R	R	R	R	R	R	R	R	R	R	R	R	A	R	A	R	R	R	R	R	R	A	R	R	A	A	R	A	R	R	R	A	A	R	R	A	R	R	R	R	R	R	R	R
ChrII	14.3	R	R	R	R	R	R	R	R	R	R	R	R	R	R	R	R	A	R	A	R	R	R	R	R	R	A	R	R	NA	A	R	NA	R	R	R	NA	A	R	R	A	R	R	R	R	R	R	R	R
ChrII	14.4	R	R	R	R	R	R	R	R	R	R	R	R	R	R	R	R	A	R	A	R	R	R	R	R	R	A	R	R	A	A	R	A	R	R	R	A	A	R	R	A	R	R	R	R	R	R	R	R
ChrII	14.5	R	R	R	R	R	R	R	R	R	R	R	R	R	R	R	R	A	R	A	R	R	R	R	R	R	A	R	R	A	A	R	A	R	R	R	A	A	R	R	A	R	R	R	R	R	R	R	R
ChrII	14.6	R	R	R	R	R	R	R	R	R	R	R	R	R	R	R	R	A	R	A	R	R	R	R	R	R	A	R	R	A	A	R	A	R	R	R	A	A	R	R	A	R	R	R	R	R	R	R	R
ChrII	14.7	R	R	R	R	R	R	R	R	R	R	R	R	R	R	R	R	NA	R	A	R	R	R	R	R	R	A	R	R	NA	A	R	NA	R	R	R	NA	NA	R	R	A	R	R	R	R	R	R	R	R
ChrII	14.8	R	R	R	R	R	R	R	R	R	R	R	R	R	R	R	R	A	R	NA	R	NA	R	R	R	R	A	R	R	A	A	R	A	R	R	R	NA	A	R	R	A	R	R	R	R	R	R	R	R
ChrII	14.9	R	R	R	R	R	R	R	R	R	R	R	R	R	R	R	R	A	R	A	R	R	R	R	R	R	A	R	R	NA	A	R	A	R	R	R	NA	A	R	R	A	R	R	R	R	R	R	R	R
ChrII	15	R	R	R	R	R	R	R	R	R	R	R	R	R	R	R	R	A	R	A	R	R	R	NA	R	R	A	R	R	NA	A	R	A	R	R	R	A	A	R	R	A	R	R	R	R	R	R	R	R
ChrII	15.1	R	R	R	R	R	R	R	R	R	R	R	R	R	R	R	R	A	R	A	R	R	R	R	R	R	A	R	R	A	A	R	A	R	R	R	A	A	R	R	A	R	R	R	R	R	R	R	R
ChrII	15.2	R	R	R	R	R	R	R	R	R	R	R	R	R	R	R	R	A	R	A	R	NA	R	R	R	R	A	R	R	A	A	R	A	R	R	R	A	A	R	R	A	R	R	R	R	R	R	R	R
ChrII	15.3	R	R	R	R	R	R	R	R	R	R	R	R	R	R	R	R	A	R	A	R	R	R	R	R	R	A	R	R	A	A	R	A	R	R	R	A	A	R	R	A	R	R	R	R	R	R	R	R
ChrII	15.4	R	R	R	R	R	R	R	R	R	R	R	R	R	R	R	R	A	R	A	R	R	R	R	R	R	A	R	R	NA	A	R	A	R	R	R	A	A	R	R	A	R	R	R	R	R	R	R	R
ChrII	15.5	R	R	R	R	R	R	R	R	R	R	R	R	R	R	R	R	A	R	A	R	R	R	R	R	R	A	R	R	A	A	R	A	R	R	R	A	A	R	R	A	R	R	R	R	R	R	R	R
ChrII	15.6	R	R	R	R	R	R	NA	R	R	R	R	R	R	R	R	R	A	R	A	R	R	R	R	R	R	A	R	R	A	A	R	A	R	R	R	A	A	R	R	A	R	R	R	R	R	R	R	R
ChrII	15.7	R	R	R	R	R	R	R	R	R	R	R	R	R	R	R	R	A	R	A	R	R	R	R	R	R	A	R	R	A	A	R	A	R	R	R	A	A	R	R	A	R	R	R	R	R	R	R	R
ChrII	15.8	R	R	R	R	R	R	R	R	R	R	R	R	R	R	R	R	A	R	A	R	R	R	R	R	R	A	R	R	A	A	R	A	R	R	R	A	A	R	R	A	R	R	R	R	R	R	R	R
ChrII	15.9	R	R	R	R	R	R	R	R	R	R	R	R	R	R	R	R	NA	R	A	R	R	R	R	R	R	A	R	R	A	A	R	A	R	R	R	A	A	R	R	A	R	R	R	R	R	R	R	R
ChrII	16	R	R	R	R	R	R	R	R	R	R	R	R	R	R	R	R	A	R	A	R	R	R	R	R	R	A	R	R	A	A	R	A	R	R	R	A	NA	R	R	A	R	R	R	R	R	R	R	R
ChrII	16.1	R	R	R	R	R	R	R	R	R	R	R	R	R	R	R	R	A	R	A	R	R	R	R	R	R	A	R	R	A	A	R	A	R	R	R	NA	A	R	R	A	R	R	R	R	R	R	R	R
ChrII	16.2	R	R	R	R	R	R	R	R	NA	R	R	R	R	R	NA	R	A	R	A	R	R	R	R	R	NA	A	R	R	A	A	R	A	R	R	R	A	A	R	R	A	R	R	R	R	R	R	R	R
ChrII	16.3	R	R	R	R	R	R	R	R	R	R	R	R	R	R	R	R	A	R	NA	R	R	R	R	R	R	A	R	R	A	A	R	NA	R	R	R	NA	A	R	R	A	R	R	R	R	R	R	R	R
ChrII	16.4	R	R	R	R	R	R	R	R	R	R	R	R	R	R	R	R	A	R	A	R	R	R	R	R	R	A	R	R	A	A	R	A	R	R	R	A	A	R	R	A	R	R	R	R	R	R	R	R
ChrII	16.5	R	R	R	R	R	R	R	R	R	NA	R	R	R	R	R	R	A	R	A	R	R	R	R	R	R	A	R	R	A	A	R	A	R	R	R	A	A	R	R	A	R	R	R	R	R	R	R	R
ChrII	16.6	R	R	R	R	R	R	R	R	R	A	R	R	R	R	R	R	A	R	A	R	R	R	R	R	R	A	R	R	A	A	R	A	R	R	R	A	A	R	R	A	R	R	R	R	R	R	R	R
ChrII	16.7	R	R	R	R	R	R	R	R	R	A	R	R	R	R	R	R	A	R	A	R	R	R	R	R	R	A	R	R	A	A	R	A	R	R	R	A	A	R	R	A	R	R	R	R	R	R	R	R
ChrII	16.8	R	R	R	R	R	NA	NA	NA	R	A	R	R	R	R	R	R	NA	R	NA	R	R	R	R	R	R	NA	R	R	A	NA	R	NA	R	R	R	NA	NA	R	R	NA	R	R	R	R	R	R	R	R
ChrII	16.9	R	R	R	R	R	R	R	R	R	NA	R	NA	R	R	R	R	A	R	NA	R	R	R	R	R	R	A	R	R	NA	A	R	A	R	R	R	NA	A	R	R	A	R	R	R	R	R	R	R	R
ChrII	17	R	R	R	R	R	R	R	R	R	A	R	R	R	R	R	R	A	R	R	R	R	R	R	R	R	A	R	R	A	A	R	A	R	R	R	A	A	R	R	A	R	R	R	R	R	R	R	R
ChrII	17.1	R	R	R	R	R	R	R	R	R	A	R	R	R	R	R	R	A	R	R	R	R	R	R	R	R	A	R	R	A	A	R	NA	R	R	R	NA	A	R	R	A	R	R	R	R	R	R	R	R
ChrII	17.2	R	R	R	R	R	R	R	R	R	A	R	R	R	R	NA	R	A	R	R	R	R	R	R	R	R	A	R	R	NA	A	R	NA	R	R	R	NA	A	R	R	A	R	R	R	R	R	R	R	R
ChrII	17.4	R	R	R	R	R	A	R	R	R	A	R	R	R	R	A	R	A	R	R	R	R	R	R	R	R	A	NA	R	A	A	R	A	R	R	R	A	A	R	R	A	R	R	R	R	R	R	R	R
ChrII	17.5	R	R	R	R	R	A	R	R	R	A	R	R	R	R	A	R	A	R	R	R	R	R	R	R	R	A	R	R	A	A	R	A	R	R	R	A	A	R	R	A	R	R	R	R	R	R	R	R
ChrII	17.6	R	R	R	R	R	A	R	R	R	A	R	R	R	NA	NA	R	A	R	R	R	R	R	R	R	R	A	R	R	A	A	R	A	R	R	R	NA	A	R	R	A	R	R	R	R	R	R	R	R
ChrII	17.7	R	R	R	R	R	A	R	R	R	NA	R	R	R	R	NA	R	A	R	R	R	R	R	R	R	R	A	R	R	A	A	R	NA	R	R	R	NA	NA	R	R	A	R	R	R	R	R	R	R	R
ChrII	17.8	R	R	R	R	R	A	R	R	R	A	R	R	R	R	A	R	A	R	R	R	R	R	R	R	R	A	R	R	A	A	R	A	R	R	R	A	A	R	R	A	R	R	R	R	R	R	R	R
ChrII	17.9	R	R	R	R	R	A	R	R	R	NA	R	R	R	R	A	R	A	R	R	R	R	R	R	R	R	A	R	R	A	A	R	A	R	R	R	NA	A	R	R	A	R	R	R	R	R	R	R	R
ChrII	18	R	R	R	R	R	A	R	R	R	A	R	R	R	R	A	R	A	R	R	R	R	R	R	R	R	A	R	R	A	A	R	A	R	R	R	A	A	R	R	A	R	R	R	R	R	R	R	R
ChrII	18.1	R	R	R	R	R	A	R	R	R	NA	R	R	R	R	A	R	A	R	R	R	R	R	R	R	R	NA	R	R	A	A	R	A	R	R	R	NA	A	R	R	A	R	R	R	R	R	R	R	R
ChrII	18.2	R	R	R	R	R	A	R	R	R	A	R	R	R	R	A	R	A	R	R	R	R	R	R	R	R	A	R	R	A	A	R	A	R	R	R	A	A	R	R	A	R	R	R	R	R	R	R	R
ChrII	18.3	R	R	R	R	R	A	R	R	R	A	R	R	R	NA	NA	R	A	R	R	R	R	R	R	R	R	A	R	R	A	A	R	A	R	R	R	NA	A	R	R	A	R	R	R	R	R	R	R	R
ChrII	18.4	R	R	R	R	R	A	R	R	R	A	R	R	R	R	NA	R	A	R	R	R	R	R	R	R	R	A	R	R	A	A	R	A	R	R	R	A	A	R	R	A	R	R	R	R	R	R	R	R
ChrII	18.5	R	R	R	R	R	A	R	R	R	A	R	R	R	R	A	R	A	R	R	NA	R	R	R	R	R	A	R	R	A	A	R	A	R	R	R	A	A	R	R	A	R	R	R	R	R	R	R	R
ChrII	18.6	R	R	R	R	R	A	R	R	R	A	R	R	R	R	A	R	NA	R	R	NA	R	R	NA	R	R	A	R	R	A	A	R	A	R	R	R	A	A	R	R	A	R	R	R	R	R	R	R	R
ChrII	18.7	R	R	R	R	R	A	R	R	R	A	R	R	R	R	A	R	A	R	R	R	R	R	R	R	R	A	R	R	A	A	R	A	R	R	R	A	A	R	R	A	R	R	R	R	R	R	R	R
ChrII	18.8	R	R	R	R	R	A	R	R	R	A	NA	R	R	R	A	R	A	R	R	R	R	R	R	R	R	A	R	R	A	A	R	A	R	R	R	A	A	R	R	A	R	R	R	R	R	R	R	R
ChrII	18.9	R	R	R	R	R	A	R	R	R	A	R	R	R	R	NA	R	A	R	R	R	R	R	R	R	R	A	R	R	A	A	R	NA	R	R	R	A	A	R	R	A	R	R	R	R	R	R	R	R
ChrII	19	R	R	R	R	R	A	R	R	NA	A	NA	R	R	R	NA	R	A	R	R	R	R	R	NA	R	R	A	R	R	A	A	NA	NA	R	R	R	A	NA	NA	NA	A	R	R	NA	R	R	R	NA	R
ChrII	19.1	R	R	R	R	R	A	R	R	R	A	R	R	R	R	A	R	A	R	R	R	R	R	R	R	R	A	R	R	A	A	R	A	R	R	R	A	A	R	R	A	R	R	R	R	R	R	R	R
ChrII	19.2	R	R	R	R	R	A	R	R	R	A	R	R	R	R	NA	R	A	R	R	R	R	R	R	R	R	A	R	R	A	A	R	A	R	R	R	A	A	R	R	A	NA	R	R	R	R	NA	R	R
ChrII	19.3	R	R	R	R	R	NA	R	R	R	A	R	R	R	R	A	R	A	R	R	R	R	R	R	R	NA	A	R	R	A	A	R	A	R	R	R	A	A	R	R	A	R	R	R	R	R	R	R	R
ChrII	19.4	R	R	R	R	R	A	R	R	R	A	R	R	R	R	A	R	A	R	R	R	A	R	R	R	A	A	R	R	A	A	R	A	R	R	R	A	A	R	R	R	R	R	R	R	A	R	A	R
ChrII	19.5	R	NA	R	NA	R	A	NA	NA	R	A	NA	R	R	R	NA	R	A	R	R	NA	A	R	NA	R	NA	A	R	R	A	A	R	A	R	R	R	A	A	R	R	R	R	R	R	R	A	R	A	R
ChrII	19.6	R	A	R	R	R	A	R	R	R	A	R	R	R	R	NA	R	A	R	R	A	A	R	R	R	A	A	R	R	A	A	R	A	R	R	R	A	A	R	R	R	R	R	R	R	A	R	A	R
ChrII	19.7	R	A	R	R	R	NA	R	R	R	A	R	R	R	R	A	R	A	R	R	A	A	R	R	NA	A	A	R	NA	A	A	R	A	R	R	R	A	A	NA	R	R	R	R	R	R	NA	R	NA	R
ChrII	20.2	NA	A	A	R	NA	A	R	NA	NA	A	R	R	R	R	NA	NA	A	R	R	A	A	R	R	R	NA	A	R	R	A	A	R	A	R	R	R	A	A	R	R	R	R	R	R	R	A	R	A	R
ChrII	20.3	NA	A	A	R	NA	A	R	R	R	A	R	R	R	R	A	A	A	R	R	A	A	R	R	R	A	A	R	R	A	A	R	A	R	R	R	A	A	R	R	R	R	R	R	R	A	R	A	R
ChrII	20.4	A	A	A	R	A	A	R	R	R	A	R	R	R	R	NA	NA	A	R	R	A	A	R	R	R	NA	A	R	R	A	A	R	A	R	R	R	A	A	R	R	R	R	R	R	R	A	R	A	R
ChrII	20.5	A	A	A	R	A	A	R	R	R	A	R	R	R	R	A	A	A	R	R	A	A	R	R	R	A	A	R	R	A	A	R	A	R	R	R	A	A	R	R	R	R	R	R	R	A	R	A	R
ChrII	20.6	A	NA	A	A	A	A	R	R	R	A	R	R	R	R	NA	A	A	R	NA	A	NA	R	R	R	A	A	R	R	A	A	R	NA	R	R	R	A	A	R	R	R	R	R	R	R	A	R	A	R
ChrII	20.7	NA	A	A	A	A	A	R	R	R	A	R	R	R	NA	A	NA	A	R	R	A	A	R	R	R	A	A	R	R	A	A	R	NA	R	R	R	A	A	R	R	R	R	R	R	R	A	R	A	R
ChrII	20.8	A	A	NA	A	A	A	R	R	R	A	R	R	R	NA	A	NA	NA	R	R	A	A	R	R	R	NA	A	R	R	A	A	R	NA	R	R	R	A	NA	R	R	R	R	R	R	R	A	R	A	R
ChrII	21	NA	A	A	A	A	A	R	R	NA	A	R	R	R	NA	A	A	A	R	NA	A	A	R	R	R	A	A	R	R	A	A	R	A	R	R	R	A	A	R	R	R	R	NA	R	R	A	R	A	R
ChrII	21.2	A	A	A	A	A	A	R	R	R	A	R	R	R	NA	A	A	A	R	R	A	A	R	R	R	NA	A	R	R	A	A	R	NA	R	R	R	A	NA	R	R	R	R	R	R	R	A	R	A	R
ChrII	21.3	A	A	A	A	A	A	R	R	R	A	R	R	R	A	A	A	A	R	R	A	A	R	R	R	NA	A	R	R	A	A	R	NA	R	R	R	A	A	R	R	R	R	R	R	R	A	R	A	R
ChrII	21.4	A	A	A	A	A	A	R	R	R	A	R	R	R	A	A	A	A	R	R	A	A	R	R	R	A	A	R	R	A	A	R	A	NA	R	R	A	A	R	R	R	R	R	R	R	A	R	A	R
ChrII	21.5	A	A	A	A	A	A	R	R	R	A	R	R	R	A	A	A	A	R	R	A	A	R	R	R	A	A	NA	NA	A	A	R	A	R	R	R	A	A	R	R	R	R	R	R	R	A	R	A	NA
ChrII	21.6	A	A	A	A	A	A	R	R	R	A	R	R	R	A	A	A	A	R	R	A	A	R	R	R	A	A	R	R	A	A	R	A	R	R	R	A	A	R	R	R	R	R	R	R	A	R	A	A
ChrII	21.7	NA	A	NA	A	A	A	R	R	R	A	R	R	R	A	NA	NA	A	R	R	A	A	R	R	R	A	A	R	R	A	A	R	A	R	R	R	A	NA	R	R	R	R	R	R	R	A	R	A	A
ChrII	21.9	A	A	A	A	A	A	R	NA	R	A	R	R	R	A	A	A	NA	R	R	A	A	R	R	R	A	A	R	R	A	A	R	NA	R	R	R	A	A	R	R	R	R	R	R	R	A	R	A	A
ChrII	22	A	A	NA	A	A	A	R	R	R	A	R	R	R	NA	NA	A	A	R	R	A	A	R	R	R	A	A	R	R	A	A	R	NA	R	R	R	A	A	R	R	R	R	R	R	R	A	R	A	A
ChrII	22.1	A	A	A	A	A	A	R	R	R	A	R	R	R	A	A	A	A	R	R	A	A	R	R	R	A	A	R	R	A	A	R	A	R	R	R	A	A	R	R	R	R	R	R	R	A	R	A	A
ChrII	22.2	A	A	A	A	A	A	R	R	R	A	R	R	R	A	A	A	A	R	R	NA	A	R	R	R	A	A	R	R	A	A	R	A	R	R	R	A	A	R	R	R	R	R	R	R	A	R	A	A
ChrII	22.3	A	A	A	A	A	A	R	R	R	A	R	R	R	A	A	A	A	R	R	A	A	R	R	R	A	A	R	R	A	A	R	A	R	R	R	A	A	R	R	R	R	R	R	R	A	R	A	A
ChrII	22.4	A	A	A	A	A	A	R	R	R	A	R	R	R	A	A	A	A	R	R	A	A	R	R	R	A	A	R	R	A	A	R	A	R	R	R	A	A	R	R	R	R	R	R	R	A	R	A	A
ChrII	22.5	A	A	A	A	A	A	R	R	R	A	R	R	R	A	A	A	A	R	R	A	A	R	R	R	A	A	R	R	A	A	R	A	R	R	R	A	A	R	R	R	R	R	R	R	A	R	A	A
ChrII	22.6	A	A	A	A	A	A	R	R	R	A	R	R	R	NA	A	A	A	R	R	A	A	R	R	R	A	A	R	R	A	A	R	A	R	R	R	A	A	R	R	R	R	R	R	R	A	R	A	A
ChrII	22.7	A	A	A	A	A	A	R	R	R	A	R	R	R	A	A	A	A	R	R	A	A	R	R	R	A	A	R	R	A	A	R	A	R	NA	R	A	NA	R	R	R	R	R	R	R	A	R	A	A
ChrII	22.8	A	A	A	A	A	A	R	R	R	A	R	R	R	A	A	A	A	R	R	A	A	R	R	R	A	A	R	R	A	A	R	A	R	R	R	A	A	R	R	R	R	R	R	R	A	R	A	A
ChrII	22.9	A	A	A	A	A	A	R	R	R	A	R	R	R	NA	A	A	A	R	R	A	A	R	R	R	A	A	R	R	A	A	R	A	R	R	R	A	A	R	R	R	R	R	R	R	A	R	A	A
ChrII	23	A	A	A	A	A	A	R	R	R	A	R	R	R	A	A	A	A	R	R	A	A	R	R	R	A	A	R	R	A	A	R	A	R	R	R	A	A	R	R	R	R	R	R	R	A	R	A	A
ChrII	23.1	A	A	A	A	A	A	R	R	R	A	R	R	R	A	A	NA	A	R	R	NA	A	R	R	R	A	A	R	R	A	A	R	A	R	R	R	A	A	R	R	R	R	R	R	R	A	R	A	A
ChrII	23.2	NA	A	NA	A	A	A	R	R	R	A	R	R	R	NA	NA	NA	A	R	R	NA	A	R	R	R	NA	A	R	R	A	A	R	NA	R	R	R	NA	NA	R	R	R	R	R	R	R	A	R	A	A
ChrIII	0	R	R	A	A	R	R	A	A	A	A	A	R	A	A	A	A	R	A	A	R	A	A	A	R	R	A	R	A	A	A	R	A	A	A	R	R	R	A	A	R	R	A	A	R	R	A	A	A
ChrIII	0.1	R	R	A	A	R	R	A	A	A	A	A	R	A	A	A	A	R	A	A	R	A	A	A	R	R	A	R	A	A	A	R	A	A	NA	R	R	R	A	A	R	R	A	A	R	R	A	A	A
ChrIII	0.2	R	R	A	A	R	R	NA	A	A	A	A	R	A	A	NA	A	R	A	A	R	A	A	A	R	R	A	R	NA	A	A	R	NA	A	A	R	R	R	A	A	R	R	A	A	R	R	A	A	A
ChrIII	0.3	R	R	A	A	R	R	A	A	A	A	A	R	A	A	NA	A	R	A	A	R	A	A	A	R	R	A	R	A	A	A	R	A	A	A	R	R	R	A	A	R	R	A	A	R	R	A	A	A
ChrIII	0.4	R	R	A	A	R	R	A	A	A	A	A	R	A	A	A	A	R	A	A	R	A	A	A	R	R	A	R	A	A	A	R	A	A	A	R	R	R	A	A	R	R	A	A	R	R	A	A	A
ChrIII	0.5	R	R	A	A	R	R	NA	A	A	A	A	R	A	A	A	A	R	A	A	R	A	NA	A	R	R	A	R	A	A	A	R	A	NA	A	R	R	R	A	A	R	R	A	A	R	R	A	A	A
ChrIII	0.7	R	R	NA	A	R	R	NA	NA	A	A	A	R	NA	A	NA	A	R	A	NA	R	A	A	A	R	R	NA	R	NA	A	NA	R	NA	NA	A	R	R	R	NA	A	R	R	A	A	R	R	NA	NA	A
ChrIII	0.8	R	R	A	A	R	R	A	A	A	A	A	R	A	A	A	A	R	A	A	R	A	A	A	R	R	A	R	A	A	A	R	A	A	A	R	R	R	A	A	R	R	A	A	R	R	A	A	A
ChrIII	0.9	R	R	A	A	R	R	A	A	A	A	A	R	A	NA	NA	A	R	A	A	R	A	A	A	R	R	A	R	A	NA	A	R	A	A	A	R	R	R	A	A	R	R	A	A	R	R	A	A	A
ChrIII	1.3	NA	R	A	A	R	R	A	A	A	A	A	NA	A	A	NA	A	R	A	A	R	A	A	A	A	R	A	R	A	A	A	R	A	A	A	R	R	R	A	A	NA	R	A	A	R	R	A	A	A
ChrIII	1.4	R	R	A	A	R	R	A	A	A	A	A	R	A	A	NA	A	R	A	NA	R	A	A	A	A	R	A	R	A	A	A	R	A	A	A	R	R	R	A	A	R	R	A	A	R	R	A	A	A
ChrIII	1.5	R	R	A	A	R	R	A	A	A	A	A	NA	A	A	NA	A	R	A	A	R	NA	NA	A	A	R	A	R	A	A	A	R	A	A	A	R	R	R	A	A	R	R	A	A	R	R	A	A	A
ChrIII	1.6	R	R	A	A	R	R	NA	NA	A	A	NA	R	A	A	NA	A	R	A	NA	R	NA	A	A	NA	R	A	R	A	A	NA	R	NA	NA	A	R	R	R	A	A	R	R	A	A	R	R	A	NA	A
ChrIII	1.7	R	R	NA	A	R	R	NA	R	A	A	A	R	A	A	NA	A	R	A	NA	R	A	NA	A	A	R	NA	NA	A	A	NA	R	NA	NA	NA	R	R	R	NA	A	R	R	A	A	R	R	NA	A	A
ChrIII	1.8	R	R	A	A	R	R	NA	R	A	A	A	R	A	A	NA	A	R	A	A	R	NA	A	A	A	R	A	R	A	A	NA	R	A	A	A	R	R	R	A	A	R	R	A	A	R	R	A	A	A
ChrIII	1.9	NA	R	A	A	R	R	A	R	A	A	A	R	A	A	A	A	R	A	A	NA	A	A	A	A	R	A	R	A	A	A	R	NA	A	A	R	R	R	A	A	R	R	A	A	R	R	A	A	A
ChrIII	2	R	R	A	A	R	R	A	R	A	A	A	R	A	A	A	A	R	A	A	R	A	A	A	A	R	A	R	A	A	A	R	A	A	A	R	R	R	A	A	R	R	A	A	R	R	A	A	A
ChrIII	2.1	R	R	A	A	R	R	A	R	A	A	A	R	A	A	A	A	R	A	A	R	A	A	A	A	R	A	R	A	A	A	R	A	A	A	R	R	R	A	A	R	R	A	A	R	R	A	A	A
ChrIII	2.2	R	R	A	A	R	R	A	NA	A	A	A	R	A	A	A	A	R	A	A	R	A	A	NA	A	R	A	R	A	A	A	R	A	A	A	R	R	R	A	A	R	R	A	A	R	R	A	A	A
ChrIII	2.3	R	R	A	A	R	R	A	R	A	A	A	R	A	A	A	A	R	A	A	R	A	A	A	A	R	A	R	A	A	A	R	A	A	A	R	R	A	A	A	R	R	A	A	R	NA	A	A	A
ChrIII	2.5	R	R	A	A	R	R	A	NA	A	A	A	R	A	A	A	A	R	A	A	R	R	A	A	A	R	A	R	A	A	A	R	A	A	A	R	R	A	A	A	R	R	A	A	R	R	A	A	A
ChrIII	2.6	R	R	A	A	R	R	A	R	A	A	A	R	A	A	A	A	R	A	A	R	R	A	A	A	R	A	R	A	A	A	R	A	A	A	R	R	A	A	A	R	R	A	A	R	R	A	A	A
ChrIII	2.7	R	R	NA	A	R	R	A	R	A	A	A	R	NA	A	NA	A	R	A	A	R	R	A	NA	NA	R	NA	NA	NA	A	A	R	A	NA	A	R	R	A	A	A	R	R	A	A	R	R	A	A	A
ChrIII	2.8	R	R	A	A	R	R	A	R	A	A	A	R	A	A	A	A	R	A	A	R	R	A	A	A	R	NA	R	A	A	A	R	A	A	NA	R	R	A	A	A	R	R	A	A	R	R	A	A	A
ChrIII	2.9	R	R	A	A	R	R	A	R	A	A	A	R	A	A	NA	A	R	A	A	R	R	A	A	A	R	A	R	A	A	A	R	A	A	A	R	R	A	A	A	R	R	A	A	R	R	A	A	A
ChrIII	3.1	R	R	A	A	R	R	A	R	A	A	A	R	A	A	A	A	R	A	A	R	R	A	A	A	R	A	R	A	A	A	R	A	A	A	R	R	A	A	A	R	R	A	A	R	R	A	A	A
ChrIII	3.2	R	R	A	A	R	R	A	R	A	A	A	R	A	A	NA	A	R	A	A	R	R	A	A	A	R	A	R	A	A	A	R	A	A	A	R	R	A	A	A	R	R	A	A	R	R	A	A	A
ChrIII	3.3	R	R	A	A	R	R	A	R	A	A	A	R	A	A	A	A	R	A	A	R	R	A	A	A	R	A	R	A	A	A	R	A	A	A	R	R	A	A	A	R	R	A	A	R	R	A	A	A
ChrIII	3.4	R	R	A	A	R	R	A	R	A	A	A	R	A	A	A	A	R	A	A	R	R	A	A	A	R	A	R	A	A	A	R	A	A	A	R	R	A	A	A	R	R	A	A	R	R	A	A	A
ChrIII	3.5	R	R	A	A	R	NA	A	R	A	A	A	R	A	A	NA	A	R	A	A	R	NA	A	A	A	R	A	R	A	A	A	R	A	A	A	R	R	A	A	A	R	R	A	A	R	R	A	A	A
ChrIII	3.6	R	R	A	A	R	A	A	R	A	A	A	R	A	A	R	A	R	A	A	R	R	A	R	A	R	A	R	A	A	A	R	A	A	A	R	R	A	A	A	R	R	A	A	R	R	A	A	A
ChrIII	3.7	R	R	A	A	R	A	NA	NA	A	A	A	R	A	NA	R	A	R	A	A	R	R	A	R	A	R	A	R	NA	A	A	R	A	A	A	R	R	A	A	A	R	R	A	A	R	R	A	A	A
ChrIII	3.8	R	R	A	A	R	A	A	R	A	A	A	R	A	A	R	A	R	A	A	R	R	A	R	A	R	A	R	A	A	A	R	A	A	A	R	R	A	A	A	R	R	A	A	R	R	A	A	A
ChrIII	3.9	R	R	A	A	R	A	A	R	A	A	A	R	A	A	R	A	R	A	A	NA	R	A	R	A	R	A	R	A	A	A	R	A	A	A	R	R	A	A	A	R	R	A	A	R	NA	A	A	A
ChrIII	4	R	R	A	A	R	A	A	NA	A	A	A	R	A	A	R	A	R	A	A	R	R	A	R	A	R	NA	R	A	A	A	R	A	A	A	R	R	A	A	A	R	R	A	A	R	R	A	A	A
ChrIII	4.1	R	R	NA	A	R	A	A	NA	A	A	A	R	A	A	R	A	R	A	NA	R	NA	A	NA	A	R	A	R	A	A	A	R	A	A	A	R	R	A	A	A	R	R	A	A	R	R	A	A	A
ChrIII	4.2	R	R	NA	A	R	A	A	R	A	A	NA	R	A	A	R	A	R	A	A	R	R	NA	R	NA	R	A	R	A	A	A	R	A	NA	A	R	R	A	A	A	R	R	A	A	R	R	A	NA	A
ChrIII	4.3	R	R	A	A	R	A	NA	R	A	A	A	R	A	A	R	A	R	A	A	R	R	A	R	A	R	A	R	A	A	A	R	A	NA	A	R	R	A	A	A	R	R	A	A	R	R	A	NA	A
ChrIII	4.4	R	R	A	A	R	A	A	R	A	A	A	R	A	A	NA	A	R	A	A	R	R	A	R	A	R	A	R	A	A	A	R	A	A	A	R	R	A	A	A	R	R	A	A	R	R	A	A	A
ChrIII	4.5	R	R	A	A	R	A	A	R	A	A	A	R	A	A	R	A	R	A	A	R	R	A	R	A	R	A	R	A	A	A	R	A	A	A	R	R	A	A	A	R	R	A	A	R	R	A	A	A
ChrIII	4.6	R	R	A	A	R	A	A	R	A	A	A	R	A	A	R	A	R	A	A	R	R	A	R	A	R	A	NA	A	A	A	R	A	A	A	R	R	A	A	A	R	R	A	A	R	R	A	A	A
ChrIII	4.7	NA	R	A	A	R	A	A	NA	A	A	A	R	A	NA	R	NA	R	A	A	R	NA	A	NA	A	R	A	R	A	A	A	R	A	A	A	R	R	A	A	A	NA	R	A	A	R	NA	A	A	A
ChrIII	4.8	R	R	A	A	R	A	A	R	A	A	A	R	A	A	R	A	R	A	A	R	R	A	R	A	R	A	R	A	A	A	R	A	A	A	R	R	A	A	A	R	R	A	A	R	R	A	A	A
ChrIII	4.9	R	R	A	A	R	A	A	R	A	A	A	R	A	A	R	A	R	NA	A	R	NA	A	R	A	R	NA	R	A	A	A	R	A	A	NA	R	R	A	A	A	R	R	A	A	R	R	A	A	A
ChrIII	5	R	R	A	A	R	A	A	R	A	A	A	R	A	A	R	A	R	R	A	R	R	A	R	A	R	R	R	A	A	A	R	A	A	A	R	R	A	A	A	R	R	A	A	R	R	A	A	A
ChrIII	5.1	R	R	A	A	R	NA	A	R	A	A	A	R	A	A	R	A	R	R	A	R	R	A	R	A	R	R	R	A	A	A	R	A	A	A	R	R	A	A	A	R	R	A	A	R	R	A	A	A
ChrIII	5.2	R	R	A	A	R	NA	A	R	A	A	A	R	A	A	R	A	R	R	A	R	R	A	R	A	R	R	R	A	A	A	R	A	A	NA	R	R	A	A	A	R	R	A	A	R	R	A	A	A
ChrIII	5.3	R	R	A	A	R	A	A	R	R	A	A	R	A	A	R	A	R	R	A	R	R	A	R	A	R	R	R	A	A	A	R	A	A	A	R	R	A	A	A	R	R	A	A	R	R	A	A	A
ChrIII	5.4	R	R	A	A	R	A	A	R	R	A	A	R	A	A	R	A	R	R	A	R	R	A	R	A	R	R	R	A	A	A	R	A	A	A	R	R	A	A	A	R	R	A	A	R	R	A	A	A
ChrIII	5.5	NA	R	A	A	R	A	A	NA	NA	A	A	NA	A	A	R	A	R	R	A	R	R	A	R	A	R	R	R	NA	A	A	R	A	A	A	R	R	A	A	A	NA	R	A	A	R	NA	A	A	A
ChrIII	5.6	R	R	A	A	R	A	A	R	R	A	A	R	A	A	R	A	R	R	A	R	R	A	R	A	R	R	R	A	A	A	R	A	A	A	R	R	A	A	A	R	R	A	A	R	R	A	A	A
ChrIII	5.7	R	R	A	NA	R	A	NA	R	R	A	A	R	A	A	R	A	R	R	A	NA	R	A	R	A	R	R	R	A	A	A	R	A	A	A	R	R	A	A	A	R	R	A	A	R	R	A	A	A
ChrIII	5.8	R	R	A	A	R	A	NA	R	R	A	A	R	A	A	R	R	R	R	A	R	R	A	R	A	R	R	R	A	A	A	R	NA	A	A	R	R	A	A	A	R	R	A	A	R	R	A	A	A
ChrIII	5.9	R	R	A	A	R	A	A	R	R	A	A	R	A	A	R	R	R	R	A	R	R	A	R	A	R	R	R	A	A	A	R	A	A	A	R	R	A	A	A	R	R	A	A	R	R	A	A	A
ChrIII	6	R	R	A	A	R	A	A	R	R	A	A	R	A	A	R	R	R	R	A	R	R	A	R	A	R	R	R	A	A	A	R	A	A	A	R	R	A	A	A	R	R	A	A	R	R	A	A	A
ChrIII	6.1	R	R	A	A	R	A	A	R	R	A	A	R	A	A	R	R	R	R	A	R	R	A	R	A	R	R	R	A	A	A	R	A	A	A	R	R	A	A	A	R	R	A	A	R	R	A	A	A
ChrIII	6.2	R	R	A	A	R	A	A	NA	R	A	A	R	A	A	R	R	R	R	A	R	NA	A	NA	A	R	R	R	A	A	A	R	A	A	A	R	R	A	NA	A	R	R	A	A	R	NA	A	A	A
ChrIII	6.3	R	R	A	A	R	NA	A	R	R	A	A	R	A	A	R	R	R	R	A	R	R	A	R	A	R	R	R	A	A	A	R	A	NA	A	R	R	A	R	A	R	R	A	A	R	R	A	A	A
ChrIII	6.4	R	R	A	A	R	NA	NA	R	R	A	NA	R	A	NA	NA	R	R	R	NA	R	R	NA	R	A	R	R	R	A	A	A	R	NA	NA	A	R	R	NA	R	A	R	R	A	A	R	R	A	NA	A
ChrIII	6.5	NA	R	A	A	R	A	A	NA	NA	A	A	NA	A	A	NA	R	R	R	A	R	NA	A	R	A	R	R	R	A	A	A	R	A	A	A	R	R	A	R	A	NA	R	A	A	R	NA	A	A	A
ChrIII	6.6	R	R	A	A	R	A	A	R	R	A	A	R	A	A	R	R	R	R	A	R	R	A	R	A	R	R	R	A	A	A	R	A	A	A	R	R	A	R	A	R	R	A	A	R	R	A	A	A
ChrIII	6.7	R	R	A	A	R	A	A	R	R	A	A	R	A	A	R	R	R	R	A	R	R	A	R	A	R	R	R	A	A	A	R	A	A	A	R	R	A	R	A	R	R	A	A	R	R	A	A	A
ChrIII	6.8	R	R	A	A	R	A	NA	R	R	A	A	R	A	A	R	R	R	R	A	R	R	A	R	A	R	R	R	A	A	A	R	A	A	A	R	R	A	R	A	R	R	A	A	R	R	A	A	A
ChrIII	6.9	R	R	A	A	R	A	NA	NA	R	A	A	R	A	A	R	R	R	R	A	R	R	A	R	A	R	R	R	A	A	A	R	A	A	A	R	R	A	R	A	R	R	A	A	R	R	A	A	A
ChrIII	7	R	R	A	A	R	A	A	R	R	A	A	R	A	A	R	R	R	R	A	R	R	A	R	A	R	R	R	A	A	A	R	A	A	A	R	R	A	R	A	R	R	A	A	R	R	A	A	A
ChrIII	7.1	R	R	NA	A	R	A	NA	R	R	A	A	R	A	A	R	R	R	R	A	R	R	NA	R	A	R	R	R	A	A	NA	R	NA	A	A	R	R	A	R	A	R	R	A	A	R	R	A	A	A
ChrIII	7.2	R	R	NA	A	R	A	A	R	R	A	A	R	A	A	R	R	R	R	A	R	R	A	R	NA	R	R	R	A	NA	A	R	NA	A	A	R	R	A	R	A	R	R	A	A	R	R	A	NA	A
ChrIII	7.3	R	R	A	A	R	A	A	R	R	A	A	R	A	A	R	R	R	R	A	R	R	A	R	A	R	R	R	A	A	A	R	A	A	A	R	R	A	R	A	R	R	A	A	R	R	A	A	A
ChrIII	7.4	R	R	A	A	R	A	NA	NA	R	A	A	R	A	A	R	R	R	R	A	R	NA	A	R	A	R	R	R	A	NA	A	R	A	A	NA	R	R	A	R	A	R	R	A	A	R	NA	A	A	A
ChrIII	7.5	R	R	A	A	R	A	A	R	R	A	A	R	A	A	R	R	R	R	A	R	R	A	R	A	R	R	R	A	A	A	R	A	A	A	R	R	A	R	A	R	R	A	A	R	R	A	A	A
ChrIII	7.6	R	R	A	A	R	A	A	R	R	A	A	R	A	A	R	R	R	R	A	R	R	A	R	A	R	R	R	A	A	A	R	A	A	A	R	R	A	R	A	R	R	A	A	R	R	A	A	A
ChrIII	7.7	R	R	A	A	R	A	A	R	R	A	A	R	A	A	R	R	R	R	NA	R	R	A	R	A	R	R	R	A	A	A	R	A	A	A	R	R	A	R	A	R	R	A	A	R	R	A	A	A
ChrIII	7.8	R	R	A	A	R	A	A	R	R	A	A	R	A	A	R	R	R	R	NA	R	R	A	R	A	R	R	R	A	A	NA	R	A	A	NA	R	R	A	R	A	R	R	A	A	R	R	A	A	A
ChrIII	7.9	R	R	A	A	R	NA	A	R	R	A	A	R	A	A	R	R	R	R	A	R	R	A	R	A	R	R	R	A	A	A	R	A	A	A	R	R	A	R	A	R	R	A	A	R	R	A	A	A
ChrIII	8	R	R	A	A	R	A	A	R	R	A	A	R	A	A	R	R	R	R	A	R	R	A	R	A	R	R	R	A	A	A	R	NA	A	A	R	R	A	R	A	R	R	A	A	R	R	A	A	A
ChrIII	8.1	R	R	A	A	R	A	NA	R	R	A	A	R	A	A	R	R	R	R	A	R	R	A	R	A	R	R	R	A	A	A	R	A	A	A	R	R	A	R	A	R	R	A	A	R	R	A	A	A
ChrIII	8.2	R	R	A	A	R	A	NA	R	R	A	A	R	A	A	R	R	R	R	A	R	R	A	R	A	R	R	R	A	A	A	R	A	NA	A	R	R	A	R	A	R	R	A	A	R	R	A	A	A
ChrIII	8.3	R	R	A	A	R	A	A	R	R	A	A	R	A	A	R	R	R	R	A	R	R	A	R	A	R	R	R	A	A	A	R	A	A	A	R	R	A	R	A	R	R	A	A	R	R	A	NA	A
ChrIII	8.4	R	R	A	A	R	A	A	R	R	A	A	R	A	A	R	R	R	R	A	R	R	A	R	A	R	R	R	A	A	A	R	A	A	A	R	R	A	R	A	R	R	A	A	R	R	A	A	A
ChrIII	8.5	R	R	A	A	R	A	A	R	R	A	A	R	A	A	R	R	R	R	A	R	NA	A	R	A	R	R	R	A	A	A	R	A	A	A	R	R	A	R	A	R	R	A	A	R	R	A	A	A
ChrIII	8.6	R	R	A	A	R	A	A	R	R	A	A	R	A	A	R	R	R	R	A	R	R	A	R	A	R	R	R	A	A	A	R	A	A	A	R	R	A	R	A	R	R	A	A	R	R	A	A	A
ChrIII	8.7	R	R	A	A	R	A	A	R	R	A	A	R	A	A	R	R	R	R	A	R	R	A	R	A	R	R	R	A	A	A	R	A	A	A	R	R	A	R	A	R	R	A	A	R	R	A	A	A
ChrIII	8.8	R	R	A	A	R	A	A	R	R	A	A	R	A	NA	NA	R	R	R	NA	R	R	A	R	A	R	R	R	A	A	NA	R	NA	NA	A	R	R	A	R	A	R	R	A	A	R	R	NA	A	A
ChrIII	8.9	R	R	A	A	R	A	A	R	R	A	A	R	A	A	R	R	R	R	A	R	R	A	R	A	R	R	R	NA	A	A	R	A	A	A	R	R	A	R	A	R	R	A	A	R	R	A	A	A
ChrIII	9	R	R	A	A	R	A	A	R	R	A	A	R	A	A	R	R	R	R	A	R	NA	A	R	A	R	R	R	A	A	A	R	A	A	A	R	R	A	R	A	R	R	A	A	R	R	A	A	A
ChrIII	9.1	R	R	A	A	R	A	A	R	R	A	A	R	A	A	R	R	R	R	A	R	NA	A	R	A	R	R	R	A	A	A	R	A	A	NA	R	R	A	R	A	R	R	A	A	R	R	A	A	A
ChrIII	9.2	R	R	A	A	R	A	A	R	R	A	A	R	A	A	R	R	R	R	A	R	NA	A	R	A	R	R	R	A	A	A	R	A	A	A	R	R	A	R	A	R	R	A	A	R	R	A	A	A
ChrIII	9.3	R	R	A	A	R	A	A	R	R	A	A	R	A	A	R	R	R	R	A	R	R	A	R	A	R	R	R	A	A	A	R	A	A	NA	R	R	A	R	A	R	R	A	A	R	R	A	A	A
ChrIII	9.4	R	R	A	A	R	A	A	R	R	A	A	R	A	A	R	R	R	R	A	R	R	A	R	A	R	R	R	A	A	A	R	A	A	A	R	R	A	R	A	R	R	A	A	R	R	A	A	A
ChrIII	9.5	R	R	A	A	R	A	NA	R	R	A	A	R	A	A	R	R	R	R	A	R	R	A	R	A	R	R	R	A	A	A	R	A	A	A	R	R	A	R	A	R	R	A	A	R	R	A	A	A
ChrIII	9.6	R	R	A	A	R	A	A	R	R	A	A	R	A	A	R	R	R	R	A	R	R	A	R	A	R	R	R	A	A	A	R	A	A	A	R	R	A	R	A	R	R	A	A	R	R	A	A	A
ChrIII	9.8	NA	R	NA	A	R	A	A	R	NA	A	A	R	A	A	R	R	NA	R	NA	NA	R	NA	R	A	NA	R	NA	A	NA	NA	R	NA	A	A	R	R	A	R	A	R	R	A	A	R	R	A	A	A
ChrIII	10	R	R	A	A	R	A	A	NA	R	A	A	R	A	A	R	R	R	R	A	R	R	A	R	A	R	NA	NA	A	A	A	R	A	A	A	R	R	A	R	A	R	R	A	A	R	R	A	A	A
ChrIII	10.1	R	R	A	A	R	A	A	R	R	A	A	R	A	A	R	R	R	R	A	R	R	A	R	A	R	R	R	A	A	A	R	A	A	A	R	R	A	R	A	R	R	A	A	R	R	A	A	A
ChrIII	10.2	R	R	A	A	R	A	A	R	R	A	A	R	A	A	R	R	R	R	A	R	R	A	R	A	R	R	R	A	A	A	R	A	A	A	R	R	A	R	A	R	R	A	A	R	R	A	A	A
ChrIII	10.3	R	R	A	A	R	A	A	R	R	A	A	R	A	A	R	R	R	R	A	R	R	A	R	A	NA	R	R	A	A	A	R	A	A	A	R	R	A	R	A	R	R	A	A	R	R	A	A	A
ChrIII	10.4	R	R	A	A	R	A	NA	R	R	A	A	R	A	A	R	R	R	R	A	R	R	A	R	A	R	R	R	A	NA	A	R	A	A	A	R	R	A	R	A	R	R	A	A	R	R	A	A	A
ChrIII	10.5	R	R	A	A	R	A	A	R	R	A	A	R	A	A	R	R	R	R	A	R	R	A	R	A	R	R	R	A	A	A	R	A	NA	NA	R	R	A	R	A	R	R	A	A	R	R	A	A	A
ChrIII	10.6	R	R	A	NA	R	A	A	R	R	A	A	R	A	A	R	R	R	R	NA	R	R	A	NA	A	R	R	R	NA	A	A	R	A	A	NA	R	R	A	R	A	R	R	A	A	R	R	A	A	A
ChrIII	10.7	R	R	A	A	R	A	A	R	R	A	A	R	A	A	R	R	R	R	A	R	R	A	R	A	R	R	R	A	A	A	R	A	A	NA	R	R	A	R	A	R	R	A	A	R	R	A	A	A
ChrIII	10.8	R	R	A	A	R	A	A	R	R	A	A	R	A	A	R	R	R	R	A	R	R	A	R	A	R	R	R	A	A	A	R	A	NA	A	R	R	NA	R	A	R	R	A	A	R	R	NA	A	A
ChrIII	10.9	R	R	A	A	R	A	NA	R	R	A	A	R	A	A	R	R	R	R	A	R	R	A	R	A	R	R	R	A	A	NA	R	A	A	A	R	R	A	R	A	R	R	A	A	R	R	A	A	A
ChrIII	11	R	R	A	A	R	A	A	R	R	A	A	R	A	A	R	R	R	R	A	R	R	A	R	A	R	R	R	A	A	A	R	A	A	A	R	R	A	R	A	R	R	A	A	R	R	A	A	A
ChrIII	11.1	R	R	A	NA	R	A	NA	R	R	A	NA	R	A	A	R	R	R	R	A	R	R	NA	R	A	R	R	R	A	A	A	R	A	NA	A	R	R	A	R	A	R	R	A	A	R	R	NA	NA	A
ChrIII	11.2	NA	R	A	A	R	A	A	NA	NA	NA	A	NA	A	A	R	NA	NA	NA	A	R	R	A	R	NA	R	R	R	A	A	A	R	A	A	A	R	R	A	R	A	R	R	NA	A	R	NA	A	A	A
ChrIII	11.3	R	R	A	A	R	A	A	R	R	A	A	R	NA	A	NA	R	R	R	A	R	R	A	R	A	R	R	R	A	NA	A	R	A	A	A	R	R	A	R	A	R	R	A	A	R	R	A	A	A
ChrIII	11.4	R	R	A	A	R	NA	A	R	R	A	NA	R	A	A	R	R	R	R	NA	R	R	NA	R	A	R	R	R	NA	A	A	R	NA	A	NA	R	R	A	R	A	R	R	A	A	R	R	A	A	A
ChrIII	11.5	R	R	NA	A	R	A	NA	R	R	A	A	R	A	A	R	R	R	R	A	R	R	NA	R	A	R	R	R	A	A	A	R	NA	A	NA	R	R	A	R	A	R	R	A	A	R	R	A	A	A
ChrIII	11.6	R	R	A	A	R	A	A	R	R	A	A	R	A	A	R	R	R	R	NA	R	R	A	R	A	R	R	R	A	A	NA	R	A	NA	A	R	R	A	R	A	R	R	A	A	R	R	A	A	A
ChrIII	11.7	R	R	A	A	R	A	A	R	R	A	A	R	A	A	R	R	R	R	A	R	R	A	R	A	R	R	R	A	A	A	R	A	A	NA	R	R	A	R	A	R	R	A	A	R	R	A	A	A
ChrIII	11.9	R	R	A	A	R	A	A	R	R	A	A	R	A	A	R	R	R	R	A	R	R	A	R	A	R	R	R	A	A	A	R	A	A	A	R	R	A	R	A	R	R	A	A	R	R	NA	A	A
ChrIII	12	R	R	A	A	R	NA	A	R	R	A	A	R	A	A	NA	R	R	R	NA	R	R	NA	R	A	R	R	NA	A	NA	NA	R	NA	A	NA	R	R	A	R	A	R	R	A	A	R	R	NA	NA	A
ChrIII	12.1	R	R	A	A	R	A	A	R	R	A	A	R	A	A	R	R	R	R	A	R	R	A	R	A	R	R	R	A	A	A	R	A	A	A	R	R	A	R	A	R	R	A	A	R	R	A	A	A
ChrIII	12.3	R	R	A	A	R	A	A	R	R	A	A	R	A	A	R	R	R	R	A	R	NA	A	R	A	R	R	R	A	A	A	R	A	A	A	R	R	A	R	A	R	R	A	A	R	R	A	A	A
ChrIII	12.4	R	R	A	A	R	A	A	NA	R	A	A	R	A	A	NA	R	R	R	A	R	R	A	R	A	R	R	R	A	A	A	R	A	A	A	R	R	A	R	A	R	R	A	A	R	R	A	A	A
ChrIII	12.5	R	R	A	A	R	A	A	R	R	A	A	R	NA	A	R	R	R	R	A	R	R	A	R	A	R	R	R	A	A	A	R	A	A	A	R	R	A	R	A	R	R	A	A	R	R	A	A	A
ChrIII	12.6	R	R	A	A	R	A	A	R	R	A	A	R	A	A	R	R	R	R	A	R	NA	A	R	A	R	R	R	A	A	A	R	A	A	A	R	R	A	R	A	R	R	A	A	R	R	A	A	A
ChrIII	12.7	R	R	A	A	R	A	A	R	R	A	A	R	A	A	R	R	R	R	A	R	NA	A	R	A	R	R	R	A	A	A	R	A	A	A	R	R	A	R	A	R	R	A	A	R	R	A	A	A
ChrIII	12.8	R	R	NA	A	R	A	NA	R	R	A	A	R	A	A	R	R	R	R	A	R	R	A	R	A	R	R	R	A	A	NA	R	A	A	NA	R	R	A	R	A	R	R	A	A	R	R	NA	A	A
ChrIII	12.9	R	R	A	A	R	A	A	R	R	A	A	R	A	A	R	R	R	R	A	R	R	A	NA	A	R	R	R	A	A	A	R	A	A	A	R	R	A	R	A	R	R	A	A	R	R	A	A	A
ChrIII	13	R	R	A	A	R	A	A	R	R	A	A	R	A	A	R	R	R	R	A	R	R	A	R	A	R	R	R	A	A	A	R	A	A	A	R	R	A	R	A	R	R	A	A	R	R	A	A	A
ChrIII	13.1	R	R	A	A	R	A	NA	R	R	A	NA	R	A	A	R	R	R	R	NA	R	R	A	R	A	R	R	R	NA	A	A	R	A	A	A	R	R	A	R	A	R	R	A	A	R	R	A	A	A
ChrIII	13.2	R	R	A	A	R	A	A	R	R	A	A	R	A	A	R	R	R	R	A	R	R	A	R	A	R	R	R	A	A	A	R	A	A	A	R	R	A	R	A	R	R	A	A	R	R	A	A	A
ChrIII	13.3	R	R	A	A	R	A	A	R	R	A	A	R	A	A	R	R	R	R	A	R	R	A	R	A	R	R	R	A	A	A	R	A	A	A	R	R	A	R	A	R	R	A	A	R	R	A	A	A
ChrIII	13.4	R	R	A	A	R	A	A	R	R	A	A	R	A	A	R	R	R	R	A	R	R	A	R	A	R	R	R	A	A	A	R	A	A	NA	R	R	A	R	A	R	R	A	A	R	R	A	A	A
ChrIII	13.5	R	R	A	A	R	A	A	NA	NA	A	A	R	A	A	R	R	R	R	A	R	R	A	R	A	R	R	R	A	A	A	R	A	A	A	R	R	A	R	A	R	R	A	A	R	R	A	A	A
ChrIII	13.7	R	R	A	A	R	NA	NA	R	R	A	A	R	A	A	R	R	R	R	NA	R	R	A	R	A	R	R	R	A	A	A	R	A	NA	A	R	R	A	R	A	R	R	A	A	R	R	A	A	A
ChrIII	13.8	R	R	A	A	R	A	A	R	R	A	A	R	A	A	R	R	R	R	A	R	R	A	R	A	R	R	R	A	A	A	R	A	A	A	R	R	A	R	A	R	R	A	A	R	R	A	A	A
ChrIII	13.9	NA	R	A	A	R	A	A	NA	NA	A	NA	R	A	A	R	R	R	R	A	R	R	A	R	NA	R	R	R	A	A	A	R	A	A	A	R	R	A	R	A	R	R	A	A	R	NA	A	A	A
ChrIII	14	NA	R	A	A	R	A	A	NA	NA	A	R	NA	A	A	R	NA	R	R	A	R	NA	A	NA	A	R	R	R	A	A	A	R	A	A	A	R	R	A	R	A	NA	R	A	A	R	NA	A	NA	A
ChrIII	14.1	R	R	A	A	R	A	A	R	R	A	R	R	A	A	R	R	R	R	A	R	R	A	R	A	R	R	R	A	A	A	R	A	A	A	R	R	A	R	A	R	R	A	A	R	R	A	A	A
ChrIII	14.2	R	R	A	A	R	A	A	R	R	A	R	R	A	A	R	R	R	R	A	R	R	A	R	A	R	R	R	A	A	A	R	A	A	A	R	R	A	R	A	R	R	A	A	R	R	A	A	A
ChrIII	14.3	R	R	A	A	R	A	NA	R	R	A	R	R	A	A	R	R	R	R	A	R	R	A	R	A	R	R	R	A	A	A	R	A	A	A	R	R	A	R	A	R	R	A	A	R	R	A	A	A
ChrIII	14.4	R	R	A	A	R	A	A	NA	R	A	R	NA	A	A	R	NA	R	R	A	R	R	A	R	A	R	R	R	A	A	A	R	A	A	A	R	R	A	R	A	R	R	A	A	R	R	A	A	A
ChrIII	14.5	NA	R	A	A	R	A	A	NA	NA	NA	R	NA	A	A	R	R	R	R	A	R	R	A	R	A	R	R	R	A	A	A	R	A	A	A	R	R	A	R	A	R	R	A	A	R	R	A	A	A
ChrIII	14.6	R	R	A	A	R	A	A	R	R	A	R	R	A	A	R	R	R	R	A	R	R	A	R	A	R	R	R	A	A	A	R	A	A	A	R	R	A	R	A	R	R	A	A	R	R	A	A	A
ChrIII	14.7	R	R	A	A	R	A	A	R	R	A	R	R	A	A	R	R	R	R	A	R	R	A	R	A	R	R	R	A	A	A	R	A	A	A	R	R	A	R	A	R	R	A	A	R	R	A	A	A
ChrIII	14.8	R	A	A	A	R	A	A	R	R	A	R	R	A	A	R	R	R	R	A	R	R	A	R	A	R	R	R	A	A	A	R	A	A	A	R	R	A	R	A	R	R	A	A	R	R	A	A	A
ChrIII	14.9	R	A	A	A	R	A	A	R	R	A	R	R	A	A	R	R	R	R	A	R	R	A	R	A	R	R	R	A	A	A	R	A	A	A	R	R	A	R	A	R	R	A	A	R	R	A	A	A
ChrIII	15	R	A	A	A	R	A	A	R	R	A	R	R	A	A	R	R	R	R	A	R	R	A	R	A	R	R	R	A	A	A	R	A	A	A	R	R	A	R	A	R	R	A	A	R	R	A	A	A
ChrIII	15.1	R	A	A	A	R	A	A	R	R	A	R	R	A	A	R	R	R	R	A	R	R	A	R	A	R	R	R	A	A	A	R	A	A	A	R	R	A	R	A	R	R	A	A	R	R	A	A	A
ChrIII	15.2	R	A	A	A	R	A	A	NA	R	A	R	R	A	A	NA	R	R	R	A	R	R	A	R	A	R	R	R	A	A	A	R	A	A	A	R	R	A	R	A	R	R	A	A	R	R	A	A	A
ChrIII	15.3	R	A	A	A	R	A	A	R	R	A	R	R	A	A	R	R	R	R	A	R	R	A	R	A	R	R	R	A	A	A	R	A	A	A	R	R	A	R	A	R	R	A	A	R	R	A	A	A
ChrIII	15.5	R	A	A	A	R	A	A	R	R	A	R	R	A	A	R	R	R	R	A	R	R	A	R	A	R	R	R	A	A	A	R	A	A	A	R	R	A	R	A	R	R	A	A	R	R	A	A	A
ChrIII	15.6	R	A	A	A	R	A	A	R	R	A	R	R	A	A	R	R	R	R	A	R	R	A	R	A	R	R	R	A	A	A	R	A	A	A	R	R	A	R	A	R	R	A	A	R	R	A	A	A
ChrIII	15.7	R	A	A	A	R	A	A	R	R	A	R	R	A	A	R	R	R	R	A	R	R	A	R	A	R	R	R	A	A	A	R	A	A	NA	R	R	A	R	A	R	R	A	A	R	R	A	A	A
ChrIII	15.8	R	A	A	A	R	A	A	R	R	A	R	R	A	A	R	R	R	R	A	R	R	A	R	A	R	R	R	A	A	A	R	A	A	A	R	R	A	R	A	R	R	A	A	R	R	A	A	A
ChrIII	15.9	R	A	A	A	R	A	A	R	R	A	R	R	A	A	R	R	R	R	A	R	R	A	R	A	R	R	R	A	A	A	R	A	A	A	R	R	A	R	A	R	R	A	A	R	R	A	A	A
ChrIII	16	R	A	A	A	R	A	A	R	R	A	R	R	A	NA	R	R	R	R	A	R	R	A	R	A	R	R	R	A	A	A	R	A	A	NA	R	R	A	R	A	R	R	A	A	R	R	A	A	A
ChrIII	16.1	R	A	A	A	R	A	A	R	R	A	R	R	A	A	R	R	R	R	A	R	NA	A	NA	A	R	R	R	A	A	A	R	A	A	A	R	R	A	R	A	R	R	A	A	R	R	A	A	A
ChrIII	16.2	R	A	A	A	R	A	A	R	R	A	R	R	A	A	R	R	R	R	A	R	R	A	R	A	NA	R	R	A	A	A	R	A	A	A	R	R	A	R	A	R	R	A	A	R	R	A	A	A
ChrIII	16.3	R	A	A	A	R	A	A	R	R	A	R	R	A	A	R	R	R	R	A	R	R	A	R	A	A	R	R	A	A	A	R	A	A	A	R	R	A	R	A	R	R	A	A	R	R	A	A	A
ChrIII	16.4	R	A	A	A	R	A	A	R	R	A	R	R	A	A	R	R	R	R	A	R	R	A	R	A	A	R	R	A	A	A	R	A	A	A	R	R	A	R	A	R	R	A	A	R	R	A	A	A
ChrIII	16.5	R	A	A	A	R	A	A	R	R	A	R	R	A	A	R	R	R	R	A	R	R	A	R	A	A	R	R	A	A	A	R	A	A	A	R	R	A	R	A	R	R	A	A	R	R	A	A	A
ChrIII	16.6	R	A	A	A	R	A	A	R	R	A	R	R	A	A	R	R	NA	R	A	R	R	A	R	A	A	R	R	A	A	A	R	A	A	A	R	R	A	R	A	R	R	A	A	R	R	A	A	A
ChrIII	16.7	R	A	A	A	R	A	NA	R	R	A	R	R	A	A	NA	R	R	R	A	R	R	A	R	A	A	R	R	A	A	A	R	A	A	A	R	R	A	R	A	R	R	A	A	R	R	A	A	A
ChrIII	16.8	R	A	A	A	R	A	R	NA	R	A	R	R	A	A	R	R	R	R	A	R	R	A	R	A	A	R	R	A	A	A	NA	A	A	A	R	R	A	R	A	R	R	A	A	R	R	A	A	A
ChrIII	16.9	R	A	A	A	R	A	R	R	R	A	R	R	A	A	R	R	R	R	A	R	R	A	R	A	A	R	R	A	A	A	R	A	A	A	R	R	A	R	A	R	R	A	A	R	R	A	A	A
ChrIII	17	R	A	A	A	R	A	R	R	R	A	R	R	A	A	R	R	R	R	A	R	R	A	R	A	A	R	R	A	A	A	R	A	A	A	R	R	A	R	A	R	R	A	A	R	R	A	A	A
ChrIII	17.1	R	A	A	NA	R	A	R	R	R	A	R	R	A	NA	R	R	R	R	NA	R	R	A	R	A	A	R	R	A	A	A	R	A	A	A	R	R	A	R	A	R	R	A	A	R	R	A	A	A
ChrIII	17.2	R	A	A	A	R	A	R	R	R	A	R	R	A	A	R	R	R	R	A	R	R	A	R	A	A	R	R	A	A	A	R	A	A	A	R	R	A	R	A	R	R	A	A	R	R	A	A	A
ChrIII	17.3	R	NA	NA	A	R	NA	R	R	R	A	R	R	A	A	R	R	R	R	A	R	R	A	R	A	A	R	R	A	A	A	R	A	NA	A	R	R	NA	R	A	R	R	A	A	R	R	A	A	A
ChrIII	17.4	R	A	A	A	R	A	R	R	R	A	R	R	A	A	NA	R	R	R	A	R	R	A	R	A	A	R	R	A	A	A	R	A	A	A	R	R	A	R	A	R	R	A	A	R	R	A	A	A
ChrIII	17.5	R	A	A	A	R	A	R	R	R	A	R	R	A	A	R	R	R	R	A	R	R	A	R	A	A	R	R	NA	A	A	R	A	NA	A	R	R	A	R	A	R	R	A	A	R	R	A	A	A
ChrIII	17.6	R	NA	A	A	R	NA	R	R	R	A	R	R	A	A	R	R	R	R	A	R	R	A	R	A	A	R	R	A	A	A	R	A	A	A	R	R	A	R	A	R	R	A	A	R	R	A	A	A
ChrIII	17.7	R	A	A	A	R	A	R	R	R	A	R	R	A	A	R	R	R	R	A	R	R	A	R	A	A	R	R	R	A	A	R	A	A	A	R	R	A	R	A	R	R	A	A	R	R	A	A	A
ChrIII	17.8	R	A	A	A	R	A	R	R	NA	A	R	R	A	A	R	R	R	R	A	R	R	A	R	A	NA	R	R	R	A	A	R	A	A	A	R	R	A	R	NA	R	R	A	A	R	NA	A	A	A
ChrIII	17.9	R	A	A	A	R	A	R	R	R	A	R	R	A	A	R	R	R	R	A	R	R	A	R	A	NA	R	R	R	A	A	R	A	NA	NA	R	R	A	R	A	R	R	A	A	R	R	A	A	A
ChrIII	18	R	A	A	A	R	A	R	R	R	A	R	R	A	A	R	R	R	R	A	R	R	A	R	A	A	R	R	R	A	A	R	A	A	A	R	R	A	R	A	R	R	A	A	R	R	A	A	A
ChrIII	18.1	NA	A	A	A	R	A	R	R	NA	A	R	NA	A	A	R	NA	R	NA	A	R	R	A	R	A	A	R	R	NA	A	A	R	A	A	A	R	R	A	R	A	R	R	A	A	R	R	A	A	A
ChrIII	18.2	R	A	A	A	R	A	R	R	R	A	R	R	A	A	NA	R	R	R	A	R	R	A	R	A	A	R	NA	R	A	A	R	A	A	A	R	R	A	R	A	R	R	A	A	R	R	A	A	A
ChrIII	18.3	R	A	A	R	R	A	R	R	R	A	R	R	A	A	R	R	R	R	A	R	R	A	R	A	NA	R	A	R	A	A	R	A	NA	A	R	R	A	R	A	R	R	A	A	R	R	A	R	A
ChrIII	18.4	R	A	A	R	R	NA	R	R	R	A	R	R	A	A	R	R	R	R	NA	R	R	A	R	A	NA	R	NA	R	A	A	R	A	NA	NA	R	R	NA	R	NA	R	R	A	A	R	R	A	R	A
ChrIII	18.7	R	A	A	NA	R	A	R	R	R	A	R	R	A	A	R	R	R	R	A	R	R	A	R	A	A	R	A	R	A	A	R	A	A	A	R	R	A	R	A	R	R	A	A	NA	R	A	R	A
ChrIII	18.8	R	A	A	R	R	A	R	R	R	A	R	R	A	A	R	R	R	R	A	R	R	A	R	A	A	R	A	R	A	A	R	A	A	NA	R	R	A	R	A	R	R	A	A	R	R	A	R	A
ChrIII	18.9	R	A	A	R	R	A	R	R	R	A	R	R	A	A	R	R	R	R	A	R	R	A	R	A	A	R	A	R	A	A	R	A	A	A	R	R	A	R	A	R	R	A	A	R	R	A	R	A
ChrIII	19	R	A	A	R	R	A	R	R	R	A	R	R	A	A	R	R	R	R	A	R	R	A	R	A	A	R	A	R	A	A	R	A	A	NA	R	R	A	R	A	R	R	A	A	R	R	A	R	A
ChrIII	19.1	R	A	A	R	R	A	R	R	R	A	R	R	A	A	R	R	R	R	A	R	R	A	R	A	A	R	A	R	A	A	R	A	A	A	R	R	A	R	A	R	R	A	A	R	R	A	R	A
ChrIII	19.4	R	A	A	R	R	A	R	R	R	A	R	R	A	A	R	R	R	R	A	R	R	A	R	A	A	R	A	R	A	A	R	A	A	A	R	R	A	R	A	R	R	A	A	R	R	A	R	A
ChrIII	19.5	R	A	A	R	R	A	R	R	R	A	R	R	A	A	R	R	R	R	A	R	R	A	R	A	A	R	A	R	A	A	R	A	A	A	R	R	A	R	A	R	R	A	A	R	R	A	R	A
ChrIII	19.6	R	A	A	R	R	A	R	R	R	A	R	R	A	A	R	R	R	R	A	R	R	A	R	A	A	R	A	R	A	A	R	A	A	A	R	R	A	R	A	R	R	A	A	R	R	A	R	A
ChrIII	19.7	R	A	A	R	R	A	R	R	R	A	R	R	A	A	R	R	R	R	A	R	R	A	R	A	A	R	A	R	A	A	R	A	A	A	R	R	A	R	A	R	R	A	A	R	R	A	R	A
ChrIII	19.8	R	A	A	R	R	A	R	R	R	A	R	R	A	A	R	NA	R	R	A	R	NA	A	R	A	A	R	A	R	A	A	R	A	A	A	R	R	A	NA	A	R	R	A	A	R	R	A	R	A
ChrIII	19.9	R	A	A	R	R	A	R	R	R	R	R	R	A	A	R	R	R	R	A	NA	R	A	R	A	A	R	A	R	A	A	R	A	A	A	R	R	A	R	A	R	R	A	A	R	R	A	R	A
ChrIII	20	R	A	A	R	R	A	R	R	R	R	R	NA	A	A	R	R	R	R	A	A	R	A	R	A	A	R	A	R	A	A	R	A	A	A	R	R	A	R	A	R	R	A	A	R	R	A	R	A
ChrIII	20.1	R	A	A	R	R	A	R	R	R	R	R	R	A	A	R	R	R	R	A	A	R	A	R	A	A	R	A	R	A	A	R	A	A	A	R	R	A	R	A	R	R	R	A	R	R	A	R	A
ChrIII	20.2	R	A	A	R	R	A	R	R	R	R	R	R	A	A	R	NA	R	R	A	A	R	A	R	A	A	R	A	R	A	A	R	A	A	A	R	R	A	R	A	R	R	R	A	R	R	A	R	A
ChrIII	20.3	R	A	A	R	R	A	R	R	R	R	R	R	A	A	R	R	R	R	A	A	R	A	R	A	NA	R	A	R	A	A	R	A	A	A	R	R	A	R	A	R	R	R	A	R	R	A	R	A
ChrIII	20.5	R	A	A	R	R	A	R	R	R	R	R	R	A	A	R	R	R	R	A	A	R	A	R	A	A	R	A	NA	A	A	R	A	A	A	R	R	A	R	A	R	R	R	A	R	R	A	R	A
ChrIII	20.6	R	A	A	R	R	A	R	R	R	R	R	R	A	A	R	R	R	R	A	A	R	A	R	A	A	R	A	R	A	A	R	A	A	A	R	R	A	R	A	R	R	R	A	R	R	A	R	A
ChrIII	20.7	R	A	A	R	R	A	R	R	R	R	R	R	A	A	R	R	R	R	A	A	R	A	R	A	A	R	A	R	A	A	R	A	A	A	R	R	A	R	A	R	R	R	A	R	R	A	R	A
ChrIII	20.8	R	A	A	R	R	A	R	R	R	R	R	R	A	A	R	R	R	R	A	A	R	A	R	A	A	R	A	R	R	A	R	A	A	A	R	R	A	R	A	R	R	R	A	R	R	A	R	A
ChrIII	20.9	R	A	A	R	R	A	R	R	R	R	R	R	A	A	R	R	R	R	A	A	R	A	R	A	A	R	A	R	R	A	R	A	NA	A	R	R	A	R	A	R	R	R	A	R	R	A	R	A
ChrIII	21	R	A	A	R	R	A	R	R	R	R	R	R	A	A	R	R	R	R	A	NA	R	A	R	A	A	R	A	R	R	A	R	A	A	A	R	R	NA	R	A	R	R	R	A	R	R	A	R	A
ChrIII	21.2	R	A	A	R	R	A	R	R	R	R	R	R	A	A	R	R	R	R	A	A	R	A	R	A	A	R	A	R	R	A	R	A	A	A	R	R	A	R	A	R	R	R	A	R	R	A	R	A
ChrIII	21.3	R	A	A	R	R	A	R	R	R	R	R	R	A	A	R	R	R	R	A	NA	R	A	R	A	A	R	A	R	R	A	R	A	A	A	R	R	A	R	A	R	R	R	A	R	R	A	R	A
ChrIII	21.4	R	A	A	R	R	A	R	R	R	R	R	R	A	A	R	R	NA	R	A	A	R	A	R	A	A	R	A	R	R	A	R	A	A	A	R	R	A	R	A	R	R	R	A	R	R	A	R	A
ChrIII	21.5	R	A	A	R	R	A	R	R	NA	NA	R	R	NA	A	R	R	R	R	A	A	R	A	R	A	A	R	A	R	R	A	NA	A	A	A	NA	R	A	R	A	R	R	NA	A	R	NA	A	NA	A
ChrIII	21.6	R	A	A	R	R	A	R	NA	R	R	R	R	A	A	R	NA	R	R	A	A	R	A	R	NA	A	R	A	R	NA	A	R	A	A	A	NA	R	A	NA	A	R	R	R	A	NA	R	A	NA	A
ChrIV	0.3	R	A	A	R	A	A	NA	A	R	A	A	R	A	R	R	A	R	R	A	A	A	R	R	A	A	A	NA	R	A	A	R	A	R	A	A	R	A	A	R	R	A	R	R	R	A	R	R	A
ChrIV	0.4	R	A	A	R	A	A	R	A	R	A	A	R	A	R	R	A	R	R	A	A	A	R	R	A	A	A	R	R	A	A	R	A	R	A	A	R	A	A	R	R	A	R	R	R	A	R	R	A
ChrIV	0.5	R	A	A	NA	A	A	NA	A	R	A	NA	R	A	NA	R	A	R	R	A	A	A	R	NA	A	A	A	NA	R	A	A	NA	A	NA	A	A	NA	A	A	R	NA	A	R	NA	R	A	NA	R	A
ChrIV	0.6	R	A	A	R	A	A	R	A	R	A	R	R	A	R	NA	A	R	R	A	A	A	R	R	A	A	A	R	R	A	A	A	A	R	A	A	R	A	A	R	R	A	R	A	R	A	R	R	A
ChrIV	0.7	R	A	A	R	A	A	R	A	R	A	R	R	A	R	R	A	R	R	A	A	A	R	R	A	A	A	R	R	A	A	A	A	R	A	A	R	A	A	R	R	A	R	A	R	A	R	R	A
ChrIV	0.8	R	NA	A	R	A	A	R	A	R	A	R	R	A	R	R	A	R	R	A	A	A	R	R	NA	A	A	R	R	A	A	A	A	R	A	A	R	A	A	R	R	A	R	A	R	A	R	R	A
ChrIV	0.9	R	A	A	R	A	NA	R	A	R	NA	R	R	A	R	R	NA	R	R	A	A	A	R	R	A	A	A	NA	R	A	A	A	A	R	A	A	R	A	A	R	R	A	R	A	R	NA	R	R	A
ChrIV	1	R	A	A	NA	A	A	R	A	R	A	R	R	A	R	R	A	R	R	A	A	A	R	R	A	A	A	NA	R	A	A	A	A	R	A	A	R	A	A	R	NA	A	R	A	R	A	NA	R	A
ChrIV	1.1	R	A	A	R	A	A	R	A	R	A	R	R	A	R	R	A	R	R	A	A	A	R	R	A	A	A	R	R	A	A	A	A	R	A	A	R	A	A	R	R	A	R	A	R	A	R	R	A
ChrIV	1.2	R	A	A	NA	A	A	NA	A	R	A	R	R	A	R	R	A	R	R	A	A	A	R	R	A	A	A	R	R	A	A	A	A	R	A	A	NA	A	A	R	R	A	R	A	R	A	R	R	A
ChrIV	2.4	R	A	A	NA	A	A	R	A	R	A	R	R	A	NA	R	A	R	R	A	A	A	R	R	A	A	A	NA	NA	A	A	A	R	R	A	A	R	A	A	R	NA	A	R	A	R	A	R	R	A
ChrIV	2.5	R	A	A	R	A	A	R	A	R	A	R	R	A	R	R	A	R	R	A	NA	A	R	R	A	NA	A	R	R	A	A	A	R	NA	A	A	R	A	A	R	R	A	R	A	R	A	NA	R	A
ChrIV	3	R	A	A	NA	A	R	NA	A	R	A	NA	R	A	NA	R	A	NA	NA	A	A	A	R	NA	A	NA	A	NA	NA	A	A	A	NA	NA	A	A	NA	A	A	NA	NA	A	NA	A	R	A	NA	R	A
ChrIV	3.6	R	A	A	R	A	R	R	A	R	A	R	R	A	R	R	A	R	R	A	A	A	R	R	A	R	A	NA	R	A	A	A	R	R	A	A	R	R	A	R	R	A	R	A	R	A	R	R	A
ChrIV	3.7	R	A	A	R	A	R	R	A	R	A	R	R	A	R	R	A	R	R	A	A	A	R	R	A	NA	A	R	R	A	A	A	R	NA	A	A	R	R	A	R	R	A	R	A	R	A	NA	R	A
ChrIV	3.9	R	A	A	NA	NA	R	NA	A	R	A	NA	R	A	NA	R	A	NA	NA	A	NA	A	R	NA	A	R	A	NA	R	A	A	A	R	R	A	A	NA	NA	A	R	NA	A	R	A	R	A	NA	R	NA
ChrIV	4	R	A	A	R	A	R	R	A	R	A	R	R	A	R	R	A	NA	R	A	A	A	R	R	A	R	A	NA	R	A	A	A	R	NA	A	A	NA	R	A	R	R	A	R	A	R	A	NA	R	A
ChrIV	4.1	R	A	A	NA	A	R	NA	A	R	A	NA	R	A	NA	R	A	NA	R	A	A	A	R	R	A	NA	A	NA	NA	A	A	A	NA	NA	A	A	NA	NA	A	NA	NA	A	NA	A	R	A	R	R	A
ChrIV	4.3	R	A	A	R	A	R	NA	A	R	NA	R	R	A	R	R	A	R	R	A	A	A	R	R	A	R	A	R	R	A	NA	A	R	R	A	A	R	R	A	R	R	A	R	A	R	A	R	R	A
ChrIV	4.4	R	A	A	R	A	R	R	NA	R	A	R	R	A	R	R	A	R	R	A	A	A	R	R	A	R	A	R	R	A	A	A	R	R	A	A	R	R	A	R	R	A	R	A	R	A	R	R	A
ChrIV	4.6	R	A	A	NA	A	R	R	A	R	A	R	R	A	A	R	A	R	NA	A	A	A	R	NA	A	NA	A	NA	NA	A	A	A	NA	NA	A	A	R	R	A	R	NA	A	NA	A	R	A	NA	R	A
ChrIV	4.7	R	A	A	NA	A	R	NA	A	R	A	NA	R	A	A	NA	A	R	NA	A	NA	A	R	NA	A	NA	A	NA	NA	A	A	A	NA	R	A	A	NA	NA	A	R	NA	A	NA	A	R	A	NA	R	A
ChrIV	4.8	R	A	A	R	A	R	R	A	R	A	R	R	A	A	R	A	R	R	A	A	A	R	R	A	R	A	R	R	A	A	A	R	R	A	A	R	R	A	R	R	A	R	A	NA	A	R	R	A
ChrIV	5.1	R	A	A	R	A	R	R	A	R	A	R	R	A	A	NA	A	R	R	A	A	A	R	R	A	NA	A	NA	R	A	A	A	R	R	A	A	R	R	A	R	NA	A	NA	A	A	A	R	R	A
ChrIV	5.2	R	A	A	R	A	R	R	A	R	A	NA	R	A	A	R	A	R	R	A	A	A	R	R	A	R	A	R	R	A	A	A	R	R	A	A	R	R	A	R	R	A	R	A	A	A	R	R	A
ChrIV	5.4	R	A	A	NA	A	R	R	A	R	NA	R	R	A	A	R	A	R	R	A	A	NA	R	R	A	R	A	R	R	A	A	A	R	R	A	A	R	NA	A	R	NA	A	R	A	A	A	NA	R	A
ChrIV	5.7	R	A	A	NA	A	R	R	A	R	R	R	R	NA	A	R	A	R	R	NA	A	A	R	R	A	R	A	NA	NA	A	A	A	R	R	A	NA	NA	R	A	R	R	NA	R	A	A	A	R	R	A
ChrIV	5.9	R	A	A	NA	A	R	R	A	R	R	NA	R	A	A	R	A	NA	NA	A	A	A	R	R	A	NA	A	R	R	A	A	A	R	NA	A	A	NA	NA	A	R	NA	A	NA	A	A	A	NA	R	A
ChrIV	6.5	R	A	A	R	A	R	NA	A	R	R	R	R	A	A	R	A	R	A	A	A	NA	R	R	A	NA	A	NA	R	A	R	A	R	NA	A	A	NA	R	A	R	NA	A	R	A	A	A	NA	A	NA
ChrIV	6.7	R	A	A	NA	A	R	NA	A	R	R	NA	R	A	A	R	A	NA	A	A	A	NA	R	NA	A	NA	A	R	R	A	R	A	NA	R	A	A	NA	NA	A	NA	NA	A	NA	A	A	A	NA	A	A
ChrIV	6.8	R	A	A	R	A	R	R	A	R	R	R	R	A	A	R	A	R	A	A	A	A	R	R	A	R	A	R	R	A	R	A	R	R	A	A	R	R	A	R	R	A	R	A	A	A	R	A	A
ChrIV	6.9	R	NA	A	R	A	R	NA	A	R	R	R	R	A	A	R	NA	R	A	A	A	A	R	R	A	R	A	R	R	A	NA	A	R	NA	NA	A	NA	R	A	R	R	A	R	A	NA	A	NA	A	A
ChrIV	7	R	A	A	R	A	R	R	A	R	R	R	R	A	A	R	A	R	A	A	A	A	R	R	A	R	A	R	R	A	R	A	R	NA	A	A	R	R	A	R	NA	A	R	A	A	A	R	A	A
ChrIV	7.1	R	A	A	R	A	R	R	A	R	R	R	R	A	A	R	A	R	A	A	A	A	R	R	A	R	A	R	R	A	R	A	R	R	A	A	R	R	A	R	R	A	R	A	A	A	NA	A	A
ChrIV	7.6	R	A	NA	R	A	R	R	A	R	R	R	R	A	A	R	A	R	A	A	A	A	R	R	A	R	A	R	R	A	R	A	R	R	A	A	R	R	A	R	R	A	R	NA	A	A	R	A	A
ChrIV	8.3	R	A	A	NA	A	R	R	A	R	R	NA	R	A	A	R	A	NA	A	A	A	A	R	NA	A	NA	A	NA	NA	A	R	A	R	NA	NA	A	R	R	NA	R	NA	NA	NA	A	A	A	NA	A	NA
ChrIV	8.7	R	A	A	NA	A	R	R	A	R	R	R	R	A	A	R	A	R	A	A	A	A	R	NA	A	R	A	R	R	A	R	A	R	R	A	A	R	NA	A	R	R	A	R	A	A	A	R	A	A
ChrIV	8.8	R	A	A	R	A	R	R	A	R	R	R	R	A	A	R	A	R	A	A	A	A	R	R	A	R	A	R	R	A	R	A	R	R	A	A	R	R	A	R	R	A	R	A	A	A	R	A	A
ChrIV	8.9	R	A	A	R	A	R	R	A	R	R	R	R	A	A	R	A	R	A	A	A	A	R	R	A	R	A	R	R	A	R	A	R	R	NA	A	R	R	A	R	R	A	R	A	A	A	R	A	A
ChrIV	9	R	A	A	R	A	R	R	A	R	R	R	R	A	A	R	A	R	A	A	A	A	R	R	A	R	A	R	R	A	R	A	R	R	A	A	R	R	A	R	R	A	R	A	A	A	R	A	A
ChrIV	9.1	R	A	A	R	A	R	R	A	R	R	R	R	A	A	R	A	R	A	A	A	A	R	R	A	R	A	R	R	A	R	A	R	R	A	A	R	R	A	R	R	A	R	A	A	A	R	A	A
ChrIV	9.6	R	A	A	R	A	R	NA	A	R	R	R	R	A	A	R	A	R	A	A	A	A	R	NA	A	R	A	NA	R	A	R	A	R	NA	A	A	NA	R	A	R	NA	A	R	A	A	A	NA	A	A
ChrIV	9.7	R	A	A	R	A	R	R	A	R	R	R	R	A	A	R	A	R	A	A	A	A	R	R	A	R	A	R	R	A	R	A	R	R	A	A	R	R	A	R	R	A	R	A	A	A	NA	A	A
ChrIV	9.8	R	A	A	R	A	R	NA	A	R	R	R	R	A	A	R	A	R	A	A	A	A	R	R	A	R	A	R	R	A	R	A	R	NA	A	A	R	R	A	R	R	A	R	A	A	A	R	A	A
ChrIV	9.9	R	A	A	R	A	R	R	A	R	R	R	R	A	A	R	A	R	A	A	A	A	R	R	A	R	A	R	R	A	R	A	R	R	A	A	R	R	A	R	R	A	R	A	A	A	R	A	A
ChrIV	10	R	A	A	R	A	R	R	A	R	R	R	R	A	A	R	A	R	A	A	A	A	R	R	A	R	A	R	R	A	R	A	R	R	A	A	R	R	A	R	R	A	R	A	A	A	R	A	A
ChrIV	10.1	R	A	A	NA	A	R	R	A	R	R	NA	R	NA	A	R	A	R	A	A	NA	NA	R	R	A	R	A	NA	NA	A	R	A	R	NA	A	A	NA	R	A	R	R	A	R	A	A	A	NA	A	A
ChrIV	10.3	R	A	A	R	A	R	R	A	R	R	R	R	A	A	R	A	R	A	A	A	NA	R	R	A	R	A	NA	R	A	R	A	R	R	NA	A	R	R	A	R	R	A	R	A	A	A	NA	A	A
ChrIV	10.4	R	A	A	R	A	R	R	A	R	R	R	R	A	A	R	A	R	A	A	A	A	R	R	A	R	A	R	R	A	R	A	R	R	A	A	R	R	A	R	R	A	R	A	A	A	R	A	A
ChrIV	10.5	R	A	A	R	A	R	R	A	R	R	R	R	A	A	R	NA	R	A	A	A	A	R	R	A	R	A	R	R	A	R	A	R	R	A	A	R	R	A	R	R	A	R	A	A	A	R	A	A
ChrIV	10.6	R	A	A	R	A	R	R	A	R	R	R	R	A	A	R	A	R	A	A	A	A	R	R	A	R	A	R	R	A	R	A	R	R	A	A	R	R	A	R	R	A	R	A	A	A	R	A	A
ChrIV	10.7	R	A	A	R	A	R	R	A	R	R	R	R	A	A	R	A	R	A	A	A	A	R	R	A	R	A	R	R	A	R	A	R	NA	A	A	R	R	A	R	R	A	R	A	A	A	R	A	A
ChrIV	10.8	R	A	A	R	A	R	R	A	R	R	R	R	A	A	R	A	R	A	A	A	A	R	R	A	R	A	R	R	A	R	A	R	R	A	A	R	R	A	R	R	A	R	A	A	A	R	A	A
ChrIV	11.1	R	A	A	R	A	R	R	A	R	R	R	R	A	A	R	A	R	A	A	A	A	R	R	A	R	A	R	R	A	R	A	R	R	A	A	R	R	A	R	R	A	R	A	A	A	R	A	A
ChrIV	11.2	R	A	A	R	A	R	R	A	R	R	R	R	A	A	R	A	R	A	A	A	A	R	R	A	R	A	R	R	A	R	A	R	R	A	A	R	R	A	R	R	A	R	A	A	A	NA	A	A
ChrIV	11.3	R	A	A	R	A	R	R	A	R	R	R	R	A	A	R	A	NA	A	A	A	A	R	R	A	NA	A	R	R	A	R	A	R	R	A	A	R	R	A	R	R	A	R	A	A	A	R	A	A
ChrIV	11.4	R	A	A	R	A	R	R	A	R	R	R	R	A	A	R	A	R	A	A	A	A	R	R	A	R	A	R	R	A	R	A	R	R	A	A	R	R	A	R	R	A	R	A	A	A	R	A	A
ChrIV	11.5	R	A	A	R	A	R	R	NA	R	R	R	R	A	A	R	NA	R	A	A	A	A	R	R	A	R	A	R	R	A	R	A	R	R	A	A	R	R	A	R	R	A	R	A	A	A	R	A	A
ChrIV	11.6	R	NA	NA	R	A	R	R	A	R	R	R	R	A	A	R	NA	R	A	A	NA	NA	R	R	NA	R	A	R	R	NA	R	A	R	R	A	A	R	R	A	R	R	A	R	NA	NA	NA	R	A	A
ChrIV	11.7	R	A	A	R	A	R	R	A	R	R	R	R	A	A	R	A	R	A	A	A	A	R	R	A	R	A	R	R	A	R	A	R	R	A	A	R	R	A	R	R	A	R	A	A	A	R	A	A
ChrIV	11.8	R	A	A	R	A	R	R	A	R	R	R	R	A	A	R	A	R	A	A	A	A	R	R	A	R	A	R	R	A	R	A	R	R	A	A	R	R	A	R	R	A	R	A	A	A	R	A	A
ChrIV	11.9	R	A	A	R	A	R	R	A	R	R	R	R	A	A	NA	A	R	A	A	A	A	R	NA	A	R	A	R	R	A	R	A	R	R	A	A	R	R	A	R	R	A	R	A	A	A	R	A	A
ChrIV	12.1	R	A	A	R	A	R	R	A	R	R	R	R	A	A	R	NA	R	A	A	A	A	R	R	A	R	A	R	R	A	R	A	R	R	A	A	R	R	A	R	R	A	R	A	A	A	R	A	A
ChrIV	12.3	R	A	A	R	A	R	R	A	R	R	R	R	A	A	R	A	R	A	A	A	A	R	R	A	R	A	R	R	A	R	A	R	R	A	A	R	R	A	R	R	A	R	A	A	A	R	A	A
ChrIV	12.4	R	A	A	R	A	R	R	A	R	R	R	R	A	A	R	A	R	A	A	A	A	R	R	A	NA	A	R	R	A	R	A	R	R	A	A	R	R	A	R	R	A	R	A	A	A	R	A	A
ChrIV	12.5	R	A	A	R	A	R	R	A	R	R	R	R	A	A	R	A	R	A	A	A	A	R	R	A	R	A	R	R	A	R	A	R	R	A	A	R	R	A	R	R	A	R	A	A	A	R	A	A
ChrIV	12.6	R	A	A	R	A	R	R	NA	R	R	R	R	A	A	R	A	R	A	A	NA	NA	R	R	A	R	A	R	R	A	R	A	R	R	A	A	R	R	A	R	R	A	R	A	A	A	R	A	A
ChrIV	12.7	R	A	A	R	A	R	R	A	R	R	R	R	A	A	R	A	R	A	A	A	A	R	R	A	R	A	NA	R	A	R	A	R	R	A	A	R	R	A	R	R	A	R	A	NA	A	R	A	A
ChrIV	12.8	R	A	A	R	A	R	R	A	R	R	R	R	A	A	R	A	R	A	A	A	A	R	R	A	R	A	R	R	A	R	A	R	R	A	A	R	R	A	R	R	A	R	A	A	A	R	A	A
ChrIV	12.9	R	A	A	NA	NA	R	R	A	R	R	R	R	A	A	R	A	R	A	A	A	A	R	NA	A	R	A	NA	R	A	R	A	R	NA	A	A	R	R	A	R	NA	A	R	A	A	A	R	A	A
ChrIV	13	R	A	A	R	A	R	R	A	R	R	R	R	A	A	R	A	R	A	A	A	A	R	R	A	R	A	NA	R	A	R	A	R	R	A	A	R	R	A	R	R	A	R	A	A	A	NA	A	A
ChrIV	13.1	R	A	A	R	A	R	R	A	R	R	R	R	A	A	R	A	R	A	A	A	A	R	R	A	R	A	R	R	A	R	A	R	R	A	A	R	R	A	R	R	A	R	A	A	A	R	A	A
ChrIV	13.2	R	A	A	R	A	R	NA	A	R	R	R	R	A	A	R	A	R	A	A	A	A	R	NA	A	R	A	NA	R	A	R	A	R	R	A	A	R	R	A	R	R	A	R	A	A	A	R	A	A
ChrIV	13.3	R	A	A	R	A	R	R	A	R	R	R	R	A	A	R	A	R	A	A	A	A	R	R	A	R	A	R	R	A	R	A	R	R	A	A	R	R	A	R	R	A	R	A	A	A	R	A	A
ChrIV	13.4	R	A	A	R	A	R	R	A	R	R	R	R	A	A	R	NA	R	A	A	A	A	R	R	A	R	A	R	R	A	R	A	R	R	A	A	R	R	A	R	R	A	R	A	A	A	R	A	A
ChrIV	13.5	R	A	A	R	A	R	R	A	R	R	R	R	A	A	R	A	R	A	A	A	A	R	R	A	R	A	R	R	A	R	A	R	R	A	A	R	R	A	R	R	A	R	A	A	A	R	A	A
ChrIV	13.6	R	A	A	R	A	R	R	A	R	R	R	R	A	A	R	A	R	A	A	A	A	R	R	A	R	A	R	R	A	R	A	R	R	A	A	R	R	A	R	NA	A	R	A	A	A	R	A	A
ChrIV	13.7	R	A	A	R	A	R	R	A	R	R	R	R	A	A	R	A	R	A	A	A	A	R	R	A	R	A	R	R	A	R	A	R	R	A	A	R	R	A	R	R	A	R	A	A	A	R	A	A
ChrIV	13.8	R	A	A	R	A	R	R	A	R	R	R	R	A	A	R	A	R	A	A	A	A	R	R	A	NA	A	R	R	A	R	A	R	R	A	A	R	R	A	R	R	A	R	A	A	A	R	A	A
ChrIV	13.9	R	A	A	R	A	R	R	A	R	R	R	R	A	A	R	A	R	A	A	A	A	R	R	A	R	A	R	R	A	R	A	R	R	A	A	R	R	A	R	R	A	R	A	A	A	R	A	A
ChrIV	14	R	A	A	R	A	R	R	A	R	R	R	R	A	A	R	A	R	A	A	A	A	R	R	A	R	A	R	R	A	R	A	R	R	A	A	R	R	A	R	R	A	R	A	A	A	R	A	A
ChrIV	14.1	R	A	A	R	A	R	R	A	R	R	R	R	A	NA	R	NA	R	A	A	A	NA	R	R	NA	R	A	R	R	A	R	A	R	R	A	A	R	R	A	R	R	A	R	A	A	NA	R	A	A
ChrIV	14.2	R	A	A	R	A	R	R	A	R	R	R	R	A	A	R	A	R	A	A	A	A	R	R	A	R	A	R	R	A	R	A	R	R	A	A	R	R	A	R	R	A	R	A	A	A	R	A	A
ChrIV	14.3	R	A	A	R	A	R	R	A	R	R	R	R	A	A	R	A	R	A	A	A	A	R	R	A	R	A	R	R	A	R	A	R	R	A	A	R	R	A	R	R	A	R	A	A	A	R	A	A
ChrIV	14.4	R	A	A	R	A	R	R	A	R	R	R	R	A	A	R	A	NA	A	A	A	A	R	R	A	R	A	NA	R	A	R	A	R	R	A	A	R	R	A	R	R	A	R	A	A	A	R	A	A
ChrIV	14.5	R	A	A	R	A	R	R	NA	R	R	R	R	A	A	R	A	R	A	A	A	A	R	R	A	R	A	R	R	A	R	A	R	NA	A	A	R	R	A	R	R	A	R	A	A	A	R	A	A
ChrIV	14.6	R	A	A	R	A	R	R	A	R	R	R	R	A	A	R	A	R	A	A	A	A	R	R	A	R	A	R	R	A	R	A	R	R	A	A	R	R	A	R	R	A	R	A	A	A	R	A	A
ChrIV	14.7	R	NA	NA	R	A	R	R	A	R	R	R	R	A	A	R	NA	R	A	A	A	NA	R	R	NA	R	A	NA	R	A	R	NA	R	R	A	A	R	R	A	R	R	A	R	NA	NA	A	NA	NA	A
ChrIV	14.8	R	A	A	R	A	R	R	A	R	R	R	R	A	A	R	A	R	A	A	A	A	R	R	A	R	A	R	R	A	R	A	R	R	A	A	R	R	A	R	R	A	R	A	A	A	R	A	A
ChrIV	14.9	R	A	A	R	A	R	R	A	R	R	R	R	A	A	R	A	R	A	A	NA	A	R	R	A	R	A	R	R	A	R	A	R	R	A	A	R	R	A	R	R	A	R	A	A	A	NA	A	A
ChrIV	15	R	A	A	R	A	R	R	A	R	R	R	R	A	A	R	A	R	A	A	A	A	R	R	A	R	A	R	R	A	R	A	R	R	A	A	R	R	A	R	R	A	R	A	A	A	R	A	A
ChrIV	15.1	R	A	A	R	A	R	R	A	R	R	R	R	A	A	R	A	R	A	A	A	A	R	R	A	R	A	R	R	A	R	A	R	R	A	A	R	R	A	R	R	A	R	A	A	A	R	A	A
ChrIV	15.2	R	A	A	R	A	R	R	A	R	R	R	R	A	A	R	A	R	A	A	A	A	R	R	A	R	A	R	R	A	R	A	R	R	A	A	R	R	A	R	R	A	R	A	A	A	R	A	A
ChrIV	15.3	R	A	A	R	A	R	R	A	R	R	R	R	A	A	R	A	R	A	A	A	A	R	R	A	R	A	R	R	A	R	A	R	R	A	A	R	R	A	R	R	A	R	A	A	A	R	A	A
ChrIV	15.4	R	A	A	R	A	R	R	A	R	R	R	R	A	A	R	A	R	A	A	A	A	R	R	A	R	A	R	R	A	R	A	R	R	A	A	R	R	A	R	R	A	R	A	A	A	R	A	A
ChrIV	15.5	R	A	A	R	A	R	R	A	R	R	R	R	A	A	R	NA	R	A	A	A	A	R	R	A	R	A	R	R	A	R	A	R	R	A	A	R	R	A	R	R	A	R	A	A	A	R	A	A
ChrIV	15.6	R	A	A	R	A	R	R	A	R	R	R	R	A	A	R	A	R	A	A	A	A	R	R	A	R	A	R	R	A	R	A	R	R	A	A	R	R	A	R	R	A	R	A	A	A	R	A	A
ChrIV	15.7	R	A	A	R	A	R	R	A	R	R	R	R	A	A	R	A	R	A	A	A	A	R	R	A	R	A	R	R	A	R	A	R	R	A	A	R	R	A	R	R	A	R	A	A	A	R	A	A
ChrIV	15.8	R	A	A	R	A	R	R	A	R	R	R	R	A	A	R	A	R	A	A	A	A	R	R	A	R	A	R	R	A	R	A	R	R	A	A	R	R	A	R	R	A	R	A	A	A	R	A	A
ChrIV	15.9	R	A	A	R	A	R	R	A	R	R	R	R	A	A	R	A	R	A	A	A	A	R	R	A	R	A	R	R	A	R	A	R	NA	A	A	R	R	A	R	R	A	R	A	A	A	R	A	A
ChrIV	16	R	A	A	R	A	R	R	A	R	R	R	R	A	A	R	A	R	A	A	NA	A	R	R	A	R	A	R	R	A	R	A	R	R	A	A	R	R	A	R	R	A	R	A	A	A	R	A	A
ChrIV	16.1	R	A	A	R	A	R	R	A	R	R	R	R	A	A	R	NA	R	A	A	A	NA	R	R	A	R	A	R	R	A	R	A	R	R	A	A	R	R	A	R	R	A	R	A	A	A	R	A	A
ChrIV	16.2	R	A	A	R	A	R	R	A	R	R	R	R	A	A	R	A	R	A	A	A	A	R	R	A	R	A	R	R	A	R	A	R	R	A	A	R	R	A	R	R	A	R	A	A	A	R	A	A
ChrIV	16.3	R	A	A	R	A	R	R	A	R	R	R	R	A	A	R	A	R	A	A	A	A	R	R	A	R	A	NA	R	A	R	A	R	R	A	A	R	R	A	R	R	A	R	A	A	A	R	A	A
ChrIV	16.4	R	A	A	R	A	R	R	A	R	R	R	R	A	A	R	A	R	A	A	A	A	R	R	A	R	A	R	NA	A	R	A	R	R	A	A	R	R	A	R	R	A	R	A	A	A	R	A	A
ChrIV	16.5	R	A	A	R	A	R	R	A	R	R	R	R	A	A	R	A	R	A	A	A	A	R	R	A	R	A	R	A	A	R	A	R	R	A	A	R	R	A	R	R	A	R	A	A	A	R	A	A
ChrIV	16.6	R	NA	NA	R	A	R	R	A	R	R	R	R	NA	A	R	NA	R	NA	A	A	A	R	R	NA	R	A	R	NA	NA	R	A	R	NA	NA	A	R	R	A	R	R	A	R	NA	NA	NA	R	NA	A
ChrIV	16.7	R	A	A	R	A	R	R	A	R	R	R	R	A	A	R	A	R	A	A	A	NA	R	R	A	R	A	NA	A	A	R	A	R	NA	A	A	R	R	A	R	NA	A	R	A	A	A	R	A	A
ChrIV	16.8	R	A	A	R	A	R	R	A	R	R	R	R	A	A	R	A	R	A	A	A	A	R	R	A	R	A	R	A	A	R	A	R	R	A	A	R	R	A	R	R	A	R	A	A	A	R	A	A
ChrIV	16.9	R	A	A	R	A	R	R	A	R	R	R	R	A	A	R	A	R	A	A	A	A	R	R	A	R	A	R	A	A	R	A	R	R	A	A	R	R	A	R	R	A	R	A	A	A	R	A	A
ChrIV	17	R	A	A	R	A	R	R	A	R	R	R	R	NA	A	NA	NA	R	A	A	A	A	R	R	A	R	A	R	A	A	R	A	R	R	NA	A	R	R	A	R	R	A	R	A	A	A	R	A	A
ChrIV	17.1	R	A	A	NA	A	R	NA	A	R	R	R	R	A	A	R	A	R	A	A	NA	A	R	NA	A	NA	NA	NA	A	A	NA	A	NA	NA	A	A	NA	R	A	R	NA	A	R	A	A	A	R	A	A
ChrIV	17.2	R	A	A	R	A	R	R	A	R	R	R	R	A	A	R	A	R	A	A	A	A	R	R	A	R	A	R	A	A	R	A	R	R	A	A	R	R	A	R	R	A	R	A	A	A	R	A	A
ChrIV	17.3	R	NA	A	R	A	R	R	A	R	R	R	R	A	A	R	NA	R	A	NA	A	A	R	R	NA	R	NA	R	A	A	R	A	R	R	A	A	R	R	A	R	R	A	R	NA	NA	NA	R	A	A
ChrIV	17.4	R	A	NA	R	A	R	R	NA	R	R	R	R	NA	A	R	NA	R	A	NA	A	A	R	R	NA	R	A	R	NA	A	R	A	R	R	A	NA	R	R	A	R	R	NA	R	A	NA	A	R	A	A
ChrIV	17.5	R	NA	NA	R	A	R	R	A	R	R	R	R	A	A	R	A	R	A	A	A	A	R	R	NA	R	A	R	NA	A	R	A	R	R	A	A	R	R	A	R	R	A	R	A	NA	NA	R	NA	A
ChrIV	17.6	R	A	A	R	A	R	R	NA	R	R	R	R	A	A	R	A	R	A	A	A	A	R	R	NA	R	A	R	A	A	R	A	R	R	NA	A	R	R	A	R	R	A	R	NA	NA	NA	R	NA	A
ChrIV	17.7	R	A	A	R	A	R	R	A	R	R	R	R	A	A	R	NA	R	A	A	A	A	R	R	A	R	A	R	A	A	R	A	R	R	A	A	R	R	A	R	R	A	R	A	A	A	R	A	A
ChrIV	17.8	R	NA	NA	R	A	R	R	A	R	R	R	R	A	A	R	NA	R	A	A	A	A	R	R	NA	R	NA	R	A	A	R	A	R	R	A	A	R	R	A	R	R	A	R	NA	A	A	R	NA	A
ChrIV	17.9	R	NA	NA	R	A	R	R	NA	R	R	R	R	A	A	R	A	R	NA	A	A	NA	R	R	NA	R	A	R	A	A	R	A	R	R	A	A	R	R	A	R	R	NA	R	NA	NA	A	R	NA	A
ChrIV	18	R	NA	NA	R	A	R	R	NA	R	R	R	R	A	A	R	NA	R	A	A	NA	A	R	R	NA	R	A	R	A	A	R	A	R	R	A	A	R	R	A	R	R	A	R	A	A	NA	R	A	A
ChrIV	18.2	R	A	A	R	A	R	R	A	R	R	R	R	A	A	R	NA	R	A	A	A	NA	R	R	A	R	A	R	A	A	R	A	R	R	A	A	R	R	A	R	R	A	R	A	A	NA	R	A	A
ChrIV	18.3	R	A	A	R	A	R	R	A	R	R	R	R	A	A	R	A	R	A	A	A	A	R	R	A	R	A	R	A	A	R	A	R	R	A	A	R	R	A	R	R	A	R	A	A	A	R	A	A
ChrIV	18.4	R	A	A	R	A	R	R	A	R	R	R	R	A	A	NA	NA	R	A	A	A	A	R	R	A	R	A	R	A	A	R	A	R	R	A	A	R	R	A	R	R	A	R	A	A	A	R	A	A
ChrIV	18.5	R	NA	A	R	A	R	R	A	R	R	R	R	A	A	R	A	R	A	A	NA	A	R	R	A	R	A	R	A	A	R	A	R	R	A	A	R	R	A	R	R	A	R	NA	NA	NA	R	A	A
ChrIV	18.6	R	A	A	R	A	R	R	NA	R	R	R	R	A	A	R	A	R	A	A	A	NA	R	R	A	R	A	R	A	A	R	A	R	R	A	A	R	R	A	R	R	A	R	A	A	A	R	A	A
ChrIV	18.8	R	A	A	R	A	R	R	A	R	R	R	R	A	A	R	NA	R	A	A	A	A	R	R	A	R	A	R	A	A	R	A	R	R	A	A	R	R	A	R	R	A	R	A	A	A	R	A	A
ChrIV	18.9	R	A	A	R	A	R	R	A	R	R	R	R	A	A	R	A	R	A	A	NA	A	R	R	A	R	A	R	A	A	R	A	R	R	A	A	R	R	A	R	R	A	R	A	A	A	R	A	A
ChrIV	19.1	R	A	A	R	A	R	R	A	R	R	R	R	A	A	R	NA	R	A	A	A	A	R	R	A	R	A	R	A	A	R	A	R	R	A	A	R	R	A	R	R	A	R	A	A	A	R	A	A
ChrIV	19.2	R	A	A	R	A	R	R	A	R	R	R	R	A	A	R	A	R	A	A	A	A	R	R	A	R	A	R	A	A	R	A	R	R	A	A	R	R	A	R	R	A	R	A	A	A	R	A	A
ChrIV	19.3	R	A	A	R	A	R	R	A	R	R	R	R	A	A	R	A	R	A	A	A	A	R	R	A	R	A	R	A	A	R	A	R	R	A	A	R	R	A	R	R	A	R	A	A	A	R	A	A
ChrIV	19.4	R	A	A	R	A	R	R	A	R	R	R	R	A	A	R	A	R	A	A	A	A	R	R	A	R	A	R	A	A	R	A	R	R	A	A	R	R	A	R	R	A	R	A	A	A	R	A	A
ChrIV	19.5	R	A	A	R	A	R	R	A	R	R	R	R	A	A	R	NA	R	A	A	A	A	R	R	A	R	A	R	A	A	R	A	R	R	A	A	R	R	A	R	R	A	R	A	A	A	R	A	A
ChrIV	19.6	R	A	A	R	A	R	R	A	R	R	R	R	A	A	R	A	R	A	A	A	A	R	R	A	R	A	NA	A	A	R	A	R	R	A	A	R	R	A	R	R	A	R	A	A	A	R	A	A
ChrIV	19.7	R	A	A	R	A	R	R	A	R	R	R	R	A	A	R	A	R	A	A	A	A	R	R	A	R	A	R	A	A	R	A	R	R	A	A	R	R	A	R	R	A	R	A	A	A	R	A	A
ChrIV	19.8	R	A	A	R	A	R	R	A	R	R	R	R	A	A	R	A	R	A	A	A	A	R	R	A	R	A	R	A	A	R	A	R	NA	A	A	R	R	A	R	R	A	R	A	A	A	NA	A	A
ChrIV	19.9	R	A	A	R	A	R	R	A	R	R	R	R	A	A	R	A	R	A	A	A	A	R	R	A	R	A	NA	A	A	R	A	R	R	A	A	R	R	A	R	R	A	R	A	A	A	NA	A	A
ChrIV	20	R	A	A	R	A	R	R	A	R	R	R	R	A	A	R	A	R	A	A	A	A	R	R	A	R	A	R	A	A	R	A	R	R	A	A	R	R	A	R	R	A	R	A	A	A	R	A	A
ChrIV	20.1	R	A	A	R	A	R	R	A	R	R	R	R	A	A	NA	A	R	A	A	A	A	R	R	A	R	A	R	A	A	R	A	R	R	A	A	R	R	A	R	R	A	R	A	A	A	R	A	A
ChrIV	20.2	R	A	A	R	A	R	R	A	R	R	R	R	A	A	A	A	R	A	A	A	A	R	R	A	R	A	R	A	A	R	A	R	R	A	A	R	R	A	R	R	A	R	A	A	A	R	A	A
ChrIV	20.3	R	A	A	R	A	R	R	A	R	R	R	R	A	A	A	A	R	A	A	A	A	R	R	A	R	A	NA	A	A	R	A	R	R	A	A	R	R	A	R	R	A	R	A	A	A	NA	A	A
ChrIV	20.4	R	A	A	R	A	R	R	A	R	R	R	R	A	A	A	A	R	A	A	A	A	R	R	A	R	A	NA	A	A	R	A	R	R	A	A	R	R	A	R	R	A	R	A	A	A	NA	A	A
ChrIV	20.5	R	A	A	R	A	R	R	A	R	R	R	R	A	A	A	A	R	A	A	A	A	R	R	A	R	A	R	A	A	R	A	R	R	A	A	R	R	A	R	R	A	R	A	A	A	R	A	A
ChrIV	20.6	R	A	A	R	A	R	R	A	R	R	R	R	A	A	A	A	R	A	A	A	A	R	NA	A	R	A	R	A	A	R	A	R	R	A	A	R	R	A	R	R	A	R	A	A	A	R	A	A
ChrIV	20.7	R	A	A	R	NA	R	NA	NA	R	R	R	R	A	A	A	NA	R	NA	A	NA	A	R	R	A	R	NA	R	A	A	R	NA	R	R	A	NA	R	R	NA	R	R	NA	R	A	NA	NA	R	A	A
ChrIV	20.8	R	A	A	R	A	R	R	A	R	R	R	R	A	A	A	A	R	A	A	A	A	R	R	A	R	A	R	A	A	R	A	R	R	A	A	R	R	A	R	R	A	R	A	A	A	R	A	A
ChrIV	20.9	R	A	A	R	A	R	R	A	R	R	R	R	A	A	A	A	R	A	A	A	A	R	R	A	R	A	R	A	A	R	A	R	R	A	A	R	R	A	R	R	A	R	A	A	A	R	A	A
ChrIV	21	R	A	A	R	A	R	R	A	R	R	R	R	A	A	A	A	R	A	A	A	A	R	R	A	R	A	R	A	A	R	A	R	R	A	A	R	R	A	R	R	A	R	A	A	A	R	A	A
ChrIV	21.1	R	A	A	R	A	R	R	A	R	R	R	R	A	A	A	A	R	A	A	A	A	R	R	A	R	A	R	A	A	R	A	R	R	A	A	R	R	A	R	R	A	R	A	A	A	R	A	A
ChrIV	21.2	R	A	A	R	A	R	R	A	R	R	R	R	A	A	A	A	R	A	A	A	A	R	R	A	R	A	R	A	A	R	A	R	R	A	A	R	R	A	R	R	A	R	A	A	A	R	A	A
ChrIV	21.3	R	A	A	R	A	R	R	A	R	R	R	R	A	A	NA	A	R	A	A	A	A	R	R	A	R	A	R	A	A	R	A	R	R	A	A	R	R	A	R	R	A	R	A	A	A	R	A	A
ChrIV	21.4	R	A	A	R	A	R	R	A	R	R	R	R	A	A	A	A	R	A	A	A	A	R	R	A	R	A	R	A	A	R	A	R	R	A	A	R	R	A	R	R	A	R	A	A	A	R	A	A
ChrIV	21.5	R	NA	A	R	A	R	R	A	R	R	R	R	A	A	NA	A	NA	A	A	A	A	R	R	A	R	A	R	A	A	R	A	R	R	A	A	R	R	A	R	R	A	R	A	A	A	R	A	A
ChrIV	21.6	R	A	A	R	A	R	R	A	R	R	R	R	A	A	A	A	R	A	A	A	A	R	R	A	R	A	R	A	A	R	A	R	R	A	A	R	R	A	R	R	A	R	A	A	A	R	A	A
ChrIV	21.7	R	A	A	R	A	R	R	A	R	R	NA	R	A	A	A	A	R	A	A	A	A	R	R	A	NA	A	R	A	A	R	A	NA	NA	A	A	NA	R	A	R	R	A	R	A	A	A	NA	A	A
ChrIV	21.8	R	A	A	R	A	R	R	A	R	R	R	R	A	NA	A	A	NA	A	A	A	A	R	R	A	R	A	R	A	A	R	A	NA	NA	A	A	NA	R	A	R	R	A	R	A	A	A	R	A	A
ChrIV	21.9	R	A	A	R	A	R	R	A	R	R	R	R	A	NA	A	A	R	A	A	A	NA	R	R	A	R	A	R	A	A	R	A	R	R	NA	A	R	R	A	R	R	A	R	A	A	A	R	A	A
ChrIV	22	R	A	A	NA	A	R	R	A	R	R	NA	R	A	A	A	A	R	A	NA	A	A	R	R	A	NA	A	R	A	A	R	A	NA	NA	A	A	NA	R	A	R	R	NA	NA	A	A	A	NA	A	A
ChrIV	22.1	R	A	A	R	A	R	R	A	R	R	R	R	A	A	A	A	NA	A	A	A	A	R	R	A	R	A	R	A	A	R	A	R	R	A	A	R	R	A	R	R	A	R	A	A	A	R	A	A
ChrIV	22.2	R	A	A	R	A	R	R	A	R	R	R	R	A	A	A	A	R	A	A	A	A	R	R	A	R	A	R	A	A	R	A	R	R	A	A	R	R	A	R	R	A	R	A	A	A	R	A	A
ChrIV	22.3	R	A	A	R	A	R	R	A	R	R	R	R	A	A	A	NA	R	A	A	A	A	R	R	A	R	A	R	A	A	R	A	R	NA	A	A	R	R	A	R	R	A	R	A	A	A	R	A	A
ChrIV	22.4	R	A	A	R	A	R	R	A	R	R	R	R	A	A	A	A	R	A	A	A	A	R	R	A	R	A	R	A	A	R	A	R	R	A	A	R	R	A	R	R	A	R	A	A	A	R	A	A
ChrIV	22.5	R	A	A	R	A	R	R	A	R	R	R	R	A	A	NA	A	R	A	A	A	A	R	R	A	R	A	R	A	A	R	A	R	R	A	A	R	R	A	R	R	A	R	A	A	A	R	A	A
ChrIV	22.6	R	A	A	R	A	R	R	A	R	R	R	R	A	A	A	A	R	A	A	A	A	R	R	A	R	A	R	A	A	R	A	R	R	A	A	R	R	A	R	R	A	R	A	A	A	R	A	A
ChrIV	22.7	R	A	A	R	A	R	R	A	R	R	R	R	A	A	A	A	R	A	A	A	A	R	R	A	R	A	R	A	A	R	A	R	R	A	A	R	R	A	R	R	A	R	A	A	A	R	A	A
ChrIV	22.8	R	A	A	R	A	R	R	A	R	R	R	R	A	A	A	A	R	A	A	A	A	R	R	A	R	A	R	A	A	R	A	R	R	A	A	R	R	A	R	R	A	R	A	A	A	R	A	A
ChrIV	22.9	R	A	A	R	A	R	R	A	R	R	R	R	A	A	A	A	R	A	A	A	A	R	R	A	R	A	R	A	A	R	A	R	R	A	A	R	R	A	R	R	A	R	A	A	A	R	A	A
ChrIV	23	R	A	A	R	A	R	R	A	R	R	R	R	A	A	A	A	R	A	A	A	NA	R	NA	A	R	A	R	A	A	R	A	R	NA	A	A	NA	R	A	R	R	A	R	A	A	A	R	A	A
ChrIV	23.1	R	A	A	R	A	R	R	A	R	R	R	R	A	NA	NA	A	R	A	A	A	A	R	R	A	R	A	R	A	R	R	A	R	R	A	A	R	R	A	R	R	A	R	A	A	A	R	A	A
ChrIV	23.2	R	A	A	R	A	R	R	A	R	R	R	R	A	A	A	A	R	A	A	A	A	R	R	A	R	A	R	A	R	R	A	R	R	A	A	R	R	A	R	R	A	R	A	A	A	R	A	A
ChrIV	23.3	R	A	A	R	A	R	R	A	R	R	R	R	A	A	A	A	R	A	A	A	A	R	R	A	R	A	R	A	R	R	A	R	R	A	A	R	R	A	R	R	A	R	A	A	A	NA	A	A
ChrIV	23.4	R	A	A	R	A	R	R	A	R	R	R	R	A	A	A	A	R	A	A	A	A	R	R	A	R	A	R	A	R	R	A	R	R	A	A	R	R	A	R	R	A	R	A	A	A	R	A	A
ChrIV	23.5	R	A	A	R	A	R	R	A	R	R	R	NA	A	A	A	A	R	A	A	A	A	R	R	A	NA	A	R	A	R	R	A	R	R	A	A	R	R	A	R	R	A	R	A	A	A	R	A	A
ChrIV	23.6	R	A	A	R	A	R	R	A	R	R	R	A	A	A	A	A	R	A	A	A	A	R	NA	A	R	A	R	A	R	R	A	R	R	A	A	R	R	A	R	R	A	R	A	A	A	R	A	A
ChrIV	23.7	R	A	A	R	A	R	R	A	R	R	R	A	A	A	A	A	R	A	A	NA	A	R	R	A	R	A	R	A	R	R	A	NA	R	A	A	R	R	A	R	R	A	R	A	A	A	R	A	A
ChrIV	23.8	R	A	A	R	A	R	R	A	R	R	R	A	A	A	A	A	R	A	A	A	A	R	R	A	R	A	R	A	R	R	A	R	R	A	A	R	R	A	R	R	A	R	A	A	A	R	A	A
ChrIV	23.9	R	A	A	R	A	R	R	A	R	R	R	A	A	A	A	A	R	A	A	A	A	R	R	A	R	A	R	A	R	R	A	R	R	A	A	R	R	A	R	R	A	R	A	A	A	R	A	A
ChrIV	24	R	A	A	R	A	R	R	A	R	R	R	A	A	A	A	A	R	A	A	A	A	R	NA	A	R	A	R	A	R	R	A	R	NA	A	A	R	R	A	R	R	A	R	A	A	A	R	A	A
ChrIV	24.1	R	A	A	R	A	R	R	A	R	R	R	A	A	A	A	A	R	A	A	A	A	R	R	A	R	A	R	A	R	R	A	R	R	A	A	R	R	A	R	R	A	R	A	A	A	R	A	A
ChrIV	24.2	R	A	A	R	A	R	R	A	R	R	R	A	A	A	A	A	R	A	A	A	A	R	R	A	R	A	NA	A	R	R	A	R	R	A	A	R	R	A	R	R	A	R	A	A	A	R	A	A
ChrIV	24.3	R	A	A	R	A	R	R	NA	R	R	R	A	A	A	A	A	R	A	A	A	A	R	R	NA	R	A	R	NA	R	R	A	R	R	A	A	R	R	A	R	R	A	R	A	NA	NA	R	A	A
ChrIV	24.4	R	A	A	R	A	R	R	A	R	R	R	A	A	A	A	A	R	A	A	A	A	R	R	A	R	A	R	A	R	R	A	R	R	A	A	R	R	A	R	R	A	R	A	A	A	R	A	A
ChrIV	24.5	R	A	A	NA	A	R	R	A	R	R	R	A	A	A	A	A	R	A	A	A	A	R	R	A	R	A	R	A	R	R	A	R	NA	A	A	R	R	A	R	R	A	R	A	A	A	NA	A	A
ChrIV	24.6	R	NA	A	R	A	R	R	A	R	R	R	A	A	A	A	A	R	A	A	A	A	R	R	A	R	A	NA	A	R	R	A	R	R	A	A	R	R	A	R	R	A	R	A	A	A	R	A	A
ChrIV	24.7	R	R	A	R	A	R	R	A	R	R	R	A	A	A	A	A	R	A	A	A	A	R	R	A	R	A	R	A	R	R	A	R	R	A	A	R	R	A	R	R	A	R	A	A	A	R	A	A
ChrIV	24.8	R	R	A	R	A	R	R	A	R	R	R	A	A	A	A	A	NA	A	A	A	A	R	R	A	R	A	R	A	R	R	A	R	R	A	A	R	R	A	R	R	A	R	A	A	A	R	A	A
ChrIV	24.9	R	R	A	R	A	R	R	A	R	R	R	A	A	A	A	NA	R	A	A	A	A	R	R	A	R	A	R	A	R	R	A	R	R	A	A	R	R	A	R	R	A	R	A	A	A	R	A	A
ChrIV	25	R	R	A	R	A	R	R	A	R	R	R	A	A	A	A	R	R	A	A	A	A	R	R	A	R	A	R	A	R	R	A	R	R	A	A	R	R	A	R	R	A	R	A	A	A	R	A	A
ChrIV	25.1	R	R	A	R	A	R	R	A	R	R	R	A	A	A	A	R	R	A	A	A	A	R	R	A	R	A	R	A	R	R	A	R	R	A	A	R	R	A	R	R	A	R	A	A	A	R	A	A
ChrIV	25.2	R	R	A	R	A	R	R	A	R	R	R	A	A	A	A	R	R	A	A	A	A	R	R	A	R	A	R	A	R	R	A	R	R	A	A	R	R	A	R	R	A	R	A	A	A	R	A	A
ChrIV	25.3	R	R	A	R	A	R	R	A	R	R	R	NA	A	A	NA	R	R	A	A	A	A	R	R	A	R	A	R	A	R	R	A	R	R	A	A	R	R	A	R	R	A	R	A	A	A	R	A	A
ChrIV	25.4	R	R	A	R	A	R	R	A	R	R	R	NA	A	A	A	R	R	A	A	A	NA	R	R	A	R	A	R	NA	R	R	A	R	R	A	A	R	R	A	R	R	A	R	A	A	A	R	A	A
ChrIV	25.5	R	R	A	R	A	R	R	A	R	R	R	NA	A	A	A	R	R	A	A	A	NA	R	R	A	R	NA	R	A	R	R	A	R	R	NA	A	R	R	A	R	R	A	R	NA	A	A	R	A	A
ChrIV	25.7	R	R	A	NA	A	R	NA	NA	R	R	R	NA	A	A	A	R	R	NA	A	A	A	R	NA	A	R	A	R	NA	R	R	A	R	R	A	A	R	NA	A	R	R	A	R	A	A	A	NA	A	NA
ChrIV	25.8	R	R	A	R	A	R	R	A	R	R	R	A	A	A	A	R	R	A	A	A	A	R	R	A	R	A	R	NA	R	R	A	R	R	A	A	R	R	A	R	R	A	R	A	A	A	R	A	R
ChrIV	26	R	R	A	NA	A	R	R	A	R	R	R	A	A	A	A	R	R	A	A	A	NA	R	R	A	R	R	R	A	R	R	A	R	R	A	A	R	R	A	R	R	A	R	A	A	A	R	A	R
ChrIV	26.1	R	R	A	R	A	R	R	A	R	R	R	A	A	A	A	R	R	A	A	A	NA	R	NA	A	R	R	R	A	R	R	A	R	R	A	A	R	R	A	R	R	A	R	A	A	A	R	A	R
ChrIV	26.2	R	R	A	R	A	R	R	A	R	R	R	A	A	A	A	R	R	A	A	A	A	R	R	A	R	R	R	A	R	R	A	R	R	A	A	R	R	A	R	R	A	R	A	A	A	R	A	R
ChrIV	26.3	R	R	A	R	A	R	R	A	R	R	R	A	A	NA	A	R	R	A	A	A	A	R	R	A	R	R	R	A	R	R	A	R	R	A	A	R	R	A	R	R	A	R	A	A	A	R	A	R
ChrIV	26.4	R	R	A	R	A	R	R	A	R	R	R	A	A	A	A	R	R	A	A	A	A	R	R	A	R	R	R	A	R	R	A	R	R	A	A	NA	R	A	R	R	A	R	A	A	A	R	A	R
ChrIV	26.5	R	R	A	R	A	R	R	A	R	R	R	A	A	A	A	R	R	A	A	A	A	R	R	A	R	R	R	A	R	R	A	R	R	A	A	A	R	A	R	R	A	R	A	A	A	R	A	R
ChrIV	26.6	R	R	A	R	A	R	R	A	R	R	R	A	A	A	A	R	R	A	A	A	A	R	R	A	R	R	R	A	R	R	A	R	R	A	A	A	R	A	R	R	A	R	A	A	A	R	A	R
ChrIV	26.7	R	R	A	R	A	R	R	A	R	R	R	A	A	A	A	R	R	A	A	A	A	R	R	A	R	R	R	A	R	R	A	R	R	A	A	A	R	A	R	R	A	R	A	A	A	R	A	R
ChrIV	26.8	R	R	A	R	A	R	R	A	R	R	R	A	A	A	A	R	R	A	A	A	A	R	R	A	R	R	R	A	R	R	A	R	R	A	A	A	R	A	R	R	A	R	A	A	A	R	A	R
ChrIV	26.9	R	R	A	R	A	R	R	A	R	R	R	A	A	A	A	R	R	A	A	A	A	R	R	A	R	R	R	A	R	R	A	R	R	A	A	A	R	A	R	R	A	R	A	A	A	R	A	R
ChrIV	27	R	R	A	R	A	R	R	A	R	R	R	NA	A	A	A	R	R	A	A	A	A	R	R	A	R	R	R	A	R	R	A	R	R	A	A	A	R	A	R	R	A	R	A	A	A	R	A	NA
ChrIV	27.1	R	R	A	R	A	R	R	A	R	R	R	A	A	A	A	R	R	A	A	A	A	R	R	A	R	R	R	A	R	R	A	R	R	A	A	NA	R	A	R	R	A	R	A	A	A	R	A	R
ChrIV	27.2	R	R	A	R	A	NA	R	A	R	R	NA	A	A	A	NA	R	R	A	A	A	A	R	R	A	R	R	NA	A	R	R	A	R	R	A	A	A	R	A	R	NA	A	R	A	A	A	NA	A	R
ChrIV	27.3	R	R	A	NA	A	R	R	A	R	R	R	A	A	A	A	R	R	A	A	A	A	R	R	A	R	R	R	A	R	R	A	R	NA	NA	A	A	NA	A	R	R	A	NA	A	A	A	NA	A	R
ChrIV	27.4	R	R	A	NA	A	R	R	A	A	R	NA	A	A	A	A	R	R	A	NA	A	A	R	R	A	R	R	R	A	R	R	A	R	R	A	A	A	NA	A	R	R	A	NA	A	A	A	R	A	R
ChrIV	27.5	R	R	A	R	A	R	NA	A	A	R	R	A	A	A	A	R	R	A	A	A	A	R	R	A	R	R	R	A	R	R	A	R	R	A	A	A	R	A	R	R	A	R	A	A	A	R	A	R
ChrIV	27.6	R	R	A	R	A	R	R	A	A	R	R	A	A	NA	A	R	R	A	A	A	A	R	R	A	R	R	R	A	R	R	A	R	R	NA	A	A	R	A	R	R	A	R	A	A	A	R	A	R
ChrIV	27.7	R	R	A	R	A	R	NA	A	A	R	R	A	A	A	A	R	R	A	A	A	A	R	R	A	R	R	R	A	R	R	A	R	R	A	A	A	R	A	R	R	A	R	A	A	A	R	A	R
ChrIV	27.8	R	R	A	R	A	R	R	A	A	R	R	A	A	A	A	R	R	A	A	A	A	R	R	A	R	R	R	A	R	R	A	R	R	A	A	A	R	A	R	R	A	R	A	A	A	R	A	R
ChrIV	27.9	R	R	A	R	A	R	R	A	A	R	R	A	A	A	A	R	R	A	A	A	A	R	R	A	R	R	R	A	R	R	A	R	R	A	A	A	R	A	R	R	A	R	A	A	A	R	A	R
ChrIV	28	R	R	A	R	A	R	R	A	A	R	R	A	A	A	A	R	R	A	A	A	A	R	R	A	R	R	R	A	R	R	A	R	R	A	A	A	R	A	R	R	A	R	A	A	A	R	A	R
ChrIV	28.1	R	R	A	R	A	R	R	A	A	R	R	NA	A	A	A	R	R	A	A	A	A	R	R	A	R	R	R	A	R	R	A	R	R	A	A	A	R	A	R	R	A	R	A	A	A	R	A	R
ChrIV	28.2	R	R	A	R	A	R	R	A	A	R	R	A	A	A	A	R	R	A	NA	A	A	R	R	A	R	R	R	A	R	R	A	R	R	A	A	A	R	A	R	R	A	R	A	A	A	NA	A	R
ChrIV	28.3	R	R	A	R	A	R	R	A	A	R	R	A	A	A	A	R	R	A	A	A	A	R	R	A	R	R	R	A	R	R	A	R	R	A	A	A	R	A	R	R	A	R	A	A	A	R	A	R
ChrIV	28.4	R	R	A	R	A	R	R	A	A	R	R	A	A	A	A	R	R	A	A	A	A	R	R	A	R	R	R	A	R	R	A	R	R	A	A	A	R	A	R	R	A	R	A	A	A	R	A	R
ChrIV	28.5	R	R	A	R	A	R	R	A	A	R	R	A	A	A	A	R	R	A	A	A	A	R	R	A	R	R	R	A	R	R	A	R	NA	A	A	A	R	A	R	NA	A	R	A	A	A	R	A	R
ChrIV	28.6	R	R	A	R	A	R	R	A	A	R	R	A	A	A	A	R	R	A	A	A	A	R	R	A	R	R	R	A	R	R	A	R	R	A	A	A	R	A	R	R	A	R	A	A	A	R	A	R
ChrIV	28.7	R	R	A	R	A	R	R	A	A	R	R	A	A	A	A	R	R	A	A	A	A	R	R	A	R	R	R	A	R	R	A	R	R	A	A	A	R	A	R	R	A	R	A	A	A	R	A	R
ChrIV	28.8	R	R	A	R	A	R	R	A	A	R	R	A	A	A	A	R	R	A	A	A	A	R	R	A	R	R	R	A	R	R	A	R	R	A	A	A	R	A	R	R	A	R	A	A	A	R	A	R
ChrIV	28.9	R	R	A	R	A	R	R	A	A	R	R	A	A	A	A	R	R	A	A	A	A	R	R	A	R	R	R	A	R	R	A	R	R	A	A	A	R	A	R	R	A	R	A	A	A	R	A	R
ChrIV	29	R	R	A	R	A	R	R	A	A	R	R	A	A	A	A	R	R	A	A	A	A	R	R	A	R	R	R	A	R	R	A	R	R	A	A	A	R	A	R	R	A	R	A	A	A	R	A	R
ChrIV	29.1	R	R	A	NA	A	R	R	A	A	R	R	A	A	A	A	R	R	A	A	NA	A	R	NA	A	R	R	R	A	R	R	A	R	R	A	A	A	R	A	R	R	A	R	A	A	A	R	A	R
ChrIV	29.2	R	R	A	NA	A	R	R	A	A	R	R	A	A	A	A	R	R	A	A	A	A	R	R	A	R	R	R	A	R	R	A	R	R	A	A	A	R	A	R	R	A	R	A	A	A	R	A	R
ChrIV	29.3	R	R	A	R	A	R	R	A	A	R	R	A	A	A	A	R	R	A	A	A	A	R	R	A	R	R	R	A	R	R	A	R	R	A	A	A	R	A	R	R	A	R	A	A	A	R	A	R
ChrIV	29.5	R	R	A	R	A	R	R	A	A	R	R	A	A	A	A	R	R	A	A	A	A	R	NA	A	R	R	R	A	R	R	A	R	R	A	A	A	R	A	R	R	A	R	A	A	A	R	A	R
ChrIV	29.6	R	R	A	R	A	R	NA	A	A	R	R	A	A	A	A	R	R	A	A	A	A	R	R	A	R	R	R	A	R	R	A	R	R	A	A	A	R	A	R	R	A	R	A	A	A	R	A	R
ChrIV	29.7	R	R	A	R	A	R	R	A	A	R	R	A	A	A	A	R	R	A	A	A	A	R	R	A	R	R	R	A	R	R	A	R	NA	A	A	A	R	A	R	R	A	R	A	A	A	R	A	R
ChrIV	29.8	R	R	A	R	A	R	R	A	A	R	R	A	A	A	A	R	R	A	A	A	A	R	NA	A	R	R	R	A	R	R	A	R	R	A	A	A	R	A	R	R	A	R	A	A	A	R	A	R
ChrIV	29.9	R	R	A	R	A	R	R	A	A	R	R	A	A	A	A	R	R	A	A	A	A	R	R	A	R	R	R	A	R	R	A	R	R	A	A	A	R	A	R	R	A	R	A	A	A	R	A	R
ChrIV	30	R	R	A	R	A	R	R	A	A	R	R	A	A	A	A	R	R	A	A	A	A	R	R	A	R	R	R	A	R	R	A	R	R	A	A	A	R	A	R	R	A	R	A	A	A	R	A	R
ChrIV	30.1	R	R	A	R	A	R	R	A	A	R	R	A	A	A	A	R	R	A	A	A	A	R	R	A	R	R	R	A	R	R	A	R	R	A	A	A	R	A	R	R	A	R	A	A	A	R	A	R
ChrIV	30.2	R	R	A	R	A	R	NA	A	A	R	R	A	A	A	A	R	R	A	A	A	A	R	NA	A	R	R	R	A	R	R	A	R	R	A	A	A	R	A	R	R	A	R	A	A	A	R	A	R
ChrIV	30.3	R	R	A	R	A	R	R	A	A	R	R	A	A	A	A	R	R	A	A	A	A	R	R	A	R	R	R	A	R	R	A	R	R	A	A	A	R	A	R	R	A	R	A	A	A	R	A	R
ChrIV	30.4	R	R	A	R	A	R	NA	A	A	R	R	A	A	A	A	R	R	A	A	NA	A	R	R	A	R	R	R	A	R	R	A	R	R	NA	A	A	R	A	R	R	A	R	A	A	A	R	A	R
ChrV	0	R	R	A	A	A	A	A	A	A	R	A	A	A	R	R	R	R	R	R	A	R	R	A	R	R	A	A	R	A	R	A	R	R	R	A	A	R	R	R	A	R	A	R	R	A	R	A	R
ChrV	0.1	R	R	A	A	A	A	A	A	A	R	A	A	A	R	NA	R	R	R	R	A	R	R	A	R	R	A	A	R	A	R	A	R	R	R	A	A	R	R	R	A	R	A	R	R	A	R	A	R
ChrV	0.2	R	R	A	A	A	A	A	A	A	R	A	A	A	R	NA	R	R	R	NA	A	R	R	A	R	R	A	A	R	A	R	A	R	R	R	A	A	R	R	R	A	R	A	R	R	A	R	A	R
ChrV	0.3	R	R	A	A	A	A	A	A	A	R	A	A	A	R	R	R	R	R	R	A	R	R	A	R	R	A	A	R	A	R	A	R	R	R	A	A	R	R	R	A	R	A	R	R	A	R	A	R
ChrV	0.4	R	R	A	A	A	A	A	A	A	R	A	A	A	NA	R	R	R	R	R	A	R	R	A	R	R	A	A	R	A	R	A	R	R	R	A	A	R	R	R	A	R	A	R	R	A	R	A	R
ChrV	0.5	R	R	A	A	A	A	A	A	A	R	A	A	A	R	R	R	R	R	R	A	R	R	A	R	R	A	A	R	A	R	A	R	R	R	A	A	R	R	R	A	R	A	R	R	A	R	A	R
ChrV	0.7	R	R	A	A	A	A	A	A	A	R	A	A	A	R	R	A	R	R	R	A	R	R	A	R	R	A	A	R	A	R	A	R	R	R	A	A	R	R	R	A	R	A	R	R	A	R	A	R
ChrV	0.8	R	R	A	A	A	A	A	A	A	R	A	A	A	R	R	A	R	R	R	A	R	R	A	R	R	A	A	R	A	R	A	R	R	R	A	A	R	R	R	A	R	A	R	R	A	R	A	R
ChrV	1	R	R	NA	NA	NA	NA	A	NA	NA	R	NA	NA	A	NA	R	NA	R	R	R	A	R	R	NA	R	R	A	A	R	A	R	NA	NA	R	R	A	A	R	R	R	A	R	A	R	R	NA	R	NA	R
ChrV	1.1	R	R	A	A	NA	A	A	A	A	R	A	NA	A	NA	R	A	R	R	R	NA	R	R	A	R	R	A	NA	R	A	R	A	R	R	R	A	A	R	R	R	NA	R	A	R	R	NA	R	A	R
ChrV	1.2	R	R	A	A	A	A	A	A	A	R	A	A	A	A	R	A	R	R	R	NA	R	R	A	R	R	A	A	R	A	R	A	R	R	R	A	NA	R	R	R	A	R	A	R	R	A	R	A	R
ChrV	1.3	R	R	A	NA	A	NA	A	NA	A	R	A	NA	A	A	R	A	R	R	R	A	R	R	A	R	R	A	A	R	A	R	A	R	R	R	A	R	R	R	R	A	R	NA	R	R	NA	R	NA	R
ChrV	1.4	R	R	A	A	A	A	A	A	A	R	A	NA	A	A	R	A	R	R	R	A	R	R	A	R	R	A	A	R	A	R	A	R	R	R	A	R	R	R	R	A	R	A	R	R	A	R	A	R
ChrV	1.5	R	R	A	A	A	A	A	A	A	R	A	A	A	A	NA	A	R	R	R	A	R	R	NA	R	R	A	A	R	A	R	A	R	R	R	A	R	R	R	R	NA	R	A	NA	R	A	R	A	R
ChrV	1.6	R	R	A	NA	A	A	A	A	A	R	A	A	A	A	R	A	R	R	R	A	R	R	R	R	R	A	NA	R	A	R	A	R	R	R	A	R	R	R	R	A	R	A	A	R	A	R	A	R
ChrV	1.7	R	NA	A	A	A	NA	A	A	NA	NA	A	NA	A	A	R	A	R	NA	R	A	R	R	R	R	R	NA	A	R	A	R	A	NA	R	R	A	R	R	R	R	A	R	A	NA	R	NA	R	NA	R
ChrV	1.8	R	R	A	A	A	A	A	A	A	R	A	A	A	A	R	A	R	R	R	A	R	R	R	R	R	A	A	R	A	R	A	R	NA	R	A	R	R	R	R	A	R	A	A	R	A	R	A	R
ChrV	2	R	R	A	A	A	A	A	A	A	R	A	A	A	A	R	A	R	R	R	A	R	R	R	R	R	A	A	R	NA	R	A	R	R	R	A	R	R	R	R	A	R	A	A	R	A	R	A	R
ChrV	2.1	R	R	A	A	A	A	A	A	A	R	A	A	A	A	R	A	R	R	R	A	NA	R	R	R	R	A	A	R	A	R	A	R	R	R	A	R	R	R	R	A	R	A	A	R	A	R	A	R
ChrV	2.2	R	R	A	A	A	NA	A	NA	A	R	A	A	A	A	R	A	R	R	R	A	R	R	R	R	R	NA	A	R	A	R	A	R	R	R	A	R	R	R	R	A	R	A	A	R	A	R	A	R
ChrV	2.3	R	R	A	A	A	A	A	A	A	R	A	A	A	A	R	A	R	R	R	A	R	R	R	R	R	A	A	R	A	R	A	R	R	R	A	R	R	R	R	A	R	A	A	R	NA	R	A	R
ChrV	2.4	R	R	A	A	A	A	A	A	A	R	A	A	A	A	R	A	R	R	R	A	NA	R	R	R	R	A	A	NA	A	R	A	R	R	R	A	R	R	R	R	A	R	A	A	R	A	NA	A	R
ChrV	2.6	R	R	A	A	A	A	A	A	A	R	A	A	A	A	R	A	R	R	R	A	R	R	R	R	R	A	A	R	A	R	A	R	R	R	A	R	R	R	R	A	R	A	A	R	A	R	A	R
ChrV	2.7	R	R	A	A	A	NA	A	A	A	R	A	A	A	A	R	A	R	R	R	A	R	R	R	R	R	A	A	R	A	R	A	R	R	R	A	R	R	R	R	R	R	A	NA	R	A	R	A	R
ChrV	2.8	R	R	A	A	A	R	A	A	A	R	A	A	A	A	R	A	R	R	R	A	R	R	NA	R	R	A	A	NA	A	R	A	R	R	R	A	R	R	R	R	R	R	A	A	R	A	R	A	R
ChrV	2.9	R	R	A	A	A	R	A	A	A	R	A	A	A	A	R	A	R	R	R	A	R	R	R	R	R	A	A	R	A	R	A	R	R	R	A	R	R	R	R	R	R	A	NA	R	NA	R	A	R
ChrV	3	R	R	A	NA	A	R	A	NA	A	R	A	A	A	NA	R	NA	R	R	R	NA	R	R	R	R	R	A	A	R	NA	R	A	R	R	NA	A	R	R	R	R	R	R	NA	NA	R	A	R	NA	R
ChrV	3.1	R	R	A	NA	A	R	A	NA	A	R	A	A	A	A	R	A	R	R	R	NA	R	R	R	R	R	A	A	R	A	R	A	R	NA	NA	NA	R	R	R	R	R	R	NA	NA	NA	NA	R	NA	R
ChrV	3.2	R	R	A	A	A	R	A	A	A	R	A	A	A	A	R	A	R	R	R	A	R	R	R	R	R	A	A	R	A	R	A	R	R	R	A	R	R	R	R	R	R	A	A	R	A	R	A	R
ChrV	3.3	R	R	A	A	A	R	A	NA	A	R	A	A	A	A	R	A	R	R	R	A	R	R	R	R	R	A	A	R	A	R	A	R	R	R	A	R	R	R	R	R	R	A	A	R	NA	R	A	R
ChrV	3.6	R	R	NA	A	A	R	NA	A	NA	R	A	NA	NA	NA	R	A	R	R	R	A	R	R	R	R	R	A	A	R	NA	R	A	R	R	R	A	R	R	R	R	R	R	NA	A	R	NA	R	NA	R
ChrV	3.7	NA	R	A	A	A	R	NA	A	A	R	A	A	A	NA	NA	A	R	R	R	A	R	R	R	R	R	A	A	R	A	R	A	R	R	R	A	R	R	R	R	R	R	NA	NA	R	NA	R	A	R
ChrV	3.8	R	R	A	A	A	R	A	A	A	R	A	A	A	A	R	A	R	R	R	A	R	R	R	R	R	A	A	R	NA	R	A	R	R	R	A	R	R	NA	R	R	R	A	A	R	A	R	A	R
ChrV	3.9	R	R	A	A	A	R	A	A	A	R	A	A	A	A	R	A	R	R	R	NA	R	R	R	R	R	A	A	R	A	R	A	R	R	R	R	R	R	R	R	R	R	A	A	R	A	R	A	R
ChrV	4	R	R	A	A	A	R	A	NA	A	R	A	A	A	A	R	A	R	R	R	A	R	R	R	R	R	NA	A	R	A	R	A	R	R	R	R	R	R	R	R	R	R	A	A	R	A	R	A	R
ChrV	4.1	R	R	A	A	A	R	A	A	A	R	A	A	A	A	R	A	R	R	R	A	R	R	R	R	NA	A	A	R	A	R	A	R	R	R	R	R	R	R	R	R	R	A	A	R	NA	R	A	R
ChrV	4.2	R	R	NA	A	A	R	A	NA	A	R	NA	A	A	A	R	A	R	R	R	NA	R	R	R	R	R	NA	A	R	A	R	A	R	R	R	R	R	R	R	R	R	R	A	A	R	A	R	A	R
ChrV	4.3	R	R	A	A	A	R	NA	A	A	R	A	A	A	A	R	A	R	R	R	A	R	R	R	R	R	A	A	R	A	R	A	R	R	NA	R	R	R	R	R	R	R	NA	A	R	A	R	A	R
ChrV	4.4	R	R	R	NA	A	R	A	A	A	A	R	A	A	A	R	A	R	R	R	NA	R	R	R	R	R	A	A	R	A	R	A	R	R	R	R	R	R	R	R	R	R	A	A	R	A	R	A	R
ChrV	4.5	R	R	R	A	A	R	A	A	A	A	R	A	A	A	R	A	R	R	R	NA	R	R	R	R	R	A	A	R	A	R	A	R	NA	R	R	R	R	R	R	R	R	A	A	R	A	R	A	R
ChrV	4.6	R	NA	R	A	A	R	A	A	A	A	R	NA	A	NA	R	NA	R	R	R	A	R	NA	R	R	R	A	NA	R	A	R	A	R	R	R	R	R	R	R	R	R	R	A	A	R	A	R	A	R
ChrV	4.8	R	R	R	NA	A	R	A	NA	A	NA	R	A	A	A	NA	A	R	R	R	A	R	R	R	R	R	A	A	R	NA	R	A	R	R	R	R	R	R	R	R	R	R	A	A	R	A	R	A	R
ChrV	4.9	NA	A	R	NA	A	R	A	NA	A	A	R	A	A	A	NA	A	R	R	R	A	R	A	R	R	R	A	A	R	A	R	A	R	R	NA	R	R	R	R	NA	R	R	A	A	R	A	NA	NA	R
ChrV	5	A	A	R	A	A	R	A	A	A	A	R	A	A	A	A	A	R	R	R	A	NA	A	R	R	R	A	NA	R	A	R	A	NA	R	R	R	NA	R	NA	R	R	R	A	A	R	A	NA	A	NA
ChrV	5.2	A	A	R	A	A	R	A	A	A	A	R	NA	NA	A	A	A	R	R	R	A	NA	A	NA	R	R	A	A	R	A	R	NA	R	R	R	NA	R	R	NA	NA	R	R	A	A	R	A	NA	A	R
ChrV	5.3	A	A	R	A	A	R	A	NA	A	A	R	A	A	A	A	A	R	R	R	A	R	A	R	R	R	A	A	R	A	R	A	R	R	R	R	R	R	A	R	R	R	A	A	R	A	R	A	R
ChrV	5.4	A	A	R	NA	A	R	NA	A	A	A	R	NA	NA	A	A	NA	R	R	R	NA	R	NA	R	R	R	A	A	R	NA	R	A	R	NA	R	R	R	R	A	R	R	R	A	NA	R	A	R	NA	R
ChrV	5.5	A	A	R	A	A	R	NA	A	A	A	R	A	A	NA	A	A	R	R	R	A	R	A	R	R	R	A	A	R	A	R	A	R	R	R	R	R	R	A	R	R	R	A	A	R	A	R	A	R
ChrV	5.6	A	A	R	A	A	R	A	A	A	A	R	A	A	A	NA	A	R	R	R	A	R	A	R	R	R	A	A	R	A	R	A	R	R	R	R	R	R	A	R	R	R	A	A	R	A	R	A	R
ChrV	5.7	A	A	R	NA	A	R	A	A	A	A	R	A	A	A	NA	A	R	R	R	NA	R	A	R	R	R	A	A	R	A	R	A	R	R	R	R	R	R	A	R	R	R	A	A	R	A	R	A	R
ChrV	5.8	A	A	R	A	A	R	A	A	A	A	R	A	A	A	NA	A	R	R	R	A	R	A	R	R	R	A	A	R	A	R	A	R	R	R	R	R	R	A	R	R	R	A	A	R	A	R	A	R
ChrV	5.9	A	A	R	A	A	R	A	A	A	A	R	A	A	A	NA	A	R	R	R	A	R	A	R	R	R	A	A	R	A	R	A	R	R	R	R	R	R	A	R	R	R	A	A	R	A	R	A	R
ChrV	6	A	A	R	A	A	R	A	A	A	A	R	A	A	A	A	A	R	R	R	A	R	A	R	R	R	A	A	R	A	R	A	R	R	R	R	R	R	A	R	R	R	A	A	R	A	R	A	R
ChrV	6.1	A	A	R	A	A	R	A	A	A	A	R	A	A	A	A	A	R	R	R	A	R	A	R	R	R	A	A	R	A	R	A	R	R	R	R	R	R	A	R	R	R	A	A	R	A	R	A	R
ChrV	6.2	A	A	R	A	A	R	A	A	A	A	R	A	A	A	A	A	R	R	R	A	R	A	R	R	R	A	A	R	A	R	A	R	R	R	R	R	R	A	R	R	R	A	A	R	A	R	A	R
ChrV	6.3	A	A	R	A	A	R	A	A	A	A	R	A	A	A	A	A	R	R	R	A	R	A	R	R	R	A	A	R	A	R	A	R	R	R	R	R	R	A	R	R	R	A	A	R	A	R	A	R
ChrV	6.4	A	A	R	A	A	R	A	A	A	A	R	A	A	A	NA	A	R	R	R	A	R	A	R	R	R	A	A	R	A	R	A	R	R	R	R	R	R	A	R	R	R	A	A	R	A	R	A	R
ChrV	6.5	A	A	R	A	A	R	A	A	A	A	R	A	A	A	A	A	R	R	R	A	R	A	NA	R	R	A	A	R	A	R	A	R	R	R	R	R	R	A	R	R	R	A	A	R	A	R	A	R
ChrV	6.6	A	A	R	A	A	R	A	A	A	A	R	A	A	A	NA	A	R	R	R	A	R	A	R	R	R	A	A	R	A	R	A	R	R	R	R	R	R	A	R	R	R	A	A	R	A	R	A	R
ChrV	6.7	A	A	R	A	A	R	A	A	A	A	R	A	A	A	A	A	R	R	R	A	R	A	R	R	R	A	A	R	A	R	A	R	R	R	R	R	R	A	R	R	R	A	A	R	A	R	A	R
ChrV	6.8	A	A	R	A	A	R	A	A	A	A	R	A	A	A	A	A	R	R	R	A	R	A	R	R	R	A	A	R	A	R	A	R	R	R	R	R	R	A	R	R	R	A	A	R	A	R	A	R
ChrV	6.9	A	A	R	A	A	R	A	A	A	A	R	A	A	A	A	A	R	R	R	A	NA	A	R	R	R	A	A	R	A	R	A	R	R	R	R	R	R	A	R	R	R	A	A	R	A	NA	A	R
ChrV	7	A	A	R	A	A	R	A	A	A	A	R	A	A	A	NA	A	R	R	R	A	R	A	R	R	R	A	A	R	A	R	A	R	R	R	R	R	R	A	R	R	R	A	A	R	A	R	A	R
ChrV	7.1	A	A	R	A	A	R	A	A	A	A	R	A	A	A	A	A	R	R	R	A	R	A	R	R	R	A	NA	R	A	R	A	R	R	R	R	R	R	A	R	R	R	A	A	R	A	R	A	R
ChrV	7.2	A	A	R	A	A	R	A	A	A	A	R	A	A	A	A	A	R	R	R	A	R	A	R	R	R	A	A	R	A	R	A	R	R	R	R	R	R	A	R	R	R	A	A	R	A	R	A	R
ChrV	7.3	A	A	R	A	A	R	A	NA	A	A	R	A	A	NA	NA	A	R	R	R	NA	R	A	R	R	R	NA	A	R	A	R	A	R	R	R	R	R	R	A	R	R	R	A	A	R	A	R	A	R
ChrV	7.5	A	A	R	A	A	R	A	A	A	A	R	A	A	A	A	A	R	R	R	A	NA	A	R	R	R	A	A	R	A	R	A	R	R	R	R	R	R	A	R	R	R	A	A	R	A	R	A	R
ChrV	7.6	A	A	R	A	A	R	A	A	A	A	R	A	A	A	NA	A	R	R	R	A	R	A	R	R	R	A	A	R	A	R	A	R	R	R	R	R	R	A	R	R	R	A	A	R	A	R	A	R
ChrV	7.8	A	A	R	A	A	R	A	A	A	NA	R	A	A	A	A	A	R	NA	R	A	R	A	NA	R	R	A	NA	R	A	R	A	R	R	R	R	R	R	A	R	R	R	A	A	R	A	R	A	NA
ChrV	7.9	A	A	R	A	A	R	A	NA	A	A	R	A	A	A	A	A	R	R	R	A	R	A	R	R	R	A	A	R	A	R	A	R	R	R	R	R	R	A	R	R	R	A	A	R	A	R	A	R
ChrV	8	A	A	R	A	A	R	A	A	A	A	R	A	A	A	A	A	R	R	R	A	R	A	R	R	R	NA	A	R	A	R	A	R	R	R	R	R	R	A	R	R	R	A	A	R	A	R	A	R
ChrV	8.1	A	A	R	A	A	R	A	A	A	A	R	A	A	A	A	A	R	R	R	A	R	A	R	R	R	A	NA	R	A	R	A	R	R	R	R	R	R	A	R	R	R	A	A	R	A	R	A	R
ChrV	8.2	A	A	R	NA	A	R	A	NA	A	A	R	A	A	A	NA	A	R	R	R	NA	R	A	R	R	R	A	A	R	A	R	A	R	R	R	R	R	R	A	R	R	R	A	A	R	A	R	A	R
ChrV	8.3	A	A	R	A	A	R	A	A	A	A	R	A	A	A	A	A	R	R	R	A	R	A	R	R	R	NA	A	R	A	R	A	R	R	R	R	R	R	A	R	R	R	A	A	R	A	R	A	R
ChrV	8.4	NA	A	R	A	A	R	A	A	A	A	R	A	A	A	A	A	R	R	R	NA	R	A	R	R	R	A	NA	R	A	R	A	R	R	R	R	R	R	A	R	R	R	A	NA	R	A	R	A	R
ChrV	8.8	A	A	R	A	A	R	A	A	A	A	R	A	A	A	A	A	R	R	R	A	NA	A	R	R	R	A	A	R	A	R	A	R	R	R	R	R	R	A	R	R	R	A	A	R	A	NA	A	NA
ChrV	9	A	A	R	A	A	R	A	A	A	A	R	A	A	A	NA	A	R	R	R	A	R	A	R	R	R	A	A	R	A	R	A	R	R	R	R	R	R	A	R	R	R	A	A	R	A	R	A	R
ChrV	9.1	A	A	R	A	A	R	A	A	A	A	R	A	A	A	A	A	R	R	R	A	R	A	R	R	R	A	A	R	A	R	A	R	R	R	R	R	R	A	R	R	R	A	A	R	A	R	A	R
ChrV	9.2	A	A	R	A	A	R	A	A	A	A	R	A	A	A	A	A	R	R	R	A	R	A	R	R	R	A	A	R	A	R	A	R	R	R	R	R	R	A	R	R	R	A	A	R	A	R	A	R
ChrV	9.3	A	A	R	A	A	R	A	A	A	A	R	A	A	A	NA	A	R	R	R	A	R	A	R	R	R	A	A	R	A	R	A	R	R	R	R	R	R	A	R	R	R	A	A	R	A	R	A	R
ChrV	9.4	NA	A	R	NA	A	R	A	A	A	A	R	A	A	A	A	A	R	R	R	A	NA	A	R	R	NA	NA	A	R	NA	R	A	R	R	R	R	R	R	A	NA	R	NA	A	A	R	A	R	A	R
ChrV	9.6	A	A	R	A	A	R	A	A	A	A	R	A	A	A	NA	A	R	NA	R	A	R	A	NA	R	R	A	A	R	A	R	A	R	R	R	R	R	R	A	R	R	R	A	A	R	A	R	A	NA
ChrV	9.7	A	A	R	A	A	R	A	NA	A	A	R	A	A	A	A	A	R	R	R	A	R	A	R	R	R	A	A	R	A	R	A	R	R	R	R	R	R	A	R	R	R	A	A	R	A	R	A	R
ChrV	9.8	A	A	R	A	A	R	A	A	A	A	R	A	A	A	NA	A	R	R	R	A	NA	A	R	R	R	A	A	R	A	R	A	R	R	R	R	R	R	A	R	R	R	A	A	R	A	R	A	R
ChrV	9.9	A	A	R	A	A	R	A	A	A	A	R	A	A	A	A	A	R	R	R	A	R	A	R	R	R	A	A	R	A	R	A	R	R	R	R	R	R	A	R	R	R	A	A	R	A	R	A	R
ChrV	10.4	A	A	R	NA	A	R	A	A	A	A	R	A	A	A	NA	A	R	R	R	A	R	A	R	R	R	A	A	R	A	R	A	R	R	R	R	R	R	A	R	R	R	A	A	R	NA	R	A	R
ChrV	10.5	A	A	R	A	A	R	A	A	A	A	R	A	A	A	A	A	R	R	R	A	R	A	R	R	R	A	A	R	A	R	A	R	R	R	R	R	R	A	R	R	R	A	A	R	A	R	A	R
ChrV	10.6	A	A	R	NA	A	R	A	A	A	A	R	A	A	NA	NA	A	R	R	R	NA	R	A	R	R	R	A	A	R	NA	R	A	R	R	R	R	R	R	A	R	R	R	NA	A	R	NA	R	A	R
ChrV	10.7	A	A	R	A	A	R	A	A	A	A	R	A	A	A	A	A	R	R	R	A	R	A	R	R	R	A	A	R	A	R	A	R	R	R	R	R	R	A	R	R	R	A	A	R	A	R	A	R
ChrV	10.8	A	A	R	A	A	R	A	A	A	A	R	A	A	A	A	A	R	R	R	NA	R	A	R	R	R	A	A	R	A	R	A	R	R	R	R	R	R	A	R	R	R	A	A	R	A	R	A	R
ChrV	10.9	A	A	R	A	A	R	A	A	A	A	R	A	A	A	NA	A	R	R	R	A	R	A	R	R	R	A	A	R	A	R	A	R	R	R	R	R	R	A	R	R	R	A	A	R	A	R	A	R
ChrV	11	A	A	R	A	A	R	NA	A	A	A	R	A	A	A	A	A	R	R	R	A	R	A	R	R	R	A	A	R	A	R	A	R	R	R	R	R	R	A	R	R	R	A	A	R	A	R	A	R
ChrV	11.1	A	A	R	A	A	R	A	A	A	A	R	A	A	A	A	A	R	R	R	A	R	A	R	R	R	A	A	R	A	R	A	R	R	R	R	R	R	A	R	R	R	A	A	R	A	R	A	R
ChrV	11.2	A	A	R	A	A	R	A	A	A	A	R	A	A	A	A	A	R	R	R	A	R	A	R	R	R	A	NA	R	NA	R	A	R	R	R	R	R	R	A	R	R	R	A	A	R	A	R	A	R
ChrV	11.3	A	A	R	A	A	R	A	NA	A	A	R	A	A	A	A	A	R	R	R	NA	R	A	R	R	R	A	A	R	A	R	A	R	R	R	R	R	R	A	R	R	R	A	A	R	A	R	A	R
ChrV	11.4	A	A	R	A	A	R	A	NA	A	A	R	A	A	A	NA	A	R	R	R	A	R	A	R	R	R	A	A	R	A	R	A	R	R	R	R	R	R	A	R	R	R	A	A	R	A	R	A	R
ChrV	11.5	A	A	R	A	A	R	NA	A	A	A	R	A	A	A	A	NA	R	R	R	A	R	A	R	R	R	A	A	R	A	R	A	R	R	R	R	R	R	A	R	R	R	A	A	R	A	R	A	R
ChrV	11.6	A	A	R	A	A	R	A	A	A	A	R	A	A	A	NA	A	R	R	R	A	NA	A	R	R	R	A	A	R	A	R	A	R	R	R	R	R	R	A	R	R	R	A	A	R	A	NA	A	R
ChrV	11.7	A	A	R	A	A	R	A	A	A	A	R	A	A	A	NA	A	R	R	R	A	R	A	R	R	R	A	A	R	A	R	A	R	R	R	R	R	R	A	R	R	R	A	A	R	A	R	A	R
ChrV	11.8	NA	A	R	A	A	R	A	A	A	A	R	A	A	A	NA	A	R	R	R	A	R	A	R	R	R	A	A	R	A	R	A	R	R	R	R	R	R	A	R	R	R	NA	A	R	NA	R	A	R
ChrV	11.9	NA	A	R	A	A	R	A	NA	A	A	R	NA	A	NA	NA	A	R	R	R	NA	R	A	R	R	R	A	A	R	A	R	A	R	R	R	R	R	R	A	R	R	R	A	A	R	NA	R	A	R
ChrV	12	A	A	R	A	A	R	A	A	A	A	R	A	A	A	NA	A	R	R	R	NA	R	A	R	R	R	A	A	R	A	R	A	R	R	R	R	R	R	A	R	R	R	A	A	R	A	R	A	R
ChrV	12.1	A	A	R	A	A	R	A	NA	A	A	R	A	A	A	A	A	R	R	R	A	R	A	R	R	R	A	A	R	A	R	A	R	R	R	R	R	R	A	R	R	R	A	A	R	A	R	A	R
ChrV	12.2	A	A	R	A	A	R	A	A	A	A	R	A	A	A	NA	A	R	R	R	A	R	A	R	R	R	A	NA	R	A	R	A	R	R	R	R	R	R	A	R	R	R	A	A	R	A	R	A	R
ChrV	12.3	A	A	R	A	A	R	A	A	A	A	R	A	A	A	A	A	R	R	R	A	R	A	R	R	R	A	A	R	A	R	A	R	R	R	R	R	R	A	R	R	R	A	A	R	A	R	A	R
ChrV	12.4	A	A	R	A	A	R	A	NA	A	A	R	A	A	A	A	A	R	R	R	A	R	A	R	R	R	NA	A	R	A	R	A	R	R	R	R	R	R	A	R	R	R	A	A	R	A	R	A	R
ChrV	12.6	A	A	R	A	A	R	A	A	A	A	R	A	A	A	A	A	R	R	R	A	R	A	R	R	R	A	A	R	A	R	A	R	R	R	R	R	NA	A	NA	R	R	A	A	NA	A	NA	A	NA
ChrV	12.7	A	A	R	A	A	R	A	A	A	A	R	A	A	A	A	A	R	R	R	A	NA	A	NA	R	R	A	NA	R	A	R	A	R	R	R	R	R	R	A	NA	R	R	A	A	R	A	R	A	NA
ChrV	12.8	A	A	R	A	A	R	NA	A	A	A	R	A	A	A	A	A	R	R	R	A	NA	A	NA	R	R	A	NA	R	A	R	A	R	R	R	R	R	R	A	R	R	R	A	A	R	A	R	A	R
ChrV	12.9	A	A	R	A	A	R	A	A	A	A	R	A	A	A	A	A	R	R	R	A	R	A	R	R	R	A	A	R	A	R	A	R	R	R	R	R	R	A	R	R	R	A	A	R	A	R	A	R
ChrV	13	A	A	R	A	A	R	A	A	A	A	R	A	A	A	A	A	R	R	R	A	R	A	R	R	R	A	A	R	A	R	A	R	R	R	R	R	R	A	R	R	R	A	A	R	A	R	A	R
ChrV	13.1	A	A	R	A	A	R	A	A	A	A	R	A	A	A	A	A	R	R	R	A	R	A	R	R	R	A	A	R	A	R	A	R	R	R	R	R	R	A	R	R	R	A	A	R	A	R	A	R
ChrV	13.2	A	A	R	A	A	R	A	A	A	A	R	A	A	A	A	A	R	R	R	A	R	A	R	R	R	A	A	R	A	R	A	R	R	R	R	R	R	A	R	R	R	A	A	R	A	R	A	R
ChrV	13.3	NA	A	R	A	A	R	A	NA	A	A	R	A	A	A	NA	A	R	R	R	A	NA	A	NA	R	NA	A	A	R	A	R	A	R	R	R	R	R	R	A	R	R	R	NA	NA	R	NA	R	A	R
ChrV	13.4	A	A	R	NA	A	R	A	A	A	A	R	A	A	A	NA	A	R	R	R	A	NA	A	R	R	R	A	A	R	A	R	A	R	NA	R	R	R	R	A	R	R	R	NA	A	R	A	R	A	R
ChrV	13.5	A	A	R	A	A	R	A	A	A	A	R	A	A	A	A	A	R	R	R	A	R	A	R	R	R	A	A	R	A	R	A	R	R	R	R	R	R	A	R	R	R	A	A	R	A	R	A	R
ChrV	13.6	A	A	R	A	A	R	A	A	A	A	R	A	A	A	A	A	R	R	R	A	R	A	R	R	R	A	A	R	A	R	A	R	R	R	R	R	R	A	R	R	R	A	A	R	A	NA	A	R
ChrV	13.7	NA	A	R	A	A	R	A	A	A	A	R	A	A	A	NA	A	R	R	R	NA	R	A	R	R	R	A	A	R	A	R	A	R	R	R	R	R	R	A	R	R	R	NA	A	R	A	R	NA	R
ChrV	13.8	A	A	R	NA	A	R	A	NA	A	A	R	NA	A	A	NA	A	R	R	R	NA	R	NA	R	R	R	NA	A	R	A	R	A	R	R	R	R	R	R	A	R	R	R	NA	NA	R	NA	NA	NA	R
ChrV	13.9	A	A	R	A	A	R	A	A	A	A	R	A	A	A	A	A	R	R	R	A	NA	A	R	R	R	A	A	R	A	R	A	R	NA	R	R	R	R	A	R	R	R	A	A	R	A	R	A	R
ChrV	14	A	A	R	A	A	R	A	A	A	A	R	A	A	A	A	A	R	R	R	A	NA	A	NA	R	R	A	NA	R	A	R	A	R	R	R	R	R	R	A	R	R	R	A	A	R	A	R	A	NA
ChrV	14.1	A	A	R	NA	A	R	A	NA	A	A	R	A	A	A	NA	A	R	R	R	NA	R	A	R	R	R	NA	NA	R	NA	R	A	R	R	R	R	R	R	A	R	R	R	A	A	R	A	R	A	R
ChrV	14.2	A	A	R	A	A	R	A	A	A	A	R	A	A	A	A	A	R	R	R	A	NA	A	R	R	R	A	A	R	A	R	A	R	R	R	R	R	R	A	R	R	R	A	A	R	A	R	A	R
ChrV	14.3	A	A	R	A	A	R	A	A	A	A	R	A	A	A	A	A	R	R	R	A	R	A	R	R	R	A	A	R	A	R	A	R	R	R	R	R	R	A	R	R	R	A	A	R	A	R	A	R
ChrV	14.4	NA	A	R	A	NA	R	A	NA	A	A	R	A	A	A	NA	A	R	R	R	NA	R	A	R	R	R	NA	NA	R	NA	R	A	R	R	R	R	R	R	A	R	R	R	A	A	R	NA	R	A	R
ChrV	14.5	A	A	R	A	A	R	A	NA	A	A	R	A	A	A	A	A	R	R	R	A	R	A	R	R	R	A	A	R	A	R	A	R	R	R	R	R	R	A	R	R	R	A	NA	R	A	R	A	R
ChrV	14.6	A	A	R	A	A	R	NA	A	A	A	R	R	A	A	A	A	R	R	R	NA	R	A	R	R	R	A	NA	R	A	R	A	R	R	R	R	R	R	A	R	R	R	A	A	R	A	R	A	R
ChrV	14.7	A	A	R	A	A	R	A	A	A	A	R	R	A	A	A	A	R	R	R	A	R	A	R	R	R	A	A	R	A	R	A	R	R	R	R	R	R	A	R	R	R	A	A	R	A	R	A	R
ChrV	14.8	A	A	R	A	A	R	A	A	A	A	R	R	A	A	A	A	R	R	R	A	R	A	R	R	R	A	A	R	A	R	A	R	R	NA	R	R	R	A	R	R	R	A	A	R	A	R	A	R
ChrV	14.9	A	A	R	A	A	R	A	A	A	A	R	R	A	A	A	A	R	R	R	A	R	A	R	R	R	A	A	R	A	R	A	R	R	A	R	R	R	A	R	R	R	A	A	R	A	R	A	R
ChrV	15	A	A	R	A	A	R	A	A	A	A	R	R	NA	NA	A	NA	R	R	R	A	NA	A	R	R	R	A	A	R	A	R	A	R	R	A	R	R	R	A	R	R	R	A	A	R	A	NA	A	NA
ChrV	15.1	A	A	R	A	A	R	A	A	A	A	R	R	A	A	A	A	R	R	R	A	R	A	R	R	R	A	A	R	A	R	A	R	R	A	R	R	R	A	R	R	R	A	A	R	A	R	A	R
ChrV	15.2	A	A	R	A	A	R	A	A	A	A	R	R	A	A	A	A	R	R	R	A	R	A	R	R	R	A	A	R	A	R	A	R	R	A	R	R	R	A	R	R	R	A	A	R	A	R	A	R
ChrV	15.3	A	A	R	A	A	R	A	A	A	A	R	R	R	A	A	A	R	R	R	A	R	A	R	R	R	A	A	R	A	R	A	R	R	A	R	R	R	A	R	R	R	A	A	R	A	R	A	R
ChrV	15.4	A	A	R	A	A	R	A	A	A	A	R	R	R	A	A	A	R	R	R	A	NA	A	NA	R	R	A	A	R	A	R	A	R	R	A	R	R	R	A	R	R	R	A	A	R	A	R	A	R
ChrV	15.5	A	A	R	A	A	R	A	A	A	A	R	R	R	A	A	A	R	R	R	A	R	A	R	R	R	A	A	R	A	R	A	R	R	A	R	R	R	A	R	R	R	A	A	R	A	R	A	R
ChrV	15.6	A	A	R	A	A	R	A	A	A	A	R	R	R	A	A	A	R	R	R	A	R	A	R	R	R	A	A	R	A	R	A	R	R	NA	R	R	R	A	R	R	R	A	A	R	A	R	A	R
ChrV	15.7	A	A	R	A	A	R	A	A	A	A	R	R	R	A	A	A	R	R	R	A	R	A	R	R	R	A	A	R	A	R	A	R	R	A	R	R	R	A	R	R	R	A	A	R	A	R	A	R
ChrV	15.8	A	A	R	A	A	R	A	A	A	A	R	R	R	A	A	A	R	R	R	A	R	A	R	R	R	A	A	R	A	R	A	R	R	A	R	R	R	A	R	R	R	A	A	R	A	R	A	R
ChrV	15.9	A	A	R	A	A	R	A	A	A	A	R	R	R	A	NA	A	R	R	R	NA	R	A	R	R	R	NA	A	R	NA	R	A	R	R	NA	R	R	R	A	R	R	R	A	A	R	A	R	A	R
ChrV	16	A	A	R	NA	A	R	A	NA	A	A	R	R	R	A	A	A	R	R	R	A	R	A	R	R	R	NA	A	R	A	R	A	R	R	A	R	R	R	A	R	R	R	A	A	R	A	R	A	R
ChrV	16.1	A	A	R	A	A	R	A	A	A	A	R	R	R	A	NA	A	R	R	R	A	R	A	R	R	R	A	A	R	A	R	A	R	R	A	R	R	R	A	R	R	R	A	A	R	A	R	A	R
ChrV	16.2	A	A	R	A	A	R	A	A	A	A	R	R	R	A	NA	A	R	R	R	A	R	A	R	R	R	NA	A	R	A	R	A	R	R	NA	R	R	R	A	R	R	R	A	A	R	A	R	A	R
ChrV	16.3	A	A	R	A	A	R	A	A	A	A	R	R	R	A	A	A	R	R	R	A	R	A	R	R	R	A	A	R	A	R	A	R	R	A	R	R	R	A	R	R	R	A	A	R	A	R	A	R
ChrV	16.4	A	A	R	A	A	R	A	A	A	A	R	R	R	A	A	A	R	R	R	A	R	A	R	R	R	A	A	R	A	R	A	R	R	A	R	R	R	A	R	R	R	A	A	R	A	R	A	R
ChrV	16.5	A	A	R	NA	A	R	NA	A	A	A	R	R	R	A	A	A	R	R	R	NA	R	A	R	R	R	A	A	R	A	R	A	R	R	A	R	R	R	A	R	R	R	A	NA	R	NA	R	A	R
ChrV	16.6	A	A	R	A	A	R	A	A	A	A	R	R	R	A	A	A	R	R	R	A	R	A	R	R	R	A	A	R	A	R	A	R	R	A	R	R	R	A	R	R	R	A	A	R	A	R	A	R
ChrV	16.7	A	A	R	A	A	R	A	NA	A	A	R	R	R	A	A	A	R	R	R	NA	R	A	R	R	R	A	A	R	A	R	A	R	R	NA	R	R	R	A	R	R	R	A	A	R	A	R	A	R
ChrV	16.8	A	A	R	A	A	R	A	A	A	A	R	R	R	A	A	A	R	R	R	A	R	A	R	R	R	NA	A	R	A	R	A	R	R	NA	R	R	R	A	R	R	R	A	A	R	A	R	A	R
ChrV	16.9	A	A	R	A	A	R	A	A	A	A	R	R	R	A	NA	A	R	R	R	A	NA	A	R	R	R	A	A	R	A	R	A	R	R	A	R	R	R	A	R	R	R	A	A	R	A	R	A	R
ChrV	17	A	A	R	A	A	R	A	A	A	A	R	R	R	A	A	A	R	R	R	A	R	A	R	R	R	A	A	R	A	R	A	R	R	A	R	R	R	A	R	R	R	A	A	R	A	R	A	NA
ChrV	17.2	A	A	R	A	A	R	A	A	A	A	R	R	R	A	A	A	R	R	R	A	R	A	R	R	R	A	A	R	A	R	A	R	R	A	R	R	R	A	R	R	R	A	A	R	A	R	A	A
ChrV	17.3	A	A	R	A	A	R	A	A	A	A	R	R	R	A	NA	A	R	R	R	NA	R	A	R	R	R	A	NA	R	NA	R	A	R	R	A	R	R	R	A	R	R	R	A	A	R	NA	R	A	A
ChrV	17.4	A	A	R	A	A	R	A	A	A	A	R	R	R	A	A	A	R	R	R	A	R	A	R	R	R	A	A	R	A	R	A	R	R	A	R	R	R	A	R	R	R	A	A	R	A	R	A	A
ChrV	17.5	A	A	R	A	A	R	A	A	A	A	R	R	R	A	NA	A	R	R	R	A	R	A	R	R	R	A	A	R	A	R	A	R	R	A	R	R	R	A	R	R	R	A	A	R	A	R	A	A
ChrV	17.6	A	A	R	A	A	R	A	A	A	A	R	R	R	A	A	A	R	R	R	A	R	A	R	R	R	A	A	R	A	R	A	R	R	A	R	R	R	A	R	R	R	A	A	R	A	R	A	A
ChrV	17.7	A	A	R	A	A	R	A	A	A	A	R	R	R	A	A	A	R	R	R	A	R	A	R	R	R	A	A	R	A	R	A	R	R	NA	R	R	R	A	R	R	R	A	A	R	A	R	A	A
ChrV	17.8	A	A	R	A	A	R	A	A	A	A	R	R	NA	A	A	A	R	R	R	A	NA	A	R	R	R	A	A	R	A	R	NA	R	R	A	R	R	R	A	R	R	R	A	A	R	A	NA	A	A
ChrV	17.9	A	A	R	A	A	R	A	A	A	A	R	R	R	A	A	A	R	R	R	A	R	A	R	R	R	A	A	R	A	R	A	R	R	A	R	R	R	A	R	R	R	A	A	R	A	R	A	A
ChrV	18	A	A	R	A	A	R	A	NA	A	A	R	R	R	A	NA	A	R	R	R	NA	R	A	R	R	R	A	A	R	A	R	A	R	R	NA	R	R	R	A	R	R	R	A	A	R	A	R	A	A
ChrV	18.1	A	A	R	A	A	R	A	A	A	A	R	R	R	A	A	A	R	R	R	A	R	A	R	R	R	A	A	R	A	R	A	R	R	A	R	R	R	A	R	R	R	A	A	R	A	R	A	A
ChrV	18.2	A	A	R	A	A	R	A	A	A	A	R	R	R	A	NA	A	R	R	R	NA	NA	A	R	R	R	NA	A	R	A	R	A	R	R	NA	R	R	R	A	R	R	R	A	A	R	NA	R	A	A
ChrV	18.3	A	A	R	A	A	R	A	A	A	A	R	R	R	A	A	A	R	R	R	NA	R	A	R	R	R	A	A	R	A	R	A	R	R	NA	R	R	R	A	R	R	R	A	A	R	A	R	A	A
ChrV	18.4	A	NA	R	A	A	R	A	NA	A	A	R	R	R	A	A	A	R	R	R	NA	R	A	R	R	R	A	A	R	A	R	A	R	R	A	R	R	R	A	R	R	R	A	A	R	A	R	A	A
ChrV	18.5	A	A	R	A	A	R	A	A	A	A	R	R	R	A	A	A	R	R	R	A	R	A	R	R	R	A	A	NA	A	R	A	R	R	A	R	R	R	A	R	R	R	A	A	R	A	R	A	A
ChrV	18.6	A	A	R	A	A	R	A	A	A	A	R	R	R	A	A	A	R	R	R	A	R	A	R	R	R	A	A	A	A	R	A	R	R	NA	R	R	R	A	R	R	R	A	A	R	A	R	A	A
ChrV	18.7	A	A	R	A	A	R	R	A	A	A	R	R	R	A	A	A	R	R	R	A	R	A	R	R	R	A	NA	A	A	R	A	R	R	A	R	R	R	A	R	R	NA	A	A	R	A	R	A	A
ChrV	18.8	A	A	R	A	A	R	R	A	A	A	R	R	R	A	NA	A	R	R	R	A	R	A	R	R	R	NA	A	A	NA	R	A	R	R	NA	R	R	R	A	R	R	A	A	NA	A	A	R	A	A
ChrV	18.9	A	A	R	A	A	R	R	A	A	A	R	R	R	A	A	A	R	R	R	A	R	A	R	R	R	A	A	A	A	R	A	R	R	NA	R	R	R	A	R	R	A	A	A	A	A	R	A	A
ChrV	19	A	A	R	A	A	R	R	NA	A	A	R	R	R	A	A	A	R	R	R	A	R	A	R	R	R	A	A	A	A	R	A	R	R	A	R	R	R	A	R	R	A	A	A	A	A	R	A	A
ChrV	19.1	A	A	R	A	A	R	R	A	A	A	R	R	R	A	NA	A	R	R	R	A	R	A	R	R	R	A	NA	A	A	R	A	R	R	A	R	R	R	A	R	R	A	A	A	A	A	R	A	A
ChrV	19.2	A	A	R	A	A	R	R	NA	A	A	R	R	R	A	NA	A	R	R	R	NA	R	A	R	R	R	A	A	A	A	R	A	R	R	NA	R	R	R	A	R	R	A	A	A	A	A	R	A	A
ChrV	19.3	A	A	R	A	A	R	R	A	A	A	R	R	R	A	NA	A	R	R	R	A	R	A	R	R	R	NA	A	A	A	R	A	R	R	NA	R	R	R	A	R	R	A	A	A	A	A	R	A	A
ChrV	19.4	A	A	R	A	A	R	R	A	A	A	R	R	R	A	NA	A	R	R	R	A	R	A	R	R	R	A	A	A	A	R	A	R	R	A	R	R	R	A	R	R	A	A	A	A	A	R	A	A
ChrV	19.5	A	A	R	A	A	R	R	A	NA	A	R	R	R	A	A	A	R	R	R	A	R	A	R	R	R	A	NA	A	A	R	A	R	R	A	R	R	R	A	R	R	A	A	A	A	A	R	A	A
ChrV	19.6	A	A	R	A	A	R	R	A	A	A	R	R	R	A	A	A	R	A	R	A	R	A	R	R	R	A	A	A	A	R	A	R	R	A	R	R	R	A	R	R	A	A	A	A	A	R	A	A
ChrV	19.7	A	A	R	A	A	R	R	A	A	A	R	R	R	NA	A	A	R	A	R	A	R	A	R	R	R	A	A	A	A	R	A	R	R	A	R	R	R	A	R	R	A	A	A	A	A	R	A	A
ChrV	19.9	A	A	R	A	A	R	R	A	A	A	R	R	R	A	A	A	NA	A	R	A	R	A	R	R	R	NA	A	A	A	R	A	R	R	A	R	R	R	A	R	R	A	A	A	A	A	R	A	A
ChrV	20	A	A	NA	A	A	R	R	A	A	A	R	R	R	A	A	A	R	A	R	A	R	A	R	R	R	A	A	A	A	R	A	R	R	A	R	R	R	A	R	R	A	A	A	A	A	R	A	A
ChrV	20.1	A	A	R	A	A	R	R	A	A	A	R	R	R	A	A	A	R	A	R	A	R	A	R	R	R	A	NA	A	A	R	A	R	R	A	R	R	R	A	R	R	A	A	A	A	A	R	A	A
ChrV	20.2	A	A	R	A	A	R	R	A	A	A	R	R	R	A	A	A	R	A	R	A	R	A	R	R	R	A	NA	A	A	R	A	R	R	A	R	R	R	A	R	R	A	A	A	A	A	R	A	A
ChrV	20.3	A	A	R	A	A	R	R	A	A	A	R	R	R	A	A	A	R	A	R	NA	NA	A	R	R	R	A	A	A	A	R	A	R	R	A	R	R	R	A	R	R	A	A	A	A	A	R	A	A
ChrV	20.4	NA	A	R	NA	A	R	R	A	NA	A	R	R	R	A	NA	A	R	A	R	A	R	A	R	R	R	NA	NA	NA	NA	R	A	R	R	A	R	R	R	A	A	R	NA	A	A	A	A	R	NA	A
ChrV	20.5	A	A	R	A	A	R	R	A	NA	A	R	R	R	A	A	A	R	A	R	A	R	A	R	R	R	A	NA	A	A	R	A	R	R	A	R	R	R	A	A	R	A	A	A	A	A	R	A	A
ChrV	20.6	A	A	R	NA	A	R	R	NA	R	A	R	R	R	A	A	A	R	A	R	A	A	A	R	R	R	A	A	A	A	R	A	R	R	A	R	R	R	A	A	R	A	A	A	A	A	R	A	A
ChrV	20.7	A	A	R	R	A	R	R	A	R	A	R	R	R	A	A	A	R	A	R	A	NA	A	R	R	R	A	A	A	A	R	A	R	R	A	R	R	R	A	A	R	A	A	A	A	A	R	A	A
ChrV	20.8	A	A	R	R	A	R	R	A	R	A	R	NA	R	A	A	A	R	A	R	A	A	A	R	R	R	A	A	A	A	R	A	R	R	A	R	R	NA	A	A	R	A	A	A	A	A	R	A	A
ChrV	20.9	A	A	R	R	A	R	R	A	R	A	R	R	R	A	A	A	R	A	R	A	A	A	R	R	R	A	A	A	A	R	A	R	R	A	R	R	R	A	A	R	A	A	A	A	A	R	A	A
ChrV	21	A	NA	R	R	A	R	R	A	R	A	R	R	R	A	NA	A	R	A	R	NA	NA	A	R	R	R	NA	NA	A	NA	R	NA	R	R	A	R	R	R	A	A	R	NA	A	A	A	A	R	A	A
ChrV	21.1	NA	NA	R	R	NA	R	R	NA	R	A	R	R	R	A	NA	NA	R	A	R	NA	NA	A	R	R	R	NA	NA	A	A	R	A	R	R	NA	R	R	R	A	A	R	NA	A	A	NA	NA	R	A	A
ChrV	21.2	A	A	R	R	A	R	NA	A	R	A	R	R	R	A	A	A	R	A	R	A	A	A	R	R	R	A	A	A	A	R	A	R	R	NA	R	R	R	A	A	R	A	A	A	A	A	R	A	A
ChrV	21.3	A	A	R	R	A	R	R	A	R	A	R	R	R	A	A	A	R	A	R	NA	A	A	R	R	R	A	A	A	A	R	A	R	R	A	R	R	R	A	A	R	A	A	A	A	A	R	A	A
ChrV	21.4	A	A	R	R	A	R	R	A	R	A	R	R	R	A	A	A	R	A	R	A	A	A	R	R	R	A	A	A	A	R	A	R	R	A	R	R	R	A	A	R	A	A	A	A	A	R	A	A
ChrV	21.5	A	A	R	R	A	R	R	A	R	A	R	R	R	A	A	A	R	A	R	A	A	A	R	R	R	A	A	A	A	R	A	R	R	A	R	R	R	A	A	R	A	A	A	A	A	R	A	A
ChrV	21.6	A	A	R	R	A	R	R	A	R	A	R	R	R	A	A	A	R	A	R	A	A	A	R	R	R	A	A	A	A	R	A	R	R	A	R	R	R	A	A	R	A	A	A	A	A	R	A	A
ChrV	21.8	A	A	R	R	A	R	R	NA	R	A	R	NA	R	A	A	A	R	A	R	NA	A	A	R	R	R	A	A	A	A	R	A	R	R	A	R	R	R	NA	A	R	A	NA	A	A	A	R	A	A
ChrV	21.9	A	A	R	R	A	R	R	A	R	A	R	R	R	A	A	A	R	A	R	A	A	A	R	R	R	A	NA	A	A	R	A	R	R	A	R	R	R	A	A	R	A	A	A	A	A	R	A	A
ChrV	22	A	NA	R	R	A	R	R	R	R	NA	R	R	R	A	A	NA	R	A	R	NA	NA	A	R	NA	R	NA	NA	NA	A	R	NA	R	R	A	R	R	R	A	A	R	NA	NA	NA	A	A	R	NA	A
ChrV	22.1	A	A	R	R	A	R	R	R	R	A	R	R	R	A	A	A	R	A	R	A	A	A	R	R	R	A	A	A	A	R	A	R	R	A	R	R	R	A	A	R	A	A	A	A	A	R	A	A
ChrV	22.2	A	A	R	R	A	R	R	R	R	A	R	R	R	A	A	A	R	A	R	A	A	A	R	R	R	NA	NA	A	NA	R	A	R	R	A	R	R	R	A	A	R	A	A	A	A	A	R	A	A
ChrV	22.3	A	A	R	R	A	R	R	R	R	A	R	R	R	A	A	A	R	A	R	A	A	A	R	R	R	A	NA	NA	A	R	A	R	R	A	R	R	R	A	A	R	A	A	A	A	A	R	A	A
ChrV	22.4	A	A	R	R	A	R	R	R	R	A	R	R	R	A	A	A	R	A	R	A	A	A	R	R	R	A	A	A	A	R	A	R	R	A	R	R	R	A	A	R	A	A	A	A	A	R	A	A
ChrV	22.5	A	A	R	R	A	R	R	R	R	A	R	R	R	A	NA	A	R	A	R	A	A	A	R	R	R	A	A	A	A	R	A	R	R	A	R	R	R	A	A	R	A	A	A	A	A	R	A	A
ChrV	22.6	A	NA	NA	R	A	NA	NA	R	R	A	NA	R	NA	A	A	A	R	A	R	NA	A	NA	R	R	NA	A	A	A	A	R	A	R	R	A	NA	NA	R	A	A	R	A	A	A	A	A	NA	A	A
ChrV	22.7	A	A	R	R	A	R	R	R	R	A	R	R	R	A	A	A	R	A	R	A	A	A	R	R	R	A	A	NA	A	R	A	R	R	NA	R	R	R	A	A	R	A	A	A	A	A	R	A	A
ChrV	22.8	A	A	R	R	A	R	R	R	R	A	R	R	R	A	A	A	R	A	R	A	A	A	R	R	R	A	A	A	A	R	A	R	R	A	R	R	R	A	A	R	A	A	A	A	A	R	A	A
ChrV	22.9	A	A	R	R	A	R	R	R	R	A	R	R	R	A	NA	A	R	A	R	A	NA	A	R	R	R	A	A	A	A	R	A	R	R	A	R	R	R	A	A	R	A	A	A	A	A	R	A	A
ChrV	23	A	A	R	R	A	R	R	R	R	A	R	R	R	A	A	A	R	A	R	NA	A	A	R	R	R	NA	A	NA	A	R	A	R	R	A	R	R	R	A	A	R	A	A	A	A	A	R	A	A
ChrV	23.1	A	A	NA	R	A	R	R	R	R	NA	R	R	R	A	NA	A	R	A	R	A	A	NA	R	R	R	A	A	A	A	R	A	R	R	A	R	R	R	A	A	R	A	A	A	A	A	R	A	A
ChrV	23.2	A	A	R	R	A	R	R	R	R	A	R	R	R	A	A	A	R	A	R	A	A	A	R	R	R	A	A	A	A	R	A	R	R	A	R	R	R	A	A	R	A	R	A	A	A	R	A	A
ChrV	23.3	A	A	R	R	A	R	R	R	R	A	R	R	R	A	NA	A	R	A	R	A	A	NA	R	R	R	A	NA	A	A	R	A	R	R	A	R	R	R	A	A	R	A	R	A	A	A	R	A	A
ChrV	23.4	A	A	R	R	A	R	R	R	R	A	R	R	R	A	A	A	R	A	R	A	A	NA	NA	R	R	A	A	A	A	R	A	R	R	A	R	R	R	A	A	R	A	R	A	A	A	R	A	A
ChrV	23.5	A	A	R	R	A	R	R	R	R	A	R	R	R	A	A	A	R	A	R	A	A	A	R	R	R	A	A	A	A	R	A	R	R	A	R	R	R	A	A	R	A	R	A	A	A	R	A	A
ChrV	23.6	A	NA	R	R	A	R	R	R	R	A	R	R	R	A	A	A	R	A	R	A	A	NA	R	R	R	A	NA	A	A	R	A	R	R	A	R	R	R	A	A	R	A	R	NA	A	A	R	A	A
ChrV	23.7	A	A	R	R	A	R	R	R	R	A	R	R	R	A	A	A	R	A	R	A	A	A	R	R	R	A	A	A	A	R	A	R	R	NA	R	R	R	A	A	R	A	R	A	A	A	R	A	A
ChrV	23.8	A	A	R	R	A	R	R	R	R	A	R	R	R	A	NA	A	R	A	R	A	A	A	R	R	R	A	A	A	A	R	A	R	R	A	R	R	R	A	A	R	A	R	A	A	A	R	A	A
ChrX	0	R	A	A	R	A	R	R	A	A	R	R	A	R	A	R	R	A	A	A	R	A	R	R	R	A	R	A	R	A	A	R	A	R	NA	R	A	R	A	R	A	A	A	R	A	R	NA	R	A
ChrX	0.1	R	A	A	R	A	R	R	A	A	R	R	A	R	A	R	R	A	A	A	R	NA	R	R	R	A	R	NA	R	A	A	R	A	R	R	R	A	R	A	R	A	A	A	R	A	R	A	R	A
ChrX	0.2	R	A	A	R	A	R	R	A	A	R	R	A	R	A	R	R	A	A	A	R	A	R	NA	R	A	R	A	R	A	A	R	A	R	R	R	A	R	A	R	A	A	A	R	A	R	A	R	A
ChrX	0.3	R	A	NA	R	A	R	NA	A	A	R	R	A	R	A	R	R	A	A	A	R	NA	R	R	R	A	NA	A	R	A	A	R	A	R	R	NA	A	R	A	R	A	A	A	R	A	R	A	R	A
ChrX	0.4	R	A	A	R	A	R	R	A	A	R	R	A	R	A	R	R	A	A	A	R	A	R	R	R	A	R	A	R	A	A	R	A	R	R	R	A	R	A	R	A	A	A	R	A	R	A	R	NA
ChrX	0.5	R	A	A	R	A	R	R	A	A	R	R	A	R	A	R	R	A	A	A	R	A	R	R	R	A	R	A	R	A	A	R	A	R	R	R	A	R	A	R	A	A	A	R	A	R	A	R	A
ChrX	0.7	R	A	A	R	A	R	R	A	A	R	R	A	R	A	R	R	A	A	A	R	A	R	R	R	A	R	A	R	A	A	R	A	R	R	R	A	R	A	R	A	A	A	R	A	R	A	R	A
ChrX	0.8	R	A	A	R	A	R	R	A	A	R	R	A	R	A	R	R	A	A	A	R	A	R	R	R	A	R	A	R	A	A	R	A	R	R	R	A	R	A	R	A	A	A	R	A	R	A	R	A
ChrX	0.9	R	A	A	R	A	R	R	A	A	R	R	A	R	A	R	R	A	A	A	R	A	R	R	R	A	R	NA	R	A	A	R	A	R	R	R	A	R	A	R	A	A	A	R	A	R	A	R	A
ChrX	1	R	A	A	R	A	R	R	A	A	R	R	A	R	A	R	R	A	A	A	R	A	R	R	R	A	R	A	R	A	A	R	A	R	R	R	A	R	A	R	A	A	A	R	A	R	A	R	A
ChrX	1.1	R	A	A	R	A	R	R	A	A	R	R	A	R	A	R	R	NA	A	A	R	A	R	R	R	A	R	A	R	A	A	R	A	R	R	R	A	R	A	R	A	A	A	R	A	R	A	R	A
ChrX	1.2	R	A	A	R	A	R	R	A	A	R	R	A	R	A	R	R	A	A	A	R	A	R	R	R	A	R	A	R	A	A	R	A	R	R	R	A	R	A	R	A	A	A	R	A	R	A	R	A
ChrX	1.3	R	A	A	R	A	R	R	A	A	R	R	A	R	A	R	R	A	A	A	R	A	R	R	R	A	R	A	R	A	A	R	A	R	R	R	A	R	A	R	A	A	A	R	A	R	A	R	A
ChrX	1.4	R	A	A	R	A	R	R	A	A	R	R	A	R	A	R	R	A	A	A	R	A	R	R	R	A	R	A	R	A	A	R	A	R	R	R	A	R	A	R	A	A	A	R	A	R	A	R	A
ChrX	1.5	R	A	NA	R	A	R	R	A	A	R	R	A	R	A	R	R	A	A	A	NA	NA	R	R	R	A	R	A	R	A	A	R	NA	R	R	R	A	R	A	R	A	A	A	R	A	R	A	R	A
ChrX	1.6	R	A	R	R	A	R	R	A	A	R	R	A	R	A	R	R	A	A	A	R	R	R	R	R	A	A	A	R	A	A	R	A	R	R	A	A	R	A	R	A	A	A	R	A	R	A	R	A
ChrX	1.7	R	A	R	R	A	R	R	A	A	R	R	A	R	A	R	R	A	A	A	R	R	R	R	R	A	A	A	R	A	A	R	A	R	R	A	A	R	A	R	A	A	A	R	A	R	A	R	NA
ChrX	1.8	R	A	R	R	A	R	R	A	A	R	R	A	R	A	R	R	A	A	A	R	R	R	R	R	A	A	A	R	A	A	R	A	R	R	A	A	R	A	R	A	A	A	R	A	R	NA	R	A
ChrX	1.9	R	A	R	R	A	R	R	A	A	R	R	A	R	A	R	R	A	A	A	R	R	R	R	R	A	A	A	R	A	A	R	A	R	R	A	A	R	A	R	A	A	A	R	A	R	A	R	A
ChrX	2	R	A	R	R	A	R	R	A	A	R	R	A	R	A	R	R	A	A	A	R	R	R	R	R	A	A	A	R	A	A	R	A	R	R	A	A	R	A	R	A	A	A	R	A	R	A	R	A
ChrX	2.1	R	NA	R	R	NA	R	R	A	A	R	R	A	R	A	R	R	A	A	A	R	R	R	R	R	NA	A	NA	R	A	A	R	NA	R	R	A	A	R	NA	R	A	NA	A	R	NA	R	A	R	A
ChrX	2.2	R	NA	R	R	A	R	R	A	A	R	R	NA	R	A	R	R	A	NA	A	R	R	R	R	R	NA	NA	A	R	NA	A	R	A	NA	R	A	NA	R	A	R	A	A	NA	R	NA	R	NA	R	A
ChrX	2.3	R	A	R	R	A	NA	R	A	A	R	R	A	R	A	R	R	A	A	A	R	R	R	R	R	A	A	A	R	A	A	R	A	R	R	A	A	R	A	R	A	A	A	R	A	R	A	R	A
ChrX	2.4	R	A	R	R	A	A	R	A	A	R	R	A	R	A	R	R	A	A	A	R	R	R	R	R	A	A	NA	R	A	A	R	A	R	R	A	A	R	A	R	A	A	A	R	A	R	A	R	A
ChrX	2.5	R	A	R	R	A	A	R	A	A	R	R	A	R	A	R	R	A	A	A	R	R	R	R	R	A	A	A	R	A	A	R	A	R	R	A	A	R	A	R	A	A	A	R	A	R	A	R	A
ChrX	2.6	R	A	R	R	A	A	R	A	A	R	R	A	R	A	R	R	A	A	A	R	R	R	R	R	A	A	A	R	A	A	R	A	R	R	A	A	R	A	R	A	A	A	R	A	R	A	R	A
ChrX	2.7	R	A	R	NA	A	A	R	A	A	R	R	A	R	NA	NA	R	NA	A	NA	R	R	R	R	R	A	A	A	NA	A	A	R	NA	R	R	A	A	NA	A	R	A	A	A	R	NA	R	A	R	A
ChrX	2.8	R	A	R	A	A	A	R	A	A	R	R	A	R	A	A	R	A	A	A	R	R	R	R	R	A	A	A	R	A	A	R	R	R	R	A	A	A	A	R	A	A	A	R	A	R	A	R	A
ChrX	2.9	R	A	R	A	A	A	R	A	A	R	R	A	R	A	A	R	A	A	A	R	R	R	R	R	A	A	A	R	A	A	R	R	R	R	A	A	A	A	R	A	A	A	R	A	R	A	R	A
ChrX	3	R	A	R	A	A	A	R	A	A	R	R	A	R	NA	A	R	NA	A	A	R	R	R	R	R	A	A	A	R	NA	A	R	R	R	R	A	A	A	A	R	A	A	A	R	A	R	A	R	A
ChrX	3.1	R	A	R	A	A	A	R	A	A	R	R	A	R	A	A	R	A	A	A	R	R	R	R	R	A	A	A	R	A	A	R	R	R	R	A	A	A	A	R	A	A	A	R	A	R	A	R	A
ChrX	3.2	R	A	R	A	A	A	R	A	A	R	R	A	R	A	A	R	NA	A	A	R	R	R	R	R	A	NA	A	R	A	A	R	R	R	R	A	A	A	A	R	A	A	A	R	A	R	A	R	A
ChrX	3.3	R	A	R	A	A	A	R	A	A	R	R	A	R	A	A	R	A	A	A	R	R	R	R	R	A	A	A	R	A	A	R	R	R	R	A	A	A	A	R	A	A	A	R	A	R	A	R	A
ChrX	3.4	R	A	R	A	A	A	R	A	A	R	R	A	R	A	A	R	A	A	A	R	R	R	R	R	A	A	A	R	A	A	R	R	R	R	A	A	A	A	R	A	A	A	R	A	R	A	R	A
ChrX	3.5	R	A	R	A	A	A	R	A	A	R	R	A	R	A	A	R	A	A	A	R	R	R	R	R	A	A	A	R	A	A	R	R	R	R	A	A	A	A	R	A	A	A	R	A	R	A	R	A
ChrX	3.6	R	A	R	A	A	A	R	A	A	R	R	A	R	A	A	R	A	A	A	R	R	R	R	R	A	A	NA	R	A	A	R	R	R	R	A	A	A	A	R	A	A	A	R	A	R	A	R	NA
ChrX	3.7	R	A	R	A	A	A	R	A	A	R	R	A	R	A	A	R	A	A	A	R	R	R	R	R	A	A	A	R	A	A	R	R	R	R	A	A	A	A	R	A	A	A	R	A	R	A	R	A
ChrX	3.8	R	A	R	A	A	A	R	A	A	R	R	A	R	A	A	R	A	A	A	R	R	R	R	R	A	A	A	R	A	A	R	R	R	R	A	A	A	A	R	A	A	A	R	A	R	A	R	A
ChrX	3.9	R	A	R	A	A	A	R	A	A	R	R	A	R	A	A	R	A	A	A	R	R	R	R	R	A	A	A	R	A	A	R	R	R	R	A	A	A	A	R	A	A	A	R	A	R	A	R	A
ChrX	4	R	A	R	A	A	A	R	A	A	R	R	A	R	A	A	R	A	NA	A	R	R	R	R	R	A	A	A	R	A	A	R	R	R	R	A	A	A	A	R	A	A	A	R	A	R	NA	R	A
ChrX	4.1	R	A	R	A	A	A	R	A	A	R	R	A	R	A	A	R	A	A	A	R	R	R	R	R	A	A	A	R	A	A	R	R	R	R	A	A	A	A	R	A	A	A	R	A	R	A	R	A
ChrX	4.2	A	R	R	A	A	A	R	A	A	R	R	A	A	NA	A	R	A	A	A	R	R	R	A	R	R	A	R	R	A	A	R	R	R	NA	A	A	A	A	R	A	R	A	R	A	A	A	R	A
ChrX	4.3	A	R	R	A	A	A	R	A	A	R	R	A	A	NA	NA	R	A	A	A	R	R	R	A	R	R	A	R	R	A	A	R	R	R	A	A	A	A	A	R	A	R	A	R	A	A	A	R	A
ChrX	4.4	A	R	R	A	A	A	R	A	A	R	R	A	A	NA	A	R	A	A	A	R	R	R	A	R	R	A	R	R	A	A	R	R	R	A	A	A	A	A	R	A	R	A	R	A	A	NA	R	A
ChrX	4.5	A	R	R	A	A	A	R	A	A	R	R	A	A	A	A	R	A	A	A	R	R	R	A	R	R	A	R	R	A	A	R	R	R	A	A	A	A	A	R	A	R	A	R	A	A	A	R	A
ChrX	4.6	A	R	R	A	A	A	R	A	A	R	R	A	A	A	A	R	A	A	A	R	R	R	A	R	R	A	R	R	A	A	R	R	R	A	A	A	A	A	R	A	R	A	R	A	A	A	R	A
ChrX	4.7	A	R	R	A	A	A	R	A	A	R	R	A	A	A	A	R	A	A	A	R	R	R	A	R	R	A	R	R	A	A	R	R	R	A	A	A	A	A	R	A	R	A	R	A	A	A	R	A
ChrX	4.8	A	R	R	A	A	A	R	A	A	R	R	A	A	A	A	R	A	A	A	R	R	R	A	R	R	A	R	R	A	A	R	R	R	A	A	A	A	A	R	A	R	A	R	A	A	A	R	A
ChrX	4.9	A	R	R	A	A	A	R	A	A	R	R	A	A	A	A	R	A	A	A	R	R	R	A	R	R	A	R	R	A	A	R	R	R	A	A	A	A	A	R	A	R	A	R	A	A	NA	R	A
ChrX	5	A	R	R	A	A	A	R	A	A	R	R	A	A	A	A	R	NA	A	A	R	R	R	NA	R	R	NA	R	R	A	A	R	R	R	A	A	A	A	A	R	A	R	A	R	A	A	A	R	A
ChrX	5.1	A	R	R	A	A	A	R	A	A	R	R	A	A	A	A	R	A	A	A	R	R	R	NA	R	R	A	R	R	A	A	R	R	R	A	A	A	A	A	R	A	R	A	R	A	A	A	R	A
ChrX	5.2	A	R	R	A	A	A	R	A	A	R	R	A	A	A	A	R	A	A	A	R	R	R	A	R	R	A	R	R	A	A	R	R	R	A	A	A	A	A	R	A	R	A	R	A	A	A	R	A
ChrX	5.3	A	R	R	A	A	A	R	NA	A	R	R	A	A	A	A	R	A	A	A	R	R	R	A	R	R	A	R	R	A	A	R	R	R	A	A	A	A	A	R	A	R	A	R	A	A	A	R	A
ChrX	5.4	A	R	R	NA	A	A	R	A	A	R	R	A	A	A	A	R	A	A	A	R	R	R	A	R	R	A	R	R	A	A	R	R	R	A	A	A	A	A	R	A	R	A	R	A	A	A	R	A
ChrX	5.5	A	R	R	A	A	A	R	A	A	R	R	A	A	A	A	R	A	A	A	R	R	R	A	R	R	A	R	R	A	A	R	R	R	A	A	A	A	A	R	A	R	A	R	A	A	A	R	A
ChrX	5.6	A	R	R	A	A	A	R	A	A	R	R	A	A	A	A	R	A	A	A	R	R	R	A	R	R	A	R	R	A	A	R	R	R	A	A	A	A	A	R	A	R	A	R	A	A	A	R	A
ChrX	5.7	A	R	R	A	A	A	R	A	A	R	R	A	A	A	NA	R	A	A	A	R	R	R	A	R	R	A	R	R	A	A	R	R	R	A	A	A	A	A	R	A	R	A	R	A	A	A	R	A
ChrX	5.8	A	R	R	A	A	A	R	A	A	R	R	A	A	NA	A	R	A	A	A	R	R	R	A	R	R	A	R	R	A	A	R	R	R	A	A	A	A	A	R	A	R	A	R	A	A	A	R	A
ChrX	5.9	A	R	R	A	A	A	R	A	A	R	R	A	A	A	A	R	A	A	A	R	R	R	A	R	R	A	R	R	A	A	R	R	R	A	A	A	A	A	R	A	R	A	R	A	A	A	R	A
ChrX	6	A	R	R	A	A	A	R	A	A	R	R	A	A	A	A	R	A	A	A	R	R	R	A	R	R	A	R	R	A	A	R	R	R	A	A	A	A	A	R	A	R	A	R	A	A	A	R	A
ChrX	6.1	A	R	R	A	A	A	R	A	A	R	R	A	A	A	A	R	A	A	A	R	R	R	A	R	R	A	R	R	A	A	R	R	R	A	A	A	A	A	R	A	R	A	R	A	A	A	R	A
ChrX	6.2	A	R	R	A	A	A	NA	A	A	R	R	A	A	A	A	R	A	A	A	R	R	R	A	R	R	A	R	R	A	A	R	R	R	A	A	A	A	A	R	A	R	A	R	A	A	A	R	A
ChrX	6.3	A	R	R	A	A	A	A	A	A	R	R	A	A	A	A	R	A	A	A	R	R	R	A	R	R	A	R	R	A	A	R	R	R	A	A	A	A	A	R	A	R	A	R	A	A	A	R	A
ChrX	6.4	A	R	R	A	A	A	A	A	A	R	R	A	A	A	A	R	A	A	A	R	R	R	A	R	R	A	R	R	A	A	R	R	R	A	A	A	A	A	R	A	R	A	R	A	A	A	R	A
ChrX	6.6	A	R	R	A	A	A	A	A	A	R	R	A	A	A	A	R	A	A	A	R	R	R	A	R	R	A	R	R	A	A	R	R	R	NA	A	A	A	A	R	A	R	A	R	A	A	A	R	A
ChrX	6.7	A	R	R	A	A	A	A	A	A	R	R	A	A	A	A	R	A	A	A	R	R	R	A	R	R	A	R	R	A	A	R	R	R	A	A	A	A	A	R	A	R	A	R	A	A	A	R	NA
ChrX	6.8	A	R	R	A	A	A	A	A	A	R	R	A	A	A	A	R	A	A	A	R	R	R	A	R	R	A	R	R	A	A	R	R	R	A	A	A	A	A	R	A	R	A	R	A	A	A	R	A
ChrX	6.9	A	R	R	A	A	A	A	A	A	R	R	A	A	A	A	R	A	A	A	R	R	R	A	R	R	A	R	R	A	A	R	R	R	A	A	A	A	A	R	A	R	A	R	A	A	A	R	A
ChrX	7	A	R	R	A	A	A	A	A	A	R	R	A	A	A	A	R	A	A	A	R	R	R	A	R	R	A	R	R	A	A	R	R	R	A	A	A	A	A	R	A	R	A	R	A	A	A	R	A
ChrX	7.1	A	R	R	A	A	A	A	A	A	R	R	A	A	A	A	R	A	A	A	R	R	R	A	R	R	A	R	R	A	A	R	R	R	A	A	A	A	A	R	A	R	A	R	A	A	NA	R	A
ChrX	7.2	A	R	R	A	A	A	A	A	A	R	R	A	A	A	A	R	A	A	A	R	R	R	A	R	R	A	R	R	A	A	R	R	R	A	A	A	A	A	R	A	R	A	R	A	A	A	R	A
ChrX	7.3	A	R	R	A	A	A	A	A	A	R	R	A	A	A	A	R	A	A	A	R	R	R	A	R	R	A	R	R	A	A	R	R	R	A	A	A	A	A	R	A	R	A	R	A	A	A	R	A
ChrX	7.4	A	R	R	A	A	A	A	A	A	R	R	A	A	A	NA	R	A	A	A	R	R	R	A	R	R	A	R	R	A	A	R	R	R	A	A	A	A	A	R	A	R	NA	R	A	A	A	R	A
ChrX	7.5	A	R	R	A	A	A	A	A	A	R	R	A	A	A	A	R	A	A	A	R	R	R	A	R	R	A	R	R	A	A	R	R	R	A	A	A	A	A	R	A	R	R	R	A	A	A	R	A
ChrX	7.6	A	R	R	NA	A	A	A	A	A	R	R	A	A	A	A	R	A	A	A	R	R	R	A	R	R	A	R	R	A	A	R	R	R	NA	A	A	A	A	R	A	R	R	R	A	A	A	R	A
ChrX	7.7	A	R	R	A	A	A	A	A	A	R	R	A	A	A	A	R	A	A	A	R	R	NA	A	R	R	A	R	R	A	A	R	R	R	A	A	A	A	A	R	A	R	R	R	A	A	A	R	A
ChrX	8.1	A	R	R	A	A	A	NA	A	A	R	R	A	A	NA	NA	R	A	NA	A	R	R	A	A	R	R	A	R	R	A	A	R	R	R	A	A	A	A	A	R	A	R	R	R	A	A	A	R	NA
ChrX	8.2	A	R	R	A	A	A	A	A	A	R	R	A	A	A	A	R	A	A	A	R	R	A	A	R	R	A	R	R	A	A	R	R	R	A	A	A	A	A	R	A	R	R	R	A	A	A	R	A
ChrX	8.3	A	R	R	A	A	A	A	A	A	R	R	A	A	A	A	R	A	A	A	R	R	A	A	R	R	A	R	R	A	A	R	R	R	A	A	A	A	A	R	A	R	R	R	A	A	A	R	A
ChrX	8.4	A	R	R	A	A	A	A	A	A	R	R	A	A	A	A	R	A	A	A	R	R	A	A	R	R	A	R	R	A	A	R	R	R	A	A	A	A	A	R	A	R	R	R	A	A	A	R	A
ChrX	8.5	A	R	R	A	A	A	A	A	A	R	R	A	A	A	A	R	A	A	A	R	R	A	A	R	R	A	R	R	A	A	R	R	R	A	A	A	A	A	R	A	R	R	R	A	A	A	R	A
ChrX	8.6	A	R	R	A	A	A	A	A	A	R	R	A	A	A	A	R	A	A	A	R	R	A	A	R	R	A	R	R	A	A	R	R	R	A	A	A	A	A	R	A	R	R	R	A	A	A	R	A
ChrX	8.7	A	R	R	A	A	A	A	A	A	R	R	A	A	A	NA	R	A	A	A	R	R	A	A	R	R	A	R	R	A	A	R	R	R	A	A	NA	A	A	R	A	R	R	R	A	A	A	R	A
ChrX	8.8	A	R	R	A	A	A	A	A	A	R	R	A	A	A	A	R	A	A	A	R	R	A	A	R	R	A	R	R	A	A	R	R	NA	A	A	A	A	A	R	A	R	R	R	A	A	A	R	A
ChrX	8.9	A	R	R	A	A	A	A	A	A	R	R	A	A	A	A	R	A	A	A	R	R	A	A	R	R	A	R	R	A	A	R	R	R	A	A	A	A	A	R	A	R	R	R	NA	A	A	R	A
ChrX	9	A	R	R	A	A	A	A	A	A	R	NA	A	A	NA	A	R	NA	A	A	R	R	A	A	R	R	A	NA	R	A	A	R	R	R	A	A	A	A	A	R	A	R	R	R	R	A	A	R	A
ChrX	9.1	A	R	R	A	A	A	A	A	A	R	A	A	A	A	A	R	R	A	A	R	R	A	A	R	R	A	R	R	A	A	R	R	R	A	A	A	A	A	R	A	R	R	R	R	A	A	R	A
ChrX	9.2	A	R	R	A	A	A	A	A	A	R	A	A	A	A	A	R	R	A	A	R	R	A	A	R	R	A	R	R	A	A	R	R	R	A	A	A	A	A	R	A	R	R	R	R	A	A	R	A
ChrX	9.3	A	R	R	A	A	A	A	A	A	R	A	A	A	A	A	R	R	A	A	R	R	A	A	R	R	A	R	R	A	A	R	R	R	NA	A	A	A	A	R	A	R	R	R	R	A	A	R	A
ChrX	9.4	NA	R	R	NA	A	A	NA	A	A	R	A	A	A	A	A	R	R	A	A	R	R	A	A	R	R	A	R	R	A	A	R	R	R	A	A	A	A	A	R	A	R	R	R	R	NA	A	R	NA
ChrX	9.5	A	R	R	A	A	A	A	A	A	R	A	A	A	A	A	R	R	A	A	R	R	A	A	R	R	A	R	R	A	A	R	R	R	A	A	A	A	A	R	A	R	R	R	R	A	A	R	A
ChrX	9.6	A	R	R	A	A	A	NA	A	A	R	A	A	A	A	A	R	R	A	A	NA	R	A	A	R	R	A	R	R	A	A	R	R	R	A	A	A	A	A	R	A	R	R	R	R	A	A	R	A
ChrX	9.7	A	R	R	A	A	A	A	A	A	R	A	A	A	A	A	R	R	A	A	R	R	A	A	R	R	A	R	R	A	A	R	R	R	A	A	A	A	A	R	A	R	R	R	R	A	A	R	A
ChrX	9.8	A	R	R	A	A	A	A	A	A	R	A	A	A	A	A	R	R	A	A	R	R	A	A	R	R	A	R	R	A	A	R	R	R	A	A	A	A	A	R	A	R	R	R	R	A	A	R	A
ChrX	9.9	A	R	R	A	A	A	A	NA	A	R	A	A	A	NA	A	R	R	A	A	R	R	A	A	R	R	A	R	R	A	A	R	R	R	A	A	A	A	A	R	A	R	R	R	R	A	A	R	A
ChrX	10	A	R	R	A	A	A	A	A	A	R	A	A	A	A	NA	R	R	A	A	R	R	A	NA	R	R	A	R	R	A	A	R	R	R	A	A	NA	A	A	R	A	R	R	R	R	A	A	R	A
ChrX	10.1	A	R	R	A	A	NA	A	A	A	R	NA	NA	A	A	A	R	R	NA	A	R	R	A	A	R	R	A	R	R	A	A	R	R	R	A	A	A	NA	A	R	NA	R	R	R	R	NA	A	R	A
ChrX	10.2	A	R	R	A	A	A	A	A	A	R	A	A	A	A	A	R	R	A	A	NA	R	A	A	R	R	A	R	R	A	A	R	R	R	A	A	A	A	A	R	A	R	R	R	R	A	A	R	A
ChrX	10.3	A	R	R	A	A	A	A	A	A	R	A	A	A	A	A	R	R	A	A	R	R	A	A	R	R	A	R	R	A	A	R	R	R	A	A	A	A	A	R	A	R	R	R	R	A	A	R	A
ChrX	10.4	A	R	R	A	A	A	A	A	A	R	A	A	A	A	A	R	R	A	A	R	R	A	A	R	R	A	R	R	A	A	R	R	R	A	A	A	A	A	R	A	R	R	R	R	A	A	R	A
ChrX	10.5	A	R	R	A	A	A	A	A	A	R	A	A	A	A	A	R	R	A	A	R	R	A	A	R	R	A	R	R	A	A	R	R	R	A	A	A	A	A	R	A	R	R	R	R	A	A	R	A
ChrX	10.6	A	R	R	A	A	A	A	A	A	R	A	A	A	A	A	R	R	A	A	R	R	A	A	R	R	A	R	R	A	A	R	R	R	A	A	A	A	A	R	A	R	R	R	R	A	NA	R	A
ChrX	10.8	A	R	R	NA	A	A	A	A	A	R	NA	A	NA	NA	A	R	R	A	A	R	R	NA	NA	R	R	NA	R	NA	A	A	R	R	R	A	A	A	A	A	R	A	R	R	R	R	A	NA	R	NA
ChrX	10.9	A	R	R	A	A	A	A	A	A	R	A	A	A	A	NA	R	R	A	A	R	R	A	A	R	R	A	R	R	A	A	R	R	R	A	A	A	A	A	R	A	R	R	R	R	A	A	R	A
ChrX	11	A	R	R	A	A	A	A	A	A	R	A	A	A	NA	A	R	R	A	A	R	R	A	NA	R	R	A	R	R	A	A	R	R	R	A	A	A	A	A	R	A	R	R	R	R	A	A	R	A
ChrX	11.1	A	R	R	NA	A	A	A	A	A	R	A	A	A	NA	NA	R	R	A	A	R	R	A	A	R	R	NA	R	R	A	A	R	R	R	A	A	A	A	A	R	A	R	R	R	R	NA	A	R	A
ChrX	11.2	A	R	R	A	A	A	A	A	A	R	A	A	A	A	A	R	R	A	A	R	R	A	A	R	R	A	R	R	A	A	R	R	R	A	A	A	A	A	R	A	R	R	R	R	A	A	R	A
ChrX	12	A	R	R	A	A	A	A	A	A	R	A	A	A	A	A	R	R	A	A	R	R	A	A	R	R	A	R	R	A	A	R	R	R	A	A	A	A	A	R	A	R	R	R	R	A	A	R	A
ChrX	12.1	A	R	R	A	A	A	A	A	A	R	A	A	A	A	A	R	R	A	A	R	R	A	A	R	R	A	R	R	A	A	R	R	R	A	A	A	A	A	R	A	R	R	R	R	A	A	R	A
ChrX	12.2	A	R	R	A	A	A	A	A	A	R	A	A	A	A	A	R	R	A	A	R	R	A	A	R	R	A	R	R	A	A	R	R	R	A	A	A	A	A	R	A	R	R	R	R	A	A	R	A
ChrX	12.3	A	R	R	A	A	A	A	A	A	R	A	A	A	A	A	R	R	A	A	R	R	A	A	R	R	A	R	R	A	A	R	R	R	A	A	A	A	A	R	A	R	R	R	R	A	A	R	A
ChrX	12.4	A	R	R	A	A	A	NA	A	A	R	A	A	A	A	NA	R	R	A	A	R	R	A	A	R	R	A	R	R	A	A	R	R	R	A	A	A	A	A	R	A	R	R	R	R	A	A	R	A
ChrX	12.6	A	R	R	A	A	A	A	A	A	R	A	A	A	NA	A	R	R	A	A	R	R	A	A	R	R	A	R	R	A	A	R	R	R	A	A	A	A	A	R	A	R	R	R	R	A	A	R	A
ChrX	12.7	A	R	R	A	A	A	A	A	A	R	A	A	A	A	A	R	R	A	A	R	R	A	A	R	R	A	R	R	A	A	R	R	R	A	A	A	A	A	R	A	R	R	R	R	A	A	R	A
ChrX	12.8	A	R	R	A	A	A	A	A	A	R	A	A	A	NA	A	R	R	A	A	R	R	A	A	R	R	A	R	R	A	A	R	R	R	NA	A	A	A	A	R	A	R	R	R	R	A	A	R	A
ChrX	12.9	A	R	R	A	A	A	NA	A	A	R	A	A	A	NA	A	R	R	A	A	R	R	A	A	R	R	A	R	R	A	A	R	R	R	A	A	A	A	A	R	A	R	R	R	R	A	A	R	A
ChrX	13	A	R	R	A	A	A	A	A	A	R	A	A	A	NA	NA	R	R	A	A	R	R	A	A	R	R	A	R	R	A	A	R	R	R	A	A	A	A	A	R	A	R	R	R	R	NA	NA	R	NA
ChrX	13.1	A	R	R	A	A	A	A	A	A	R	A	A	A	A	A	R	R	A	A	R	R	A	NA	R	R	A	R	R	A	A	R	R	R	A	A	NA	A	A	R	A	R	R	R	R	A	A	R	A
ChrX	13.2	A	R	R	A	A	A	A	A	A	R	A	A	A	NA	A	R	R	A	A	R	R	A	A	R	R	A	R	R	A	A	R	R	R	A	A	A	A	A	R	A	R	R	R	R	A	A	R	A
ChrX	13.3	A	R	R	A	A	A	A	A	A	R	A	A	A	A	A	R	R	A	A	R	R	A	A	R	R	A	R	R	A	A	R	R	R	A	A	A	A	A	R	A	R	R	R	R	A	A	R	A
ChrX	13.4	A	R	R	A	A	A	A	A	A	R	A	A	A	A	A	R	R	NA	A	R	R	A	NA	R	R	A	R	R	A	A	R	R	R	NA	A	A	A	A	R	A	R	R	R	R	A	NA	R	A
ChrX	13.5	A	R	R	NA	A	A	A	A	A	R	A	A	NA	NA	NA	R	R	A	A	R	R	NA	A	R	R	A	R	R	A	NA	R	R	R	A	A	NA	NA	A	R	NA	R	R	R	R	A	NA	R	A
ChrX	13.6	A	R	R	A	A	A	A	A	A	R	A	A	A	NA	A	R	R	A	A	R	R	A	A	R	NA	A	R	R	A	A	R	R	R	A	A	A	A	A	R	A	R	R	R	R	A	A	R	NA
ChrX	13.7	NA	R	R	NA	A	NA	NA	A	NA	R	NA	NA	A	A	NA	R	R	A	A	R	R	NA	NA	R	R	A	R	R	A	NA	R	R	R	A	A	NA	NA	A	R	NA	R	R	R	R	A	NA	R	A
ChrX	14.2	A	R	R	A	A	A	A	A	A	R	A	A	A	A	A	R	R	A	A	R	R	A	A	R	R	A	R	R	A	A	R	R	R	A	A	A	A	A	R	A	R	R	R	R	A	A	R	A
ChrX	14.3	A	R	R	A	A	A	A	A	A	R	A	A	A	A	A	R	R	A	A	R	R	A	A	R	R	A	R	R	A	A	R	R	R	A	A	A	A	A	R	A	R	R	R	R	A	A	R	A
ChrX	14.4	A	R	R	A	A	A	A	A	A	R	A	A	A	A	A	R	R	A	A	R	R	A	A	R	R	A	R	R	A	A	R	R	R	A	A	A	A	A	R	A	R	R	R	R	A	A	R	A
ChrX	14.5	A	R	R	A	A	A	A	A	A	R	A	A	A	A	NA	R	R	A	A	R	R	A	A	R	R	A	R	R	A	A	R	R	R	A	A	A	A	A	R	A	R	R	R	R	A	A	R	A
ChrX	14.6	A	R	R	A	A	A	A	A	A	R	A	A	A	A	A	R	R	A	A	R	R	A	A	R	R	A	R	R	A	A	R	R	R	A	A	A	A	A	R	A	R	R	R	R	A	A	R	A
ChrX	14.7	A	R	R	A	A	A	A	A	A	R	A	A	A	A	A	R	R	A	A	R	R	A	A	R	R	A	R	R	A	A	R	R	R	A	A	A	A	A	R	A	R	R	R	R	A	A	R	A
ChrX	14.8	A	R	R	A	A	A	A	A	A	R	A	A	A	A	A	R	R	A	A	R	R	A	A	R	R	A	R	R	A	A	R	R	R	A	A	A	A	A	R	A	R	R	R	R	A	A	R	A
ChrX	14.9	A	R	R	A	A	A	A	A	A	R	A	A	A	A	A	R	R	A	A	R	R	A	A	R	R	A	R	R	A	A	R	R	R	NA	A	A	A	A	R	A	R	R	R	R	A	NA	R	A
ChrX	15	A	R	R	A	A	A	A	A	A	R	A	A	A	A	A	R	R	A	A	R	R	A	A	R	R	A	R	R	A	A	R	R	R	A	A	A	A	A	R	A	R	R	R	R	A	A	R	A
ChrX	15.1	A	R	R	A	A	A	A	A	A	R	A	A	A	A	A	R	R	A	A	R	R	A	A	R	R	A	R	R	A	A	R	R	R	A	A	A	A	A	R	A	R	R	R	R	A	A	R	A
ChrX	15.2	A	R	R	A	A	A	A	A	A	R	A	A	A	A	A	R	R	A	A	R	R	A	A	R	R	A	R	R	A	A	R	R	R	A	A	A	A	A	R	A	R	R	R	R	A	A	R	A
ChrX	15.3	A	R	R	A	A	A	A	A	A	R	A	A	A	A	A	R	R	A	A	R	R	A	A	R	R	A	R	R	A	A	R	R	R	A	A	A	A	A	R	A	R	R	R	R	A	A	R	A
ChrX	15.4	A	R	R	A	A	A	A	A	A	R	A	A	A	NA	NA	R	R	A	A	R	R	A	A	R	R	A	R	R	A	A	R	R	R	A	A	A	A	A	R	A	R	R	R	R	A	A	R	A
[truncated: 44 more columns]

## Sheet: XOgt
chr	MB	f2.001	f2.002	f2.003	f2.004	f2.005	f2.006	f2.007	f2.008	f2.009	f2.010	f2.011	f2.012	f2.013	f2.014	f2.015	f2.016	f2.017	f2.018	f2.019	f2.020	f2.021	f2.022	f2.023	f2.025	f2.026	f2.027	f2.028	f2.029	f2.030	f2.031	f2.032	f2.033	f2.034	f2.035	f2.036	f2.037	f2.038	f2.039	f2.040	f2.041	f2.042	f2.043	f2.044	f2.045	f2.046	f2.047	f2.048	f2.049
ChrI	0	A	W	W	NA	W	W	W	NA	W	A	A	W	W	W	W	W	NA	W	W	NA	W	A	A	A	A	NA	A	W	NA	A	W	W	W	W	A	A	A	W	A	W	W	A	NA	A	A	A	W	A
ChrI	0.1	A	W	W	W	W	W	W	W	W	A	A	W	W	W	W	W	W	W	W	W	W	A	A	A	A	A	A	W	W	A	W	W	W	W	A	A	A	W	A	W	W	A	W	A	A	A	W	A
ChrI	0.2	A	W	W	NA	W	W	W	W	W	A	A	W	W	W	W	W	W	W	W	W	W	A	A	A	A	A	A	W	W	A	W	W	W	W	A	A	A	W	A	W	W	A	W	A	A	A	W	A
ChrI	0.3	A	W	W	W	W	W	W	W	W	A	A	W	W	W	W	W	W	W	W	W	W	A	A	A	NA	A	A	W	W	A	W	W	W	W	A	A	A	W	A	W	W	A	W	A	A	A	W	A
ChrI	0.4	A	W	W	W	W	W	W	W	W	A	A	W	W	W	W	W	NA	W	W	W	W	A	A	A	A	A	A	W	W	A	W	W	W	W	A	A	A	W	A	W	W	A	W	A	A	A	W	A
ChrI	0.5	A	W	W	W	W	W	W	W	W	A	A	W	W	W	W	W	W	W	W	W	W	A	A	A	A	A	A	W	W	A	W	W	W	W	A	A	A	W	A	W	W	A	W	A	A	A	W	A
ChrI	0.6	A	W	W	W	W	W	W	W	W	A	A	W	W	W	W	W	W	W	W	W	W	A	A	A	A	A	A	W	W	A	W	W	W	W	A	A	A	W	A	W	W	A	W	A	A	A	W	A
ChrI	0.7	A	W	W	W	W	W	W	W	W	A	A	NA	W	W	W	W	W	W	W	W	W	A	A	A	A	A	A	W	W	A	W	W	W	W	A	A	A	W	A	W	W	A	W	A	A	A	W	A
ChrI	0.8	A	W	W	W	W	W	W	W	W	A	A	A	W	W	W	W	W	W	W	W	W	A	A	A	A	A	A	W	W	A	W	W	W	W	A	A	A	W	A	W	W	A	W	A	A	A	W	A
ChrI	0.9	A	W	W	W	W	W	W	W	W	A	A	A	W	W	W	W	W	W	W	W	W	A	A	A	A	A	A	W	W	A	W	W	W	W	A	A	A	W	A	W	W	A	W	A	A	A	W	A
ChrI	1	A	W	W	W	W	W	W	W	W	A	A	A	W	W	W	W	W	W	W	W	W	A	A	A	A	A	A	W	W	A	W	W	W	W	A	A	A	W	A	W	W	A	W	A	A	A	W	A
ChrI	1.1	A	W	W	W	W	W	W	W	W	A	A	A	W	W	W	W	W	W	W	W	W	A	A	A	NA	A	A	W	W	A	W	W	W	W	A	A	A	W	A	W	W	A	W	A	A	A	W	A
ChrI	1.3	A	W	A	W	W	W	W	W	W	A	A	A	W	NA	W	W	W	W	W	W	W	A	A	A	A	A	A	W	W	A	W	W	W	W	A	A	A	W	A	W	W	A	W	A	W	A	W	A
ChrI	1.5	A	W	A	W	W	W	W	W	W	A	A	A	W	A	W	W	W	W	W	W	W	A	A	A	A	A	A	W	W	A	W	W	W	W	A	A	A	W	A	W	W	A	W	A	W	A	W	A
ChrI	1.6	A	W	A	W	W	W	W	W	W	A	A	A	W	A	W	W	W	W	W	W	W	A	A	A	A	A	A	W	W	A	W	W	W	W	A	A	A	W	A	W	W	A	W	A	W	A	W	A
ChrI	1.7	A	W	A	NA	W	W	W	W	W	A	A	A	W	A	NA	W	NA	W	W	NA	W	A	A	A	A	A	A	W	W	A	W	W	W	W	A	A	A	W	A	W	W	A	W	A	NA	A	W	A
ChrI	1.8	A	W	A	W	W	W	W	W	W	A	A	A	W	A	W	W	W	W	W	NA	W	A	A	A	A	A	A	NA	W	A	W	W	W	W	A	A	A	W	A	W	W	A	W	A	W	A	W	A
ChrI	1.9	A	W	A	W	W	W	W	W	W	A	A	A	W	A	W	W	W	W	W	W	W	A	A	A	A	A	A	W	W	A	W	W	W	W	A	A	A	W	A	W	W	A	W	A	W	A	W	A
ChrI	2	A	W	A	W	W	W	W	W	W	A	A	A	W	A	W	W	W	W	W	W	W	A	A	A	A	A	A	W	W	A	W	W	W	W	A	A	A	W	A	W	W	A	W	A	W	A	W	A
ChrI	2.1	A	W	A	W	W	W	W	W	W	A	A	A	W	A	W	W	W	W	W	W	W	A	A	A	A	A	A	W	W	A	W	W	W	W	A	A	A	W	A	W	W	A	W	A	W	A	W	A
ChrI	2.2	A	W	A	W	W	W	W	W	W	A	A	A	W	A	W	W	NA	W	W	W	W	A	A	A	A	A	A	W	W	A	W	W	W	NA	A	A	A	W	A	W	W	A	NA	A	W	A	W	A
ChrI	2.3	A	W	A	W	W	W	W	W	W	A	A	A	W	A	W	W	W	W	W	NA	W	A	A	A	A	A	A	W	W	A	W	W	W	W	A	A	A	W	A	W	W	A	A	A	W	A	W	A
ChrI	2.4	A	W	A	W	W	W	W	W	W	A	A	A	W	A	W	W	W	W	W	W	NA	A	A	A	A	A	A	W	W	A	W	W	W	W	A	A	A	W	A	W	W	A	A	A	W	A	W	A
ChrI	2.5	A	W	A	W	W	W	W	W	W	A	A	A	W	A	W	W	W	W	W	W	W	A	A	A	A	A	A	W	W	A	W	W	W	W	A	A	A	W	A	W	W	A	A	A	W	A	W	A
ChrI	2.6	A	W	A	W	W	W	W	W	W	NA	A	NA	W	NA	W	W	W	W	W	W	W	A	A	A	A	A	NA	W	NA	A	W	W	W	W	A	A	NA	W	NA	W	W	A	A	A	W	A	W	A
ChrI	2.7	A	W	A	W	W	W	W	W	W	A	A	A	W	A	W	W	NA	W	W	W	W	A	A	A	A	A	A	W	W	A	W	W	W	W	A	A	A	W	A	W	W	A	A	A	W	A	W	A
ChrI	2.8	A	W	A	W	W	W	W	W	W	A	A	A	W	A	NA	NA	A	W	W	W	W	A	A	A	A	A	A	W	W	A	W	W	W	W	A	A	A	W	A	W	NA	A	A	A	W	A	W	A
ChrI	2.9	A	W	A	W	W	W	W	W	W	A	A	A	W	A	A	W	A	W	W	A	W	A	A	A	A	A	A	W	W	A	W	W	W	W	A	A	A	W	A	W	A	A	A	A	W	A	W	A
ChrI	3	A	W	A	W	W	W	W	W	W	A	A	A	W	A	A	W	A	W	W	A	W	A	A	A	A	A	A	W	W	A	W	W	W	W	A	A	A	W	A	W	A	A	A	A	W	A	W	A
ChrI	3.1	A	W	A	W	W	W	W	W	W	A	A	NA	W	A	A	W	A	W	W	A	W	A	A	A	A	A	A	W	W	A	W	W	W	W	A	A	A	W	A	W	A	A	A	A	W	A	W	A
ChrI	3.2	A	W	A	W	W	W	W	W	W	A	A	A	W	NA	A	W	NA	W	W	A	W	A	A	A	A	A	A	W	W	A	W	W	W	W	A	A	A	W	A	W	A	A	A	A	W	A	W	A
ChrI	3.3	A	W	A	W	W	W	W	W	NA	A	A	A	W	A	NA	W	NA	W	W	A	W	A	A	A	A	A	A	W	W	A	W	W	W	W	A	A	NA	W	A	W	A	A	A	A	W	A	W	A
ChrI	3.4	A	W	A	W	W	W	W	W	A	A	A	A	W	A	A	W	A	W	W	A	W	A	A	A	A	A	A	W	W	A	W	W	W	W	A	A	W	W	A	W	A	A	A	A	W	A	W	A
ChrI	3.5	A	W	A	W	W	W	W	W	A	A	A	A	W	A	A	W	A	W	W	A	W	A	A	A	A	A	A	W	W	A	W	W	W	W	A	A	W	W	A	W	A	A	A	A	W	A	W	A
ChrI	3.6	A	W	A	W	W	NA	W	W	A	A	A	A	W	A	A	W	A	W	W	A	W	A	A	A	NA	A	A	W	W	A	W	W	W	W	A	A	W	W	A	W	A	A	NA	A	W	A	W	A
ChrI	3.7	A	W	A	W	W	A	W	W	A	A	A	A	W	A	A	W	A	W	W	A	W	A	A	A	A	A	A	W	W	A	W	W	W	W	A	A	W	W	A	W	A	A	A	A	W	A	W	A
ChrI	3.8	A	W	A	W	W	A	W	W	A	A	A	A	W	A	A	W	A	W	W	A	W	A	A	A	A	A	A	W	W	A	W	W	W	W	A	A	W	W	A	W	A	A	A	A	W	A	W	A
ChrI	3.9	A	W	A	W	W	A	W	W	A	A	A	A	W	A	A	W	A	W	W	A	W	A	A	A	A	A	A	W	W	A	W	W	W	W	A	A	W	W	A	W	A	A	A	A	W	A	W	A
ChrI	4	A	W	A	NA	W	A	NA	NA	A	A	A	A	W	A	NA	W	A	W	W	A	W	A	A	A	A	A	A	W	W	A	NA	NA	W	W	A	A	W	NA	A	W	A	A	A	A	NA	A	W	A
ChrI	4.1	A	W	A	W	W	A	W	W	A	A	A	A	W	A	A	W	A	W	W	A	W	A	A	A	A	A	A	W	W	A	W	A	W	W	A	A	W	W	A	W	A	A	A	A	W	A	W	A
ChrI	4.2	A	W	A	W	W	NA	W	W	A	A	A	A	W	A	A	W	A	W	W	A	NA	A	A	A	A	A	A	W	W	A	W	A	W	W	A	A	W	W	A	W	A	A	A	A	W	A	W	A
ChrI	4.3	A	W	A	W	W	A	W	W	A	A	A	A	W	A	A	W	A	W	W	A	W	A	A	A	A	A	A	W	W	A	W	A	W	NA	A	A	W	W	A	W	A	A	A	A	W	A	W	A
ChrI	4.4	A	W	A	W	W	A	W	W	A	A	A	A	W	A	A	W	A	W	W	A	W	A	A	A	A	A	A	W	W	A	W	A	W	W	A	A	W	W	A	W	A	A	A	A	W	A	W	A
ChrI	4.5	A	W	A	NA	W	A	W	W	A	A	A	A	W	A	A	W	A	W	W	NA	W	A	A	A	A	A	A	W	W	A	W	A	W	W	A	A	W	W	A	W	A	A	A	A	W	A	W	A
ChrI	4.6	A	W	A	W	W	A	W	W	A	A	A	A	W	A	A	W	A	W	W	A	W	A	NA	A	A	A	A	W	W	A	W	A	W	W	A	A	W	W	A	W	A	A	A	A	W	A	W	A
ChrI	4.7	A	W	A	W	W	A	W	W	A	A	A	A	W	A	A	W	A	W	W	A	W	A	A	A	A	A	A	NA	W	A	W	A	W	W	A	A	W	W	A	W	A	A	A	A	W	A	W	A
ChrI	4.8	A	W	A	NA	W	A	W	W	A	A	A	A	W	A	A	W	A	W	W	A	W	A	NA	A	A	A	A	NA	W	A	W	A	W	NA	A	A	W	W	A	W	A	W	A	A	W	A	W	A
ChrI	4.9	A	W	A	W	W	A	W	W	A	A	A	A	W	A	A	W	A	W	W	A	W	A	A	A	A	A	A	W	W	A	W	A	W	W	A	A	W	W	A	W	A	W	A	A	W	A	W	A
ChrI	5	A	W	A	W	W	A	W	W	A	A	A	A	W	A	A	W	A	W	W	A	W	A	A	A	A	A	A	W	W	A	W	A	W	W	A	A	W	W	A	W	A	W	A	A	W	A	W	A
ChrI	5.1	A	W	A	W	W	A	W	W	A	A	A	A	W	A	A	W	A	W	W	A	W	A	NA	A	A	A	A	W	W	A	W	A	W	W	A	A	W	W	A	W	A	W	A	A	W	A	W	A
ChrI	5.2	A	W	A	W	W	A	W	W	A	A	A	A	W	A	A	W	A	W	W	A	W	A	W	A	A	A	A	W	W	A	W	A	W	W	A	A	W	W	A	W	A	W	A	A	W	A	W	A
ChrI	5.3	A	W	A	W	W	A	W	W	A	A	A	A	W	A	A	W	A	W	W	A	W	A	NA	A	A	A	A	W	W	A	W	A	W	W	A	A	W	W	A	W	A	W	A	A	W	A	W	A
ChrI	5.4	A	W	A	W	W	A	W	W	A	A	A	A	W	A	A	W	A	W	W	A	W	A	W	A	A	A	A	W	W	A	W	A	W	W	A	A	W	W	A	W	A	W	A	A	W	A	W	A
ChrI	5.5	A	W	A	W	W	A	W	W	A	A	A	A	W	A	A	W	A	W	W	A	W	A	W	A	A	A	A	W	W	A	W	A	W	W	A	A	W	W	A	W	A	W	A	A	W	A	W	A
ChrI	5.6	A	W	A	W	W	A	W	W	A	A	A	A	W	A	A	W	A	W	W	NA	W	A	W	A	A	A	A	W	W	A	W	A	W	W	A	A	W	W	A	W	A	W	A	A	NA	A	W	A
ChrI	5.7	A	W	A	W	W	A	W	W	A	A	A	A	W	A	A	W	A	W	W	NA	W	A	W	A	A	A	A	W	W	A	W	A	W	W	A	A	W	W	A	W	A	W	A	A	W	A	W	A
ChrI	5.8	A	W	A	W	W	A	W	W	A	A	A	A	W	A	A	W	A	W	W	A	W	A	W	A	A	A	A	W	W	A	W	A	W	W	A	A	W	W	A	W	A	W	A	A	W	A	W	A
ChrI	5.9	A	W	A	W	W	A	W	W	A	A	A	A	W	A	A	W	A	W	W	NA	W	A	NA	A	A	A	A	NA	W	A	W	A	W	NA	A	A	W	W	A	W	A	W	A	A	W	A	W	A
ChrI	6	A	W	A	W	W	A	W	W	A	A	A	A	W	A	A	W	A	W	W	A	W	A	W	A	A	A	A	W	W	A	W	A	W	NA	A	A	W	W	A	W	A	W	A	A	W	A	W	A
ChrI	6.1	A	W	A	W	W	A	W	W	A	A	A	A	W	A	A	W	A	W	W	A	W	A	W	A	A	A	A	W	W	A	W	A	W	NA	A	A	W	W	A	W	A	W	A	A	W	A	W	A
ChrI	6.2	A	W	A	W	W	A	W	NA	A	A	A	A	W	A	A	W	A	W	W	A	W	A	W	A	A	A	A	NA	W	A	W	A	W	W	A	A	W	W	A	W	A	W	A	A	W	A	W	A
ChrI	6.3	A	W	A	W	W	A	W	W	A	A	A	A	W	A	A	W	A	W	W	A	W	A	W	A	A	A	A	W	W	A	W	A	W	NA	A	A	W	W	A	W	A	W	A	A	W	A	W	A
ChrI	6.4	A	W	A	W	W	A	W	W	A	A	A	A	W	A	A	W	A	W	W	A	W	A	W	A	A	A	A	NA	W	A	W	A	W	W	A	A	W	W	A	W	A	W	A	A	W	A	W	A
ChrI	6.5	A	W	A	W	W	A	W	W	NA	A	NA	A	W	A	A	W	NA	W	W	NA	W	A	W	A	NA	NA	NA	W	W	A	W	A	W	W	A	A	W	W	A	W	A	W	A	A	W	NA	W	A
ChrI	6.7	A	W	A	W	W	A	W	W	A	A	A	A	W	A	A	W	A	W	W	A	W	A	W	A	A	A	A	W	W	A	W	A	W	W	A	A	W	W	A	W	A	W	A	A	W	A	W	A
ChrI	6.8	A	W	A	W	W	A	W	W	A	A	A	A	W	A	A	W	A	W	W	A	W	A	W	A	A	A	A	W	W	A	W	A	W	NA	A	A	W	W	A	W	A	W	A	A	W	A	W	A
ChrI	6.9	A	W	A	W	W	A	W	W	A	A	A	A	W	A	A	W	A	W	W	A	W	A	W	A	A	A	A	W	W	A	W	A	W	W	A	A	W	W	A	W	A	NA	A	A	W	A	W	A
ChrI	7	A	W	A	W	W	A	W	NA	A	A	A	A	W	A	NA	W	NA	W	W	A	W	A	W	A	A	A	A	NA	W	A	NA	A	W	NA	NA	A	W	NA	A	W	A	W	A	A	W	A	W	A
ChrI	7.1	A	W	A	W	W	A	W	NA	A	A	A	A	W	A	A	W	A	W	W	A	W	A	W	A	A	A	A	W	W	A	NA	A	W	NA	A	A	W	W	A	W	A	W	A	A	W	A	W	A
ChrI	7.2	A	W	A	W	W	A	W	W	A	A	A	A	W	A	A	W	A	W	W	A	W	A	NA	A	A	A	A	W	W	A	W	A	W	NA	A	A	W	W	A	W	A	W	A	A	W	A	W	A
ChrI	7.3	A	W	A	W	W	A	W	W	A	A	A	A	W	A	A	W	A	W	W	A	W	A	W	A	A	A	A	W	W	A	W	A	W	NA	A	A	W	W	A	W	A	W	A	A	W	A	W	A
ChrI	7.4	A	W	A	W	W	A	W	W	A	A	A	A	W	A	NA	W	A	W	W	A	W	A	W	A	A	A	A	W	W	A	W	A	W	W	A	A	W	W	A	W	A	W	A	A	W	A	W	A
ChrI	7.5	A	W	A	W	W	A	W	W	A	A	A	A	W	A	A	W	A	W	W	A	W	A	W	A	A	A	A	NA	W	A	W	A	W	W	A	A	W	W	A	W	A	W	A	A	W	A	W	A
ChrI	7.6	A	W	A	W	W	A	W	W	A	A	A	A	W	A	A	W	NA	W	W	A	W	A	W	A	A	A	A	W	W	A	W	NA	W	W	A	A	W	W	A	W	NA	W	A	A	W	A	W	A
ChrI	7.7	A	W	A	W	W	A	W	W	A	A	A	A	W	A	A	W	A	W	W	A	W	A	W	A	A	A	A	W	W	A	W	A	W	W	A	A	W	W	A	W	A	W	A	A	W	A	W	A
ChrI	7.8	A	W	A	W	W	A	W	W	A	A	A	A	W	A	A	W	A	W	W	A	W	A	W	A	A	A	A	NA	W	A	W	A	W	NA	A	A	W	W	A	W	A	W	A	A	W	A	W	A
ChrI	7.9	A	W	A	W	W	A	W	W	A	A	A	A	W	A	A	W	A	W	W	A	W	A	W	A	A	A	A	NA	W	A	W	A	W	NA	A	A	W	W	A	W	A	W	A	A	W	A	W	A
ChrI	8	A	W	A	W	W	A	W	W	A	A	A	A	W	A	A	W	A	W	W	A	W	A	W	A	A	A	A	W	W	A	W	A	W	NA	A	A	W	W	A	W	A	W	A	A	W	A	W	A
ChrI	8.1	A	W	A	W	W	A	W	W	A	A	A	A	W	A	A	W	A	W	W	A	W	A	NA	A	A	A	A	W	W	A	W	A	W	NA	A	A	W	W	A	W	A	W	A	A	W	A	W	A
ChrI	8.2	A	W	A	W	W	A	W	NA	A	A	A	A	W	A	A	W	A	W	W	A	W	A	W	A	A	A	A	W	W	A	W	A	W	W	A	A	W	W	A	W	A	W	A	A	W	A	W	A
ChrI	8.3	A	W	A	W	W	A	W	W	A	A	A	A	W	A	A	W	A	W	W	A	W	A	W	A	A	A	A	W	W	A	W	A	W	W	A	A	W	W	A	W	A	W	A	A	W	A	W	A
ChrI	8.4	A	W	A	W	W	A	W	W	A	A	A	A	W	A	A	W	A	W	W	A	W	A	W	A	A	A	A	W	W	A	W	A	W	W	A	A	W	W	A	W	A	W	A	A	W	A	W	A
ChrI	8.6	A	W	A	W	W	A	W	W	A	A	A	A	W	A	A	W	A	W	W	A	W	A	W	A	A	A	A	W	W	A	W	A	W	W	A	A	W	W	A	W	A	W	A	A	W	A	W	A
ChrI	8.7	A	W	A	W	W	A	NA	W	A	A	A	A	W	A	A	W	A	W	W	A	W	A	W	A	A	A	A	NA	W	A	NA	A	W	W	A	A	W	W	A	W	A	W	A	A	W	A	W	A
ChrI	8.8	A	W	A	W	W	A	A	W	A	A	A	A	W	A	A	W	A	W	W	A	W	A	W	A	A	A	A	NA	W	A	W	A	W	W	A	A	W	W	A	W	A	W	A	A	W	A	W	A
ChrI	8.9	A	W	A	W	W	A	A	W	A	A	A	A	W	A	A	W	A	W	W	A	W	A	W	A	A	A	A	NA	W	A	NA	A	W	NA	A	A	W	NA	A	W	A	W	A	A	W	A	W	A
ChrI	9	A	W	A	W	W	A	A	W	A	A	A	A	W	A	A	W	A	W	W	A	W	A	W	A	A	A	A	W	W	A	W	A	W	W	A	A	W	W	A	W	A	W	A	A	W	A	W	A
ChrI	9.1	A	W	A	W	W	A	A	W	A	A	A	A	W	A	A	W	A	W	W	A	W	A	NA	A	A	A	A	W	W	A	W	A	W	W	A	A	W	W	A	W	A	W	A	A	W	A	W	A
ChrI	9.2	A	NA	A	W	W	A	A	W	A	A	A	A	W	A	A	W	A	W	W	A	W	A	W	A	A	A	A	W	W	A	W	A	W	NA	A	A	W	W	A	W	A	W	A	A	W	A	W	A
ChrI	9.3	A	A	A	W	W	A	A	W	A	A	A	A	W	A	A	W	A	W	W	A	W	A	W	A	A	A	A	W	W	A	W	A	W	W	A	A	W	W	A	W	A	W	A	A	W	A	W	A
ChrI	9.4	A	A	A	W	W	A	A	W	A	A	A	A	W	A	A	W	A	W	W	NA	W	A	W	A	A	A	A	W	W	A	W	A	W	W	A	A	W	W	A	W	A	W	A	A	W	A	W	A
ChrI	9.5	A	A	A	W	W	A	A	W	A	A	A	A	W	NA	A	W	A	W	W	A	W	A	W	A	A	A	A	W	W	A	W	A	W	NA	A	A	W	W	A	W	A	W	A	A	W	A	W	A
ChrI	9.6	A	A	A	W	W	A	A	W	A	A	A	A	W	A	A	W	A	W	W	A	W	A	W	A	A	A	A	NA	W	A	W	A	W	W	A	A	W	W	A	W	A	W	A	A	W	A	W	A
ChrI	9.7	A	A	A	W	W	A	A	W	A	A	A	A	W	A	A	W	A	W	W	A	W	A	W	A	A	A	A	W	W	A	W	A	W	W	A	A	W	W	A	W	A	W	A	A	W	A	W	A
ChrI	9.8	A	A	A	W	W	A	A	W	A	A	A	A	W	A	A	W	A	W	W	A	W	A	W	A	A	A	A	W	W	A	W	A	W	W	A	A	W	W	A	W	A	W	A	A	W	A	W	A
ChrI	9.9	A	A	A	W	W	A	A	W	A	A	A	A	W	NA	A	W	A	W	W	A	W	A	W	A	A	A	A	W	W	A	W	A	W	NA	A	A	W	W	A	W	A	W	A	A	W	A	W	A
ChrI	10	A	A	A	W	W	A	A	W	A	A	A	A	W	A	A	W	A	W	W	A	W	A	W	A	A	A	A	W	W	A	W	A	W	W	A	A	W	W	A	W	A	W	A	A	W	A	W	A
ChrI	10.1	A	A	A	W	W	A	A	W	A	A	A	A	W	A	A	W	A	W	W	A	W	A	W	A	A	A	A	W	W	A	W	A	W	W	A	A	W	W	A	W	A	W	A	A	W	A	W	A
ChrI	10.2	A	A	A	W	W	A	A	W	A	A	A	A	W	A	NA	W	A	W	W	A	W	A	W	A	A	A	A	W	W	A	W	A	W	W	A	A	W	W	A	W	A	W	A	A	W	A	W	A
ChrI	10.3	A	A	A	W	W	A	A	W	A	A	A	A	W	A	NA	W	A	W	W	NA	W	A	W	A	NA	A	A	W	W	A	W	A	W	W	NA	A	W	W	A	W	A	W	A	A	W	A	W	A
ChrI	10.4	A	A	A	W	W	A	A	W	A	A	A	A	W	A	A	W	A	W	W	A	W	A	NA	A	A	A	A	W	W	A	W	A	W	W	A	A	W	W	A	W	A	W	A	A	W	A	W	A
ChrI	10.5	A	A	A	W	W	A	A	W	A	A	A	A	W	A	A	W	A	W	W	A	W	A	W	A	A	A	A	W	W	A	W	A	W	NA	A	A	W	W	A	W	A	W	A	A	W	A	W	A
ChrI	10.6	A	A	A	W	W	A	A	W	A	A	A	A	W	A	A	W	A	W	W	A	W	A	W	A	A	A	A	W	W	A	W	A	W	NA	A	A	W	W	A	W	A	W	A	A	W	A	W	A
ChrI	10.7	A	A	A	W	W	A	A	W	A	A	A	A	W	A	A	W	A	W	W	A	W	A	W	A	A	A	A	W	W	A	W	A	W	W	A	A	W	W	A	W	A	W	A	A	W	A	W	A
ChrI	10.8	A	A	A	W	W	A	A	W	A	A	A	A	W	A	A	W	A	W	W	A	W	A	W	A	A	A	A	W	W	A	W	A	W	W	A	A	W	W	A	W	A	W	A	A	W	A	W	A
ChrI	10.9	A	A	A	W	W	A	A	W	A	A	A	A	W	A	A	W	A	W	W	A	W	A	W	A	A	A	A	W	W	A	W	A	W	W	A	A	W	W	A	W	A	W	A	A	W	A	W	A
ChrI	11	A	A	A	W	W	A	A	W	A	A	A	A	W	A	A	W	A	W	W	A	W	A	NA	A	A	A	A	NA	W	A	W	A	W	NA	A	A	W	W	NA	W	A	W	A	A	W	A	W	A
ChrI	11.1	A	A	A	W	W	A	A	W	A	A	A	A	W	A	A	W	A	W	W	A	W	A	W	A	A	A	A	NA	W	A	W	A	W	NA	A	A	W	W	A	W	A	W	A	A	W	A	W	A
ChrI	11.2	A	A	A	W	W	A	A	W	A	A	A	A	W	A	A	W	A	W	W	A	W	A	NA	A	A	A	A	W	W	A	W	A	W	NA	A	A	W	W	A	W	A	W	A	A	W	A	W	A
ChrI	11.3	A	A	A	W	W	A	A	W	A	A	A	A	W	A	A	W	A	W	W	A	W	A	W	A	A	A	A	NA	W	A	W	A	W	W	A	A	W	W	A	W	A	W	A	A	W	A	W	A
ChrI	11.4	A	A	A	W	W	A	A	W	A	A	A	A	W	A	A	W	A	W	W	A	W	A	W	A	A	A	A	W	W	A	W	A	W	NA	A	A	W	W	A	W	A	W	A	A	W	A	W	A
ChrI	11.5	A	A	A	W	W	A	A	W	A	A	A	A	W	A	A	W	A	W	W	A	W	A	W	A	A	A	A	NA	W	A	W	A	W	NA	A	A	W	W	A	W	A	W	A	A	W	A	W	A
ChrI	11.6	A	A	A	W	W	A	A	W	A	A	A	A	W	A	A	W	A	W	W	NA	W	A	W	A	A	A	A	W	W	A	W	A	W	W	A	A	W	W	A	W	A	W	A	A	W	A	W	A
ChrI	11.7	A	A	A	W	W	A	A	W	A	A	A	A	W	A	A	W	A	W	W	A	W	A	W	A	A	A	A	NA	W	A	W	A	W	W	A	A	W	W	A	W	A	W	A	A	W	A	W	A
ChrI	11.8	A	A	A	W	W	A	A	W	A	A	A	A	W	A	A	W	A	W	W	A	W	A	NA	A	A	A	A	W	W	A	W	A	W	W	A	A	W	W	A	W	A	W	A	A	W	A	W	A
ChrI	11.9	A	A	A	W	W	A	A	W	A	A	A	A	W	A	A	W	A	W	W	A	W	A	W	A	A	A	A	W	W	A	W	A	W	NA	A	A	W	W	A	W	A	W	A	A	W	A	W	A
ChrI	12	A	A	A	W	W	A	A	W	A	A	A	A	W	A	A	W	A	W	W	A	W	A	NA	A	A	A	A	NA	W	A	W	A	W	W	A	A	W	W	A	W	A	W	A	A	W	A	W	A
ChrI	12.1	A	A	A	W	W	A	A	W	A	A	A	A	W	A	A	W	A	W	W	A	W	A	W	A	A	A	A	W	W	A	W	A	W	NA	A	A	W	W	A	W	A	W	A	A	W	A	W	A
ChrI	12.2	A	A	A	W	W	A	A	W	A	A	A	A	W	A	A	W	A	W	W	A	W	A	W	A	A	A	A	W	W	A	W	A	W	NA	A	A	W	W	A	W	A	W	A	A	W	A	W	A
ChrI	12.3	A	A	A	W	W	A	A	W	A	A	A	A	W	A	A	W	A	W	W	A	W	A	W	A	A	A	A	W	W	A	W	A	W	W	A	A	W	W	A	W	A	W	A	A	W	A	W	A
ChrI	12.4	A	A	A	W	W	A	A	W	A	A	A	A	W	A	A	W	A	W	W	A	W	A	W	A	A	A	A	W	W	A	W	A	W	W	A	A	W	W	A	W	A	W	A	A	W	A	W	A
ChrI	12.5	A	A	A	W	W	A	A	W	A	A	A	A	W	A	A	W	A	W	W	A	W	A	W	A	A	A	A	W	W	A	W	A	W	W	A	A	W	W	A	W	A	W	A	A	W	A	W	A
ChrI	12.6	A	A	A	W	W	A	A	W	A	A	A	A	W	A	A	W	A	W	W	A	W	A	W	A	A	A	A	W	W	A	W	A	W	W	A	A	W	W	A	W	A	W	A	A	W	A	W	A
ChrI	12.7	A	A	A	W	W	A	A	W	A	A	A	A	W	A	A	W	A	W	W	A	W	A	W	A	A	A	A	W	W	A	W	A	W	W	A	A	W	W	A	W	A	W	A	A	W	A	W	A
ChrI	12.8	A	A	A	W	W	A	A	W	A	A	A	A	W	A	A	W	A	W	W	A	W	A	W	A	A	A	A	W	W	A	W	A	W	NA	A	A	W	W	A	W	A	W	A	A	W	A	W	A
ChrI	12.9	A	A	A	W	W	A	A	W	A	A	A	A	W	A	A	W	A	W	W	A	W	A	W	A	A	A	A	W	W	A	W	A	W	W	A	A	W	W	A	W	A	W	A	A	W	A	W	A
ChrI	13	A	A	A	W	W	A	A	W	A	A	A	A	W	A	A	W	A	W	W	A	W	A	W	A	A	A	A	W	W	A	W	A	W	W	A	A	W	W	A	W	A	W	A	A	W	A	W	A
ChrI	13.1	A	A	A	W	W	A	A	W	A	A	A	A	W	A	A	W	A	W	W	A	W	A	W	A	A	A	A	W	W	A	W	A	W	NA	A	A	W	W	A	W	A	W	A	A	W	A	W	A
ChrI	13.2	A	A	A	W	W	A	A	W	A	A	A	A	W	A	A	W	A	W	W	A	W	A	W	A	A	A	A	W	W	A	W	A	W	W	A	A	W	W	A	W	A	W	A	A	W	A	W	A
ChrI	13.3	A	A	A	W	W	A	A	W	A	A	A	A	W	A	A	W	A	W	W	A	W	A	W	A	A	A	A	W	W	A	W	A	W	W	A	A	W	W	A	W	A	W	A	A	W	A	W	A
ChrI	13.4	A	A	A	W	W	A	A	W	A	A	A	A	W	A	A	W	A	W	W	A	W	A	NA	A	A	A	A	W	W	A	W	A	W	W	A	A	W	W	A	W	A	W	A	A	W	A	W	A
ChrI	13.5	A	A	A	W	W	A	A	W	A	A	A	A	W	A	A	W	A	W	W	A	W	A	W	A	A	A	A	NA	W	A	W	A	W	NA	A	A	W	W	A	W	A	W	A	A	W	A	W	A
ChrI	13.6	A	A	A	W	W	A	A	W	A	A	A	A	W	A	A	W	A	W	W	A	W	A	W	A	A	A	A	W	W	A	W	A	W	NA	A	A	W	W	A	W	A	W	A	A	W	A	W	A
ChrI	13.7	A	A	A	W	W	A	A	W	A	A	A	A	W	A	A	W	A	W	W	A	W	A	W	A	A	A	A	W	W	A	W	A	W	NA	A	A	W	W	A	W	A	W	A	A	W	A	W	A
ChrI	13.8	A	A	A	W	W	A	A	W	A	A	A	A	W	A	A	W	A	W	W	A	W	A	W	A	A	A	A	W	W	A	W	A	W	W	A	A	W	W	A	W	A	W	A	A	W	A	W	A
ChrI	13.9	A	A	A	W	W	A	A	W	A	A	A	A	W	A	A	W	A	W	W	A	W	A	W	A	A	A	A	NA	W	A	W	A	W	NA	A	A	W	W	A	W	A	W	A	A	W	A	W	A
ChrI	14	A	A	A	W	W	A	A	W	A	A	A	A	W	A	A	W	A	W	W	A	W	A	W	A	A	A	A	W	W	A	W	A	W	W	A	A	W	W	A	W	A	W	A	A	W	A	W	A
ChrI	14.1	A	A	A	W	W	A	A	W	A	A	A	A	W	A	A	W	A	W	W	A	W	A	W	A	A	A	A	W	W	A	W	A	W	W	A	A	W	W	A	W	A	W	A	A	W	A	W	A
ChrI	14.2	NA	A	A	W	W	A	A	W	A	NA	A	A	W	A	A	W	A	W	W	A	W	NA	W	A	A	A	A	NA	W	A	W	A	W	NA	A	NA	W	W	A	W	A	W	NA	A	W	NA	W	A
ChrI	14.3	A	A	A	W	W	A	A	W	A	A	A	A	W	A	A	W	A	W	W	A	W	A	W	A	A	A	A	W	W	A	W	A	W	W	A	A	W	W	A	W	A	W	A	A	W	A	W	A
ChrI	14.4	NA	A	A	W	W	A	A	W	A	A	A	A	W	A	A	W	A	W	W	A	W	A	NA	A	A	A	A	NA	W	A	NA	A	W	NA	A	A	W	NA	A	W	A	W	A	A	W	A	W	A
ChrI	14.5	A	A	A	W	W	A	A	W	A	A	A	A	W	A	A	W	A	W	W	A	W	A	W	A	A	A	A	W	W	A	W	A	W	W	A	A	W	W	A	W	A	W	A	A	W	A	W	A
ChrI	14.6	A	A	A	W	W	A	A	W	A	A	A	A	W	A	A	W	A	W	W	A	W	A	W	A	A	A	A	W	W	A	W	A	W	W	A	A	W	W	A	W	A	W	A	A	W	A	W	A
ChrI	14.7	A	A	A	W	W	A	A	W	A	A	A	A	W	A	A	W	A	W	W	A	W	A	NA	A	A	A	A	NA	W	A	W	A	W	NA	A	A	W	W	A	W	A	W	A	A	W	A	W	A
ChrI	14.8	A	A	A	W	W	A	A	W	A	A	A	A	W	A	A	W	A	W	W	A	W	A	W	A	A	A	A	W	W	A	W	A	W	NA	A	A	W	W	A	W	A	W	A	A	W	A	W	A
ChrI	14.9	A	A	A	W	W	A	A	W	A	A	A	A	W	A	A	W	A	W	W	A	W	A	W	A	A	A	A	NA	W	A	W	A	W	W	A	A	W	W	A	W	A	W	A	A	W	A	W	A
ChrI	15	A	A	A	W	W	A	A	W	A	A	A	A	W	A	A	W	A	W	W	A	W	A	W	A	A	A	A	W	W	A	W	A	W	W	A	A	W	W	A	W	A	W	A	A	W	A	W	A
ChrI	15.1	A	A	A	W	W	A	A	W	A	A	A	A	W	A	A	W	A	W	W	A	W	A	W	A	A	A	A	W	W	A	W	A	W	W	A	A	W	W	A	W	A	W	A	A	W	A	W	A
ChrI	15.2	A	A	A	W	W	A	A	W	A	A	A	A	W	A	A	W	A	W	W	A	W	A	W	A	A	A	A	W	W	A	W	A	W	W	A	A	W	W	A	W	A	W	A	A	W	A	W	A
ChrI	15.3	A	A	A	W	W	A	A	W	A	A	A	A	W	A	A	W	A	W	W	A	W	A	W	A	A	A	A	W	W	A	W	A	W	W	A	A	W	W	A	W	A	W	A	A	W	A	W	A
ChrI	15.4	A	A	A	W	W	A	A	W	A	A	A	A	W	A	A	W	A	W	W	A	W	A	W	A	A	A	A	NA	W	A	W	A	W	W	A	A	W	W	A	W	A	W	A	A	W	A	W	A
ChrI	15.5	A	A	A	W	W	A	A	W	A	A	A	A	W	A	A	W	A	W	W	A	W	A	W	A	A	A	A	W	W	A	W	A	W	W	A	A	W	W	A	W	A	W	A	A	W	A	W	A
ChrI	15.6	A	A	A	W	W	A	A	W	A	A	A	A	W	A	A	W	A	W	W	A	W	A	W	A	A	A	A	W	W	A	W	A	W	W	A	A	W	W	A	W	A	W	A	A	W	A	W	A
ChrI	15.7	A	A	A	W	W	A	A	W	A	A	A	A	W	A	A	W	A	W	W	A	W	A	W	A	A	A	A	W	W	A	W	A	W	W	A	A	W	W	A	W	A	W	A	A	W	A	W	A
ChrI	15.9	A	A	A	W	W	A	A	W	A	A	A	A	W	A	A	W	A	W	W	A	W	A	NA	A	A	A	NA	NA	W	A	W	A	W	W	A	A	W	W	A	W	A	W	A	A	W	A	W	A
ChrI	16	A	A	A	W	W	A	A	W	A	A	A	A	W	A	A	W	A	W	W	A	W	A	W	A	A	A	A	W	W	A	W	A	W	W	A	A	W	NA	A	W	A	W	A	A	W	A	W	A
ChrI	16.1	A	A	A	W	W	A	A	W	A	A	A	A	W	A	NA	W	A	W	W	A	W	A	W	A	A	A	A	W	W	A	W	A	W	W	A	A	W	W	A	W	A	W	A	A	W	A	W	A
ChrI	16.2	A	A	A	W	W	A	A	W	A	A	NA	NA	W	A	A	W	NA	W	W	A	W	A	W	NA	A	A	NA	W	W	A	W	A	W	W	A	A	W	W	A	W	A	W	A	A	W	NA	W	A
ChrI	16.3	A	A	A	W	W	A	A	W	A	A	A	A	W	A	NA	W	A	W	W	A	W	A	W	A	A	A	A	W	W	A	W	A	W	W	A	A	W	W	A	W	A	W	A	A	W	A	W	A
ChrI	16.4	A	A	A	W	W	NA	A	W	A	A	A	NA	W	NA	A	W	A	W	W	NA	W	A	W	A	A	NA	A	W	W	A	W	A	W	W	A	NA	W	W	A	W	NA	W	NA	A	W	A	W	NA
ChrI	16.5	A	A	A	W	W	A	A	W	A	A	A	A	W	A	A	W	A	W	W	A	W	A	W	A	A	A	A	NA	W	A	W	A	W	W	A	A	W	W	A	W	A	W	A	A	W	A	W	A
ChrI	16.6	A	A	A	W	W	A	A	W	A	A	A	A	W	A	A	W	A	W	W	A	W	A	W	A	A	A	A	W	W	A	W	A	W	W	A	A	W	W	A	W	A	W	A	A	W	A	W	A
ChrI	16.7	A	A	A	W	W	A	A	W	A	A	A	A	W	A	A	W	A	W	W	A	W	A	W	A	A	A	A	NA	W	A	W	A	W	NA	A	A	W	W	A	W	A	W	A	A	W	A	W	A
ChrI	16.8	A	A	A	W	W	A	A	W	A	A	A	A	W	A	A	W	A	W	W	A	W	A	NA	A	A	A	A	W	W	A	W	A	W	W	A	A	W	W	A	W	A	W	A	A	W	A	W	A
ChrI	16.9	A	A	A	W	W	A	A	W	A	A	A	A	W	A	A	W	A	W	W	A	W	A	W	A	A	A	A	NA	W	A	W	A	W	W	A	A	W	W	A	W	A	W	A	A	W	A	W	A
ChrI	17	A	A	A	W	W	A	A	W	A	A	A	A	W	A	A	W	A	W	W	A	W	A	W	A	A	A	A	W	W	A	W	A	W	W	A	A	W	W	A	W	A	W	A	A	W	A	W	A
ChrI	17.1	A	A	A	W	W	A	A	W	A	A	A	A	W	A	A	W	A	W	W	A	W	A	W	A	A	A	A	W	W	A	W	A	W	W	A	A	W	W	A	W	A	W	A	A	W	A	W	A
ChrI	17.2	A	A	A	W	W	A	A	W	A	A	A	A	W	A	A	W	A	W	W	A	W	A	W	A	A	A	A	W	W	A	W	A	W	W	A	A	W	W	A	W	A	W	A	A	W	A	W	A
ChrI	17.3	A	A	A	W	W	A	A	W	A	A	A	A	W	NA	A	W	NA	W	W	NA	W	A	W	A	A	A	A	W	W	A	W	A	W	W	A	A	W	W	A	W	A	W	A	A	W	A	W	A
ChrI	17.4	A	A	A	W	W	A	A	W	A	A	A	A	W	A	A	W	A	W	W	A	W	A	NA	A	A	A	A	W	W	A	W	A	W	W	A	A	W	W	A	W	A	W	A	A	W	A	W	A
ChrI	17.5	A	A	A	W	W	A	A	W	A	A	A	A	W	A	NA	W	A	W	W	A	W	A	W	A	A	A	A	W	W	A	W	A	W	W	A	A	W	W	A	W	A	W	A	A	W	A	W	A
ChrI	17.6	A	A	A	W	W	A	A	W	A	A	A	A	W	A	A	W	A	W	W	A	W	A	NA	A	A	A	A	W	W	A	W	A	W	W	A	A	W	W	A	W	A	W	A	A	W	A	W	A
ChrI	17.7	A	A	A	W	W	A	A	W	A	A	A	A	W	A	A	W	A	W	W	A	W	A	W	A	A	A	A	W	W	A	W	A	W	W	A	A	W	W	A	W	A	W	A	A	W	A	W	A
ChrI	17.8	A	A	A	W	W	A	A	W	A	A	A	A	W	A	A	W	A	W	W	A	W	A	W	A	A	A	A	W	W	A	W	A	W	W	A	A	W	W	A	W	A	W	A	A	W	A	W	A
ChrI	17.9	A	A	A	W	W	A	A	W	A	A	A	A	W	A	A	W	A	W	W	A	W	A	NA	A	A	A	A	W	W	A	W	A	W	W	A	A	W	W	A	W	A	W	A	A	W	A	W	A
ChrI	18	A	A	A	W	W	A	A	W	A	A	A	A	W	A	A	W	A	W	W	A	W	A	W	A	A	A	A	W	W	A	W	A	W	W	A	A	W	W	A	W	A	W	A	A	W	A	W	A
ChrI	18.1	A	A	A	W	W	A	A	W	A	A	A	A	W	A	A	W	A	W	W	A	W	A	NA	A	A	A	A	W	W	A	W	A	W	W	A	A	W	W	A	W	A	W	A	A	W	A	W	A
ChrI	18.2	A	A	A	W	W	A	A	W	A	A	A	A	W	A	A	W	A	W	W	A	W	A	W	A	A	A	A	W	W	A	W	A	W	W	A	A	W	W	A	W	A	W	A	A	W	A	W	A
ChrI	18.3	A	A	A	W	W	A	A	W	A	A	A	A	W	A	A	W	A	W	W	A	W	A	W	A	A	A	A	W	W	A	W	A	W	W	A	A	W	W	NA	W	A	W	A	A	W	A	W	A
ChrI	18.4	A	A	A	W	W	A	A	W	A	A	A	A	W	A	A	W	A	W	W	A	W	A	W	A	A	A	A	W	W	A	W	A	W	NA	A	A	W	W	A	W	A	W	A	A	W	A	W	A
ChrI	18.5	A	A	A	W	W	A	A	W	A	A	A	A	W	A	A	W	A	W	W	A	W	A	W	A	A	A	A	W	W	A	W	A	W	NA	A	A	W	W	A	W	A	W	A	A	W	A	W	A
ChrI	18.6	A	A	A	W	W	A	A	W	A	A	A	A	W	A	A	W	A	W	W	A	W	A	W	A	A	A	A	NA	W	A	W	A	W	W	A	A	W	W	A	W	A	W	A	A	W	A	W	A
ChrI	18.7	A	A	A	W	W	A	A	W	A	A	A	A	W	A	A	W	A	W	W	A	W	A	NA	A	A	A	A	W	W	A	W	A	W	W	A	A	W	W	A	W	A	W	A	A	W	A	W	A
ChrI	18.8	A	A	A	W	W	A	A	W	A	A	A	A	W	A	A	W	A	W	W	A	W	A	W	A	A	A	A	W	W	A	W	A	W	W	A	A	W	W	A	W	A	W	A	A	W	A	W	A
ChrI	18.9	A	A	A	W	W	A	A	W	A	A	A	A	W	A	A	W	A	W	W	A	W	A	NA	A	A	A	A	W	W	A	W	A	W	NA	A	A	W	W	A	W	A	W	A	A	W	A	W	A
ChrI	19	A	A	A	W	W	A	A	W	A	A	A	A	W	A	A	W	A	W	W	A	W	A	NA	A	A	A	A	W	W	A	W	A	W	NA	A	A	W	W	A	W	A	W	A	A	W	A	W	A
ChrI	19.1	A	A	A	W	W	A	A	W	A	A	A	A	W	A	A	W	A	W	W	A	W	A	W	A	A	A	A	W	W	A	W	A	NA	W	A	A	W	W	A	W	A	W	A	A	W	A	W	A
ChrI	19.2	A	A	A	W	W	A	A	W	A	A	A	A	W	A	A	W	A	W	W	A	W	A	NA	A	A	A	A	W	W	A	W	A	W	NA	A	A	W	W	A	W	A	W	A	A	W	A	W	A
ChrI	19.3	A	A	A	W	W	A	A	W	A	A	A	A	W	A	A	W	A	W	W	A	W	A	W	A	A	A	NA	W	W	A	W	A	W	W	A	A	W	W	A	W	A	W	A	A	W	A	W	A
ChrI	19.4	A	A	A	W	W	A	A	W	A	A	A	A	W	A	A	W	A	W	W	A	W	A	W	A	A	A	A	W	W	A	W	A	W	W	A	A	W	W	A	W	A	W	A	A	W	A	W	A
ChrI	19.5	A	A	A	W	W	NA	A	W	A	A	NA	A	W	A	NA	W	NA	W	W	A	W	A	W	A	NA	NA	A	W	W	NA	W	A	W	W	NA	NA	W	W	A	W	NA	W	A	NA	W	NA	W	A
ChrI	19.6	A	A	A	W	W	A	A	W	A	A	A	A	W	A	A	W	A	W	W	A	W	A	W	A	A	A	A	W	W	A	W	A	W	NA	A	A	W	W	A	W	A	W	A	A	W	A	W	A
ChrI	19.7	A	A	A	W	W	A	A	W	A	A	A	A	W	A	A	W	A	W	W	A	W	A	W	A	A	A	A	W	W	A	W	A	W	W	A	A	W	W	A	W	A	W	A	A	W	A	W	A
ChrI	19.8	A	A	A	W	W	A	A	W	A	A	A	A	W	A	A	W	A	W	W	A	W	A	W	A	A	A	A	W	W	A	W	A	W	NA	A	A	W	W	A	W	A	W	A	A	W	A	W	A
ChrI	19.9	A	A	A	W	W	A	A	W	A	A	A	A	W	A	A	W	A	W	W	A	W	A	W	A	A	A	A	W	W	A	W	A	W	W	A	A	W	W	A	W	A	W	A	A	W	A	W	A
ChrI	20	A	A	A	W	W	A	NA	W	A	A	A	A	W	A	A	W	A	W	W	A	W	A	W	A	A	A	A	W	W	A	W	A	W	NA	A	A	W	W	A	W	A	W	A	A	W	A	W	A
ChrI	20.1	A	A	A	W	W	A	A	W	A	A	A	A	W	A	A	W	A	W	W	A	W	A	W	A	A	NA	A	W	W	A	W	A	W	NA	A	A	W	W	A	W	A	W	A	A	W	A	W	A
ChrI	20.2	A	A	A	W	W	A	A	W	A	A	A	A	W	A	A	W	A	W	W	A	W	A	W	A	A	A	A	W	W	A	W	A	W	W	A	A	W	W	A	W	A	W	A	A	W	A	W	A
ChrI	20.3	A	A	A	W	W	A	A	W	A	A	A	A	W	A	A	W	A	W	W	A	W	A	W	A	A	A	A	W	W	A	W	A	W	W	A	A	W	W	A	W	A	W	A	A	W	A	W	A
ChrI	20.4	A	A	A	W	W	A	A	W	A	A	A	A	W	A	A	W	A	W	W	NA	W	A	W	A	A	A	A	W	W	A	W	A	W	W	A	A	W	W	A	W	A	W	A	A	W	A	W	A
ChrI	20.5	A	A	A	W	W	A	A	W	A	A	A	A	W	A	A	W	A	W	W	NA	W	A	W	A	NA	A	A	W	W	A	W	A	W	W	A	A	W	W	A	W	A	W	A	A	W	A	W	A
ChrI	20.6	A	A	A	W	W	A	A	W	A	A	A	A	W	A	A	W	A	W	W	A	W	A	W	A	A	A	A	W	W	A	W	A	W	NA	A	A	W	W	A	W	A	W	A	A	W	A	W	A
ChrI	20.7	A	A	A	W	W	A	A	W	A	A	A	A	W	A	A	W	A	W	W	A	W	A	W	A	A	A	A	W	W	A	W	A	W	NA	A	A	W	W	A	W	A	W	A	A	W	A	W	A
ChrI	20.8	NA	NA	NA	W	W	NA	A	W	A	NA	NA	NA	W	A	NA	W	A	W	W	A	W	A	W	NA	A	A	A	W	W	A	W	A	W	NA	A	A	W	W	A	W	A	W	A	NA	W	A	W	A
ChrI	20.9	A	A	A	W	W	A	A	W	A	A	A	A	W	A	A	W	A	W	W	A	W	A	NA	A	A	A	A	NA	W	A	W	A	W	W	A	A	W	W	A	W	A	W	A	A	W	A	W	A
ChrI	21	A	A	A	W	W	A	A	W	A	A	A	A	W	A	A	W	A	W	W	A	W	A	W	A	A	A	A	W	W	A	W	A	W	W	A	A	W	W	A	W	A	W	A	A	W	A	W	A
ChrI	21.1	A	A	A	W	W	A	A	W	A	A	A	A	W	A	A	W	A	W	W	A	W	A	NA	A	A	A	A	NA	W	A	W	A	W	NA	A	A	W	W	A	W	A	W	A	A	W	A	W	A
ChrI	21.2	A	A	A	W	W	A	A	W	A	A	A	A	W	A	A	W	A	W	W	A	W	A	W	A	A	A	A	W	W	A	W	A	W	NA	A	A	W	W	A	W	A	W	A	A	W	A	W	A
ChrI	21.3	A	A	A	W	W	A	A	W	A	A	A	A	W	A	A	W	A	W	W	A	W	A	W	A	A	A	A	NA	W	A	W	A	W	NA	A	A	W	W	A	W	A	W	A	A	W	A	W	A
ChrI	21.4	A	A	A	W	W	A	A	W	A	A	A	A	W	A	A	W	A	W	W	A	W	A	W	A	A	A	A	W	W	A	W	A	W	NA	A	A	W	W	A	W	A	W	A	A	W	A	W	A
ChrI	21.5	A	A	A	W	W	A	A	W	A	A	A	A	W	A	A	W	A	W	W	A	W	A	W	A	A	A	A	W	W	A	W	A	W	W	A	A	W	W	A	W	A	W	A	A	W	A	W	A
ChrI	21.6	A	A	A	W	W	A	A	W	A	A	A	A	W	A	A	W	A	W	W	A	W	A	W	A	A	A	A	W	W	A	W	A	W	W	A	A	W	W	A	W	A	W	A	A	W	A	W	A
ChrI	21.7	A	A	A	W	W	A	A	W	A	A	A	A	W	A	A	W	A	W	W	A	W	A	W	A	A	A	A	W	W	A	W	A	W	W	A	A	W	W	A	W	A	W	A	A	W	A	W	A
ChrI	21.8	A	A	A	W	W	A	A	W	A	A	A	A	W	A	A	W	A	W	W	A	W	A	W	A	A	A	A	NA	W	A	W	A	W	W	A	A	W	W	A	W	A	W	A	A	W	A	W	A
ChrI	22	A	A	A	W	W	A	A	W	A	A	A	A	W	A	A	W	A	W	W	A	W	A	W	A	A	A	A	W	W	A	W	A	W	W	A	A	W	W	A	W	A	W	A	A	W	A	W	A
ChrI	22.1	A	A	A	W	W	A	A	W	A	A	A	A	W	A	A	W	A	W	W	A	W	A	W	A	A	A	A	NA	W	A	W	A	W	NA	A	A	W	W	A	W	A	W	A	A	W	A	W	A
ChrI	22.2	A	A	A	W	W	A	A	W	A	A	A	A	W	A	A	W	A	W	W	A	W	A	W	A	A	A	A	NA	W	A	W	A	W	W	A	A	W	W	A	W	A	W	A	A	W	A	W	A
ChrI	22.3	A	A	A	W	W	A	A	W	A	A	A	A	W	A	A	W	A	W	W	A	W	A	W	A	A	A	A	W	W	A	W	A	W	NA	A	A	W	W	A	W	A	W	A	A	W	A	W	A
ChrI	22.4	A	A	A	W	W	A	A	W	A	A	A	A	W	A	A	W	A	W	W	A	W	A	W	A	A	A	A	W	W	A	W	A	W	W	A	A	W	W	A	W	A	W	A	A	W	A	W	A
ChrI	22.5	A	A	A	W	W	A	A	W	A	A	A	A	W	A	A	W	A	W	W	A	W	A	W	A	A	A	A	W	W	A	W	A	W	NA	A	A	W	W	A	W	A	W	A	A	W	A	W	A
ChrI	22.6	A	A	A	W	W	A	A	W	A	A	A	A	W	A	A	W	A	W	W	A	W	A	W	A	A	A	A	NA	W	A	W	A	W	NA	A	A	W	W	A	W	A	W	A	A	W	A	W	A
ChrI	22.7	A	A	A	W	W	A	A	W	A	A	A	A	W	A	A	W	A	W	W	A	W	A	W	A	A	A	A	W	W	A	W	A	W	W	A	A	W	W	A	W	A	W	A	A	W	A	W	A
ChrI	22.9	A	A	A	W	W	A	A	W	A	A	A	A	W	A	A	W	A	W	W	A	W	A	W	A	A	A	A	W	W	A	W	A	W	W	A	A	W	W	A	W	A	W	A	A	W	A	W	A
ChrI	23	A	A	A	W	W	A	A	W	A	A	A	A	W	A	A	W	A	W	W	A	W	A	W	A	A	A	A	W	W	A	W	A	W	W	A	A	W	W	A	W	A	W	A	A	W	A	W	A
ChrI	23.1	A	A	A	W	W	A	A	W	A	A	A	A	W	A	A	W	A	W	W	A	W	A	W	A	A	A	A	W	W	A	W	A	W	NA	A	A	W	W	A	W	A	W	A	A	W	A	W	A
ChrI	23.2	A	NA	A	W	W	A	A	W	A	A	A	A	W	A	A	W	A	W	W	NA	W	NA	W	A	A	A	A	W	W	A	W	A	W	W	A	A	W	W	A	W	A	W	NA	A	W	A	W	A
ChrI	23.4	A	A	A	W	W	A	A	W	A	A	A	A	W	A	A	W	A	W	W	A	W	A	W	A	A	A	A	W	W	A	W	A	W	NA	A	A	W	W	A	W	A	W	A	A	W	A	W	A
ChrI	23.5	A	A	A	W	W	A	A	W	A	A	A	A	W	A	A	W	A	W	W	A	W	A	W	A	A	A	A	NA	W	A	W	A	W	NA	A	A	W	W	A	W	A	W	A	A	W	A	W	A
ChrI	23.6	A	A	A	W	W	A	A	W	A	A	A	A	W	A	A	W	A	W	W	A	W	A	NA	A	A	A	A	W	W	A	W	A	W	NA	A	A	W	W	A	W	A	W	A	A	W	A	W	A
ChrI	23.7	A	A	A	W	W	A	A	W	A	A	A	A	W	A	A	W	A	W	W	NA	W	A	W	A	A	A	A	W	W	A	W	A	W	W	A	A	W	W	A	W	A	W	A	A	W	A	W	A
ChrI	23.8	A	A	A	W	W	A	A	W	A	A	A	A	W	A	A	W	A	W	W	A	W	A	W	A	A	A	A	W	W	A	W	A	W	W	A	A	W	W	A	W	A	W	A	A	W	A	W	A
ChrI	23.9	A	A	A	W	W	A	A	W	A	A	A	A	W	A	NA	W	A	W	W	A	W	A	W	A	A	A	A	W	W	A	W	A	W	NA	A	A	W	W	A	W	A	W	A	A	W	A	W	A
ChrI	24	A	A	A	W	W	A	A	W	A	A	A	A	W	A	NA	W	A	W	W	A	W	A	W	A	A	A	A	W	W	A	W	A	W	NA	A	A	W	W	A	W	A	W	A	A	W	A	W	A
ChrI	24.1	A	A	A	W	W	A	A	W	A	A	A	A	W	A	A	W	A	W	W	A	W	A	W	A	A	A	A	W	W	A	W	A	W	W	A	A	W	W	A	W	A	W	A	A	W	A	W	A
ChrI	24.2	A	A	A	W	W	A	A	W	A	A	A	A	W	A	A	W	A	W	W	A	W	A	W	A	A	A	A	W	W	A	W	A	W	NA	A	A	W	W	A	W	A	W	A	A	W	A	W	A
ChrI	24.3	A	A	A	W	W	A	A	W	A	A	A	A	W	A	A	W	A	W	W	A	W	A	W	A	A	A	A	W	W	A	W	A	W	W	A	A	W	W	A	W	A	W	A	A	W	A	W	A
ChrI	24.4	A	A	A	W	W	A	A	W	A	A	A	A	W	A	A	W	A	W	W	A	W	A	W	A	A	A	A	W	W	A	W	A	W	W	A	A	W	W	A	W	A	W	A	A	W	A	W	A
ChrI	24.5	A	A	A	W	W	A	A	W	A	A	A	A	W	A	A	W	A	W	W	A	W	A	W	A	A	A	A	W	W	A	W	A	W	W	A	A	W	W	A	W	A	W	A	A	W	A	W	A
ChrI	24.6	A	A	A	W	W	A	A	W	A	A	A	A	W	A	A	W	A	W	W	A	W	A	W	A	A	A	A	W	W	A	W	A	W	NA	A	A	W	W	A	W	A	W	A	A	W	A	W	A
ChrI	24.7	A	A	A	W	W	A	A	W	A	A	A	A	W	A	A	W	A	W	W	A	W	A	W	A	A	A	A	W	W	A	W	A	W	NA	A	A	W	W	A	W	A	W	A	A	W	A	W	A
ChrI	24.8	A	A	A	W	W	A	A	W	A	A	A	A	W	A	A	W	A	W	W	A	W	A	W	A	A	A	A	W	W	A	W	A	W	W	A	A	W	W	A	W	A	W	A	A	W	A	W	A
ChrI	24.9	A	A	A	W	W	A	A	W	A	A	A	A	W	A	A	W	A	W	W	A	W	NA	W	A	A	A	A	W	W	A	W	A	W	W	A	A	W	W	A	W	A	W	A	A	W	A	W	A
ChrI	25	A	A	A	W	W	A	A	W	A	A	A	A	W	A	A	W	A	W	W	A	W	W	W	A	A	A	A	W	W	A	W	A	W	W	A	A	W	W	A	W	A	W	A	A	W	A	W	A
ChrI	25.1	A	A	A	W	W	A	A	W	A	A	A	A	W	A	A	W	A	W	W	A	W	W	W	A	A	A	A	W	W	A	W	A	W	W	A	A	W	W	A	W	A	W	A	A	W	A	W	A
ChrI	25.2	A	A	A	W	W	A	A	W	A	A	A	A	W	NA	A	W	A	W	W	A	W	W	W	A	A	A	A	W	W	NA	W	A	W	NA	A	A	W	W	A	W	A	W	A	A	W	A	W	A
ChrI	25.3	A	A	A	W	W	A	A	W	A	A	A	A	W	A	A	W	A	W	W	A	W	W	NA	A	A	A	A	NA	W	A	W	A	W	NA	A	A	W	W	A	W	A	W	A	A	W	A	W	A
ChrI	25.4	A	A	A	W	W	A	A	W	A	A	A	A	W	A	A	W	A	W	W	A	W	W	W	A	A	A	A	NA	W	A	W	A	W	W	A	A	W	W	A	W	A	W	A	A	W	A	W	A
ChrI	25.5	A	A	A	W	W	A	A	W	A	A	A	A	W	A	A	W	A	W	W	A	W	W	NA	A	A	A	A	NA	W	A	W	A	W	W	A	A	W	W	A	W	A	W	A	A	W	A	W	A
ChrI	25.6	A	A	A	W	W	A	A	W	A	A	A	A	W	A	A	W	A	W	W	NA	W	W	W	A	A	A	A	W	W	A	W	A	W	W	A	A	W	W	A	W	A	W	A	A	W	A	W	A
ChrI	25.7	A	A	A	W	W	A	A	W	A	A	A	A	W	A	A	W	A	W	W	A	W	W	W	A	A	A	A	W	W	A	W	A	W	W	A	A	W	W	A	W	A	W	A	A	W	A	W	A
ChrI	25.8	A	A	A	W	W	A	A	W	A	A	A	A	W	A	A	W	A	W	W	A	W	W	W	A	A	A	A	W	W	A	W	A	W	W	A	A	W	W	A	W	A	W	A	A	W	A	W	A
ChrI	25.9	A	A	A	W	W	A	A	W	A	A	A	A	W	A	A	W	A	W	W	A	W	W	W	A	A	A	A	W	W	A	W	A	W	NA	A	A	W	W	A	W	A	W	A	A	W	A	W	A
ChrI	26	A	A	A	W	W	A	A	W	A	A	A	A	W	A	A	W	A	W	W	A	W	W	W	A	A	A	A	W	W	A	W	A	W	W	A	A	W	W	A	W	A	W	A	A	W	A	W	A
ChrI	26.1	A	A	A	W	W	A	A	W	A	A	A	A	W	A	A	W	A	W	W	A	W	W	W	A	A	A	A	W	W	A	W	A	W	NA	A	A	W	W	A	W	A	W	A	A	W	A	W	A
ChrI	26.2	A	A	A	W	W	A	A	W	A	A	A	A	W	A	A	W	A	W	W	A	W	W	W	A	A	A	A	W	W	A	W	A	W	NA	A	A	W	W	A	W	A	W	A	A	W	A	W	A
ChrI	26.3	A	A	A	W	W	A	A	W	A	A	A	A	W	A	A	W	A	W	W	A	W	W	W	A	A	A	A	W	W	A	W	A	W	NA	A	A	W	W	A	W	A	W	A	A	W	A	W	A
ChrI	26.4	A	A	A	W	W	A	A	W	A	A	A	A	W	A	A	W	A	W	W	A	W	W	W	A	A	A	A	W	W	A	W	A	W	W	A	A	W	W	A	W	A	W	A	A	W	A	W	A
ChrI	26.5	A	A	A	W	W	A	A	W	A	A	A	A	W	A	A	W	A	W	W	A	W	W	W	A	A	A	A	W	W	A	W	A	W	W	A	A	W	W	A	W	A	W	A	A	W	A	W	A
ChrI	26.6	A	A	A	W	W	A	A	W	A	A	A	A	W	A	A	W	A	W	W	A	W	W	W	A	A	A	A	NA	W	A	W	A	W	W	A	A	W	W	A	W	A	W	A	A	W	A	W	A
ChrI	26.7	A	A	A	W	W	A	A	W	A	A	A	A	W	A	A	W	A	W	W	A	W	W	W	A	A	A	A	W	W	A	W	A	W	NA	A	A	W	W	A	W	A	W	A	A	W	A	W	A
ChrI	26.8	A	A	A	W	W	A	A	W	A	A	A	A	W	A	A	W	A	W	W	A	W	W	W	A	A	A	A	NA	W	A	W	A	W	NA	A	A	W	W	A	W	A	W	A	A	W	A	NA	A
ChrI	26.9	A	A	A	W	W	A	A	W	A	A	A	A	W	A	A	W	A	W	W	A	W	W	W	A	A	A	A	NA	W	A	W	A	W	NA	A	A	W	W	A	W	A	W	A	A	W	A	W	A
ChrI	27	A	A	A	W	W	A	A	W	A	A	A	A	W	A	A	W	A	W	W	A	W	W	W	A	A	A	A	NA	W	A	W	A	W	W	A	A	W	W	A	W	A	W	A	A	W	A	W	A
ChrI	27.1	A	A	A	W	W	A	A	W	A	A	A	A	W	A	A	W	A	W	W	A	W	W	NA	A	A	A	A	NA	W	A	W	A	W	NA	A	A	W	W	A	W	A	W	A	A	W	A	W	A
ChrI	27.2	A	A	A	W	W	A	A	W	A	A	A	A	W	A	A	W	A	W	W	A	W	W	NA	A	A	A	A	W	W	A	W	A	W	W	A	A	W	W	A	W	A	W	A	A	W	A	W	A
ChrI	27.3	A	A	A	W	W	A	A	W	A	A	A	A	W	A	A	W	A	W	W	A	W	W	W	A	A	A	A	W	W	A	W	A	W	W	A	A	W	W	A	W	A	W	A	A	W	A	W	A
ChrI	27.4	A	A	A	W	W	A	A	W	A	A	A	A	W	A	A	W	NA	W	W	A	W	W	W	A	A	A	A	W	W	A	W	A	W	W	A	A	W	W	A	W	A	W	A	A	W	A	W	A
ChrI	27.5	A	A	A	W	W	A	NA	W	A	A	A	NA	W	A	A	W	A	W	W	NA	W	W	W	NA	NA	A	NA	W	W	A	W	A	W	W	A	A	W	W	A	W	A	W	A	A	W	A	W	NA
ChrI	27.6	A	A	A	W	W	A	A	W	A	A	A	A	W	A	A	W	A	W	W	A	W	W	W	A	A	A	A	W	W	A	W	A	W	NA	A	A	W	W	A	W	A	W	A	A	W	A	W	A
ChrI	27.7	A	A	A	W	W	A	A	W	A	A	A	A	W	A	A	W	A	W	W	A	W	W	NA	A	A	A	A	NA	W	A	W	A	W	NA	A	A	W	W	A	W	A	W	A	A	W	A	W	A
ChrI	27.8	A	A	A	W	W	A	A	W	A	A	A	A	W	A	A	W	A	W	W	A	W	W	W	A	A	A	A	W	W	A	W	A	W	NA	A	A	W	W	A	W	A	W	A	A	W	A	W	A
ChrI	27.9	A	A	A	W	W	A	A	W	A	A	A	A	W	A	A	W	A	W	W	A	W	W	NA	A	A	A	A	NA	W	A	W	A	W	W	A	A	W	W	A	W	A	W	A	A	W	A	W	A
ChrI	28	A	A	A	W	W	A	A	W	A	A	A	A	W	A	A	W	A	W	W	A	W	W	W	A	NA	A	A	W	W	A	W	A	W	W	A	A	W	W	A	W	A	W	A	A	W	A	W	A
ChrI	28.1	A	A	A	W	W	A	A	W	A	A	A	A	W	A	A	W	NA	W	W	A	W	W	W	A	A	A	A	W	W	A	W	A	W	W	A	A	W	W	A	W	A	W	A	A	W	A	W	A
ChrI	28.2	A	A	A	W	W	A	A	W	A	A	A	A	W	A	NA	W	A	W	W	A	W	W	W	A	A	A	A	NA	W	A	W	A	W	NA	A	A	W	W	A	W	A	W	A	A	W	A	W	A
ChrI	28.3	A	A	A	W	W	A	A	W	A	A	A	A	W	A	A	W	A	W	W	A	W	W	W	A	A	A	A	W	W	A	W	A	W	NA	A	A	W	W	A	W	A	W	A	A	W	A	W	A
ChrI	28.4	A	A	A	W	W	A	A	W	A	A	A	A	W	A	A	W	A	W	W	A	W	W	W	A	A	A	A	NA	W	A	W	A	W	NA	A	A	W	W	A	W	A	W	A	A	W	A	W	A
ChrI	28.5	A	A	A	W	W	A	A	W	A	A	A	A	W	A	A	W	A	W	W	A	W	W	W	A	A	A	A	W	W	A	W	A	W	W	A	A	W	W	A	W	A	W	A	A	W	A	W	A
ChrI	28.6	A	A	A	W	W	A	A	W	A	A	A	A	W	A	A	W	A	W	W	A	W	W	W	A	A	A	A	NA	W	A	W	A	W	W	A	A	W	W	A	W	A	W	A	A	W	A	W	A
ChrI	28.7	A	A	A	W	W	A	A	W	A	A	A	A	W	A	A	W	A	W	W	A	W	W	W	A	A	A	A	W	W	A	W	A	W	NA	A	A	W	W	A	W	A	W	A	A	W	A	W	A
ChrI	28.8	A	A	A	W	W	A	A	W	A	A	A	A	W	A	NA	W	A	W	W	A	W	W	W	A	A	A	A	W	W	A	W	A	W	W	A	A	W	W	A	W	A	W	A	A	W	A	W	A
ChrI	28.9	A	A	A	W	W	A	A	W	A	A	A	A	W	A	A	W	A	W	W	A	W	W	W	A	A	A	A	W	W	A	W	A	W	W	A	A	W	W	A	W	A	W	A	A	W	A	W	A
ChrI	29	A	A	A	W	W	A	A	W	A	A	A	A	W	A	A	W	A	W	W	A	W	W	W	A	A	A	A	W	W	A	W	A	W	W	A	A	W	W	A	W	A	W	A	A	W	A	W	A
ChrI	29.1	A	A	A	W	W	NA	A	W	A	A	A	A	W	A	NA	W	A	W	W	A	W	W	W	A	A	A	A	W	W	A	W	A	W	W	A	A	W	W	A	W	A	W	A	A	W	NA	W	A
ChrI	29.2	A	A	A	W	W	A	A	W	A	A	A	A	W	A	A	W	A	W	W	A	W	W	W	A	A	A	A	W	W	A	W	A	W	W	A	A	W	W	A	W	A	W	A	A	W	A	W	A
ChrI	29.3	A	A	A	W	W	A	A	W	A	A	A	A	W	A	A	W	A	W	W	A	W	W	W	A	A	A	A	W	W	A	W	A	W	W	A	A	W	W	A	W	A	W	A	A	W	A	W	A
ChrI	29.4	A	A	A	W	W	A	A	W	A	A	A	A	W	A	A	W	A	W	W	A	W	W	W	A	A	A	A	W	W	A	W	A	W	W	A	A	W	W	A	W	A	W	A	A	W	A	W	A
ChrI	29.5	A	A	A	W	W	A	A	W	A	A	A	A	W	A	A	W	A	W	W	A	W	W	NA	A	A	A	A	W	W	A	W	A	W	W	A	A	W	W	A	W	A	W	A	A	W	A	W	A
ChrI	29.6	A	A	A	W	W	A	A	W	A	A	A	A	W	A	A	W	A	W	W	A	W	W	NA	A	A	A	A	W	W	A	W	A	W	W	A	A	W	W	A	W	A	W	A	A	W	A	W	A
ChrI	29.7	A	A	A	W	W	A	A	W	A	A	A	A	W	A	A	W	A	W	W	A	W	W	NA	A	A	A	A	NA	W	A	W	A	W	W	A	A	W	W	A	W	A	W	A	A	W	A	NA	A
ChrI	29.8	A	A	A	W	W	A	A	W	A	A	A	A	W	A	A	W	A	W	W	A	W	W	NA	A	A	A	A	NA	W	A	W	A	W	W	A	A	W	W	A	W	A	W	A	A	W	A	NA	A
ChrI	29.9	A	A	A	W	W	A	A	W	A	A	A	A	W	A	A	W	A	W	W	A	W	W	W	A	A	A	A	NA	W	A	W	A	W	W	A	A	W	W	A	W	A	W	A	A	W	A	NA	A
ChrI	30	A	A	A	W	W	A	A	W	A	A	A	A	W	A	A	W	A	W	W	A	W	W	W	A	A	A	A	W	W	A	W	A	W	W	A	A	W	W	A	W	A	W	A	A	W	A	W	A
ChrI	30.1	A	A	A	W	W	A	A	W	A	A	A	A	W	A	A	W	A	W	W	A	W	W	W	A	A	A	A	NA	W	A	W	A	W	W	A	A	W	W	A	W	A	W	A	A	W	A	W	A
ChrI	30.2	A	A	A	W	W	A	A	W	A	A	A	A	W	A	A	W	A	W	W	A	W	W	W	A	A	A	A	W	W	A	W	A	W	W	A	A	W	W	A	W	A	W	A	A	W	A	W	A
ChrI	30.3	NA	A	A	W	W	A	A	W	A	A	A	A	W	A	A	W	A	W	W	A	W	W	W	A	A	A	A	W	W	A	W	A	W	NA	A	A	W	W	A	W	A	W	A	A	W	A	W	A
ChrI	30.4	W	A	A	W	W	A	A	W	A	A	A	A	W	A	A	W	A	W	W	A	W	W	W	A	A	A	A	W	W	A	W	A	W	W	A	A	W	W	A	W	A	W	A	A	W	A	W	A
ChrI	30.5	W	A	A	W	W	A	A	W	A	A	A	A	W	A	A	W	A	W	W	A	W	W	NA	A	A	A	A	W	W	A	W	A	W	NA	A	A	W	W	A	W	A	W	A	A	W	A	W	A
ChrI	30.6	W	A	A	W	W	A	A	W	A	A	A	A	W	A	A	W	A	W	W	A	W	W	W	A	A	A	A	W	W	A	W	A	W	NA	A	A	W	W	A	W	A	W	A	A	W	A	W	A
ChrI	30.7	W	A	A	W	W	A	A	W	A	A	A	A	W	A	A	W	A	W	W	A	W	W	W	A	A	A	A	W	W	A	W	A	W	W	A	A	W	W	A	W	A	W	A	A	W	A	W	A
ChrI	30.8	W	A	A	W	W	A	A	W	A	A	A	A	W	A	A	W	A	W	W	A	W	W	NA	A	A	A	A	W	W	A	W	A	W	NA	A	A	W	W	A	W	A	W	A	A	W	A	W	A
ChrI	30.9	W	A	A	W	W	A	A	W	A	A	A	A	W	A	A	W	A	W	W	A	W	W	W	A	A	A	A	W	W	A	W	A	W	W	A	A	W	W	A	W	A	W	A	A	W	A	W	A
ChrI	31	W	A	A	W	W	A	A	W	A	A	A	A	W	A	A	W	A	W	A	A	W	W	W	A	A	A	A	W	W	A	W	A	W	W	A	A	W	W	A	W	A	W	A	A	W	A	NA	A
ChrI	31.1	W	A	A	W	W	A	A	W	A	A	A	A	W	A	A	W	A	W	A	A	W	W	W	A	A	A	A	W	W	A	W	A	W	W	A	A	W	W	A	W	A	W	A	A	W	A	W	A
ChrI	31.2	W	A	A	W	W	A	A	W	A	A	A	A	W	A	A	W	A	W	A	A	W	W	W	A	A	A	A	NA	W	A	W	A	W	NA	A	A	W	W	A	W	A	W	A	A	W	A	W	A
ChrI	31.3	W	A	A	W	W	A	A	W	A	A	A	A	W	A	A	W	A	W	A	A	W	W	NA	A	A	A	A	W	W	A	W	A	W	W	A	A	W	W	A	W	A	W	A	A	W	A	W	A
ChrI	31.4	W	A	A	W	W	A	A	W	A	A	A	A	W	A	A	W	A	W	A	A	W	W	NA	A	A	A	A	W	W	A	W	A	W	W	A	A	W	W	A	W	A	W	A	A	W	A	NA	A
ChrI	31.5	W	A	A	W	W	A	A	W	A	A	A	A	W	A	A	W	A	W	A	A	W	W	NA	A	A	A	A	W	W	A	W	A	W	W	A	A	W	W	A	W	A	W	A	A	W	A	W	A
ChrI	31.6	W	A	A	W	W	A	A	W	A	A	A	A	W	A	A	W	A	W	A	A	W	W	W	A	A	A	A	W	W	A	W	A	W	W	A	A	W	W	A	W	A	W	A	A	W	A	W	A
ChrI	31.7	W	A	A	W	W	A	A	W	A	A	A	A	W	A	A	W	A	W	A	A	W	W	W	A	A	A	A	W	W	A	W	A	W	NA	A	A	W	W	A	W	A	W	A	A	W	A	W	A
ChrI	31.8	W	A	A	W	W	A	A	W	A	A	A	A	W	A	A	W	A	W	A	A	W	W	W	A	A	A	A	W	W	A	W	A	W	W	A	A	W	W	A	W	A	W	A	A	W	A	W	A
ChrI	31.9	W	A	A	W	W	A	A	W	A	A	A	A	W	A	A	W	A	W	A	A	W	W	W	A	A	A	A	W	W	A	W	A	W	W	A	A	W	W	A	W	A	W	A	A	W	A	W	A
ChrI	32	W	A	A	W	W	A	A	W	A	A	A	A	W	A	A	W	A	W	A	NA	W	W	W	A	A	A	A	W	W	A	W	A	W	W	A	A	W	W	A	W	A	W	A	A	W	A	W	A
ChrI	32.1	W	A	A	W	W	A	A	W	A	A	A	A	W	A	A	W	A	W	A	A	W	W	W	A	A	A	A	NA	W	A	W	A	W	NA	A	A	W	W	A	W	A	W	A	A	W	A	W	A
ChrI	32.2	W	A	A	W	W	A	A	W	A	A	A	A	W	A	A	W	A	W	A	A	W	W	W	A	A	A	A	W	W	A	W	A	W	W	A	A	W	W	A	W	A	W	A	A	W	A	W	A
ChrI	32.3	W	A	A	W	W	A	A	W	A	A	A	A	W	A	A	W	A	W	A	A	W	W	NA	A	A	A	A	W	W	A	W	A	W	W	A	A	W	W	A	W	A	W	A	A	W	A	W	A
ChrI	32.4	W	A	A	W	W	A	A	W	A	A	A	A	W	A	A	W	A	W	A	A	W	W	NA	A	A	A	A	NA	W	A	W	A	W	W	A	A	W	W	A	W	A	W	A	A	W	A	W	A
ChrI	32.5	W	A	A	W	W	A	A	W	A	A	A	A	W	A	A	W	A	W	A	A	W	W	W	A	A	A	A	W	W	A	W	A	W	A	A	A	W	W	A	W	A	W	A	A	W	A	W	A
ChrI	32.6	W	A	A	W	W	A	A	W	A	A	A	A	W	A	NA	W	A	W	A	A	W	W	W	A	A	A	NA	W	W	A	W	A	W	A	A	A	W	W	A	W	A	W	A	A	W	A	W	A
ChrI	32.7	W	A	A	W	W	A	A	W	A	A	A	A	W	A	A	W	A	W	A	A	W	W	W	A	A	A	NA	W	W	A	W	A	W	A	A	A	W	W	A	W	A	W	A	A	W	A	NA	A
ChrI	32.8	W	A	A	W	W	A	A	W	A	A	A	A	W	A	A	W	A	W	A	A	W	W	W	A	A	A	W	NA	W	A	W	A	W	A	A	A	W	NA	A	W	A	W	A	A	W	A	W	A
ChrI	32.9	W	A	A	W	W	A	A	W	A	A	A	A	W	NA	A	W	A	W	A	A	W	W	W	A	A	A	W	NA	W	A	W	A	W	A	A	A	W	W	A	W	A	W	A	A	W	A	W	A
ChrI	33	W	A	A	W	W	A	A	W	A	A	A	A	W	A	A	W	A	W	A	A	W	W	W	A	A	A	W	W	W	A	W	A	W	A	A	A	W	W	A	W	A	W	A	A	W	A	W	A
ChrI	33.1	W	A	A	W	W	A	A	W	A	A	A	A	W	A	NA	W	A	W	A	A	W	W	W	A	A	A	W	W	W	A	W	A	W	A	A	A	W	W	A	W	A	W	A	A	W	A	W	A
ChrI	33.2	W	A	A	W	W	A	A	W	A	A	A	A	W	A	A	W	A	W	A	A	W	W	W	A	A	A	W	W	W	A	W	A	W	A	A	A	W	W	A	W	A	W	A	A	W	A	W	A
ChrI	33.3	W	A	A	W	W	A	A	W	A	A	A	A	W	A	A	W	A	W	A	A	W	W	W	A	A	A	W	W	W	A	W	A	W	A	A	A	W	W	A	W	A	W	A	A	W	A	W	A
ChrI	33.4	W	A	A	W	W	A	A	W	A	A	A	A	W	A	NA	W	A	W	A	A	W	W	NA	A	A	A	W	W	W	A	W	A	W	A	A	A	W	W	A	W	A	W	A	A	W	A	W	A
ChrI	33.5	W	A	A	W	W	A	A	W	A	A	A	A	W	A	A	W	A	W	A	A	W	W	W	A	A	A	W	W	W	A	W	A	W	A	A	A	W	W	A	W	A	W	A	A	W	A	W	A
ChrI	33.6	W	A	A	W	W	A	A	W	A	A	A	A	W	A	A	W	A	W	A	A	W	W	NA	A	A	A	W	W	W	A	W	A	W	A	A	A	W	W	A	W	A	W	A	A	W	A	W	A
ChrI	33.7	W	A	A	W	W	A	A	W	A	A	A	A	W	A	A	W	A	W	A	A	W	W	W	A	A	A	W	W	W	A	W	A	W	A	A	A	W	W	A	W	A	W	A	A	W	A	W	A
ChrI	33.8	W	A	A	W	W	A	A	W	A	A	A	A	W	A	A	W	A	W	A	A	W	W	W	A	A	A	W	W	W	A	W	A	W	A	A	A	W	W	A	W	A	W	A	A	W	A	W	A
ChrI	33.9	W	A	A	W	W	A	A	W	A	A	A	A	W	A	A	W	A	W	A	A	W	W	W	A	A	A	W	W	W	A	W	A	W	A	A	A	W	W	A	W	A	W	A	A	W	A	W	A
ChrI	34	W	A	A	W	W	A	A	W	A	A	A	A	W	A	A	W	A	W	A	A	W	W	W	A	A	A	W	W	W	A	W	A	W	A	A	A	W	W	A	W	A	W	A	A	W	A	W	A
ChrI	34.1	W	A	A	W	W	A	A	W	A	A	A	A	W	A	A	W	A	W	A	A	W	W	NA	A	A	A	W	W	W	A	W	A	W	A	A	A	W	W	A	W	A	W	A	A	W	A	W	A
ChrI	34.2	W	A	A	W	W	A	A	W	A	A	A	A	W	A	A	W	A	W	A	A	W	W	W	A	A	A	W	W	W	A	W	A	W	A	A	A	W	W	A	W	A	W	A	A	W	A	W	A
ChrI	34.3	W	A	A	W	W	A	A	W	A	A	A	A	W	A	A	W	A	W	A	A	W	W	W	A	A	A	W	W	W	A	W	A	W	A	A	A	W	W	A	W	A	W	A	A	W	NA	W	A
ChrI	34.4	W	A	A	W	W	A	A	W	A	A	A	A	W	A	A	W	A	W	A	A	W	W	W	A	A	A	W	W	W	A	W	A	W	NA	A	A	W	W	A	W	A	W	A	A	W	W	W	A
ChrI	34.5	W	A	A	W	W	A	A	W	A	A	A	A	W	A	A	W	A	W	A	A	W	W	W	A	A	A	W	W	W	A	W	A	W	A	A	A	W	W	A	W	A	W	A	A	W	W	W	A
ChrI	34.6	W	A	A	W	W	A	A	W	A	A	A	A	W	A	A	W	A	W	A	A	W	W	W	A	A	A	W	W	W	A	W	A	W	A	A	A	W	W	A	W	A	W	A	A	W	W	W	A
ChrI	34.7	W	A	A	W	W	A	NA	W	A	W	A	A	W	A	A	W	A	W	A	NA	W	W	NA	A	A	A	W	W	W	A	NA	A	W	A	A	A	W	NA	A	W	A	W	A	A	W	W	W	A
ChrI	34.8	W	A	A	A	W	A	A	W	A	W	A	A	W	A	A	W	A	W	A	A	W	W	W	A	A	A	W	W	W	A	W	A	W	A	A	A	W	W	A	W	A	W	A	A	W	W	W	A
ChrI	34.9	W	A	A	A	W	A	A	W	A	W	A	A	W	A	NA	W	A	W	A	A	W	W	W	A	A	A	W	W	W	A	W	A	W	A	A	A	W	W	A	W	A	W	A	A	W	W	W	A
ChrI	35	W	A	A	A	W	A	A	W	A	W	A	A	W	A	A	W	A	W	A	A	W	W	W	A	A	A	W	W	W	A	W	A	W	A	A	A	W	W	A	W	A	W	A	A	W	W	W	A
ChrI	35.1	W	A	A	A	W	A	A	W	A	W	A	A	W	A	A	W	A	W	A	A	W	W	W	A	A	A	W	W	W	A	W	A	W	A	A	A	W	W	A	W	A	W	A	A	W	W	W	A
ChrI	35.2	W	A	A	A	W	A	NA	W	A	W	A	A	W	A	A	W	A	W	A	A	W	W	NA	A	A	A	W	W	W	A	W	A	W	A	A	A	W	W	A	W	A	W	A	A	W	W	W	A
ChrI	35.3	W	A	A	A	W	A	A	W	A	W	A	A	W	A	A	A	A	W	A	A	NA	W	NA	A	A	A	W	W	W	A	W	A	W	A	A	A	W	W	A	W	A	W	A	A	W	W	W	A
ChrI	35.4	W	A	A	A	W	A	A	W	A	W	A	A	W	A	A	A	A	W	A	A	W	W	NA	A	A	A	W	W	W	A	W	A	W	A	A	A	W	W	A	W	A	W	A	A	W	W	W	A
ChrI	35.5	W	A	A	A	W	A	A	W	A	W	A	A	W	A	A	A	A	W	A	A	W	W	W	A	A	A	W	W	W	A	W	A	W	A	A	A	W	W	A	W	A	W	A	A	W	W	W	A
ChrI	35.6	W	A	A	A	W	A	A	W	A	W	A	A	W	A	A	A	A	W	A	A	W	W	W	A	A	A	W	W	W	A	W	A	W	A	A	A	W	W	A	W	A	W	A	A	W	W	W	A
ChrI	35.7	W	A	A	A	W	A	A	W	A	W	A	A	W	A	A	A	A	W	A	A	W	W	W	A	A	A	W	W	W	A	W	A	NA	A	A	A	W	W	A	W	A	W	NA	A	W	W	W	A
ChrI	35.8	W	A	A	A	NA	A	NA	W	A	W	A	A	W	A	A	A	A	W	A	A	W	W	NA	A	A	A	W	W	W	A	W	A	W	A	A	A	W	W	A	W	A	W	W	A	W	W	W	A
ChrI	35.9	W	A	A	A	NA	A	A	W	A	W	A	A	W	A	A	A	A	W	A	A	W	W	W	A	A	A	W	W	W	A	W	A	W	A	A	A	W	W	A	W	A	W	W	A	W	W	W	A
ChrI	36.1	W	A	A	A	W	A	A	W	A	W	A	A	W	A	A	A	A	W	A	A	W	W	W	A	A	A	W	W	W	A	W	A	W	A	A	W	W	W	A	W	A	W	W	A	W	W	W	A
ChrI	36.2	W	A	A	A	W	A	A	W	A	W	A	A	W	A	A	A	A	W	A	A	W	W	W	A	A	A	W	W	W	A	W	A	W	A	A	W	W	W	A	W	A	W	W	A	W	W	W	A
ChrI	36.3	W	A	A	A	W	A	A	W	A	W	A	A	W	A	A	A	A	W	A	A	W	W	W	A	A	A	W	W	W	A	W	A	W	A	A	W	W	W	A	W	A	W	W	A	W	W	W	A
ChrI	36.4	W	A	A	A	W	A	A	W	A	W	A	A	W	A	A	A	NA	W	A	A	W	W	W	A	A	A	W	W	W	A	W	A	W	A	A	W	W	W	A	W	A	W	W	A	W	W	W	A
ChrI	36.5	W	A	A	A	W	A	A	W	A	W	A	A	W	A	A	A	A	W	A	A	W	W	W	A	A	A	W	W	W	A	W	A	NA	A	A	W	W	W	A	W	A	W	W	A	W	W	W	A
ChrI	36.6	W	A	A	A	W	A	A	W	A	W	A	A	W	A	A	A	A	W	A	A	NA	W	W	A	A	A	W	W	W	A	W	A	W	A	A	W	W	W	A	W	A	W	W	A	W	W	NA	A
ChrI	36.7	W	A	A	A	W	A	A	W	A	W	A	A	W	A	A	A	A	NA	A	A	W	W	W	A	A	A	NA	W	W	A	W	A	W	A	A	W	W	W	A	W	A	W	W	A	W	W	A	A
ChrI	37	W	A	A	A	NA	A	A	W	A	W	A	A	W	A	A	A	A	NA	A	A	W	W	W	A	A	A	W	W	W	A	W	A	NA	A	A	W	W	W	A	W	A	W	W	A	W	W	A	A
ChrI	37.3	W	A	A	A	W	A	A	W	A	W	A	A	W	A	A	A	A	W	A	A	W	W	W	A	A	A	W	W	W	A	W	A	W	A	A	W	W	W	A	W	A	W	W	A	W	W	A	A
ChrI	37.4	W	A	A	A	W	A	A	W	A	W	A	A	W	A	A	A	A	W	A	A	W	W	W	A	A	A	W	W	W	A	NA	A	W	A	A	W	W	W	A	W	A	W	W	A	W	W	A	A
ChrI	37.5	W	A	A	A	W	A	NA	W	A	W	A	A	W	A	A	A	A	W	A	A	W	W	W	A	A	A	W	W	W	A	W	A	W	A	A	W	W	W	A	W	A	W	W	A	W	W	A	A
ChrI	37.6	W	A	A	A	W	A	A	W	A	W	A	A	W	A	A	A	A	NA	A	A	W	W	W	A	A	A	W	W	W	A	W	A	W	A	A	W	W	W	A	W	A	W	W	A	W	W	A	A
ChrI	37.7	W	A	A	A	W	A	A	W	A	W	A	A	W	A	A	A	A	W	A	A	W	W	W	A	A	A	W	W	W	A	W	A	W	A	A	W	W	W	A	W	A	W	W	A	W	W	A	A
ChrI	37.8	W	A	A	A	W	A	A	W	A	W	A	A	W	A	A	A	A	NA	A	A	W	W	W	A	A	NA	W	W	W	A	W	A	W	A	A	W	W	W	A	W	A	W	W	A	W	W	A	A
ChrI	37.9	W	A	A	A	W	A	A	W	A	W	A	A	W	A	A	A	A	W	A	A	W	W	W	A	A	W	W	W	W	A	W	A	NA	A	A	W	W	W	A	W	A	W	W	A	W	W	A	A
ChrI	38	W	A	A	A	W	A	A	W	A	W	A	A	W	A	A	A	A	W	A	A	W	W	W	A	A	W	W	W	W	A	W	A	NA	A	A	W	W	W	A	W	A	W	W	A	W	W	A	A
ChrI	38.1	W	A	A	A	W	A	A	W	A	W	A	A	W	A	A	A	A	W	A	A	W	W	W	A	A	W	W	W	W	A	W	A	W	A	A	W	W	W	A	W	A	W	W	A	W	W	A	A
ChrI	38.2	W	A	A	A	NA	A	A	W	A	W	A	A	W	A	A	A	A	NA	A	A	W	W	W	A	A	W	W	W	W	A	W	A	W	A	A	W	W	W	A	W	A	W	W	A	W	W	A	A
ChrI	38.4	W	A	A	A	W	A	A	W	A	W	A	A	W	A	A	A	A	W	A	A	W	W	W	A	A	W	W	W	W	A	W	A	NA	A	A	W	W	W	A	W	A	W	W	A	W	W	A	A
ChrI	38.5	W	A	A	A	W	A	A	W	A	W	A	A	W	A	A	A	A	W	A	A	W	W	W	A	A	W	W	W	W	A	W	A	NA	A	A	W	W	W	A	W	A	W	W	A	W	W	A	A
ChrI	38.6	W	A	A	A	W	A	A	W	A	W	A	A	W	A	A	A	A	W	A	A	W	W	W	A	A	W	W	W	W	A	W	A	W	A	A	W	W	W	A	W	A	W	W	A	W	W	A	A
ChrI	38.8	W	A	A	A	W	A	A	W	A	W	A	A	W	A	A	A	A	W	A	A	W	W	W	A	A	W	W	W	W	A	W	A	W	A	A	W	W	W	A	W	A	W	W	A	W	W	A	A
ChrI	38.9	W	A	A	A	W	A	A	W	A	W	A	A	W	A	A	A	A	W	A	A	W	W	W	A	A	W	W	W	W	A	W	A	W	A	A	W	W	W	A	W	A	W	W	A	W	W	A	A
ChrI	39.1	W	A	A	A	W	A	A	W	A	W	A	A	W	NA	A	NA	A	W	A	A	W	W	W	A	A	W	W	W	W	A	W	A	W	NA	A	W	W	W	A	W	A	W	W	A	W	W	A	A
ChrI	39.2	W	A	A	A	NA	A	NA	W	A	W	A	A	W	A	A	A	A	W	A	A	W	W	W	A	A	W	W	W	W	A	W	A	W	A	A	W	W	W	A	W	A	W	W	A	W	W	A	A
ChrI	39.3	W	A	A	A	NA	A	NA	W	A	W	A	A	W	A	A	A	A	W	A	A	W	W	W	A	A	W	W	W	W	A	W	A	NA	A	A	W	W	W	A	W	A	W	W	A	W	W	A	A
ChrI	39.4	W	A	A	A	W	A	A	W	A	W	A	A	W	A	A	A	A	W	A	A	W	W	W	A	A	W	W	W	W	A	W	A	W	A	A	W	W	W	A	W	A	W	W	A	W	W	A	A
ChrI	39.5	W	A	A	A	W	A	NA	W	A	W	A	A	W	A	A	A	A	W	A	A	W	W	W	A	A	W	W	W	W	A	W	A	W	NA	A	W	W	W	A	W	A	W	W	A	W	W	A	A
ChrII	0.1	A	W	W	A	W	A	A	A	W	W	W	A	A	W	W	W	A	A	W	A	A	A	A	A	A	A	A	A	W	W	A	W	W	A	A	NA	A	A	W	W	A	W	A	W	W	W	W	A
ChrII	0.2	A	W	W	A	W	A	A	A	W	W	W	A	A	W	W	W	A	A	W	A	A	A	A	A	NA	A	A	A	W	W	A	W	W	NA	A	W	A	A	W	W	A	NA	A	W	W	W	W	A
ChrII	0.3	A	W	W	A	W	A	A	A	W	W	W	A	A	W	W	W	A	A	NA	A	A	A	A	A	A	A	A	A	NA	W	A	W	NA	A	A	NA	A	A	W	NA	A	NA	A	W	W	W	W	A
ChrII	0.5	A	W	W	A	W	A	A	A	W	W	W	A	A	W	W	W	A	A	NA	A	A	A	A	A	A	A	A	A	NA	W	A	W	NA	A	A	NA	A	A	W	W	A	NA	A	W	W	W	W	A
ChrII	0.6	A	W	W	A	W	A	A	A	W	W	W	A	A	W	W	W	A	A	W	A	A	A	A	A	A	A	A	A	W	W	A	W	NA	A	A	W	A	A	W	W	A	W	A	W	W	W	W	A
ChrII	0.7	A	W	W	A	W	A	A	A	W	W	W	A	A	W	W	W	A	A	NA	A	A	A	A	A	A	A	A	A	W	W	A	W	NA	A	A	NA	A	A	W	NA	A	W	A	W	W	W	W	A
ChrII	0.8	A	W	W	A	W	A	A	A	W	W	W	A	A	W	W	W	A	A	NA	A	A	A	A	A	A	A	A	A	NA	W	A	W	NA	A	A	W	NA	A	W	NA	A	NA	A	W	W	W	W	A
ChrII	0.9	A	W	W	A	W	A	A	A	W	W	W	A	A	W	W	W	A	NA	NA	A	A	A	A	A	A	A	A	A	W	W	A	W	NA	A	A	W	A	A	W	W	A	W	A	W	W	W	W	A
ChrII	1	A	W	W	A	W	A	A	A	W	W	W	A	A	W	W	W	A	W	W	A	A	A	NA	A	A	A	A	A	W	W	A	W	W	A	A	W	A	A	W	W	A	W	A	W	W	W	W	A
ChrII	1.1	A	W	W	A	W	A	A	A	W	W	W	A	A	W	W	W	A	W	W	A	A	A	A	A	A	A	A	A	W	W	A	W	NA	A	A	NA	A	A	W	W	A	W	A	W	W	W	W	A
ChrII	1.2	A	W	W	A	W	A	A	A	W	W	W	A	A	W	W	W	A	W	W	A	NA	A	A	A	A	A	A	A	W	W	A	W	W	A	A	W	A	A	W	W	A	W	A	W	W	W	W	A
ChrII	1.3	A	W	W	A	W	A	A	A	W	W	W	A	A	W	W	W	A	W	NA	A	A	A	A	A	A	A	A	A	NA	W	A	W	W	A	A	NA	A	A	W	W	A	W	A	W	W	W	W	A
ChrII	1.4	A	W	W	A	W	A	A	A	W	W	W	A	A	W	W	W	A	W	W	A	A	A	A	A	A	A	A	A	W	W	A	W	W	A	A	W	A	A	W	W	A	W	A	W	W	W	W	A
ChrII	1.5	A	W	W	A	W	A	A	A	W	W	W	A	A	W	W	W	A	W	W	A	A	A	A	A	A	A	A	A	W	W	A	W	NA	A	A	W	A	A	W	W	A	W	A	W	W	W	W	A
ChrII	1.6	A	W	W	A	W	A	A	A	W	W	W	A	A	W	W	W	A	W	W	A	A	A	A	A	A	A	A	A	W	W	A	W	NA	A	A	NA	A	A	W	W	A	W	A	W	W	W	W	A
ChrII	1.7	A	W	W	A	W	A	A	A	W	W	W	A	A	W	W	W	A	W	NA	A	A	A	A	A	A	A	A	A	NA	W	A	W	NA	A	A	NA	NA	A	W	NA	A	W	A	W	W	W	W	A
ChrII	1.8	A	W	W	A	W	A	A	A	W	W	W	A	A	W	W	W	A	W	NA	A	A	A	A	A	A	A	A	A	NA	NA	A	W	NA	A	A	NA	A	A	W	NA	A	W	A	W	W	W	W	A
ChrII	1.9	A	W	W	A	W	A	A	A	W	W	W	A	A	W	W	W	A	W	W	A	A	A	A	A	A	A	A	A	W	W	A	W	W	A	A	W	A	A	W	W	A	W	A	W	W	W	W	A
ChrII	2	A	W	W	A	W	A	A	A	W	W	W	A	A	W	W	W	NA	W	W	A	A	A	A	A	A	A	A	A	NA	W	A	W	NA	A	A	NA	A	A	W	NA	A	NA	A	W	W	W	W	A
ChrII	2.1	A	W	W	A	W	A	A	A	W	W	W	A	A	W	W	W	A	W	W	A	A	A	A	A	A	A	A	A	W	W	A	W	W	A	A	W	A	A	W	W	A	W	A	W	W	W	W	A
ChrII	2.2	A	W	W	A	W	A	A	A	W	W	W	NA	A	W	W	W	A	W	W	A	A	A	A	A	A	A	A	A	W	W	A	W	W	A	A	NA	A	A	W	W	A	W	A	W	W	W	W	NA
ChrII	2.3	A	W	W	A	W	A	A	A	W	W	W	A	A	W	W	W	NA	W	W	A	A	A	A	A	A	A	A	A	W	W	A	W	NA	A	A	NA	A	A	W	NA	A	W	A	W	W	W	W	A
ChrII	2.5	A	W	W	A	W	A	A	A	W	W	W	A	A	W	W	W	A	W	W	NA	A	A	A	A	A	NA	A	A	W	W	A	W	W	A	A	W	A	A	W	W	A	W	A	W	W	W	W	A
ChrII	2.6	A	W	W	A	W	A	A	A	W	W	W	A	A	W	W	W	A	W	W	A	A	A	A	A	A	A	A	A	W	W	A	W	NA	A	A	NA	A	A	W	W	A	NA	A	W	W	W	W	A
ChrII	2.7	A	W	W	A	W	A	A	A	W	W	W	A	A	W	W	W	A	W	W	A	A	A	A	A	A	A	A	A	W	W	A	W	W	A	A	W	A	A	W	W	A	W	A	W	W	W	W	A
ChrII	2.8	A	W	W	A	W	A	A	A	W	W	W	A	A	W	W	W	A	W	W	A	A	A	A	A	A	A	A	A	W	W	A	W	NA	A	A	W	A	A	W	NA	A	W	A	W	W	W	W	A
ChrII	3	A	W	W	A	W	A	A	A	W	W	W	A	A	W	W	W	A	W	W	A	A	A	A	A	A	A	A	A	W	W	A	W	NA	A	A	W	A	A	W	W	A	W	A	W	W	W	W	A
ChrII	3.1	A	W	W	A	W	A	A	A	W	W	W	A	A	W	W	W	A	W	W	A	A	A	A	A	A	A	A	A	W	W	A	W	NA	A	A	W	A	A	W	W	A	W	A	W	W	W	W	A
ChrII	3.2	A	W	W	A	W	A	NA	A	W	W	W	A	A	W	W	W	NA	W	W	A	NA	A	A	A	NA	A	A	A	W	W	A	W	NA	NA	A	NA	A	A	W	NA	A	W	A	W	W	W	W	A
ChrII	3.3	A	W	W	A	W	A	A	A	W	W	W	A	A	W	W	W	A	W	W	A	A	A	A	A	A	A	A	A	W	W	A	W	W	A	A	W	A	A	W	A	A	W	A	W	W	W	W	A
ChrII	3.4	A	W	W	A	W	A	A	A	W	W	W	A	A	W	W	W	A	W	W	A	A	A	A	A	A	A	A	A	W	W	A	W	NA	A	A	W	A	A	W	A	A	W	A	W	W	W	W	A
ChrII	3.5	A	W	W	A	A	A	A	A	W	W	W	A	A	W	W	W	A	W	W	A	A	A	A	A	A	A	A	A	W	W	A	W	W	A	A	NA	A	A	W	A	A	W	A	W	W	W	W	A
ChrII	3.6	A	W	W	A	A	A	A	A	W	W	W	A	A	W	W	W	A	W	NA	A	A	A	A	A	A	A	A	A	W	W	A	W	NA	A	A	NA	A	A	W	A	A	W	A	W	W	W	W	A
ChrII	3.7	W	W	W	A	A	A	A	A	W	W	W	A	A	W	W	W	A	W	W	A	A	A	A	A	A	A	A	A	NA	W	A	W	W	A	A	W	A	A	W	A	A	W	A	W	W	W	W	A
ChrII	3.8	W	W	W	A	A	A	A	A	W	W	W	A	A	W	W	W	A	W	NA	A	A	A	A	A	A	A	A	A	W	W	A	W	NA	A	A	W	A	A	W	A	A	W	A	W	W	W	W	A
ChrII	3.9	W	W	W	A	A	A	A	A	W	W	W	A	A	W	W	W	A	W	NA	A	A	A	A	A	A	A	A	A	NA	NA	A	W	NA	NA	A	NA	A	A	W	A	A	W	A	W	W	W	W	A
ChrII	4	W	W	W	A	A	A	A	A	W	W	W	A	A	W	W	W	A	W	NA	A	A	A	A	A	A	A	A	A	NA	W	A	W	NA	A	A	NA	A	A	W	A	A	W	A	W	W	W	W	A
ChrII	4.1	W	W	W	A	A	A	A	A	W	W	W	A	A	W	W	W	A	W	W	A	A	A	A	A	A	A	A	A	NA	W	A	W	W	A	A	NA	A	A	W	A	A	W	A	W	W	W	W	A
ChrII	4.2	W	W	W	A	A	A	A	A	W	W	W	A	A	W	W	W	A	W	W	A	A	A	A	A	A	A	A	A	W	W	A	W	W	A	A	W	A	A	W	A	A	W	A	W	W	W	A	A
ChrII	4.3	W	W	W	A	A	A	A	A	W	W	W	A	A	W	W	W	A	W	W	A	A	A	A	A	A	A	A	A	W	W	A	W	W	A	A	W	A	A	W	A	A	W	A	W	W	W	A	A
ChrII	4.4	W	W	W	A	A	A	A	A	W	W	W	A	A	W	W	W	A	W	W	A	A	A	A	A	A	A	A	A	W	W	A	W	NA	A	A	NA	A	A	W	A	A	W	A	W	W	W	A	A
ChrII	4.5	W	W	W	A	A	A	A	A	W	W	W	A	A	W	W	W	A	W	W	A	A	A	A	A	A	A	A	A	W	W	A	W	NA	A	A	W	A	A	W	A	A	W	A	W	W	W	A	A
ChrII	4.6	W	W	W	A	A	A	A	A	W	W	W	A	A	W	W	W	A	W	W	A	A	A	A	A	A	A	A	A	W	W	A	W	NA	A	A	W	A	A	W	A	A	W	A	W	W	W	A	A
ChrII	4.7	W	W	W	A	A	A	A	A	W	W	W	A	A	W	W	W	A	W	W	A	A	A	A	A	A	A	A	A	NA	W	A	W	NA	A	A	NA	A	A	W	A	A	W	A	W	W	W	A	A
ChrII	4.8	W	W	W	A	A	A	A	A	W	W	W	A	A	W	W	W	A	W	W	A	A	A	A	A	A	A	A	A	W	W	A	W	NA	A	A	W	A	A	W	A	A	W	A	W	W	W	A	A
ChrII	4.9	W	W	W	A	A	A	A	A	W	W	W	A	A	W	W	W	A	W	W	A	A	A	A	A	A	A	A	A	NA	W	A	W	W	A	A	W	A	A	W	A	A	W	A	W	W	W	A	A
ChrII	5	W	W	W	A	A	A	A	A	W	W	W	A	A	W	W	W	A	W	W	A	A	A	A	A	A	A	NA	A	W	W	A	W	W	A	A	W	A	A	W	A	A	W	A	W	W	W	A	A
ChrII	5.1	W	W	W	A	A	A	A	A	W	W	W	A	A	W	W	W	A	W	NA	A	A	A	A	A	A	NA	A	A	NA	NA	A	W	W	A	A	NA	A	A	W	A	A	W	A	W	W	W	A	A
ChrII	5.2	W	W	W	A	A	A	A	A	W	W	W	A	A	W	W	W	A	W	W	A	A	A	A	A	A	A	A	A	W	W	A	W	NA	A	A	W	A	A	W	A	A	W	A	W	W	W	A	A
ChrII	5.3	W	W	W	A	A	A	A	A	W	W	W	A	A	W	W	W	A	W	W	NA	A	A	A	A	A	A	A	A	W	W	A	W	W	A	A	W	A	A	W	A	A	W	A	W	W	W	A	A
ChrII	5.4	W	W	W	A	A	A	A	A	W	W	W	A	A	W	W	W	A	W	NA	A	A	A	A	A	A	A	A	A	NA	W	A	W	W	A	A	NA	A	A	W	A	A	W	A	W	W	W	A	A
ChrII	5.5	W	W	W	A	A	A	A	A	W	W	W	A	A	W	W	W	A	W	W	A	A	A	A	A	A	A	A	A	W	W	A	W	NA	A	A	W	A	A	W	A	A	W	A	W	W	W	A	A
ChrII	5.6	W	W	W	A	A	A	A	A	W	W	W	A	A	W	W	W	A	W	W	A	A	A	A	A	A	A	A	A	W	W	A	W	W	A	A	W	A	A	W	A	A	W	A	W	W	W	A	A
ChrII	5.8	W	W	W	A	A	A	A	A	W	W	W	A	A	W	W	W	A	W	NA	A	A	A	A	A	A	A	A	A	W	NA	A	W	NA	A	A	NA	A	A	W	A	A	W	A	W	W	W	A	A
ChrII	5.9	W	W	W	A	A	A	A	A	W	W	W	A	A	W	W	W	A	W	W	A	A	A	A	A	A	A	A	A	NA	W	A	W	NA	A	A	W	A	A	W	A	A	W	A	W	W	W	A	A
ChrII	6	W	W	W	A	A	A	A	A	W	W	W	A	A	W	W	W	A	W	W	A	A	A	A	A	A	A	A	A	W	W	A	W	W	A	A	NA	A	A	NA	A	A	W	A	W	W	W	A	A
ChrII	6.1	W	W	W	A	A	A	A	A	W	W	W	A	A	W	W	W	NA	W	NA	A	A	A	A	A	A	A	A	A	NA	W	A	W	NA	A	A	NA	NA	A	A	A	A	W	A	W	W	W	A	A
ChrII	6.2	W	W	W	A	A	A	NA	A	W	W	W	A	NA	W	W	W	A	W	W	NA	A	A	A	A	A	A	A	A	W	W	A	W	W	A	NA	W	A	A	A	A	A	W	A	W	W	W	A	A
ChrII	6.3	W	W	W	A	A	A	A	A	W	W	W	A	A	W	W	W	A	W	W	A	A	A	A	A	A	A	A	A	W	W	A	NA	NA	A	A	W	A	A	A	A	A	W	A	W	W	W	A	A
ChrII	6.4	W	W	W	A	A	A	A	A	W	W	W	A	A	W	W	W	A	W	W	A	A	A	A	A	A	A	A	A	W	W	A	W	W	A	A	W	A	A	A	A	A	W	A	W	W	W	A	A
ChrII	6.5	W	W	W	A	A	A	A	A	W	W	W	A	A	W	W	W	A	W	W	A	A	A	A	A	A	A	A	A	NA	W	A	W	W	A	A	NA	A	A	A	A	A	W	A	W	W	W	A	A
ChrII	6.6	W	W	W	A	A	A	A	A	W	W	W	A	A	W	W	W	A	W	W	A	A	A	A	A	A	NA	A	A	W	W	A	W	W	A	A	W	A	A	A	A	A	W	A	W	NA	W	A	A
ChrII	6.7	W	W	W	A	A	A	A	A	W	W	W	A	A	W	W	W	A	W	W	A	A	A	A	A	A	A	A	A	W	W	A	W	W	A	A	W	A	A	A	A	A	W	A	W	A	W	A	A
ChrII	6.8	W	W	W	A	A	A	A	A	W	W	W	A	A	W	W	W	A	W	W	A	A	A	A	A	A	A	A	A	W	W	A	W	W	A	A	W	A	A	A	A	A	W	A	W	A	W	A	A
ChrII	6.9	W	W	W	A	A	A	A	A	W	W	W	A	A	W	W	W	A	W	W	A	A	A	A	A	A	A	A	A	W	A	A	W	W	A	A	NA	A	A	A	A	A	W	A	W	A	W	A	A
ChrII	7	W	W	W	A	A	A	A	A	W	W	W	A	A	W	W	W	A	W	NA	A	A	A	A	A	A	A	A	A	W	A	A	NA	W	A	A	NA	A	A	A	A	A	W	A	W	A	W	A	A
ChrII	7.1	W	W	W	A	A	A	A	A	W	W	W	A	A	W	W	W	A	W	W	A	A	A	A	A	A	A	A	A	W	A	A	W	W	A	A	W	A	A	A	A	A	W	A	W	A	W	A	A
ChrII	7.2	W	W	W	A	A	A	A	A	W	W	W	A	A	W	W	W	A	W	NA	A	A	A	A	A	A	A	A	A	W	A	A	W	W	A	A	NA	A	A	A	A	A	W	A	W	A	W	A	A
ChrII	7.3	W	W	W	A	A	A	A	A	W	W	W	A	A	W	W	W	A	W	NA	A	A	A	A	A	A	A	A	A	NA	A	A	W	W	NA	A	NA	A	A	A	A	A	W	A	W	A	W	A	A
ChrII	7.4	W	W	W	A	A	A	A	A	W	W	W	A	A	W	W	W	A	W	NA	A	A	A	A	A	A	A	A	A	NA	A	A	W	NA	A	A	NA	A	A	A	A	A	W	A	W	A	W	A	A
ChrII	7.5	W	W	W	A	A	A	A	A	W	W	W	A	A	W	W	W	A	W	W	A	A	A	A	A	A	A	A	A	NA	A	A	W	W	A	A	W	A	A	A	A	A	W	A	W	A	W	A	A
ChrII	7.6	W	W	W	A	A	A	A	A	W	W	W	A	A	W	W	W	A	W	W	A	A	A	A	A	A	A	A	A	NA	A	A	NA	W	A	A	W	A	A	A	A	A	W	A	W	A	W	A	A
ChrII	7.7	W	W	W	A	A	A	A	NA	W	W	W	A	A	W	W	W	A	W	W	A	A	A	A	A	A	A	A	A	W	A	A	W	W	A	A	W	A	A	A	A	A	W	A	W	A	W	A	A
ChrII	7.8	W	W	W	A	A	A	A	A	W	W	W	A	A	W	W	W	A	W	W	A	A	A	A	A	A	A	A	A	NA	A	A	W	W	A	A	NA	A	A	A	A	A	W	A	W	A	W	A	A
ChrII	7.9	W	W	W	A	A	A	A	A	W	W	W	A	A	W	W	W	A	W	W	A	A	A	A	A	A	A	A	A	W	A	A	NA	W	A	A	NA	A	A	A	A	A	W	A	W	A	W	A	A
ChrII	8	W	W	W	A	A	A	A	A	W	W	W	A	A	W	W	W	A	W	W	A	A	A	A	A	A	A	A	A	W	A	A	W	W	A	A	W	A	A	A	A	A	W	A	W	A	W	A	A
ChrII	8.1	W	W	W	A	A	A	A	A	W	W	W	A	A	W	W	W	NA	W	W	A	A	A	A	A	A	A	A	A	W	A	A	W	W	A	A	NA	A	A	A	A	A	W	A	W	A	W	A	A
ChrII	8.2	W	W	W	A	A	A	A	A	W	W	W	A	A	W	W	W	A	W	W	A	A	A	A	A	A	A	A	A	NA	A	A	NA	W	A	A	NA	A	A	A	A	A	W	A	W	A	W	A	A
ChrII	8.3	W	W	W	A	A	A	A	A	W	W	W	A	A	W	W	W	A	W	W	A	A	A	A	A	A	A	A	A	NA	A	A	W	W	A	A	NA	A	A	A	A	A	W	A	W	A	W	A	A
ChrII	8.4	W	W	W	A	A	A	A	A	W	W	W	A	A	W	W	W	A	W	W	A	A	A	A	A	A	A	A	A	W	A	A	W	W	A	A	W	A	A	A	A	A	W	A	W	A	W	A	A
ChrII	8.5	W	W	W	A	A	A	A	A	W	W	W	A	A	W	W	W	A	W	W	A	A	A	A	A	A	A	A	A	W	A	A	W	W	A	A	W	A	A	A	A	A	W	A	W	A	W	A	A
ChrII	8.6	W	W	W	A	A	A	A	A	W	W	W	A	A	W	W	W	A	W	W	A	A	A	A	A	A	A	A	A	W	A	A	W	W	A	A	NA	A	A	A	A	A	W	A	W	A	W	A	A
ChrII	8.7	W	W	W	A	A	A	A	A	W	W	W	A	A	W	W	W	A	W	W	A	A	A	A	A	A	A	A	A	NA	A	A	W	W	W	A	W	A	A	A	A	A	W	A	W	A	W	A	A
ChrII	8.8	W	W	W	A	A	A	A	A	W	W	W	A	A	W	W	W	A	W	W	A	A	A	A	A	A	A	A	A	W	A	A	W	W	W	A	W	A	A	A	A	A	W	A	W	A	W	A	A
ChrII	8.9	W	W	W	A	A	A	A	A	W	W	W	A	A	W	W	W	A	W	W	A	A	A	A	A	A	A	A	A	NA	A	A	W	W	W	A	W	A	A	A	A	A	W	A	W	A	W	A	A
ChrII	9	W	W	W	A	A	A	A	A	W	W	W	A	A	W	W	W	A	W	W	A	A	A	A	A	A	A	A	A	W	A	A	W	W	W	A	NA	A	A	A	A	A	W	A	W	A	W	A	A
ChrII	9.1	W	W	W	A	A	A	A	A	W	W	W	A	A	W	W	W	A	W	NA	A	A	A	A	A	A	A	A	A	W	A	A	W	W	W	A	NA	A	A	A	A	A	W	A	W	A	W	A	A
ChrII	9.2	W	W	W	A	A	A	A	A	W	W	W	A	A	W	W	W	A	W	W	A	A	A	A	A	A	A	A	A	W	A	A	NA	W	W	A	W	A	A	A	A	A	W	A	W	A	W	A	A
ChrII	9.3	W	W	W	A	A	A	A	A	W	W	W	A	A	W	W	W	A	W	W	A	A	A	A	A	A	A	A	A	W	A	A	W	W	W	A	W	A	A	A	A	A	W	A	W	A	W	A	A
ChrII	9.4	W	W	W	A	A	A	A	A	W	W	W	A	A	W	W	W	A	W	W	A	A	A	A	A	A	A	A	A	W	A	A	W	W	W	A	W	A	A	A	A	A	W	A	W	A	W	A	A
ChrII	9.5	W	W	W	A	A	A	A	A	W	W	W	A	A	W	W	W	A	W	W	A	A	A	A	A	A	A	A	A	W	A	A	W	W	W	A	W	A	A	A	A	A	W	A	W	A	W	A	A
ChrII	9.6	W	W	W	A	A	A	A	A	W	W	W	A	A	W	W	W	A	W	W	A	A	A	A	A	A	A	A	A	W	A	A	W	W	W	A	W	A	A	A	A	A	W	A	W	A	W	A	A
ChrII	9.7	W	W	W	A	A	A	A	A	W	W	W	A	A	W	W	W	A	W	W	A	A	A	A	A	A	A	A	A	W	A	A	W	W	W	A	W	A	A	A	A	A	W	A	W	A	W	A	A
ChrII	9.8	W	W	W	A	A	A	A	A	W	W	W	A	A	W	W	W	A	W	W	A	NA	A	A	A	A	A	A	A	W	A	A	W	W	W	A	W	A	A	A	A	A	W	A	W	A	W	A	A
ChrII	9.9	W	W	W	A	A	A	A	A	W	W	W	A	A	W	W	W	A	W	W	A	A	A	A	A	NA	A	A	A	W	A	A	W	W	W	A	W	A	A	A	A	A	W	A	W	A	W	A	A
ChrII	10	W	W	W	A	A	A	A	A	W	W	W	A	A	W	W	W	A	W	W	A	NA	A	A	A	A	A	A	A	W	A	A	W	W	W	A	W	A	A	A	A	A	W	A	W	A	W	A	A
ChrII	10.1	W	W	W	A	A	A	A	A	W	W	W	A	A	W	W	W	A	W	W	A	A	A	A	A	A	A	A	A	W	A	A	W	W	W	A	W	A	A	A	A	A	W	A	W	A	W	A	A
ChrII	10.2	W	W	W	A	A	A	A	A	W	W	W	A	A	W	W	W	A	W	W	A	A	A	A	A	A	A	A	A	W	A	A	W	W	W	A	W	A	A	A	A	A	W	A	W	A	W	A	A
ChrII	10.3	W	W	W	A	A	A	A	A	W	W	W	A	A	W	W	W	A	W	W	A	A	A	A	A	A	A	A	A	W	A	A	W	W	W	A	NA	A	A	A	A	A	W	A	W	A	W	A	A
ChrII	10.4	W	W	W	A	A	A	A	A	W	W	W	A	A	W	W	W	NA	W	NA	A	A	A	A	A	A	NA	A	A	NA	A	A	NA	W	W	A	NA	A	A	A	A	A	W	A	W	A	W	A	A
ChrII	10.5	W	W	W	A	A	A	A	A	W	W	W	A	A	W	W	W	A	W	W	A	A	A	A	A	A	A	A	A	W	A	A	W	W	W	A	W	A	A	A	A	A	W	A	W	A	W	A	A
ChrII	10.6	W	W	W	A	A	A	A	A	W	W	W	A	A	W	W	W	A	W	W	A	A	A	A	A	A	A	A	A	W	A	A	W	W	W	A	W	A	A	A	A	A	W	A	W	A	W	A	A
ChrII	10.7	W	W	W	A	A	A	A	A	W	W	W	A	A	W	W	W	A	W	W	A	A	A	A	A	A	A	A	A	W	A	A	W	W	W	A	W	A	A	A	A	A	W	A	W	A	W	A	A
ChrII	10.8	W	W	W	A	A	A	A	A	W	W	W	A	A	NA	W	W	A	W	NA	A	A	A	A	A	A	A	A	A	NA	A	A	W	W	W	A	NA	NA	A	A	A	A	W	A	W	A	W	A	A
ChrII	10.9	W	W	W	A	A	A	A	A	W	W	W	A	A	W	W	W	A	W	NA	A	A	A	A	A	A	A	A	A	NA	A	A	NA	W	W	A	NA	A	A	A	A	A	W	A	W	A	W	A	A
ChrII	11.1	W	W	W	A	A	A	A	A	W	W	W	A	A	W	W	W	A	W	W	A	A	A	A	A	A	NA	A	A	W	A	A	NA	W	W	A	NA	A	A	A	A	A	W	A	W	A	W	A	A
ChrII	11.2	W	W	W	A	A	A	A	A	W	W	W	A	A	W	W	W	A	W	W	A	A	A	A	A	A	A	NA	A	W	A	A	W	W	W	A	W	A	A	A	A	A	W	A	W	A	W	A	A
ChrII	11.3	W	W	W	A	A	NA	NA	A	W	W	W	NA	A	W	W	W	NA	W	W	A	A	A	A	A	NA	A	NA	A	W	A	A	W	NA	W	NA	NA	A	A	A	NA	A	W	A	W	NA	W	NA	NA
ChrII	11.4	W	W	W	A	A	A	A	A	W	W	W	A	A	W	W	W	A	W	W	NA	A	A	A	A	A	A	A	A	W	A	A	W	NA	W	A	W	A	A	A	A	A	W	A	W	A	W	A	A
ChrII	11.5	W	W	W	A	A	A	A	A	W	W	W	A	A	NA	W	W	A	W	NA	A	A	A	A	A	A	A	A	A	NA	A	A	NA	W	W	A	NA	A	A	A	A	A	W	A	W	A	W	A	A
ChrII	11.6	W	W	W	A	A	A	A	A	W	W	W	A	A	W	W	W	A	W	W	A	A	A	A	A	A	A	A	A	W	A	A	W	W	W	A	NA	A	A	A	A	A	W	A	W	A	W	A	A
ChrII	11.7	W	W	W	A	A	A	A	A	W	W	W	A	A	W	W	W	A	W	NA	A	A	A	A	A	A	A	A	A	W	A	A	W	W	W	A	NA	A	A	A	A	A	W	A	W	A	W	A	A
ChrII	11.8	W	W	W	A	A	A	A	A	W	W	W	A	A	W	W	W	A	W	W	A	A	A	A	A	A	A	A	A	W	A	A	W	W	W	A	W	A	A	A	A	A	W	A	W	A	W	A	A
ChrII	11.9	W	W	W	A	A	A	A	A	W	W	W	A	A	W	W	W	A	W	W	A	A	A	A	A	A	A	A	A	W	A	A	W	W	W	A	W	A	A	A	A	A	W	A	W	A	W	A	A
ChrII	12	W	W	W	A	A	A	A	A	W	W	W	A	A	W	W	W	A	W	NA	A	A	A	A	A	A	A	A	A	W	A	A	W	W	W	A	NA	A	A	A	A	A	W	A	W	A	W	A	A
ChrII	12.1	W	W	W	A	A	A	A	A	W	W	W	A	A	W	W	W	A	W	W	A	A	A	A	A	A	A	A	A	NA	A	A	W	W	W	A	NA	A	A	A	A	A	W	A	W	A	W	A	A
ChrII	12.2	W	W	W	A	A	A	A	A	W	W	W	A	A	W	W	W	A	W	W	A	A	A	A	A	A	A	A	NA	W	A	A	W	W	W	A	W	A	A	A	A	A	W	A	W	A	W	A	A
ChrII	12.3	W	W	W	A	A	A	A	A	W	W	W	A	A	W	W	W	A	W	W	NA	NA	A	NA	A	A	A	A	A	W	A	A	W	W	W	A	W	A	A	A	A	A	W	A	W	A	W	A	A
ChrII	12.4	W	W	W	A	A	A	A	A	W	W	W	A	A	W	W	W	A	W	W	A	A	A	A	A	A	A	A	A	W	A	A	W	W	W	A	W	A	A	A	A	A	W	A	W	A	W	A	A
ChrII	12.5	W	W	W	A	A	A	A	A	W	W	W	A	A	W	W	W	A	W	W	A	A	A	A	A	A	A	NA	A	W	A	A	W	W	W	A	W	A	A	A	A	A	W	A	W	A	W	A	A
ChrII	12.6	W	W	W	A	A	A	A	A	W	W	W	A	A	W	W	W	A	W	W	A	A	A	A	A	A	A	A	A	W	A	A	NA	W	W	A	NA	A	A	A	A	A	W	A	W	A	W	A	A
ChrII	12.7	W	W	W	A	A	A	A	A	W	W	W	A	A	W	W	W	NA	W	NA	A	A	A	A	A	A	NA	A	A	W	NA	A	NA	W	W	A	NA	A	A	A	A	A	W	A	W	A	W	A	A
ChrII	12.8	W	W	W	A	A	A	A	A	W	W	W	A	A	W	W	W	A	W	NA	A	A	A	A	A	A	A	A	A	NA	A	A	W	W	W	A	NA	A	A	A	A	A	W	A	W	A	W	A	A
ChrII	12.9	W	W	W	A	A	A	A	A	W	W	W	A	A	W	W	W	NA	W	W	A	A	A	A	A	A	A	A	A	NA	A	A	W	W	W	A	NA	A	A	A	A	A	W	A	W	A	W	A	A
ChrII	13	W	W	W	A	A	A	A	A	W	W	W	A	A	W	NA	W	A	W	NA	A	A	A	NA	A	A	A	A	A	W	A	A	W	NA	W	A	NA	A	A	A	A	A	W	A	W	A	W	A	A
ChrII	13.1	W	W	W	A	A	A	A	A	W	W	W	A	A	W	W	W	A	W	NA	A	A	A	A	A	A	A	A	A	NA	A	A	W	W	W	A	NA	A	A	A	A	A	W	A	W	A	W	A	A
ChrII	13.3	W	W	W	A	A	A	A	A	W	W	W	A	A	W	W	W	A	W	W	A	A	A	A	A	A	A	A	A	NA	A	A	NA	W	W	A	NA	A	A	A	A	A	W	A	W	A	W	A	A
ChrII	13.4	W	W	W	A	A	A	A	A	W	W	W	A	A	W	W	W	A	W	NA	A	A	A	A	A	A	A	A	A	NA	A	A	W	W	W	A	NA	A	A	A	A	A	W	A	W	A	W	A	A
ChrII	13.5	W	W	W	A	A	A	A	A	W	W	W	A	A	W	W	W	A	W	W	A	A	A	A	A	A	A	A	A	W	A	A	W	W	W	A	W	A	A	A	A	A	W	A	W	A	W	A	A
ChrII	13.6	W	W	W	A	A	A	A	A	W	W	W	A	A	W	W	W	A	W	W	A	A	A	A	A	A	A	A	A	W	A	A	W	W	W	A	W	A	A	A	A	A	W	A	W	A	W	A	A
ChrII	13.7	W	W	W	A	A	A	A	A	W	W	W	A	A	W	W	W	A	W	W	A	A	A	A	A	A	A	A	A	NA	A	A	W	W	W	A	NA	A	A	A	A	A	W	A	W	A	W	A	A
ChrII	13.8	W	W	W	A	A	A	A	A	W	W	W	A	A	W	W	W	A	W	W	A	A	A	A	A	A	A	A	A	W	A	A	W	W	W	A	NA	A	A	A	A	A	W	A	W	A	W	A	A
ChrII	13.9	W	W	W	A	A	A	A	A	W	W	W	A	A	W	W	W	A	W	W	A	A	A	A	A	A	A	A	A	W	A	A	NA	W	W	A	W	A	A	A	A	A	W	A	W	A	W	A	A
ChrII	14	W	W	W	A	A	A	A	A	W	W	W	A	A	W	W	W	A	W	NA	A	A	A	A	A	A	A	A	A	NA	A	A	NA	W	W	A	NA	A	A	A	A	A	W	A	W	A	W	A	A
ChrII	14.1	W	W	W	A	A	A	A	A	W	W	W	A	A	W	W	W	A	W	W	A	A	A	A	A	A	A	A	A	NA	A	A	W	W	W	A	NA	A	A	A	A	A	W	A	W	A	W	A	A
ChrII	14.2	W	W	W	A	A	A	A	A	W	W	W	A	A	W	W	W	A	W	W	A	A	A	A	A	A	A	A	A	W	A	A	W	W	W	A	W	A	A	A	A	A	W	A	W	A	W	A	A
ChrII	14.3	W	W	W	A	A	A	A	A	W	W	W	A	A	W	W	W	A	W	W	A	A	A	A	A	A	A	A	A	NA	A	A	NA	W	W	A	NA	A	A	A	A	A	W	A	W	A	W	A	A
ChrII	14.4	W	W	W	A	A	A	A	A	W	W	W	A	A	W	W	W	A	W	W	A	A	A	A	A	A	A	A	A	W	A	A	W	W	W	A	W	A	A	A	A	A	W	A	W	A	W	A	A
ChrII	14.5	W	W	W	A	A	A	A	A	W	W	W	A	A	W	W	W	A	W	W	A	A	A	A	A	A	A	A	A	W	A	A	W	W	W	A	W	A	A	A	A	A	W	A	W	A	W	A	A
ChrII	14.6	W	W	W	A	A	A	A	A	W	W	W	A	A	W	W	W	A	W	W	A	A	A	A	A	A	A	A	A	W	A	A	W	W	W	A	W	A	A	A	A	A	W	A	W	A	W	A	A
ChrII	14.7	W	W	W	A	A	A	A	A	W	W	W	A	A	W	W	W	NA	W	W	A	A	A	A	A	A	A	A	A	NA	A	A	NA	W	W	A	NA	NA	A	A	A	A	W	A	W	A	W	A	A
ChrII	14.8	W	W	W	A	A	A	A	A	W	W	W	A	A	W	W	W	A	W	NA	A	NA	A	A	A	A	A	A	A	W	A	A	W	W	W	A	NA	A	A	A	A	A	W	A	W	A	W	A	A
ChrII	14.9	W	W	W	A	A	A	A	A	W	W	W	A	A	W	W	W	A	W	W	A	A	A	A	A	A	A	A	A	NA	A	A	W	W	W	A	NA	A	A	A	A	A	W	A	W	A	W	A	A
ChrII	15	W	W	W	A	A	A	A	A	W	W	W	A	A	W	W	W	A	W	W	A	A	A	NA	A	A	A	A	A	NA	A	A	W	W	W	A	W	A	A	A	A	A	W	A	W	A	W	A	A
ChrII	15.1	W	W	W	A	A	A	A	A	W	W	W	A	A	W	W	W	A	W	W	A	A	A	A	A	A	A	A	A	W	A	A	W	W	W	A	W	A	A	A	A	A	W	A	W	A	W	A	A
ChrII	15.2	W	W	W	A	A	A	A	A	W	W	W	A	A	W	W	W	A	W	W	A	NA	A	A	A	A	A	A	A	W	A	A	W	W	W	A	W	A	A	A	A	A	W	A	W	A	W	A	A
ChrII	15.3	W	W	W	A	A	A	A	A	W	W	W	A	A	W	W	W	A	W	W	A	A	A	A	A	A	A	A	A	W	A	A	W	W	W	A	W	A	A	A	A	A	W	A	W	A	W	A	A
ChrII	15.4	W	W	W	A	A	A	A	A	W	W	W	A	A	W	W	W	A	W	W	A	A	A	A	A	A	A	A	A	NA	A	A	W	W	W	A	W	A	A	A	A	A	W	A	W	A	W	A	A
ChrII	15.5	W	W	W	A	A	A	A	A	W	W	W	A	A	W	W	W	A	W	W	A	A	A	A	A	A	A	A	A	W	A	A	W	W	W	A	W	A	A	A	A	A	W	A	W	A	W	A	A
ChrII	15.6	W	W	W	A	A	A	NA	A	W	W	W	A	A	W	W	W	A	W	W	A	A	A	A	A	A	A	A	A	W	A	A	W	W	W	A	W	A	A	A	A	A	W	A	W	A	W	A	A
ChrII	15.7	W	W	W	A	A	A	A	A	W	W	W	A	A	W	W	W	A	W	W	A	A	A	A	A	A	A	A	A	W	A	A	W	W	W	A	W	A	A	A	A	A	W	A	W	A	W	A	A
ChrII	15.8	W	W	W	A	A	A	A	A	W	W	W	A	A	W	W	W	A	W	W	A	A	A	A	A	A	A	A	A	W	A	A	W	W	W	A	W	A	A	A	A	A	W	A	W	A	W	A	A
ChrII	15.9	W	W	W	A	A	A	A	A	W	W	W	A	A	W	W	W	NA	W	W	A	A	A	A	A	A	A	A	A	W	A	A	W	W	W	A	W	A	A	A	A	A	W	A	W	A	W	A	A
ChrII	16	W	W	W	A	A	A	A	A	W	W	W	A	A	W	W	W	A	W	W	A	A	A	A	A	A	A	A	A	W	A	A	W	W	W	A	W	NA	A	A	A	A	W	A	W	A	W	A	A
ChrII	16.1	W	W	W	A	A	A	A	A	W	W	W	A	A	W	W	W	A	W	W	A	A	A	A	A	A	A	A	A	W	A	A	W	W	W	A	NA	A	A	A	A	A	W	A	W	A	W	A	A
ChrII	16.2	W	W	W	A	A	A	A	A	NA	W	W	A	A	W	NA	W	A	W	W	A	A	A	A	A	NA	A	A	A	W	A	A	W	W	W	A	W	A	A	A	A	A	W	A	W	A	W	A	A
ChrII	16.3	W	W	W	A	A	A	A	A	A	W	W	A	A	W	W	W	A	W	NA	A	A	A	A	A	W	A	A	A	W	A	A	NA	W	W	A	NA	A	A	A	A	A	W	A	W	A	W	A	A
ChrII	16.4	W	W	W	A	A	A	A	A	A	W	W	A	A	W	W	W	A	W	W	A	A	A	A	A	W	A	A	A	W	A	A	W	W	W	A	W	A	A	A	A	A	W	A	W	A	W	A	A
ChrII	16.5	W	W	W	A	A	A	A	A	A	NA	W	A	A	W	W	W	A	W	W	A	A	A	A	A	W	A	A	A	W	A	A	W	W	W	A	W	A	A	A	A	A	W	A	W	A	W	A	A
ChrII	16.6	W	W	W	A	A	A	A	A	A	W	W	A	A	W	W	W	A	W	W	A	A	A	A	A	W	A	A	A	W	A	A	W	W	W	A	W	A	A	A	A	A	W	A	W	A	W	A	A
ChrII	16.7	W	W	W	A	A	A	A	A	A	W	W	A	A	W	W	W	A	W	W	A	A	A	A	A	W	A	A	A	W	A	A	W	W	W	A	W	A	A	A	A	A	W	A	W	A	W	A	A
ChrII	16.8	W	W	W	A	A	NA	NA	NA	A	W	W	A	A	W	W	W	NA	W	NA	A	A	A	A	A	W	NA	A	A	W	NA	A	NA	W	W	A	NA	NA	A	A	NA	A	W	A	W	A	W	A	A
ChrII	16.9	W	W	W	A	A	A	A	A	A	NA	W	NA	A	W	W	W	A	W	NA	A	A	A	A	A	W	A	A	A	NA	A	A	W	W	W	A	NA	A	A	A	A	A	W	A	W	A	W	A	A
ChrII	17	W	W	W	A	A	A	A	A	A	W	W	W	A	W	W	W	A	W	W	A	A	A	A	A	W	A	A	A	W	A	A	W	W	W	A	W	A	A	A	A	A	W	A	W	A	W	A	A
ChrII	17.1	W	W	W	A	A	A	A	A	A	W	W	W	A	W	W	W	A	W	W	A	A	A	A	A	W	A	A	A	W	A	A	NA	W	W	A	NA	A	A	A	A	A	W	A	W	A	W	A	A
ChrII	17.2	W	W	W	A	A	A	A	A	A	W	W	W	A	W	NA	W	A	W	W	A	A	A	A	A	W	A	A	A	NA	A	A	NA	W	W	A	NA	A	A	A	A	A	W	A	W	A	W	A	A
ChrII	17.4	W	W	W	A	A	A	A	A	A	W	W	W	A	W	W	W	A	W	W	A	A	A	A	A	W	A	NA	A	A	A	A	W	W	W	A	W	A	A	A	A	A	W	A	W	A	W	A	W
ChrII	17.5	W	W	W	A	A	A	A	A	A	W	W	W	A	W	W	W	A	W	W	A	A	A	A	A	W	A	W	A	A	A	A	W	W	W	A	W	A	A	A	A	A	W	A	W	A	W	A	W
ChrII	17.6	W	W	W	A	A	A	A	A	A	W	W	W	A	NA	NA	W	A	W	W	A	A	A	A	A	W	A	W	A	A	A	A	W	W	W	A	NA	A	A	A	A	A	W	A	W	A	W	A	W
ChrII	17.7	W	W	W	A	A	A	A	A	A	NA	W	W	A	W	NA	W	A	W	W	A	A	A	A	A	W	A	W	A	A	A	A	NA	W	W	A	NA	NA	A	A	A	A	W	A	W	A	W	A	W
ChrII	17.8	W	W	W	A	A	A	A	A	A	W	W	W	A	W	W	W	A	W	W	A	A	A	A	A	W	A	W	A	A	A	A	W	W	W	A	W	A	A	A	A	A	W	A	W	A	W	A	W
ChrII	17.9	W	W	W	A	A	A	A	A	A	NA	W	W	A	W	W	W	A	W	W	A	A	A	A	A	W	A	W	A	A	A	A	W	W	W	A	NA	A	A	A	A	A	W	A	W	A	W	A	W
ChrII	18	W	W	W	A	A	A	A	A	A	W	W	W	A	W	W	W	A	W	W	A	A	A	A	A	W	A	W	A	A	A	A	W	W	W	A	W	A	A	A	A	A	W	A	W	A	W	A	W
ChrII	18.1	W	W	W	A	A	A	A	A	A	NA	W	W	A	W	W	W	A	W	W	A	A	A	A	A	W	NA	W	A	A	A	A	W	W	W	A	NA	A	A	A	A	A	W	A	W	A	W	A	W
ChrII	18.2	W	W	W	A	A	A	A	A	A	W	W	W	A	W	W	W	A	W	W	A	A	A	A	A	W	A	W	A	A	A	A	W	W	W	A	W	W	A	A	A	A	W	A	W	A	W	A	W
ChrII	18.3	W	W	W	A	A	A	A	A	A	W	W	W	A	NA	NA	W	A	W	W	A	A	A	A	A	W	A	W	A	A	A	A	W	W	W	A	NA	W	A	A	A	A	W	A	W	A	W	A	W
ChrII	18.4	W	W	W	A	A	A	A	A	A	W	W	W	A	W	NA	W	A	W	W	A	A	A	A	A	W	A	W	A	A	A	A	W	W	W	A	A	W	A	A	A	A	W	A	W	A	W	A	W
ChrII	18.5	W	W	W	A	A	A	A	A	A	W	W	W	A	W	W	W	A	W	W	NA	A	A	A	A	W	A	W	A	A	A	A	W	W	W	A	A	W	A	A	A	A	W	A	W	A	W	A	W
ChrII	18.6	W	W	W	A	A	A	A	A	A	W	W	W	A	W	W	W	NA	W	W	NA	A	W	NA	A	W	A	W	A	A	A	A	W	W	W	A	A	W	A	A	A	A	W	A	W	A	W	A	W
ChrII	18.7	W	W	W	A	A	A	A	A	A	W	W	W	A	W	W	W	A	W	W	A	A	W	A	A	W	A	W	A	A	A	A	W	W	W	A	A	W	A	A	A	A	W	A	W	A	W	A	W
ChrII	18.8	W	W	W	A	A	A	A	A	A	W	NA	W	A	W	W	W	A	W	W	A	A	W	A	A	W	A	W	A	A	A	A	W	W	W	A	A	W	A	A	A	A	W	A	W	A	W	A	W
ChrII	18.9	W	W	W	A	A	A	A	A	A	W	A	W	A	W	NA	W	A	W	W	A	A	W	A	A	W	A	W	A	A	A	A	NA	W	W	A	A	W	A	A	A	A	W	A	W	A	W	A	W
ChrII	19	W	W	W	A	A	A	A	A	NA	W	NA	W	A	W	NA	W	A	W	W	A	A	W	NA	A	W	A	W	A	A	A	NA	NA	W	W	A	A	NA	NA	NA	A	A	W	NA	W	A	W	NA	W
ChrII	19.1	W	W	W	A	A	A	A	A	A	W	A	W	A	W	W	W	A	W	W	A	A	W	A	A	W	A	W	A	A	A	A	W	W	W	A	A	W	A	A	A	A	W	A	W	A	W	A	W
ChrII	19.2	W	W	W	A	A	A	A	A	A	W	A	W	A	W	NA	W	A	W	W	A	A	W	A	A	W	A	W	A	A	A	A	W	W	W	A	A	W	A	A	A	NA	W	A	W	A	NA	A	W
ChrII	19.3	W	W	W	A	A	A	A	A	A	W	A	W	A	W	W	W	A	W	W	A	A	W	A	A	NA	A	W	A	A	A	A	W	W	W	A	A	W	A	A	A	W	W	A	W	A	A	A	W
ChrII	19.4	W	W	W	A	A	A	A	A	A	W	A	W	A	W	W	W	A	W	W	A	A	W	A	A	W	A	W	A	A	A	A	W	W	W	A	A	W	A	A	A	W	W	A	W	A	A	A	W
ChrII	19.5	W	NA	W	NA	A	A	NA	NA	A	W	NA	W	A	W	NA	W	A	W	W	NA	A	W	NA	A	NA	A	W	A	A	A	A	W	W	W	A	A	W	A	A	A	W	W	A	W	A	A	A	W
ChrII	19.6	W	W	W	A	A	A	A	A	A	W	A	W	A	W	NA	W	A	W	W	A	A	W	A	A	W	A	W	A	A	A	A	W	W	W	A	A	W	A	A	A	W	W	A	W	A	A	A	W
ChrII	19.7	W	W	W	A	A	NA	A	A	A	W	A	W	A	W	W	W	A	W	W	A	A	W	A	NA	W	A	W	NA	A	A	A	W	W	W	A	A	W	NA	A	A	W	W	A	W	NA	A	NA	W
ChrII	20.2	NA	W	W	A	NA	A	A	NA	NA	A	A	W	A	W	NA	NA	A	W	W	A	A	W	A	W	NA	A	W	W	A	A	A	W	W	W	A	A	W	A	A	A	W	A	A	W	A	A	A	W
ChrII	20.3	NA	W	W	A	NA	A	A	A	A	A	A	W	A	W	W	W	A	W	W	A	A	W	A	W	W	A	W	W	A	A	A	W	W	W	A	A	W	A	A	A	W	A	A	W	A	A	A	W
ChrII	20.4	W	W	W	A	A	A	A	A	A	A	A	W	A	W	NA	NA	A	W	W	A	A	W	A	W	NA	A	W	W	A	A	A	W	W	W	A	A	W	A	A	A	W	A	A	W	A	A	A	W
ChrII	20.5	W	W	W	A	A	A	A	A	A	A	A	W	A	W	W	W	A	W	W	A	A	W	A	W	W	A	W	W	A	A	A	W	W	W	A	A	W	A	A	A	W	A	A	W	A	A	A	W
ChrII	20.6	W	NA	W	A	A	A	A	A	A	A	A	W	A	W	NA	W	A	W	NA	A	NA	W	A	W	W	A	W	W	A	A	A	NA	W	W	A	A	W	A	A	A	W	A	A	W	A	A	A	W
ChrII	20.7	NA	A	W	A	A	A	A	A	A	A	A	W	A	NA	W	NA	A	W	A	A	A	W	A	W	W	A	W	W	A	A	A	NA	W	W	A	A	W	A	A	A	W	A	A	W	A	A	A	W
ChrII	20.8	W	A	NA	A	A	A	A	A	A	A	A	W	A	NA	W	NA	NA	W	A	A	A	W	A	W	NA	A	W	W	A	A	A	NA	W	W	A	A	NA	A	A	A	W	A	A	W	A	A	A	W
ChrII	21	NA	A	W	A	A	A	A	A	NA	A	A	W	A	NA	W	W	A	W	NA	A	A	W	A	W	W	A	W	W	A	A	A	W	W	W	A	A	W	A	A	A	W	NA	A	W	A	A	A	W
ChrII	21.2	W	A	W	A	A	A	A	A	A	A	A	W	A	NA	W	W	A	W	A	A	A	W	A	W	NA	A	W	W	A	A	A	NA	W	W	A	A	NA	A	A	A	W	A	A	W	A	A	A	W
ChrII	21.3	W	A	W	A	A	A	A	A	A	A	A	W	A	W	W	W	A	W	A	A	A	W	A	W	NA	A	W	W	A	A	A	NA	W	W	A	A	W	A	A	A	W	A	A	W	A	A	A	W
ChrII	21.4	W	A	W	A	A	A	A	A	A	A	A	W	A	W	W	W	A	W	A	A	A	W	A	W	W	A	W	W	A	A	A	W	NA	W	A	A	W	A	A	A	W	A	A	W	A	A	A	W
ChrII	21.5	W	A	W	A	A	A	A	A	A	A	A	W	A	W	W	W	A	W	A	A	A	W	A	W	W	A	NA	NA	A	A	A	W	W	W	A	A	W	A	A	A	W	A	A	W	A	A	A	NA
ChrII	21.6	W	A	W	A	A	A	A	A	A	A	A	W	A	W	W	W	A	W	A	A	A	W	A	W	W	A	W	W	A	A	A	W	W	W	A	A	W	A	A	A	W	A	A	W	A	A	A	W
ChrII	21.7	NA	A	NA	A	A	A	A	A	A	A	A	W	A	W	NA	NA	A	W	A	A	A	W	A	W	W	A	W	W	A	A	A	W	W	W	A	A	NA	A	A	A	W	A	A	W	A	A	A	W
ChrII	21.9	W	A	W	A	A	A	A	NA	A	A	A	W	A	W	W	W	NA	W	A	A	A	W	A	W	W	A	W	W	A	A	A	NA	W	W	A	A	W	A	A	A	W	A	A	W	A	A	A	W
ChrII	22	W	A	NA	A	A	A	A	A	A	A	A	W	A	NA	NA	W	A	W	A	A	A	W	A	W	W	A	W	W	A	A	A	NA	W	W	A	A	W	A	A	A	W	A	A	W	A	A	A	W
ChrII	22.1	W	A	W	A	A	A	A	A	A	A	A	W	A	W	W	W	A	W	A	A	A	W	A	W	W	A	W	W	A	A	A	W	W	W	A	A	W	A	A	A	W	A	A	W	A	A	A	W
ChrII	22.2	W	A	W	A	A	A	A	A	A	A	A	W	A	W	W	W	A	W	A	NA	A	W	A	W	W	A	W	W	A	A	A	W	W	W	A	A	W	A	A	A	W	A	A	W	A	A	A	W
ChrII	22.3	W	A	W	A	A	A	A	A	A	A	A	W	A	W	W	W	A	W	A	A	A	W	A	W	W	A	W	W	A	A	A	W	W	W	A	A	W	A	A	A	W	A	A	W	A	A	A	W
ChrII	22.4	W	A	W	A	A	A	A	A	A	A	A	W	A	W	W	W	A	W	A	A	A	W	A	W	W	A	W	W	A	A	A	W	W	W	A	A	W	A	A	A	W	A	A	W	A	A	A	W
ChrII	22.5	W	A	W	A	A	A	A	A	A	A	A	W	A	W	W	W	A	W	A	A	A	W	A	W	W	A	W	W	A	A	A	W	W	W	A	A	W	A	A	A	W	A	A	W	A	A	A	W
ChrII	22.6	W	A	W	A	A	A	A	A	A	A	A	W	A	NA	W	W	A	W	A	A	A	W	A	W	W	A	W	W	A	A	A	W	W	W	A	A	W	A	A	A	W	A	A	W	A	A	A	W
ChrII	22.7	W	A	W	A	A	A	A	A	A	A	A	W	A	W	W	W	A	W	A	A	A	W	A	W	W	A	W	W	A	A	A	W	W	NA	A	A	NA	A	A	A	W	A	A	W	A	A	A	W
ChrII	22.8	W	A	W	A	A	A	A	A	A	A	A	W	A	W	W	W	A	W	A	A	A	W	A	W	W	A	W	W	A	A	A	W	W	W	A	A	W	A	A	A	W	A	A	W	A	A	A	W
ChrII	22.9	W	A	W	A	A	A	A	A	A	A	A	W	A	NA	W	W	A	W	A	A	A	W	A	W	W	A	W	W	A	A	A	W	W	W	A	A	W	A	A	A	W	A	A	W	A	A	A	W
ChrII	23	W	A	W	A	A	A	A	A	A	A	A	W	A	W	W	W	A	W	A	A	A	W	A	W	W	A	W	W	A	A	A	W	W	W	A	A	W	A	A	A	W	A	A	W	A	A	A	W
ChrII	23.1	W	A	W	A	A	A	A	A	A	A	A	W	A	W	W	NA	A	W	A	NA	A	W	A	W	W	A	W	W	A	A	A	W	W	W	A	A	W	A	A	A	W	A	A	W	A	A	A	W
ChrII	23.2	NA	A	NA	A	A	A	A	A	A	A	A	W	A	NA	NA	NA	A	W	A	NA	A	W	A	W	NA	A	W	W	A	A	A	NA	W	W	A	NA	NA	A	A	A	W	A	A	W	A	A	A	W
ChrIII	0	A	W	W	A	W	W	W	A	A	A	W	A	W	A	W	A	W	A	W	W	A	W	A	W	W	W	W	A	W	W	W	W	W	W	W	W	A	W	A	A	W	A	A	W	A	W	W	A
ChrIII	0.1	A	W	W	A	W	W	W	A	A	A	W	A	W	A	W	A	W	A	W	W	A	W	A	W	W	W	W	A	W	W	W	W	W	NA	W	W	A	W	A	A	W	A	A	W	A	W	W	A
ChrIII	0.2	A	W	W	A	W	W	NA	A	A	A	W	A	W	A	NA	A	W	A	W	W	A	W	A	W	W	W	W	NA	W	W	W	NA	W	W	W	W	A	W	A	A	W	A	A	W	A	W	W	A
ChrIII	0.3	A	W	W	A	W	W	W	A	A	A	W	A	W	A	NA	A	W	A	W	W	A	W	A	W	W	W	W	A	W	W	W	W	W	W	W	W	A	W	A	A	W	A	A	W	A	W	W	A
ChrIII	0.4	A	W	W	A	W	W	W	A	A	A	W	A	W	A	W	A	W	A	W	W	A	W	A	W	W	W	W	A	W	W	W	W	W	W	W	W	A	W	A	A	W	A	A	W	A	W	W	A
ChrIII	0.5	A	W	W	A	W	W	NA	A	A	A	W	A	W	A	W	A	W	A	W	W	A	NA	A	W	W	W	W	A	W	W	W	W	NA	W	W	W	A	W	A	A	W	A	A	W	A	W	W	A
ChrIII	0.7	A	W	NA	A	W	W	NA	NA	A	A	W	A	NA	A	NA	A	W	A	NA	W	A	W	A	W	W	NA	W	NA	W	NA	W	NA	NA	W	W	W	A	NA	A	A	W	A	A	W	A	NA	NA	A
ChrIII	0.8	A	W	W	A	W	W	W	A	A	A	W	A	W	A	W	A	W	A	W	W	A	W	A	W	W	W	W	A	W	W	W	W	W	W	W	W	A	W	A	A	W	A	A	W	A	W	W	A
ChrIII	0.9	A	W	W	A	W	W	W	A	A	A	W	A	W	NA	NA	A	W	A	W	W	A	W	A	W	W	W	W	A	NA	W	W	W	W	W	W	W	A	W	A	A	W	A	A	W	A	W	W	A
ChrIII	1.3	NA	W	W	A	W	W	W	A	A	A	W	NA	W	A	NA	A	W	A	W	W	A	W	A	W	W	W	W	A	W	W	W	W	W	W	W	W	A	W	A	NA	W	A	A	W	A	W	W	A
ChrIII	1.4	A	W	W	A	W	W	W	A	A	A	W	A	W	A	NA	A	W	A	NA	W	A	W	A	W	W	W	W	A	W	W	W	W	W	W	W	W	A	W	A	A	W	A	A	W	A	W	W	A
ChrIII	1.5	A	W	W	A	W	W	W	A	A	A	W	NA	W	A	NA	A	W	A	W	W	NA	NA	A	W	W	W	W	A	W	W	W	W	W	W	W	W	A	W	A	A	W	A	A	W	A	W	W	A
ChrIII	1.6	A	W	W	A	W	W	NA	NA	A	A	NA	A	W	A	NA	A	W	A	NA	W	NA	W	A	NA	W	W	W	A	W	NA	W	NA	NA	W	W	W	A	W	A	A	W	A	A	W	A	W	NA	A
ChrIII	1.7	A	W	NA	A	W	W	NA	A	A	A	W	A	W	A	NA	A	W	A	NA	W	A	NA	A	W	W	NA	NA	A	W	NA	W	NA	NA	NA	W	W	A	NA	A	A	W	A	A	W	A	NA	W	A
ChrIII	1.8	A	W	W	A	W	W	NA	A	A	A	W	A	W	A	NA	A	W	A	W	W	NA	W	A	W	W	W	W	A	W	NA	W	W	W	W	W	W	A	W	A	A	W	A	A	W	A	W	W	A
ChrIII	1.9	NA	W	W	A	W	W	W	A	A	A	W	A	W	A	W	A	W	A	W	NA	A	W	A	W	W	W	W	A	W	W	W	NA	W	W	W	W	A	W	A	A	W	A	A	W	A	W	W	A
ChrIII	2	A	W	W	A	W	W	W	A	A	A	W	A	W	A	W	A	W	A	W	W	A	W	A	W	W	W	W	A	W	W	W	W	W	W	W	W	A	W	A	A	W	A	A	W	A	W	W	A
ChrIII	2.1	A	W	W	A	W	W	W	A	A	A	W	A	W	A	W	A	W	A	W	W	A	W	A	W	W	W	W	A	W	W	W	W	W	W	W	W	A	W	A	A	W	A	A	W	A	W	W	A
ChrIII	2.2	A	W	W	A	W	W	W	NA	A	A	W	A	W	A	W	A	W	A	W	W	A	W	NA	W	W	W	W	A	W	W	W	W	W	W	W	W	A	W	A	A	W	A	A	W	A	W	W	A
ChrIII	2.3	A	W	W	A	W	W	W	A	A	A	W	A	W	A	W	A	W	A	W	W	A	W	A	W	W	W	W	A	W	W	W	W	W	W	W	W	A	W	A	A	W	A	A	W	NA	W	W	A
ChrIII	2.5	A	W	W	A	W	W	W	NA	A	A	W	A	W	A	NA	A	W	A	W	W	A	W	A	W	W	W	W	A	W	W	W	W	W	W	W	W	A	W	A	A	W	A	A	W	A	W	W	A
ChrIII	2.6	A	W	W	A	W	W	W	A	A	A	W	A	W	A	W	A	W	A	W	W	A	W	A	W	W	W	W	A	W	W	W	W	W	W	W	W	A	W	A	A	W	A	A	W	A	W	W	A
ChrIII	2.7	A	W	NA	A	W	W	W	A	A	A	W	A	NA	A	NA	A	W	A	W	W	A	W	NA	NA	W	NA	NA	NA	W	W	W	W	NA	W	W	W	A	W	A	A	W	A	A	W	A	W	W	A
ChrIII	2.8	A	W	W	A	W	W	W	A	A	A	W	A	W	A	W	A	W	A	W	W	A	W	A	W	W	NA	W	A	W	W	W	W	W	NA	W	W	A	W	A	A	W	A	A	W	A	W	W	A
ChrIII	2.9	A	W	W	A	W	W	W	A	A	A	W	A	W	A	NA	A	W	A	W	W	A	W	A	W	W	W	W	A	W	W	W	W	W	W	W	W	A	W	A	A	W	A	A	W	A	W	W	A
ChrIII	3.1	A	W	W	A	W	W	W	A	A	A	W	A	W	A	W	A	W	A	W	W	A	W	A	W	W	W	W	A	W	W	W	W	W	W	W	W	A	W	A	A	W	A	A	W	A	W	W	A
ChrIII	3.2	A	W	W	A	W	W	W	A	A	A	W	A	W	A	NA	A	W	A	W	W	A	W	A	W	W	W	W	A	W	W	W	W	W	W	W	W	A	W	A	A	W	A	A	W	A	W	W	A
ChrIII	3.3	A	W	W	A	W	W	W	A	A	A	W	A	W	A	W	A	W	A	W	W	A	W	A	W	W	W	W	A	W	W	W	W	W	W	W	W	A	W	A	A	W	A	A	W	A	W	W	A
ChrIII	3.4	A	W	W	A	W	W	W	A	A	A	W	A	W	A	W	A	W	A	W	W	A	W	A	W	W	W	W	A	W	W	W	W	W	W	W	W	A	W	A	A	W	A	A	W	A	W	W	A
ChrIII	3.5	A	W	W	A	W	NA	W	A	A	A	W	A	W	A	NA	A	W	A	W	W	NA	W	A	W	W	W	W	A	W	W	W	W	W	W	W	W	A	W	A	A	W	A	A	W	A	W	W	A
ChrIII	3.6	A	W	W	A	W	W	W	A	A	A	W	A	W	A	W	A	W	A	W	W	A	W	A	W	W	W	W	A	W	W	W	W	W	W	W	W	A	W	A	A	W	A	A	W	A	W	W	A
ChrIII	3.7	A	W	W	A	W	W	NA	NA	A	A	W	A	W	NA	W	A	W	A	W	W	A	W	A	W	W	W	W	NA	W	W	W	W	W	W	W	W	A	W	A	A	W	A	A	W	A	W	W	A
ChrIII	3.8	A	W	W	A	W	W	W	A	A	A	W	A	W	A	W	A	W	A	W	W	A	W	A	W	W	W	W	A	W	W	W	W	W	W	W	W	A	W	A	A	W	A	A	W	A	W	W	A
ChrIII	3.9	A	W	W	A	W	W	W	A	A	A	W	A	W	A	W	A	W	A	W	NA	A	W	A	W	W	W	W	A	W	W	W	W	W	W	W	W	A	W	A	A	W	A	A	W	NA	W	W	A
ChrIII	4	A	W	W	A	W	W	W	NA	A	A	W	A	W	A	W	A	W	A	W	W	A	W	A	W	W	NA	W	A	W	W	W	W	W	W	W	W	A	W	A	A	W	A	A	W	A	W	W	A
ChrIII	4.1	A	W	NA	A	W	W	W	NA	A	A	W	A	W	A	W	A	W	A	NA	W	NA	W	NA	W	W	W	W	A	W	W	W	W	W	W	W	W	A	W	A	A	W	A	A	W	A	W	W	A
ChrIII	4.2	A	W	NA	A	W	W	W	A	A	A	NA	A	W	A	W	A	W	A	W	W	A	NA	A	NA	W	W	W	A	W	W	W	W	NA	W	W	W	A	W	A	A	W	A	A	W	A	W	NA	A
ChrIII	4.3	A	W	W	A	W	W	NA	A	A	A	W	A	W	A	W	A	W	A	W	W	A	W	A	W	W	W	W	A	W	W	W	W	NA	W	W	W	A	W	A	A	W	A	A	W	A	W	NA	A
ChrIII	4.4	A	W	W	A	W	W	W	A	A	A	W	A	W	A	NA	A	W	A	W	W	A	W	A	W	W	W	W	A	W	W	W	W	W	W	W	W	A	W	A	A	W	A	A	W	A	W	W	A
ChrIII	4.5	A	W	W	A	W	W	W	A	A	A	W	A	W	A	W	A	W	A	W	W	A	W	A	W	W	W	W	A	W	W	W	W	W	W	W	W	A	W	A	A	W	A	A	W	A	W	W	A
ChrIII	4.6	A	W	W	A	W	W	W	A	A	A	W	A	W	A	W	A	W	A	W	W	A	W	A	W	W	W	NA	A	W	W	W	W	W	W	W	W	A	W	A	A	W	A	A	W	A	W	W	A
ChrIII	4.7	NA	W	W	A	W	W	W	NA	A	A	W	A	W	NA	W	NA	W	A	W	W	NA	W	NA	W	W	W	W	A	W	W	W	W	W	W	W	W	A	W	A	NA	W	A	A	W	NA	W	W	A
ChrIII	4.8	A	W	W	A	W	W	W	A	A	A	W	A	W	A	W	A	W	A	W	W	A	W	A	W	W	W	W	A	W	W	W	W	W	W	W	W	A	W	A	A	W	A	A	W	A	W	W	A
ChrIII	4.9	A	W	W	A	W	W	W	A	A	A	W	A	W	A	W	A	W	NA	W	W	NA	W	A	W	W	NA	W	A	W	W	W	W	W	NA	W	W	A	W	A	A	W	A	A	W	A	W	W	A
ChrIII	5	A	W	W	A	W	W	W	A	A	A	W	A	W	A	W	A	W	A	W	W	A	W	A	W	W	W	W	A	W	W	W	W	W	W	W	W	A	W	A	A	W	A	A	W	A	W	W	A
ChrIII	5.1	A	W	W	A	W	NA	W	A	A	A	W	A	W	A	W	A	W	A	W	W	A	W	A	W	W	W	W	A	W	W	W	W	W	W	W	W	A	W	A	A	W	A	A	W	A	W	W	A
ChrIII	5.2	A	W	W	A	W	NA	W	A	A	A	W	A	W	A	W	A	W	A	W	W	A	W	A	W	W	W	W	A	W	W	W	W	W	NA	W	W	A	W	A	A	W	A	A	W	A	W	W	A
ChrIII	5.3	A	W	W	A	W	W	W	A	A	A	W	A	W	A	W	A	W	A	W	W	A	W	A	W	W	W	W	A	W	W	W	W	W	W	W	W	A	W	A	A	W	A	A	W	A	W	W	A
ChrIII	5.4	A	W	W	A	W	W	W	A	A	A	W	A	W	A	W	A	W	A	W	W	A	W	A	W	W	W	W	A	W	W	W	W	W	W	W	W	A	W	A	A	W	A	A	W	A	W	W	A
ChrIII	5.5	NA	W	W	A	W	W	W	NA	NA	A	W	NA	W	A	W	A	W	A	W	W	A	W	A	W	W	W	W	NA	W	W	W	W	W	W	W	W	A	W	A	NA	W	A	A	W	NA	W	W	A
ChrIII	5.6	A	W	W	A	W	W	W	A	A	A	W	A	W	A	W	A	W	A	W	W	A	W	A	W	W	W	W	A	W	W	W	W	W	W	W	W	A	W	A	A	W	A	A	W	A	W	W	A
ChrIII	5.7	A	W	W	NA	W	W	NA	A	A	A	W	A	W	A	W	A	W	A	W	NA	A	W	A	W	W	W	W	A	W	W	W	W	W	W	W	W	A	W	A	A	W	A	A	W	A	W	W	A
ChrIII	5.8	A	W	W	A	W	W	NA	A	A	A	W	A	W	A	W	A	W	A	W	W	A	W	A	W	W	W	W	A	W	W	W	NA	W	W	W	W	A	W	A	A	W	A	A	W	A	W	W	A
ChrIII	5.9	A	W	W	A	W	W	W	A	A	A	W	A	W	A	W	A	W	A	W	W	A	W	A	W	W	W	W	A	W	W	W	W	W	W	W	W	A	W	A	A	W	A	A	W	A	W	W	A
ChrIII	6	A	W	W	A	W	W	W	A	A	A	W	A	W	A	W	A	W	A	W	W	A	W	A	W	W	W	W	A	W	W	W	W	W	W	W	W	A	W	A	A	W	A	A	W	A	W	W	A
ChrIII	6.1	A	W	W	A	W	W	W	A	A	A	W	A	W	A	W	A	W	A	W	W	A	W	A	W	W	W	W	A	W	W	W	W	W	W	W	W	A	W	A	A	W	A	A	W	A	W	W	A
ChrIII	6.2	A	W	W	A	W	W	W	NA	A	A	W	A	W	A	W	A	W	A	W	W	NA	W	NA	W	W	W	W	A	W	W	W	W	W	W	W	W	A	NA	A	A	W	A	A	W	NA	W	W	A
ChrIII	6.3	A	W	W	A	W	NA	W	A	A	A	W	A	W	A	W	A	W	A	W	W	A	W	A	W	W	W	W	A	W	W	W	W	NA	W	W	W	A	W	A	A	W	A	A	W	A	W	W	A
ChrIII	6.4	A	W	W	A	W	NA	NA	A	A	A	NA	A	W	NA	NA	A	W	A	NA	W	A	NA	A	W	W	W	W	A	W	W	W	NA	NA	W	W	W	NA	W	A	A	W	A	A	W	A	W	NA	A
ChrIII	6.5	NA	W	W	A	W	W	W	NA	NA	A	W	NA	W	A	NA	A	W	A	W	W	NA	W	A	W	W	W	W	A	W	W	W	W	W	W	W	W	A	W	A	NA	W	A	A	W	NA	W	W	A
ChrIII	6.6	A	W	W	A	W	W	W	A	A	A	W	A	W	A	W	A	W	A	W	W	A	W	A	W	W	W	W	A	W	W	W	W	W	W	W	W	A	W	A	A	W	A	A	W	A	W	W	A
ChrIII	6.7	A	W	W	A	W	W	W	A	A	A	W	A	W	A	W	A	W	A	W	W	A	W	A	W	W	W	W	A	W	W	W	W	W	W	W	W	A	W	A	A	W	A	A	W	A	W	W	A
ChrIII	6.8	A	W	W	A	W	W	NA	A	A	A	W	A	W	A	W	A	W	A	W	W	A	W	A	W	W	W	W	A	W	W	W	W	W	W	W	W	A	W	A	A	W	A	A	W	A	W	W	A
ChrIII	6.9	A	W	W	A	W	W	NA	NA	A	A	W	A	W	A	W	A	W	A	W	W	A	W	A	W	W	W	W	A	W	W	W	W	W	W	W	W	A	W	A	A	W	A	A	W	A	W	W	A
ChrIII	7	A	W	W	A	W	W	W	A	A	A	W	A	W	A	W	A	W	A	W	W	A	W	A	W	W	W	W	A	W	W	W	W	W	W	W	W	A	W	A	A	W	A	A	W	A	W	W	A
ChrIII	7.1	A	W	NA	A	W	W	NA	A	A	A	W	A	W	A	W	A	W	A	W	W	A	NA	A	W	W	W	W	A	W	NA	W	NA	W	W	W	W	A	W	A	A	W	A	A	W	A	W	W	A
ChrIII	7.2	A	W	NA	A	W	W	W	A	A	A	W	A	W	A	W	A	W	A	W	W	A	W	A	NA	W	W	W	A	NA	W	W	NA	W	W	W	W	A	W	A	A	W	A	A	W	A	W	NA	A
ChrIII	7.3	A	W	W	A	W	W	W	A	A	A	W	A	W	A	W	A	W	A	W	W	A	W	A	W	W	W	W	A	W	W	W	W	W	W	W	W	A	W	A	A	W	A	A	W	A	W	W	A
ChrIII	7.4	A	W	W	A	W	W	NA	NA	A	A	W	A	W	A	W	A	W	A	W	W	NA	W	A	W	W	W	W	A	NA	W	W	W	W	NA	W	W	A	W	A	A	W	A	A	W	NA	W	W	A
ChrIII	7.5	A	W	W	A	W	W	W	A	A	A	W	A	W	A	W	A	W	A	W	W	A	W	A	W	W	W	W	A	W	W	W	W	W	W	W	W	A	W	A	A	W	A	A	W	A	W	W	A
ChrIII	7.6	A	W	W	A	W	W	W	A	A	A	W	A	W	A	W	A	W	A	W	W	A	W	A	W	W	W	W	A	W	W	W	W	W	W	W	W	A	W	A	A	W	A	A	W	A	W	W	A
ChrIII	7.7	A	W	W	A	W	W	W	A	A	A	W	A	W	A	W	A	W	A	NA	W	A	W	A	W	W	W	W	A	W	W	W	W	W	W	W	W	A	W	A	A	W	A	A	W	A	W	W	A
ChrIII	7.8	A	W	W	A	W	W	W	A	A	A	W	A	W	A	W	A	W	A	NA	W	A	W	A	W	W	W	W	A	W	NA	W	W	W	NA	W	W	A	W	A	A	W	A	A	W	A	W	W	A
ChrIII	7.9	A	W	W	A	W	NA	W	A	A	A	W	A	W	A	W	A	W	A	W	W	A	W	A	W	W	W	W	A	W	W	W	W	W	W	W	W	A	W	A	A	W	A	A	W	A	W	W	A
ChrIII	8	A	W	W	A	W	W	W	A	A	A	W	A	W	A	W	A	W	A	W	W	A	W	A	W	W	W	W	A	W	W	W	NA	W	W	W	W	A	W	A	A	W	A	A	W	A	W	W	A
ChrIII	8.1	A	W	W	A	W	W	NA	A	A	A	W	A	W	A	W	A	W	A	W	W	A	W	A	W	W	W	W	A	W	W	W	W	W	W	W	W	A	W	A	A	W	A	A	W	A	W	W	A
ChrIII	8.2	A	W	W	A	W	W	NA	A	A	A	W	A	W	A	W	A	W	A	W	W	A	W	A	W	W	W	W	A	W	W	W	W	NA	W	W	W	A	W	A	A	W	A	A	W	A	W	W	A
ChrIII	8.3	A	W	W	A	W	W	W	A	A	A	W	A	W	A	W	A	W	A	W	W	A	W	A	W	W	W	W	A	W	W	W	W	W	W	W	W	A	W	A	A	W	A	A	W	A	W	NA	A
ChrIII	8.4	A	W	W	A	W	W	W	A	A	A	W	A	W	A	W	A	W	A	W	W	A	W	A	W	W	W	W	A	W	W	W	W	W	W	W	W	A	W	A	A	W	A	A	W	A	W	W	A
ChrIII	8.5	A	W	W	A	W	W	W	A	A	A	W	A	W	A	W	A	W	A	W	W	NA	W	A	W	W	W	W	A	W	W	W	W	W	W	W	W	A	W	A	A	W	A	A	W	A	W	W	A
ChrIII	8.6	A	W	W	A	W	W	W	A	A	A	W	A	W	A	W	A	W	A	W	W	A	W	A	W	W	W	W	A	W	W	W	W	W	W	W	W	A	W	A	A	W	A	A	W	A	W	W	A
ChrIII	8.7	A	W	W	A	W	W	W	A	A	A	W	A	W	A	W	A	W	A	W	W	A	W	A	W	W	W	W	A	W	W	W	W	W	W	W	W	A	W	A	A	W	A	A	W	A	W	W	A
ChrIII	8.8	A	W	W	A	W	W	W	A	A	A	W	A	W	NA	NA	A	W	A	NA	W	A	W	A	W	W	W	W	A	W	NA	W	NA	NA	W	W	W	A	W	A	A	W	A	A	W	A	NA	W	A
ChrIII	8.9	A	W	W	A	W	W	W	A	A	A	W	A	W	A	W	A	W	A	W	W	A	W	A	W	W	W	W	NA	W	W	W	W	W	W	W	W	A	W	A	A	W	A	A	W	A	W	W	A
ChrIII	9	A	W	W	A	W	W	W	A	A	A	W	A	W	A	W	A	W	A	W	W	NA	W	A	A	W	W	W	A	W	W	W	W	W	W	W	W	A	W	A	A	W	A	A	W	A	W	W	A
ChrIII	9.1	A	W	W	A	W	W	W	A	A	A	W	A	W	A	W	A	W	A	W	W	NA	W	A	A	W	W	W	A	W	W	W	W	W	NA	W	W	A	W	A	A	W	A	A	W	A	W	W	A
ChrIII	9.2	A	W	W	A	W	W	W	A	A	A	W	A	W	A	W	A	W	A	W	W	NA	W	A	A	W	W	W	A	W	W	W	W	W	W	W	W	A	W	A	A	W	A	A	W	A	W	W	A
ChrIII	9.3	A	W	W	A	W	W	W	A	A	A	W	A	W	A	W	A	W	A	W	W	A	W	A	A	W	W	W	A	W	W	W	W	W	NA	W	W	A	W	A	A	W	A	A	W	A	W	W	A
ChrIII	9.4	A	W	W	A	W	W	W	A	A	A	W	A	W	A	W	A	W	A	W	W	A	W	A	A	W	W	W	A	W	W	W	W	W	W	W	W	A	W	A	A	W	A	A	W	A	W	W	A
ChrIII	9.5	A	W	W	A	W	W	NA	A	A	A	W	A	W	A	W	A	W	A	W	W	A	W	A	A	W	W	W	A	W	W	W	W	W	W	W	W	A	W	A	A	W	A	A	W	A	W	W	A
ChrIII	9.6	A	W	W	A	W	W	W	A	A	A	W	A	W	A	W	A	W	A	W	W	A	W	A	A	W	W	W	A	W	W	W	W	W	W	W	W	A	W	A	A	W	A	A	W	A	W	W	A
ChrIII	9.8	NA	W	NA	A	W	W	W	A	NA	A	W	A	W	A	W	A	NA	A	NA	NA	A	NA	A	A	NA	W	NA	A	NA	NA	W	NA	W	W	W	W	A	W	A	A	W	A	A	W	A	W	W	A
ChrIII	10	A	W	W	A	W	W	W	NA	A	A	W	A	W	A	W	A	W	A	W	W	A	W	A	A	W	NA	NA	A	W	W	W	W	W	W	W	W	A	W	A	A	W	A	A	W	A	W	W	A
ChrIII	10.1	A	W	W	A	W	W	W	A	A	A	W	A	W	A	W	A	W	A	W	W	A	W	A	A	W	W	W	A	W	W	W	W	W	W	W	W	A	W	A	A	W	A	A	W	A	W	W	A
ChrIII	10.2	A	W	W	A	W	W	W	A	A	A	W	A	W	A	W	A	W	A	W	W	A	W	A	A	W	W	W	A	W	W	W	W	W	W	W	W	A	W	A	A	W	A	A	W	A	W	W	A
ChrIII	10.3	A	W	W	A	W	W	W	A	A	A	W	A	W	A	W	A	W	A	W	W	A	W	A	A	NA	W	W	A	W	W	W	W	W	W	W	W	A	W	A	A	W	A	A	W	A	W	W	A
ChrIII	10.4	A	W	W	A	W	W	NA	A	A	A	W	A	W	A	W	A	W	A	W	W	A	W	A	A	W	W	W	A	NA	W	W	W	W	W	W	W	A	W	A	A	W	A	A	W	A	W	W	A
ChrIII	10.5	A	W	W	A	W	W	W	A	A	A	W	A	W	A	W	A	W	A	W	W	A	W	A	A	W	W	W	A	W	W	W	W	NA	NA	W	W	A	W	A	A	W	A	A	W	A	W	W	A
ChrIII	10.6	A	W	W	NA	W	W	W	A	A	A	W	A	W	A	W	A	W	A	NA	W	A	W	NA	A	W	W	W	NA	W	W	W	W	W	NA	W	W	A	W	A	A	W	A	A	W	A	W	W	A
ChrIII	10.7	A	W	W	A	W	W	W	A	A	A	W	A	W	A	W	A	W	A	W	W	A	W	A	A	W	W	W	A	W	W	W	W	W	NA	W	W	A	W	A	A	W	A	A	W	A	W	W	A
ChrIII	10.8	A	W	W	A	W	W	W	A	A	A	W	A	W	A	W	A	W	A	W	W	A	W	A	A	W	W	W	A	W	W	W	W	NA	W	W	W	NA	W	A	A	W	A	A	W	A	NA	W	A
ChrIII	10.9	A	W	W	A	W	W	NA	A	A	A	W	A	W	A	W	A	W	A	W	W	A	W	A	A	W	W	W	A	W	NA	W	W	W	W	W	W	A	W	A	A	W	A	A	W	A	W	W	A
ChrIII	11	A	W	W	A	W	W	W	A	A	A	W	A	W	A	W	A	W	A	W	W	A	W	A	A	W	W	W	A	W	W	W	W	W	W	W	W	A	W	A	A	W	A	A	W	A	W	W	A
ChrIII	11.1	A	W	W	NA	W	W	NA	A	A	A	NA	A	W	A	W	A	W	A	W	W	A	NA	A	A	W	W	W	A	W	W	W	W	NA	W	W	W	A	W	A	A	W	A	A	W	A	NA	NA	A
ChrIII	11.2	NA	W	W	A	W	W	W	NA	NA	NA	W	NA	W	A	W	NA	NA	NA	W	W	A	W	A	NA	W	W	W	A	W	W	W	W	W	W	W	W	A	W	A	A	W	NA	A	W	NA	W	W	A
ChrIII	11.3	A	W	W	A	W	W	W	A	A	A	W	A	NA	A	NA	A	W	A	W	W	A	W	A	A	W	W	W	A	NA	W	W	W	W	W	W	W	A	W	A	A	W	A	A	W	A	W	W	A
ChrIII	11.4	A	W	W	A	W	NA	W	A	A	A	NA	A	W	A	W	A	W	A	NA	W	A	NA	A	A	W	W	W	NA	W	W	W	NA	W	NA	W	W	A	W	A	A	W	A	A	W	A	W	W	A
ChrIII	11.5	A	W	NA	A	W	W	NA	A	A	A	W	A	W	A	W	A	W	A	W	W	A	NA	A	A	W	W	W	A	W	W	W	NA	W	NA	W	W	A	W	A	A	W	A	A	W	A	W	W	A
ChrIII	11.6	A	W	W	A	W	W	W	A	A	A	W	A	W	A	W	A	W	A	NA	W	A	W	A	A	W	W	W	A	W	NA	W	W	NA	W	W	W	A	W	A	A	W	A	A	W	A	W	W	A
ChrIII	11.7	A	W	W	A	W	W	W	A	A	A	W	A	W	A	W	A	W	A	W	W	A	W	A	A	W	W	W	A	W	W	W	W	W	NA	W	W	A	W	A	A	W	A	A	W	A	W	W	A
ChrIII	11.9	A	W	W	A	W	W	W	A	A	A	W	A	W	A	W	A	W	A	W	W	A	W	A	A	W	W	W	A	W	W	W	W	W	W	W	W	A	W	A	A	W	A	A	W	A	NA	W	A
ChrIII	12	A	W	W	A	W	NA	W	A	A	A	W	A	W	A	NA	A	W	A	NA	W	A	NA	A	A	W	W	NA	A	NA	NA	W	NA	W	NA	W	W	A	W	A	A	W	A	A	W	A	NA	NA	A
ChrIII	12.1	A	W	W	A	W	W	W	A	A	A	W	A	W	A	W	A	W	A	W	W	A	W	A	A	W	W	W	A	W	W	W	W	W	W	W	W	A	W	A	A	W	A	A	W	A	W	W	A
ChrIII	12.3	A	W	W	A	W	W	W	A	A	A	W	A	W	A	W	A	W	A	W	W	NA	W	A	A	W	W	W	A	W	W	W	W	W	W	W	W	A	W	A	A	W	A	A	W	A	W	W	A
ChrIII	12.4	A	W	W	A	W	W	W	NA	A	A	W	A	W	A	NA	A	W	A	W	W	A	W	A	A	W	W	W	A	W	W	W	W	W	W	W	W	A	W	A	A	W	A	A	W	A	W	W	A
ChrIII	12.5	A	W	W	A	W	W	W	A	A	A	W	A	NA	A	W	A	W	A	W	W	A	W	A	A	W	W	W	A	W	W	W	W	W	W	W	W	A	W	A	A	W	A	A	W	A	W	W	A
ChrIII	12.6	A	W	W	A	W	W	W	A	A	A	W	A	W	A	W	A	W	A	W	W	NA	W	A	A	W	W	W	A	W	W	W	W	W	W	W	W	A	W	A	A	W	A	A	W	A	W	W	A
ChrIII	12.7	A	W	W	A	W	W	W	A	A	A	W	A	W	A	W	A	W	A	W	W	NA	W	A	A	W	W	W	A	W	W	W	W	W	W	W	W	A	W	A	A	W	A	A	W	A	W	W	A
ChrIII	12.8	A	W	NA	A	W	W	NA	A	A	A	W	A	W	A	W	A	W	A	W	W	A	W	A	A	W	W	W	A	W	NA	W	W	W	NA	W	W	A	W	A	A	W	A	A	W	A	NA	W	A
ChrIII	12.9	A	W	W	A	W	W	W	A	A	A	W	A	W	A	W	A	W	A	W	W	A	W	NA	A	W	W	W	A	W	W	W	W	W	W	W	W	A	W	A	A	W	A	A	W	A	W	W	A
ChrIII	13	A	W	W	A	W	W	W	A	A	A	W	A	W	A	W	A	W	A	W	W	A	W	A	A	W	W	W	A	W	W	W	W	W	W	W	W	A	W	A	A	W	A	A	W	A	W	W	A
ChrIII	13.1	A	W	W	A	W	W	NA	A	A	A	NA	A	W	A	W	A	W	A	NA	W	A	W	A	A	W	W	W	NA	W	W	W	W	W	W	W	W	A	W	A	A	W	A	A	W	A	W	W	A
ChrIII	13.2	A	W	W	A	W	W	W	A	A	A	W	A	W	A	W	A	W	A	W	W	A	W	A	A	W	W	W	A	W	W	W	W	W	W	W	W	A	W	A	A	W	A	A	W	A	W	W	A
ChrIII	13.3	A	W	W	A	W	W	W	A	A	A	W	A	W	A	W	A	W	A	W	W	A	W	A	A	W	W	W	A	W	W	W	W	W	W	W	W	A	W	A	A	W	A	A	W	A	W	W	A
ChrIII	13.4	A	W	W	A	W	W	W	A	A	A	W	A	W	A	W	A	W	A	W	W	A	W	A	A	W	W	W	A	W	W	W	W	W	NA	W	W	A	W	A	A	W	A	A	W	A	W	W	A
ChrIII	13.5	A	W	W	A	W	W	W	NA	NA	A	W	A	W	A	W	A	W	A	W	W	A	W	A	A	W	W	W	A	W	W	W	W	W	W	W	W	A	W	A	A	W	A	A	W	A	W	W	A
ChrIII	13.7	A	W	W	A	W	NA	NA	A	A	A	W	A	W	A	W	A	W	A	NA	W	A	W	A	A	W	W	W	A	W	W	W	W	NA	W	W	W	A	W	A	A	W	A	A	W	A	W	W	A
ChrIII	13.8	A	W	W	A	W	W	W	A	A	A	W	A	W	A	W	A	W	A	W	W	A	W	A	A	W	W	W	A	W	W	W	W	W	W	W	W	A	W	A	A	W	A	A	W	A	W	W	A
ChrIII	13.9	NA	W	W	A	W	W	W	NA	NA	A	NA	A	W	A	W	A	W	A	W	W	A	W	A	NA	W	W	W	A	W	W	W	W	W	W	W	W	A	W	A	A	W	A	A	W	NA	W	W	A
ChrIII	14	NA	W	W	A	W	W	W	NA	NA	A	W	NA	W	A	W	NA	W	A	W	W	NA	W	NA	A	W	W	W	A	W	W	W	W	W	W	W	W	A	W	A	NA	W	A	A	W	NA	W	NA	A
ChrIII	14.1	A	W	W	A	W	W	W	A	A	A	W	A	W	A	W	A	W	A	W	W	A	W	A	A	W	W	W	A	W	W	W	A	A	W	W	W	A	W	A	W	W	A	A	W	A	W	A	A
ChrIII	14.2	A	W	W	A	W	W	W	A	A	A	W	A	W	A	W	A	W	A	W	W	A	W	A	A	W	W	W	A	W	W	W	A	A	W	W	W	A	W	A	W	W	A	A	W	A	W	A	A
ChrIII	14.3	A	W	W	A	W	W	NA	A	A	A	W	A	W	A	W	A	W	A	W	W	A	W	A	A	W	W	W	A	W	W	W	A	A	W	W	W	A	W	A	W	W	A	A	W	A	W	A	A
ChrIII	14.4	A	W	W	A	W	W	W	NA	A	A	W	NA	W	A	W	NA	W	A	W	W	A	W	A	A	W	W	W	A	W	W	W	A	A	W	W	W	A	W	A	W	W	A	A	W	A	W	A	A
ChrIII	14.5	NA	W	W	A	W	W	W	NA	NA	NA	W	NA	W	A	W	A	W	A	W	W	A	W	A	A	W	W	W	A	W	W	W	A	A	W	W	W	A	W	A	W	W	A	A	W	A	W	A	A
ChrIII	14.6	A	W	W	A	W	W	W	A	A	A	W	A	A	A	W	A	W	A	W	W	A	W	A	A	W	W	W	A	W	W	W	A	A	W	W	W	A	W	A	W	W	A	A	W	A	W	A	A
ChrIII	14.7	A	W	W	A	W	W	W	A	A	A	W	A	A	A	W	A	W	A	W	W	A	W	A	A	W	W	W	A	W	W	W	A	A	W	W	W	A	W	A	W	W	A	A	W	A	W	A	A
ChrIII	14.8	A	W	W	A	W	W	W	A	A	A	W	A	A	A	W	A	W	A	W	W	A	W	A	A	W	W	W	A	W	W	W	A	A	W	W	W	A	W	A	W	W	A	A	W	A	W	A	A
ChrIII	14.9	A	W	W	A	W	W	W	A	A	A	W	A	A	A	W	A	W	A	W	W	A	W	A	A	W	W	W	A	W	W	W	A	A	W	W	W	A	W	A	W	W	A	A	W	A	W	A	A
ChrIII	15	A	W	W	A	W	W	W	A	A	A	W	A	A	A	W	A	W	A	W	W	A	W	A	A	W	W	W	A	W	W	W	A	A	W	W	W	A	W	A	W	W	A	A	W	A	W	A	A
ChrIII	15.1	A	W	W	A	W	W	W	A	A	A	W	A	A	A	W	A	W	A	W	W	A	W	A	A	W	W	W	A	W	A	W	A	A	W	W	W	A	W	A	W	W	A	A	W	A	W	A	A
ChrIII	15.2	A	W	W	A	W	W	W	NA	A	A	W	A	A	W	NA	A	W	A	W	W	A	W	A	A	W	W	W	A	W	A	W	A	A	W	W	W	A	W	A	W	W	A	A	W	A	W	A	A
ChrIII	15.3	A	W	W	A	W	W	W	A	A	A	W	A	A	W	W	A	W	A	W	W	A	W	A	A	W	W	W	A	W	A	W	A	A	W	W	W	A	W	A	W	W	A	A	W	A	W	A	A
ChrIII	15.5	A	W	W	A	W	W	W	A	A	A	W	A	A	W	W	A	W	A	W	W	A	W	A	A	W	W	W	A	W	A	W	A	A	W	W	W	A	W	A	W	W	A	A	W	A	W	A	A
ChrIII	15.6	A	W	W	A	W	W	W	A	A	A	W	A	A	W	W	A	W	A	W	W	A	W	A	A	W	W	W	A	W	A	W	A	A	W	W	W	A	W	A	W	W	A	A	W	A	W	A	A
ChrIII	15.7	A	W	W	A	W	W	W	A	A	A	W	A	A	W	W	A	W	A	W	W	A	W	A	A	W	W	W	A	W	A	W	A	A	NA	W	W	A	W	A	W	W	A	A	W	A	W	A	A
ChrIII	15.8	A	W	W	A	W	W	W	A	A	A	W	A	A	W	W	A	W	A	W	W	A	W	A	A	W	W	W	A	W	A	W	A	A	W	W	W	A	W	A	W	W	A	A	W	A	W	A	A
ChrIII	15.9	A	W	W	A	W	W	W	A	A	A	W	A	A	W	W	A	W	A	W	W	A	W	A	A	W	W	W	A	W	A	W	A	A	W	W	W	A	W	A	W	W	A	A	W	A	W	A	A
ChrIII	16	A	W	W	A	W	W	W	A	A	A	W	A	A	NA	W	A	W	A	W	W	A	W	A	A	W	W	W	A	W	A	W	A	A	NA	W	W	A	W	A	W	W	A	A	W	A	W	A	A
ChrIII	16.1	A	W	W	A	W	W	W	A	A	A	W	A	A	W	W	A	W	A	W	W	NA	W	NA	A	W	W	W	A	W	A	W	A	A	W	W	W	A	W	A	W	W	A	A	W	A	W	A	A
ChrIII	16.2	A	W	W	A	W	W	W	A	A	A	W	A	A	W	W	A	W	A	W	W	A	W	A	A	NA	W	W	A	W	A	W	A	A	W	W	W	A	W	A	W	W	A	A	W	A	W	A	A
ChrIII	16.3	A	W	W	A	W	W	W	A	A	A	W	A	A	W	W	A	W	A	W	W	A	W	A	A	W	W	W	A	W	A	W	A	A	W	W	W	A	W	A	W	W	A	A	W	A	W	A	A
ChrIII	16.4	A	W	W	A	W	W	W	A	A	A	W	A	A	W	W	A	W	A	W	W	A	W	A	A	W	W	W	A	W	A	W	A	A	W	W	W	A	W	A	W	W	A	A	W	A	A	A	A
ChrIII	16.5	A	W	W	A	W	W	W	A	A	A	W	A	A	W	W	A	W	A	W	W	A	W	A	A	W	W	W	A	W	A	W	A	A	W	W	W	A	W	A	W	W	A	A	W	A	A	A	A
ChrIII	16.6	A	W	W	A	W	W	W	A	A	A	W	A	A	W	W	A	NA	A	W	W	A	A	A	A	W	W	W	A	W	A	W	A	A	W	W	W	A	W	A	W	W	A	A	W	A	A	A	A
ChrIII	16.7	A	W	W	A	W	W	NA	A	A	A	W	A	A	W	NA	A	A	A	W	W	A	A	A	A	W	W	W	A	W	A	W	A	A	W	W	W	A	W	A	W	W	A	A	W	A	A	A	A
ChrIII	16.8	A	W	W	A	W	W	W	NA	A	A	W	A	A	W	W	A	A	A	W	W	A	A	A	A	W	W	W	A	W	A	NA	A	A	W	W	W	A	W	A	W	W	A	A	W	A	A	A	A
ChrIII	16.9	A	W	W	A	W	W	W	A	A	A	W	A	A	W	W	A	A	A	W	W	A	A	A	A	W	W	W	A	W	A	A	A	A	W	W	W	A	W	A	W	W	A	A	W	A	A	A	A
ChrIII	17	A	W	W	A	W	W	W	A	A	A	W	A	A	W	W	A	A	A	W	W	A	A	A	A	W	W	W	A	W	A	A	A	A	W	W	W	A	W	A	W	W	A	A	W	A	A	A	A
ChrIII	17.1	A	W	W	NA	W	W	W	A	A	A	W	A	A	NA	W	A	A	A	NA	W	A	A	A	A	W	W	W	A	W	A	A	A	A	W	W	W	A	W	A	W	W	A	A	W	A	A	A	A
ChrIII	17.2	A	W	W	A	W	W	W	A	A	A	W	A	A	W	W	A	A	A	W	W	A	A	A	A	W	W	W	A	W	A	A	A	A	W	W	W	A	W	A	W	W	A	A	W	A	A	A	A
ChrIII	17.3	A	NA	NA	A	W	NA	W	W	A	A	W	A	A	W	W	A	A	A	W	W	W	A	W	A	W	W	W	A	W	A	A	A	NA	W	A	W	NA	W	A	W	W	A	A	W	A	A	A	A
ChrIII	17.4	A	W	A	A	W	W	W	W	A	A	W	A	A	W	NA	A	A	A	W	W	W	A	W	A	W	W	W	A	W	A	A	A	A	W	A	W	A	W	A	W	W	A	A	W	A	A	A	A
ChrIII	17.5	A	W	A	A	W	W	W	W	A	A	W	A	A	W	W	A	A	A	W	W	W	A	W	A	W	W	W	NA	W	A	A	A	NA	W	A	W	A	W	A	W	W	A	A	W	A	A	A	A
ChrIII	17.6	A	NA	A	A	W	NA	W	W	A	A	W	A	A	W	W	A	A	A	W	W	W	A	W	A	W	W	W	A	W	A	A	A	A	W	A	W	A	W	W	W	W	A	A	W	A	A	A	A
ChrIII	17.7	A	A	A	A	W	A	W	W	A	A	W	A	A	W	W	A	A	A	W	W	W	A	W	A	W	W	W	A	W	A	A	A	A	W	A	W	A	W	W	W	W	A	A	W	A	A	A	A
ChrIII	17.8	A	A	A	A	W	A	W	W	NA	A	W	A	A	W	W	A	A	A	W	W	W	A	W	A	NA	W	W	A	W	A	A	A	A	W	A	W	A	W	NA	W	W	A	A	W	NA	A	A	A
ChrIII	17.9	A	A	A	A	W	A	W	W	A	A	W	A	A	W	W	A	A	A	W	W	W	A	W	A	NA	W	W	A	W	A	A	A	NA	NA	A	W	A	W	W	W	W	A	A	W	A	A	A	A
ChrIII	18	A	A	A	A	W	A	W	W	A	A	W	A	A	W	W	A	A	A	W	W	W	A	W	A	W	W	W	A	W	A	A	A	A	W	A	W	A	W	W	W	W	A	A	W	A	A	A	A
ChrIII	18.1	NA	A	A	A	W	A	W	W	NA	A	W	NA	A	W	W	NA	A	NA	W	W	W	A	W	A	W	W	W	NA	W	A	A	A	A	W	A	W	A	W	W	W	W	A	A	W	A	A	A	A
ChrIII	18.2	A	A	A	A	W	A	W	W	A	A	W	A	A	W	NA	A	A	A	W	W	W	A	W	A	W	W	NA	A	W	A	A	A	A	W	A	W	A	W	W	W	W	A	A	W	A	A	A	A
ChrIII	18.3	A	A	A	A	W	A	W	W	A	A	W	A	A	W	W	A	A	A	W	W	W	A	W	A	NA	W	W	A	W	A	A	A	NA	W	A	W	A	W	W	W	W	A	A	W	A	A	A	A
ChrIII	18.4	A	A	A	A	W	NA	W	W	A	A	W	A	A	W	W	A	A	A	NA	W	W	A	W	A	NA	W	NA	A	W	A	A	A	NA	NA	A	W	NA	W	NA	W	W	A	A	W	A	A	A	A
ChrIII	18.7	A	A	A	NA	W	A	W	W	A	A	W	A	A	W	W	A	A	W	W	W	W	A	W	A	W	W	A	A	A	A	A	A	A	W	A	W	A	W	W	W	W	A	A	NA	A	A	A	W
ChrIII	18.8	A	A	A	W	W	A	W	W	A	A	W	A	A	W	W	A	A	W	W	W	W	A	W	A	A	W	A	A	A	A	A	A	A	NA	A	W	W	W	W	W	W	A	A	A	A	A	A	W
ChrIII	18.9	A	A	A	W	W	A	W	W	A	A	W	A	A	W	W	A	A	W	W	W	W	A	W	A	A	W	A	A	A	A	A	A	A	W	A	W	W	W	W	W	W	A	A	A	A	A	A	W
ChrIII	19	A	A	A	W	W	A	W	W	A	A	W	A	A	W	W	A	A	W	W	W	W	A	W	A	A	W	A	A	A	A	A	A	A	NA	A	W	W	W	W	W	W	A	A	A	A	A	A	W
ChrIII	19.1	A	A	A	W	W	A	W	W	A	A	W	A	A	W	W	A	A	W	W	W	W	A	W	A	A	W	A	A	A	A	A	A	A	W	A	W	W	W	W	W	W	A	A	A	A	A	A	W
ChrIII	19.4	A	A	A	W	W	A	W	W	A	A	W	A	A	W	W	A	A	W	W	W	W	A	W	A	A	W	A	A	A	A	A	A	A	W	A	W	W	W	W	W	W	A	A	A	A	A	A	W
ChrIII	19.5	A	A	A	W	W	A	W	W	A	A	W	A	A	W	W	A	A	W	W	W	W	A	W	A	A	W	A	A	A	A	A	A	A	W	A	W	W	W	W	W	W	A	A	A	A	A	A	W
ChrIII	19.6	A	A	A	W	W	A	W	W	A	A	W	A	A	W	W	A	A	W	W	W	W	A	W	A	A	W	A	A	A	A	A	A	A	W	A	W	W	W	W	W	W	A	A	A	A	A	A	W
ChrIII	19.7	A	A	A	W	W	A	W	W	A	A	W	A	A	W	W	A	A	W	W	W	W	A	W	A	A	W	A	A	A	A	A	A	A	W	A	W	W	W	W	W	W	A	A	A	A	A	A	W
ChrIII	19.8	A	A	A	W	W	A	W	W	A	A	W	A	A	W	W	NA	A	W	W	W	NA	A	W	A	A	W	A	A	A	A	A	A	A	W	A	W	W	NA	W	W	W	A	A	A	A	A	A	W
ChrIII	19.9	A	A	A	W	W	A	W	W	A	A	W	A	A	W	W	A	A	W	W	NA	W	A	W	A	A	W	A	A	A	A	A	A	A	W	A	W	W	A	W	W	W	A	A	A	A	A	A	W
ChrIII	20	A	A	A	W	W	A	W	W	A	A	W	NA	A	W	W	A	A	W	W	W	W	A	W	A	A	W	A	A	A	A	A	A	A	W	A	W	W	A	W	W	W	A	A	A	A	A	A	W
ChrIII	20.1	A	A	A	W	W	A	W	W	A	A	W	W	A	W	W	A	A	W	W	W	W	A	W	A	A	W	A	A	A	A	A	A	A	W	A	W	W	A	W	W	W	A	A	A	A	A	A	W
ChrIII	20.2	A	A	A	W	W	A	W	W	A	A	W	W	A	W	W	NA	A	W	W	W	W	A	W	A	A	W	A	A	A	A	A	A	A	W	A	W	W	A	W	W	W	A	A	A	A	A	A	W
ChrIII	20.3	A	A	A	W	W	A	W	W	A	A	W	W	A	W	W	A	A	W	W	W	W	A	W	A	A	W	A	A	A	A	A	A	A	W	A	W	W	A	W	W	W	A	A	A	A	A	A	W
ChrIII	20.5	A	A	A	W	W	A	W	W	A	A	W	W	A	W	W	A	A	W	W	W	W	A	W	A	A	W	A	NA	A	A	A	A	A	W	A	W	W	A	W	W	W	A	A	A	A	A	A	W
ChrIII	20.6	A	A	A	W	W	A	W	W	A	A	W	W	A	W	W	A	A	W	W	W	W	A	W	A	A	W	A	A	A	A	A	A	A	W	A	W	W	A	W	W	W	A	A	A	A	A	A	W
ChrIII	20.7	A	A	A	W	W	A	W	W	A	A	W	W	A	W	W	A	A	W	W	W	W	A	W	A	A	W	A	A	A	A	A	A	A	W	A	W	W	A	W	W	W	A	A	A	A	A	A	W
ChrIII	20.8	A	A	A	W	W	A	W	W	A	A	W	W	A	W	W	A	A	W	W	W	W	A	W	A	A	W	A	A	A	A	A	A	A	W	A	W	W	A	W	W	W	A	A	A	A	A	A	W
ChrIII	20.9	A	A	A	W	W	A	W	W	A	A	W	W	A	W	W	A	A	W	W	W	W	A	W	A	A	W	A	A	A	A	A	A	NA	W	A	W	W	A	W	W	W	A	A	A	A	A	A	W
ChrIII	21	A	A	A	W	W	A	W	W	A	A	W	W	A	W	W	A	A	W	W	NA	W	A	W	A	A	W	A	A	A	A	A	A	A	W	A	W	NA	A	W	W	W	A	A	A	A	A	A	W
ChrIII	21.2	A	A	A	W	W	A	W	W	A	A	W	W	A	W	W	A	A	W	W	W	W	A	W	A	A	W	A	A	A	A	A	A	A	W	A	W	W	A	W	W	W	A	A	A	A	A	A	W
ChrIII	21.3	A	A	A	W	W	A	W	W	A	A	W	W	A	W	W	A	A	W	W	NA	W	A	W	A	A	W	A	A	A	A	A	A	A	W	A	W	W	A	W	W	W	A	A	A	A	A	A	W
ChrIII	21.4	A	A	A	W	W	A	W	W	A	A	W	W	A	W	W	A	NA	W	W	W	W	A	W	A	A	W	A	A	A	A	A	A	A	W	A	W	W	A	W	W	W	A	A	A	A	A	A	W
ChrIII	21.5	A	A	A	W	W	A	W	W	NA	NA	W	W	NA	W	W	A	A	W	W	W	W	A	W	A	A	W	A	A	A	A	NA	A	A	W	NA	W	W	A	W	W	W	NA	A	A	NA	A	NA	W
ChrIII	21.6	A	A	A	W	W	A	W	NA	A	A	W	W	A	W	W	NA	A	W	W	W	W	A	W	NA	A	W	A	A	NA	A	A	A	A	W	NA	W	W	NA	W	W	W	A	A	NA	A	A	NA	W
ChrIV	0.3	W	W	W	A	A	W	NA	W	W	W	A	W	A	A	W	A	A	A	A	A	A	W	A	W	A	A	NA	A	W	A	A	A	A	A	A	A	A	A	A	A	A	A	W	W	W	A	W	A
ChrIV	0.4	W	W	W	A	A	W	A	W	W	W	A	W	A	A	W	A	A	A	A	A	A	W	A	W	A	A	A	A	W	A	A	A	A	A	A	A	A	A	A	A	A	A	W	W	W	A	W	A
ChrIV	0.5	W	W	W	NA	A	W	NA	W	W	W	NA	W	A	NA	W	A	A	A	A	A	A	W	NA	W	A	A	NA	A	W	A	NA	A	NA	A	A	NA	A	A	A	NA	A	A	NA	W	W	NA	W	A
ChrIV	0.6	W	W	W	A	A	W	A	W	W	W	A	W	A	A	NA	A	A	A	A	A	A	W	A	W	A	A	A	A	W	A	A	A	A	A	A	A	A	A	A	A	A	A	W	W	W	A	W	A
ChrIV	0.7	W	W	W	A	A	W	A	W	W	W	A	W	A	A	W	A	A	A	A	A	A	W	A	W	A	A	A	A	W	A	A	A	A	A	A	A	A	A	A	A	A	A	W	W	W	A	W	A
ChrIV	0.8	W	NA	W	A	A	W	A	W	W	W	A	W	A	A	W	A	A	A	A	A	A	W	A	NA	A	A	A	A	W	A	A	A	A	A	A	A	A	A	A	A	A	A	W	W	W	A	W	A
ChrIV	0.9	W	W	W	A	A	NA	A	W	W	NA	A	W	A	A	W	NA	A	A	A	A	A	W	A	W	A	A	NA	A	W	A	A	A	A	A	A	A	A	A	A	A	A	A	W	W	NA	A	W	A
ChrIV	1	W	W	W	NA	A	W	A	W	W	W	A	W	A	A	W	A	A	A	A	A	A	W	A	W	A	A	NA	A	W	A	A	A	A	A	A	A	A	A	A	NA	A	A	W	W	W	NA	W	A
ChrIV	1.1	W	W	W	A	A	W	A	W	W	W	A	W	A	A	W	A	A	A	A	A	A	W	A	W	A	A	A	A	W	A	A	A	A	A	A	A	A	A	A	A	A	A	W	W	W	A	W	A
ChrIV	1.2	W	W	W	NA	A	W	NA	W	W	W	A	W	A	A	W	A	A	A	A	A	A	W	A	W	A	A	A	A	W	A	A	A	A	A	A	NA	A	A	A	A	A	A	W	W	W	A	W	A
ChrIV	2.4	W	W	W	NA	A	W	A	W	W	W	A	W	A	NA	W	A	A	A	A	A	A	W	A	W	A	A	NA	NA	W	A	A	A	A	A	A	A	A	A	A	NA	A	A	W	W	W	A	W	A
ChrIV	2.5	W	W	W	A	A	W	A	W	W	W	A	W	A	A	W	A	A	A	A	NA	A	W	A	W	NA	A	A	A	W	A	A	A	NA	A	A	A	A	A	A	A	A	A	W	W	W	NA	W	A
ChrIV	3	W	W	W	A	A	W	A	W	W	W	A	W	A	A	W	A	A	A	A	A	A	W	A	W	A	A	NA	A	W	A	A	A	A	A	A	A	A	A	A	A	A	A	W	W	W	A	W	A
ChrIV	3.6	W	W	W	A	A	W	A	W	W	W	A	W	A	A	W	A	A	A	A	A	A	W	A	W	A	A	NA	A	W	A	A	A	A	A	A	A	A	A	A	A	A	A	W	W	W	A	W	A
ChrIV	3.7	W	W	W	A	A	W	A	W	W	W	A	W	A	A	W	A	A	A	A	A	A	W	A	W	NA	A	A	A	W	A	A	A	NA	A	A	A	A	A	A	A	A	A	W	W	W	NA	W	A
ChrIV	3.9	W	W	W	NA	NA	W	NA	W	W	W	NA	W	A	NA	W	A	NA	NA	A	NA	A	W	NA	W	A	A	NA	A	W	A	A	A	A	A	A	NA	NA	A	A	NA	A	A	W	W	W	NA	W	NA
ChrIV	4	W	W	W	A	A	W	A	W	W	W	A	W	A	A	W	A	NA	A	A	A	A	W	A	W	A	A	NA	A	W	A	A	A	NA	A	A	NA	A	A	A	A	A	A	W	W	W	NA	W	A
ChrIV	4.1	W	W	W	NA	A	W	NA	W	W	W	NA	W	A	NA	W	A	NA	A	A	A	A	W	A	W	NA	A	NA	NA	W	A	A	NA	NA	A	A	NA	NA	A	NA	NA	A	NA	W	W	W	A	W	A
ChrIV	4.3	W	W	W	A	A	W	NA	W	W	NA	A	W	A	A	W	A	A	A	A	A	A	W	A	W	A	A	A	A	W	A	A	A	A	A	A	A	A	A	A	A	A	A	W	W	W	A	W	A
ChrIV	4.4	W	W	W	A	A	W	A	NA	W	W	A	W	A	A	W	A	A	A	A	A	A	W	A	W	A	A	A	A	W	A	A	A	A	A	A	A	A	A	A	A	A	A	W	W	W	A	W	A
ChrIV	4.6	W	W	W	NA	A	W	A	W	W	W	A	W	A	A	W	A	A	NA	A	A	A	W	NA	W	NA	A	NA	NA	W	A	A	NA	NA	A	A	A	A	A	A	NA	A	NA	W	W	W	NA	W	A
ChrIV	4.7	W	W	W	NA	A	W	NA	W	W	W	NA	W	A	A	NA	A	A	NA	A	NA	A	W	NA	W	NA	A	NA	NA	W	A	A	NA	A	A	A	NA	NA	A	A	NA	A	NA	W	W	W	NA	W	A
ChrIV	4.8	W	W	W	A	A	W	A	W	W	W	A	W	A	A	W	W	A	A	A	A	A	W	A	W	A	A	A	A	W	A	A	A	A	A	A	A	A	A	A	A	A	A	W	NA	W	A	W	A
ChrIV	5.1	W	W	W	A	A	W	A	W	W	W	A	W	A	A	NA	W	A	A	A	A	A	W	A	W	NA	A	NA	A	W	A	A	A	A	A	A	A	A	A	A	NA	A	NA	W	W	W	A	W	A
ChrIV	5.2	W	W	W	A	A	W	A	W	W	W	NA	W	A	A	W	W	A	A	A	A	A	W	A	W	A	A	A	A	W	A	A	A	A	A	A	A	A	A	A	A	A	A	W	W	W	A	W	A
ChrIV	5.4	W	W	W	NA	A	W	A	W	W	NA	A	W	A	A	W	W	A	A	A	A	NA	W	A	W	A	A	A	A	W	A	A	A	A	A	A	A	NA	A	A	NA	A	A	W	W	W	NA	W	A
ChrIV	5.7	W	W	W	NA	A	W	A	W	W	W	A	W	NA	A	W	W	A	A	NA	A	A	W	A	W	A	A	NA	NA	W	A	A	A	A	A	NA	NA	A	A	A	A	NA	A	W	W	W	A	W	A
ChrIV	5.9	W	W	W	NA	A	W	A	W	W	W	NA	W	A	A	W	W	NA	NA	A	A	A	W	A	W	NA	A	A	A	W	A	A	A	NA	A	A	NA	NA	A	A	NA	A	NA	W	W	W	NA	W	A
ChrIV	6.5	W	W	W	A	A	W	NA	W	W	W	A	W	A	A	W	W	A	A	A	A	NA	W	A	W	NA	A	NA	A	W	A	A	A	NA	A	A	NA	A	A	A	NA	A	A	W	W	W	NA	W	NA
ChrIV	6.7	W	W	W	NA	A	W	NA	W	W	W	NA	W	A	A	W	W	NA	A	A	A	NA	W	NA	W	NA	A	A	A	W	A	A	NA	A	A	A	NA	NA	A	NA	NA	A	NA	W	W	W	NA	W	A
ChrIV	6.8	W	W	W	A	A	W	A	W	W	W	A	W	A	A	W	W	A	A	A	A	A	W	A	W	A	A	A	A	W	A	A	A	A	A	A	A	A	A	A	A	A	A	W	W	W	A	W	A
ChrIV	6.9	W	NA	W	A	A	W	NA	W	W	W	A	W	A	A	W	NA	A	A	A	A	A	W	A	W	A	A	A	A	W	NA	A	A	NA	NA	A	NA	A	A	A	A	A	A	W	NA	W	NA	W	A
ChrIV	7	W	W	W	A	A	W	A	W	W	W	A	W	A	A	W	W	A	A	A	A	A	W	A	W	A	A	A	A	W	A	A	A	NA	A	A	A	A	A	A	NA	A	A	W	W	W	A	W	A
ChrIV	7.1	W	W	W	A	A	W	A	W	W	W	A	W	A	A	W	W	A	A	A	A	A	W	A	W	A	A	A	A	W	A	A	A	A	A	A	A	A	A	A	A	A	A	W	W	W	NA	W	A
ChrIV	7.6	W	W	NA	A	A	W	A	W	W	W	A	W	A	A	W	W	A	A	A	A	A	W	A	W	A	A	A	A	W	A	A	A	A	A	A	A	A	A	A	A	A	A	NA	W	W	A	W	A
ChrIV	8.3	W	W	W	NA	A	W	A	W	W	W	NA	W	A	A	W	W	NA	A	A	A	A	W	NA	W	NA	A	NA	NA	W	A	A	A	NA	NA	A	A	A	NA	A	NA	NA	NA	W	W	W	NA	W	NA
ChrIV	8.7	W	W	W	NA	A	W	A	W	W	W	A	W	A	A	W	W	A	A	A	A	A	W	NA	W	A	A	A	A	W	A	A	A	A	A	A	A	NA	A	A	A	A	A	W	W	W	A	W	A
ChrIV	8.8	W	W	W	A	A	W	A	W	W	W	A	W	A	A	W	W	A	A	A	A	A	W	A	W	A	A	A	A	W	A	A	A	A	A	A	A	A	A	A	A	A	A	W	W	W	A	W	A
ChrIV	8.9	W	W	W	A	A	W	A	W	W	W	A	W	A	A	W	W	A	A	A	A	A	W	A	W	A	A	A	A	W	A	A	A	A	NA	A	A	A	A	A	A	A	A	W	W	W	A	W	A
ChrIV	9	W	W	W	A	A	W	A	W	W	W	A	W	A	A	W	W	A	A	A	A	A	W	A	W	A	A	A	A	W	A	A	A	A	A	A	A	A	A	A	A	A	A	W	W	W	A	W	A
ChrIV	9.1	W	W	W	A	A	W	A	W	W	W	A	W	A	A	W	W	A	A	A	A	A	W	A	W	A	A	A	A	W	A	A	A	A	A	A	A	A	A	A	A	A	A	W	W	W	A	W	A
ChrIV	9.6	W	W	W	A	A	W	NA	W	W	W	A	W	A	A	W	W	A	A	A	A	A	W	NA	W	A	A	NA	A	W	A	A	A	NA	A	A	NA	A	A	A	NA	A	A	W	W	W	NA	W	A
ChrIV	9.7	W	W	W	A	A	W	A	W	W	W	A	W	A	A	W	W	A	A	A	A	A	W	A	W	A	A	A	A	W	A	A	A	A	A	A	A	A	A	A	A	A	A	W	W	W	NA	W	A
ChrIV	9.8	W	W	W	A	A	W	NA	W	W	W	A	W	A	A	W	W	A	A	A	A	A	W	A	W	A	A	A	A	W	A	A	A	NA	A	A	A	A	A	A	A	A	A	W	W	W	A	W	A
ChrIV	9.9	W	W	W	A	A	W	A	W	W	W	A	W	A	A	W	W	A	A	A	A	A	W	A	W	A	A	A	A	W	A	A	A	A	A	A	A	A	A	A	A	A	A	W	W	W	A	W	A
ChrIV	10	W	W	W	A	A	W	A	W	W	W	A	W	A	A	W	W	A	A	A	A	A	W	A	W	A	A	A	A	W	A	A	A	A	A	A	A	A	A	A	A	A	A	W	W	W	A	W	A
ChrIV	10.1	W	W	W	NA	A	W	A	W	W	W	NA	W	NA	A	W	W	A	A	A	NA	NA	W	A	W	A	A	NA	NA	W	A	A	A	NA	A	A	NA	A	A	A	A	A	A	W	W	W	NA	W	A
ChrIV	10.3	W	W	W	A	A	W	A	W	W	W	A	W	A	A	W	W	A	A	A	A	NA	W	A	W	A	A	NA	A	W	A	A	A	A	NA	A	A	A	A	A	A	A	A	W	W	W	NA	W	A
ChrIV	10.4	W	W	W	A	A	W	A	W	W	W	A	W	A	A	W	W	A	A	A	A	A	W	A	W	A	A	A	A	W	A	A	A	A	A	A	A	A	A	A	A	A	A	W	W	W	A	W	A
ChrIV	10.5	W	W	W	A	A	W	A	W	W	W	A	W	A	A	W	NA	A	A	A	A	A	W	A	W	A	A	A	A	W	A	A	A	A	A	A	A	A	A	A	A	A	A	W	W	W	A	W	A
ChrIV	10.6	W	W	W	A	A	W	A	W	W	W	A	W	A	A	W	W	A	A	A	A	A	W	A	W	A	A	A	A	W	A	A	A	A	A	A	A	A	A	A	A	A	A	W	W	W	A	W	A
ChrIV	10.7	W	W	W	A	A	W	A	W	W	W	A	W	A	A	W	W	A	A	A	A	A	W	A	W	A	A	A	A	W	A	A	A	NA	A	A	A	A	A	A	A	A	A	W	W	W	A	W	A
ChrIV	10.8	W	W	W	A	A	W	A	W	W	W	A	W	A	A	W	W	A	A	A	A	A	W	A	W	A	A	A	A	W	A	A	A	A	A	A	A	A	A	A	A	A	A	W	W	W	A	W	A
ChrIV	11.1	W	W	W	A	A	W	A	W	W	W	A	W	A	A	W	W	A	A	A	A	A	W	A	W	A	A	A	A	W	A	A	A	A	A	A	A	A	A	A	A	A	A	W	W	W	A	W	A
ChrIV	11.2	W	W	W	A	A	W	A	W	W	W	A	W	A	A	W	W	A	A	A	A	A	W	A	W	A	A	A	A	W	A	A	A	A	A	A	A	A	A	A	A	A	A	W	W	W	NA	W	A
ChrIV	11.3	W	W	W	A	A	W	A	W	W	W	A	W	A	A	W	W	NA	A	A	A	A	W	A	W	NA	A	A	A	W	A	A	A	A	A	A	A	A	A	A	A	A	A	W	W	W	A	W	A
ChrIV	11.4	W	W	W	A	A	W	A	W	W	W	A	W	A	A	W	W	A	A	A	A	A	W	A	W	A	A	A	A	W	A	A	A	A	A	A	A	A	A	A	A	A	A	W	W	W	A	W	A
ChrIV	11.5	W	W	W	A	A	W	A	NA	W	W	A	W	A	A	W	NA	A	A	A	A	A	W	A	W	A	A	A	A	W	A	A	A	A	A	A	A	A	A	A	A	A	A	W	W	W	A	W	A
ChrIV	11.6	W	NA	NA	A	A	W	A	W	W	W	A	W	A	A	W	NA	A	A	A	NA	NA	W	A	NA	A	A	A	A	NA	A	A	A	A	A	A	A	A	A	A	A	A	A	NA	NA	NA	A	W	A
ChrIV	11.7	W	W	W	A	A	W	A	W	W	W	A	W	A	A	W	W	A	A	A	A	A	W	A	W	A	A	A	A	W	A	A	A	A	A	A	A	A	A	A	A	A	A	W	W	W	A	W	A
ChrIV	11.8	W	W	W	A	A	W	A	W	W	W	A	W	A	A	W	W	A	A	A	A	A	W	A	W	A	A	A	A	W	A	A	A	A	A	A	A	A	A	A	A	A	A	W	W	W	A	W	A
ChrIV	11.9	W	W	W	A	A	W	A	W	W	W	A	W	A	A	NA	W	A	A	A	A	A	W	NA	W	A	A	A	A	W	A	A	A	A	A	A	A	A	A	A	A	A	A	W	W	W	A	W	A
ChrIV	12.1	W	W	W	A	A	W	A	W	W	W	A	W	A	A	W	NA	A	A	A	A	A	W	A	W	A	A	A	A	W	A	A	A	A	A	A	A	A	A	A	A	A	A	W	W	W	A	W	A
ChrIV	12.3	W	W	W	A	A	W	A	W	W	W	A	W	A	A	W	W	A	A	A	A	A	W	A	W	A	A	A	A	W	A	A	A	A	A	A	A	A	A	A	A	A	A	W	W	W	A	W	A
ChrIV	12.4	W	W	W	A	A	W	A	W	W	W	A	W	A	A	W	W	A	A	A	A	A	W	A	W	NA	A	A	A	W	A	A	A	A	A	A	A	A	A	A	A	A	A	W	W	W	A	W	A
ChrIV	12.5	W	W	W	A	A	W	A	W	W	W	A	W	A	A	W	W	A	A	A	A	A	W	A	W	A	A	A	A	W	A	A	A	A	A	A	A	A	A	A	A	A	A	W	W	W	A	W	A
ChrIV	12.6	W	W	W	A	A	W	A	NA	W	W	A	W	A	A	W	W	A	A	A	NA	NA	W	A	W	A	A	A	A	W	A	A	A	A	A	A	A	A	A	A	A	A	A	W	W	W	A	W	A
ChrIV	12.7	W	W	W	A	A	W	A	W	W	W	A	W	A	A	W	W	A	A	A	A	A	W	A	W	A	A	NA	A	W	A	A	A	A	A	A	A	A	A	A	A	A	A	W	NA	W	A	W	A
ChrIV	12.8	W	W	W	A	A	W	A	W	W	W	A	W	A	A	W	W	A	A	A	A	A	W	A	W	A	A	A	A	W	A	A	A	A	A	A	A	A	A	A	A	A	A	W	W	W	A	W	A
ChrIV	12.9	W	W	W	NA	NA	W	A	W	W	W	A	W	A	A	W	W	A	A	A	A	A	W	NA	W	A	A	NA	A	W	A	A	A	NA	A	A	A	A	A	A	NA	A	A	W	W	W	A	W	A
ChrIV	13	W	W	W	A	A	W	A	W	W	W	A	W	A	A	W	W	A	A	A	A	A	W	A	W	A	A	NA	A	W	A	A	A	A	A	A	A	A	A	A	A	A	A	W	W	W	NA	W	A
ChrIV	13.1	W	W	W	A	A	W	A	W	W	W	A	W	A	A	W	W	A	A	A	A	A	W	A	W	A	A	A	A	W	A	A	A	A	A	A	A	A	A	A	A	A	A	W	W	W	A	W	A
ChrIV	13.2	W	W	W	A	A	W	NA	W	W	W	A	W	A	A	W	W	A	A	A	A	A	W	NA	W	A	A	NA	A	W	A	A	A	A	A	A	A	A	A	A	A	A	A	W	W	W	A	W	A
ChrIV	13.3	W	W	W	A	A	W	A	W	W	W	A	W	A	A	W	W	A	A	A	A	A	W	A	W	A	A	A	A	W	A	A	A	A	A	A	A	A	A	A	A	A	A	W	W	W	A	W	A
ChrIV	13.4	W	W	W	A	A	W	A	W	W	W	A	W	A	A	W	NA	A	A	A	A	A	W	A	W	A	A	A	A	W	A	A	A	A	A	A	A	A	A	A	A	A	A	W	W	W	A	W	A
ChrIV	13.5	W	W	W	A	A	W	A	W	W	W	A	W	A	A	W	W	A	A	A	A	A	W	A	W	A	A	A	A	W	A	A	A	A	A	A	A	A	A	A	A	A	A	W	W	W	A	W	A
ChrIV	13.6	W	W	W	A	A	W	A	W	W	W	A	W	A	A	W	W	A	A	A	A	A	W	A	W	A	A	A	A	W	A	A	A	A	A	A	A	A	A	A	NA	A	A	W	W	W	A	W	A
ChrIV	13.7	W	W	W	A	A	W	A	W	W	W	A	W	A	A	W	W	A	A	A	A	A	W	A	W	A	A	A	A	W	A	A	A	A	A	A	A	A	A	A	A	A	A	W	W	W	A	W	A
ChrIV	13.8	W	W	W	A	A	W	A	W	W	W	A	W	A	A	W	W	A	A	A	A	A	W	A	W	NA	A	A	A	W	A	A	A	A	A	A	A	A	A	A	A	A	A	W	W	W	A	W	A
ChrIV	13.9	W	W	W	A	A	W	A	W	W	W	A	W	A	A	W	W	A	A	A	A	A	W	A	W	A	A	A	A	W	A	A	A	A	A	A	A	A	A	A	A	A	A	W	W	W	A	W	A
ChrIV	14	W	W	W	A	A	W	A	W	W	W	A	W	A	A	W	W	A	A	A	A	A	W	A	W	A	A	A	A	W	A	A	A	A	A	A	A	A	A	A	A	A	A	W	W	W	A	W	A
ChrIV	14.1	W	W	W	A	A	W	A	W	W	W	A	W	A	NA	W	NA	A	A	A	A	A	W	A	NA	A	A	A	A	W	A	A	A	A	A	A	A	A	A	A	A	A	A	W	W	NA	A	W	A
ChrIV	14.2	W	W	W	A	A	W	A	W	W	W	A	W	A	A	W	W	A	A	A	A	A	W	A	W	A	A	A	A	W	A	A	A	A	A	A	A	A	A	A	A	A	A	W	W	W	A	W	A
ChrIV	14.3	W	W	W	A	A	W	A	W	W	W	A	W	A	A	W	W	A	A	A	A	A	W	A	W	A	A	A	A	W	A	A	A	A	A	A	A	A	A	A	A	A	A	W	W	W	A	W	A
ChrIV	14.4	W	W	W	A	A	W	A	W	W	W	A	W	A	A	W	W	NA	A	A	A	A	W	A	W	A	A	NA	A	W	A	A	A	A	A	A	A	A	A	A	A	A	A	W	W	W	A	W	A
ChrIV	14.5	W	W	W	A	A	W	A	NA	W	W	A	W	A	A	W	W	A	A	A	A	A	W	A	W	A	A	A	A	W	A	A	A	NA	A	A	A	A	A	A	A	A	A	W	W	W	A	W	A
ChrIV	14.6	W	W	W	A	A	W	A	W	W	W	A	W	A	A	W	W	A	A	A	A	A	W	A	W	A	A	A	A	W	A	A	A	A	A	A	A	A	A	A	A	A	A	W	W	W	A	W	A
ChrIV	14.7	W	NA	NA	A	A	W	A	W	W	W	A	W	A	A	W	NA	A	A	A	A	NA	W	A	NA	A	A	NA	A	W	A	NA	A	A	A	A	A	A	A	A	A	A	A	NA	NA	W	NA	NA	A
ChrIV	14.8	W	W	W	A	A	W	A	W	W	W	A	W	A	A	W	W	A	A	A	A	A	W	A	W	A	A	A	A	W	A	A	A	A	A	A	A	A	A	A	A	A	A	W	W	W	A	W	A
ChrIV	14.9	W	W	W	A	A	W	A	W	W	W	A	W	A	A	W	W	A	A	A	NA	A	W	A	W	A	A	A	A	W	A	A	A	A	A	A	A	A	A	A	A	A	A	W	W	W	NA	W	A
ChrIV	15	W	W	W	A	A	W	A	W	W	W	A	W	A	A	W	W	A	A	A	A	A	W	A	W	A	A	A	A	W	A	A	A	A	A	A	A	A	A	A	A	A	A	W	W	W	A	W	A
ChrIV	15.1	W	W	W	A	A	W	A	W	W	W	A	W	A	A	W	W	A	A	A	A	A	W	A	W	A	A	A	A	W	A	A	A	A	A	A	A	A	A	A	A	A	A	W	W	W	A	W	A
ChrIV	15.2	W	W	W	A	A	W	A	W	W	W	A	W	A	A	W	W	A	A	A	A	A	W	A	W	A	A	A	A	W	A	A	A	A	A	A	A	A	A	A	A	A	A	W	W	W	A	W	A
ChrIV	15.3	W	W	W	A	A	W	A	W	W	W	A	W	A	A	W	W	A	A	A	A	A	W	A	W	A	A	A	A	W	A	A	A	A	A	A	A	A	A	A	A	A	A	W	W	W	A	W	A
ChrIV	15.4	W	W	W	A	A	W	A	W	W	W	A	W	A	A	W	W	A	A	A	A	A	W	A	W	A	A	A	A	W	A	A	A	A	A	A	A	A	A	A	A	A	A	W	W	W	A	W	A
ChrIV	15.5	W	W	W	A	A	W	A	W	W	W	A	W	A	A	W	NA	A	A	A	A	A	W	A	W	A	A	A	A	W	A	A	A	A	A	A	A	A	A	A	A	A	A	W	W	W	A	W	A
ChrIV	15.6	W	W	W	A	A	W	A	W	W	W	A	W	A	A	W	W	A	A	A	A	A	W	A	W	A	A	A	A	W	A	A	A	A	A	A	A	A	A	A	A	A	A	W	W	W	A	W	A
ChrIV	15.7	W	W	W	A	A	W	A	W	W	W	A	W	A	A	W	W	A	A	A	A	A	W	A	W	A	A	A	A	W	A	A	A	A	A	A	A	A	A	A	A	A	A	W	W	W	A	W	A
ChrIV	15.8	W	W	W	A	A	W	A	W	W	W	A	W	A	A	W	W	A	A	A	A	A	W	A	W	A	A	A	A	W	A	A	A	A	A	A	A	A	A	A	A	A	A	W	W	W	A	W	A
ChrIV	15.9	W	W	W	A	A	W	A	W	W	W	A	W	A	A	W	W	A	A	A	A	A	W	A	W	A	A	A	A	W	A	A	A	NA	A	A	A	A	A	A	A	A	A	W	W	W	A	W	A
ChrIV	16	W	W	W	A	A	W	A	W	W	W	A	W	A	A	W	W	A	A	A	NA	A	W	A	W	A	A	A	A	W	A	A	A	A	A	A	A	A	A	A	A	A	A	W	W	W	A	W	A
ChrIV	16.1	W	W	W	A	A	W	A	W	W	W	A	W	A	A	W	NA	A	A	A	A	NA	W	A	W	A	A	A	A	W	A	A	A	A	A	A	A	A	A	A	A	A	A	W	W	W	A	W	A
ChrIV	16.2	W	W	W	A	A	W	A	W	W	W	A	W	A	A	W	W	A	A	A	A	A	W	A	W	A	A	A	A	W	A	A	A	A	A	A	A	A	A	A	A	A	A	W	W	W	A	W	A
ChrIV	16.3	W	W	W	A	A	W	A	W	W	W	A	W	A	A	W	W	A	A	A	A	A	W	A	W	A	A	NA	A	W	A	A	A	A	A	A	A	A	A	A	A	A	A	W	W	W	A	W	A
ChrIV	16.4	W	W	W	A	A	W	A	W	W	W	A	W	A	A	W	W	A	A	A	A	A	W	A	W	A	A	A	NA	W	A	A	A	A	A	A	A	A	A	A	A	A	A	W	W	W	A	W	A
ChrIV	16.5	W	W	W	A	A	W	A	W	W	W	A	W	A	A	W	W	A	A	A	A	A	W	A	W	A	A	A	A	W	A	A	A	A	A	A	A	A	A	A	A	A	A	W	W	W	A	W	A
ChrIV	16.6	W	NA	NA	A	A	W	A	W	W	W	A	W	NA	A	W	NA	A	NA	A	A	A	W	A	NA	A	A	A	NA	NA	A	A	A	NA	NA	A	A	A	A	A	A	A	A	NA	NA	NA	A	NA	A
ChrIV	16.7	W	W	W	A	A	W	A	W	W	W	A	W	A	A	W	W	A	A	A	A	NA	W	A	W	A	A	NA	A	W	A	A	A	NA	A	A	A	A	A	A	NA	A	A	W	W	W	A	W	A
ChrIV	16.8	W	W	W	A	A	W	A	W	W	W	A	W	A	A	W	W	A	A	A	A	A	W	A	W	A	A	A	A	W	A	A	A	A	A	A	A	A	A	A	A	A	A	W	W	W	A	W	A
ChrIV	16.9	W	W	W	A	A	W	A	W	W	W	A	W	A	A	W	W	A	A	A	A	A	W	A	W	A	A	A	A	W	A	A	A	A	A	A	A	A	A	A	A	A	A	W	W	W	A	W	A
ChrIV	17	W	W	W	A	A	W	A	W	W	W	A	W	NA	A	NA	NA	A	A	A	A	A	W	A	W	A	A	A	A	W	A	A	A	A	NA	A	A	A	A	A	A	A	A	W	W	W	A	W	A
ChrIV	17.1	W	W	W	NA	A	W	NA	W	W	W	A	W	A	A	W	W	A	A	A	NA	A	W	NA	W	NA	NA	NA	A	W	NA	A	NA	NA	A	A	NA	A	A	A	NA	A	A	W	W	W	A	W	A
ChrIV	17.2	W	W	W	A	A	W	A	W	W	W	A	W	A	A	W	W	A	A	A	A	A	W	A	W	A	A	A	A	W	A	A	A	A	A	A	A	A	A	A	A	A	A	W	W	W	A	W	A
ChrIV	17.3	W	NA	W	A	A	W	A	W	W	W	A	W	A	A	W	NA	A	A	NA	A	A	W	A	NA	A	NA	A	A	W	A	A	A	A	A	A	A	A	A	A	A	A	A	NA	NA	NA	A	W	A
ChrIV	17.4	W	W	NA	A	A	W	A	NA	W	W	A	W	NA	A	W	NA	A	A	NA	A	A	W	A	NA	A	A	A	A	W	A	A	A	A	A	NA	A	A	A	A	A	NA	A	W	NA	W	A	W	A
ChrIV	17.5	W	NA	NA	A	A	W	A	W	W	W	A	W	A	A	W	W	A	A	A	A	A	W	A	NA	A	A	A	NA	W	A	A	A	A	A	A	A	A	A	A	A	A	A	W	NA	NA	A	NA	A
ChrIV	17.6	W	W	W	A	A	W	A	NA	W	W	A	W	A	A	W	W	A	A	A	A	A	W	A	NA	A	A	A	A	W	A	A	A	A	NA	A	A	A	A	A	A	A	A	NA	NA	NA	A	NA	A
ChrIV	17.7	W	W	W	A	A	W	A	W	W	W	A	W	A	A	W	NA	A	A	A	A	A	W	A	W	A	A	A	A	W	A	A	A	A	A	A	A	A	A	A	A	A	A	W	W	W	A	W	A
ChrIV	17.8	W	NA	NA	A	A	W	A	W	W	W	A	W	A	A	W	NA	A	A	A	A	A	W	A	NA	A	NA	A	A	W	A	A	A	A	A	A	A	A	A	A	A	A	A	NA	W	W	A	NA	A
ChrIV	17.9	W	NA	NA	A	A	W	A	NA	W	W	A	W	A	A	W	W	A	NA	A	A	NA	W	A	NA	A	A	A	A	W	A	A	A	A	A	A	A	A	A	A	A	NA	A	NA	NA	W	A	NA	A
ChrIV	18	W	NA	NA	A	A	W	A	NA	W	W	A	W	A	A	W	NA	A	A	A	NA	A	W	A	NA	A	A	A	A	W	A	A	A	A	A	A	A	A	A	A	A	A	A	W	W	NA	A	W	A
ChrIV	18.2	W	W	W	A	A	W	A	W	W	W	A	W	A	A	W	NA	A	A	A	A	NA	W	A	W	A	A	A	A	W	A	A	A	A	A	A	A	A	A	A	A	A	A	W	W	NA	A	W	A
ChrIV	18.3	W	W	W	A	A	W	A	W	W	W	A	W	A	A	W	W	A	A	A	A	A	W	A	W	A	A	A	A	W	A	A	A	A	A	A	A	A	A	A	A	A	A	W	W	W	A	W	A
ChrIV	18.4	W	W	W	A	A	W	A	W	W	W	A	W	A	A	NA	NA	A	A	A	A	A	W	A	W	A	A	A	A	W	A	A	A	A	A	A	A	A	A	A	A	A	A	W	W	W	A	W	A
ChrIV	18.5	W	NA	W	A	A	W	A	W	W	W	A	W	A	A	W	W	A	A	A	NA	A	W	A	W	A	A	A	A	W	A	A	A	A	A	A	A	A	A	A	A	A	A	NA	NA	NA	A	W	A
ChrIV	18.6	W	W	W	A	A	W	A	NA	W	W	A	W	A	A	W	W	A	A	A	A	NA	W	A	W	A	A	A	A	W	A	A	A	A	A	A	A	A	A	A	A	A	A	W	W	W	A	W	A
ChrIV	18.8	W	W	W	A	A	W	A	W	W	W	A	W	A	A	W	NA	A	A	A	A	A	W	A	W	A	A	A	A	W	A	A	A	A	A	A	A	A	A	A	A	A	A	W	W	W	A	W	A
ChrIV	18.9	W	W	W	A	A	W	A	W	W	W	A	W	A	A	W	W	A	A	A	NA	A	W	A	W	A	A	A	A	W	A	A	A	A	A	A	A	A	A	A	A	A	A	W	W	W	A	W	A
ChrIV	19.1	W	W	W	A	A	W	A	W	W	W	A	W	A	A	W	NA	A	A	A	A	A	W	A	W	A	A	A	A	W	A	A	A	A	A	A	A	A	A	A	A	A	A	W	W	W	A	W	A
ChrIV	19.2	W	W	W	A	A	W	A	W	W	W	A	W	A	A	W	W	A	A	A	A	A	W	A	W	A	A	A	A	W	A	A	A	A	A	A	A	A	A	A	A	A	A	W	W	W	A	W	A
ChrIV	19.3	W	W	W	A	A	W	A	W	W	W	A	W	A	A	W	W	A	A	A	A	A	W	A	W	A	A	A	A	W	A	A	A	A	A	A	A	A	A	A	A	A	A	W	W	W	A	W	A
ChrIV	19.4	W	W	W	A	A	W	A	W	W	W	A	W	A	A	W	W	A	A	A	A	A	W	A	W	A	A	A	A	W	A	A	A	A	A	A	A	A	A	A	A	A	A	W	W	W	A	W	A
ChrIV	19.5	W	W	W	A	A	W	A	W	W	W	A	W	A	A	W	NA	A	A	A	A	A	W	A	W	A	A	A	A	W	A	A	A	A	A	A	A	A	A	A	A	A	A	W	W	W	A	W	A
ChrIV	19.6	W	W	W	A	A	W	A	W	W	W	A	W	A	A	W	W	A	A	A	A	A	W	A	W	A	A	NA	A	W	A	A	A	A	A	A	A	A	A	A	A	A	A	W	W	W	A	W	A
ChrIV	19.7	W	W	W	A	A	W	A	W	W	W	A	W	A	A	W	W	A	A	A	A	A	W	A	W	A	A	A	A	W	A	A	A	A	A	A	A	A	A	A	A	A	A	W	W	W	A	W	A
ChrIV	19.8	W	W	W	A	A	W	A	W	W	W	A	W	A	A	W	W	A	A	A	A	A	W	A	W	A	A	A	A	W	A	A	A	NA	A	A	A	A	A	A	A	A	A	W	W	W	NA	W	A
ChrIV	19.9	W	W	W	A	A	W	A	W	W	W	A	W	A	A	W	W	A	A	A	A	A	W	A	W	A	A	NA	A	W	A	A	A	A	NA	A	A	A	A	A	A	A	A	W	W	W	NA	W	A
ChrIV	20	W	W	W	A	A	W	A	W	W	W	A	W	A	A	W	W	A	A	A	A	A	W	A	W	A	A	A	A	W	A	A	A	A	A	A	A	A	A	A	A	A	A	W	W	W	A	W	A
ChrIV	20.1	W	W	W	A	A	W	A	W	W	W	A	W	A	A	NA	W	A	A	A	A	A	W	A	W	A	A	A	A	W	A	A	A	A	A	A	A	A	A	A	A	A	A	W	W	W	A	W	A
ChrIV	20.2	W	W	W	A	A	W	A	W	W	W	A	W	A	A	W	W	A	A	A	A	A	W	A	W	A	A	A	A	W	A	A	A	A	A	A	A	A	A	A	A	A	A	W	W	W	A	W	A
ChrIV	20.3	W	W	W	A	A	W	A	W	W	W	A	W	A	A	W	W	A	A	A	A	A	W	A	W	A	A	NA	A	W	A	A	A	A	A	A	A	A	A	A	A	A	A	W	W	W	NA	W	A
ChrIV	20.4	W	W	W	A	A	W	A	W	W	W	A	W	A	A	W	W	A	A	A	A	A	W	A	W	A	A	NA	A	W	A	A	A	A	A	A	A	A	A	A	A	A	A	W	W	W	NA	W	A
ChrIV	20.5	W	W	W	A	A	W	A	W	W	W	A	W	A	A	W	W	A	A	A	A	A	W	A	W	A	A	W	A	W	A	A	A	A	A	A	A	A	A	A	A	A	A	W	W	W	A	W	A
ChrIV	20.6	W	W	W	A	A	W	A	W	W	W	A	W	A	A	W	W	A	A	A	A	A	W	NA	W	A	A	W	A	W	A	A	A	A	A	A	A	A	A	A	A	A	A	W	W	W	A	W	A
ChrIV	20.7	W	W	W	A	NA	W	NA	NA	W	W	A	W	A	A	W	NA	A	NA	A	A	A	W	A	W	A	NA	W	A	W	A	NA	A	A	A	NA	A	A	NA	A	A	NA	A	W	NA	NA	A	W	A
ChrIV	20.8	W	W	W	A	A	W	A	W	W	W	A	W	A	A	W	W	A	A	A	A	A	W	A	W	A	A	W	A	W	A	A	A	A	A	A	A	A	A	A	A	A	A	W	W	W	A	W	A
ChrIV	20.9	W	W	W	A	A	W	A	W	W	W	A	W	A	A	W	W	A	A	A	A	A	W	A	W	A	A	W	A	W	A	A	A	A	A	A	A	A	A	A	A	A	A	W	W	W	A	W	A
ChrIV	21	W	W	W	A	A	W	A	W	W	W	A	W	A	A	W	W	A	A	A	A	A	W	A	W	A	A	W	A	W	A	A	A	A	A	A	A	A	A	A	A	A	A	W	W	W	A	W	A
ChrIV	21.1	W	W	W	A	A	W	A	W	W	W	A	W	A	A	W	W	A	A	A	A	A	W	A	W	A	A	W	A	W	A	A	A	A	A	A	A	A	A	A	A	A	A	W	W	W	A	W	A
ChrIV	21.2	W	W	W	A	A	W	A	W	W	W	A	W	A	A	W	W	A	A	A	A	A	W	A	W	A	A	W	A	W	A	A	A	A	A	A	A	A	A	A	A	A	A	W	W	W	A	W	A
ChrIV	21.3	W	W	W	A	A	W	A	W	W	W	A	W	A	A	NA	W	A	A	A	A	A	W	A	W	A	A	W	A	W	A	A	A	A	A	A	A	A	A	A	A	A	A	W	W	W	A	W	A
ChrIV	21.4	W	W	W	A	A	W	A	W	W	W	A	W	A	A	W	W	A	A	A	A	A	W	A	W	A	A	W	A	W	A	A	A	A	A	A	A	A	A	A	A	A	A	W	W	W	A	W	A
ChrIV	21.5	W	NA	W	A	A	W	A	W	W	W	A	W	A	A	NA	W	NA	A	A	A	A	W	A	W	A	A	W	A	W	A	A	A	A	A	A	A	A	A	A	A	A	A	W	W	W	A	W	A
ChrIV	21.6	W	W	W	A	A	W	A	W	W	W	A	W	A	A	W	W	A	A	A	A	A	W	A	W	A	A	W	A	W	A	A	A	A	A	A	A	A	A	A	A	A	A	W	W	W	A	W	A
ChrIV	21.7	W	W	W	A	A	W	A	W	W	W	NA	W	A	A	W	W	A	A	A	A	A	W	A	W	NA	A	W	A	W	A	A	NA	NA	A	A	NA	A	A	A	A	A	A	W	W	W	NA	W	A
ChrIV	21.8	W	W	W	A	A	W	A	W	W	W	A	W	A	NA	W	W	NA	A	A	A	A	W	A	W	A	A	W	A	W	A	A	NA	NA	A	A	NA	A	A	A	A	A	A	W	W	W	A	W	A
ChrIV	21.9	W	W	W	A	A	W	A	W	W	W	A	W	A	NA	W	W	A	A	A	A	NA	W	A	W	A	A	W	A	W	A	A	A	A	A	A	A	A	A	A	A	A	A	W	W	W	A	W	A
ChrIV	22	W	W	W	NA	A	W	A	W	W	W	NA	W	A	A	W	W	A	A	NA	A	A	W	A	W	NA	A	W	A	W	A	A	NA	NA	A	A	NA	A	A	A	A	NA	NA	W	W	W	NA	W	A
ChrIV	22.1	W	W	W	A	A	W	A	W	W	W	A	W	A	A	W	W	NA	A	A	A	A	W	A	W	A	A	W	A	W	A	A	A	A	A	A	A	A	A	A	A	A	A	W	W	W	A	W	A
ChrIV	22.2	W	W	W	A	A	W	A	W	W	W	A	W	A	A	W	W	A	A	A	A	A	W	A	W	A	A	W	A	W	A	A	A	A	A	A	A	A	A	A	A	A	A	W	W	W	A	W	A
ChrIV	22.3	W	W	W	A	A	W	A	W	W	W	A	W	A	A	W	NA	A	A	A	A	A	W	A	W	A	A	W	A	W	A	A	A	NA	A	A	A	A	A	A	A	A	A	W	W	W	A	W	A
ChrIV	22.4	W	W	W	A	A	W	A	W	W	W	A	W	A	A	W	W	A	A	A	A	A	W	A	W	A	A	W	A	W	A	A	A	A	A	A	A	A	A	A	A	A	A	W	W	W	A	W	A
ChrIV	22.5	W	W	W	A	A	W	A	W	W	W	A	W	A	A	NA	W	A	A	A	A	A	W	A	W	A	A	W	A	W	A	A	A	A	A	A	A	A	A	A	A	A	A	W	W	W	A	W	A
ChrIV	22.6	W	W	W	A	A	W	A	W	W	W	A	W	A	A	W	W	A	A	A	A	A	W	A	W	A	A	W	A	W	A	A	A	A	A	A	A	A	A	A	A	A	A	W	W	W	A	W	A
ChrIV	22.7	W	W	W	A	A	W	A	W	W	W	A	W	A	A	W	W	A	A	A	A	NA	W	A	W	A	A	W	A	W	A	A	A	A	A	A	A	A	A	A	A	A	A	W	W	W	A	W	A
ChrIV	22.8	W	W	W	A	A	W	A	W	W	W	A	W	A	A	W	W	A	A	A	A	A	W	A	W	A	A	W	A	W	A	A	A	A	A	A	A	A	A	A	A	A	A	W	W	W	A	W	A
ChrIV	22.9	W	W	W	A	A	W	A	W	W	W	A	W	A	A	W	W	A	A	A	A	A	W	A	W	A	W	W	A	W	A	A	A	A	A	A	A	A	A	A	A	A	A	W	W	W	A	W	A
ChrIV	23	W	W	W	A	A	W	A	W	W	W	A	W	A	A	W	W	A	A	A	A	NA	W	NA	W	A	W	W	A	W	A	A	A	NA	A	A	NA	A	A	A	A	A	A	W	W	W	A	W	A
ChrIV	23.1	W	W	W	A	A	W	A	W	W	W	A	W	A	NA	NA	W	A	A	A	A	A	W	A	W	A	W	W	A	W	A	A	A	A	A	A	W	A	A	A	A	A	A	W	W	W	A	W	A
ChrIV	23.2	W	W	W	A	A	W	A	W	W	W	A	W	A	A	W	W	A	A	A	A	A	W	A	W	A	W	W	A	W	A	A	A	A	A	A	W	A	A	A	A	A	A	W	W	W	A	W	A
ChrIV	23.3	W	W	W	A	A	W	A	W	W	W	A	W	A	A	W	W	A	A	A	A	A	W	A	W	A	W	W	A	W	A	A	A	A	A	A	W	A	A	A	A	A	A	W	W	W	NA	W	A
ChrIV	23.4	W	W	W	A	A	W	A	W	W	W	A	W	A	A	W	W	A	A	A	A	A	W	A	W	A	W	W	A	W	A	A	A	A	A	A	W	A	A	A	A	A	A	W	W	W	A	W	A
ChrIV	23.5	W	W	W	A	A	W	A	W	W	W	A	NA	A	A	W	W	A	A	A	A	A	W	A	W	NA	W	W	A	W	A	A	A	A	A	A	W	A	A	A	A	A	A	W	W	W	A	W	A
ChrIV	23.6	W	W	W	A	A	W	A	W	W	W	A	W	A	A	W	W	A	A	A	A	A	W	NA	W	W	W	W	A	W	A	A	A	A	A	A	W	A	A	A	A	A	A	W	W	W	A	W	A
ChrIV	23.7	W	W	W	A	A	W	A	W	W	W	A	W	A	A	W	W	A	A	A	NA	A	W	A	W	W	W	W	A	W	A	A	NA	A	A	A	W	A	A	A	A	A	A	W	W	W	A	W	A
ChrIV	23.8	W	W	W	A	A	W	A	W	W	W	A	W	A	A	W	W	A	A	A	A	A	W	A	W	W	W	W	A	W	A	A	W	A	A	A	W	A	A	A	A	A	A	W	W	W	A	W	A
ChrIV	23.9	W	W	W	A	A	W	A	W	W	W	A	W	A	A	W	W	A	A	A	A	A	W	A	W	W	W	W	A	W	A	A	W	A	A	A	W	A	A	A	A	A	A	W	W	W	A	W	A
ChrIV	24	W	W	W	A	A	W	A	W	W	W	A	W	A	A	W	W	A	A	A	A	A	W	NA	W	W	W	W	A	W	A	A	W	NA	A	A	W	A	A	A	A	A	A	W	W	W	A	W	A
ChrIV	24.1	W	W	W	A	A	W	A	W	W	W	A	W	A	A	W	W	A	A	A	A	A	W	A	W	W	W	W	A	W	A	A	W	A	A	A	W	A	A	A	A	A	A	W	W	W	A	W	A
ChrIV	24.2	W	W	W	A	A	W	A	W	W	W	A	W	A	A	W	W	A	A	A	A	A	W	A	W	W	W	NA	A	W	A	A	W	A	A	A	W	A	A	A	A	A	A	W	W	W	A	W	A
ChrIV	24.3	W	W	W	A	A	W	A	NA	W	W	A	W	A	A	W	W	A	A	A	A	A	W	A	NA	W	W	W	NA	W	A	A	W	A	A	A	W	A	A	A	A	A	A	W	NA	NA	A	W	A
ChrIV	24.4	W	W	W	A	A	W	A	A	W	W	A	W	A	A	W	W	A	A	A	A	A	W	A	W	W	W	W	A	W	A	A	W	A	A	A	W	A	A	A	A	A	A	W	W	W	A	W	A
ChrIV	24.5	W	W	W	NA	A	W	A	A	W	W	A	W	A	A	W	W	A	A	A	A	A	W	A	W	W	W	W	A	W	A	A	W	NA	A	A	W	A	A	A	A	A	A	W	W	W	NA	W	A
ChrIV	24.6	W	NA	W	A	A	W	A	A	W	W	A	W	A	A	W	W	A	A	A	A	A	W	A	W	W	W	NA	A	W	A	A	W	A	A	A	W	A	A	A	A	A	A	W	W	W	A	W	A
ChrIV	24.7	W	W	W	A	A	W	A	A	W	W	A	W	A	A	W	W	A	A	A	A	A	W	A	W	W	W	W	A	W	A	A	W	A	A	A	W	A	A	A	A	A	A	W	W	W	A	W	A
ChrIV	24.8	W	W	W	A	A	W	A	A	W	W	A	W	A	A	W	W	NA	A	A	A	A	W	A	W	W	W	W	A	W	A	A	W	A	A	A	W	A	A	A	A	A	A	W	W	W	A	W	A
ChrIV	24.9	W	W	W	A	A	W	A	A	W	W	A	W	A	A	W	NA	W	A	A	A	W	W	A	W	W	W	W	A	W	A	A	W	A	A	A	W	A	A	A	A	A	A	W	W	W	A	W	A
ChrIV	25	W	W	W	A	A	W	A	A	W	W	A	W	A	A	W	W	W	A	A	A	W	W	A	W	W	W	W	A	W	A	A	W	A	A	A	W	A	A	A	A	A	A	W	W	W	A	W	A
ChrIV	25.1	W	W	W	A	A	W	A	A	W	W	A	W	A	A	W	W	W	A	A	A	W	W	A	W	W	W	W	A	W	A	A	W	A	A	A	W	A	A	A	A	A	A	W	W	W	A	W	A
ChrIV	25.2	W	W	W	A	A	W	A	A	W	W	A	W	A	A	W	W	W	A	A	A	W	W	A	W	W	W	W	A	W	A	A	W	A	A	A	W	A	A	A	A	A	A	W	W	W	A	W	A
ChrIV	25.3	W	W	W	A	A	W	A	A	W	W	A	NA	A	A	NA	W	W	A	A	A	W	W	A	W	W	W	W	A	W	A	A	W	A	A	A	W	A	A	A	A	A	A	W	W	W	A	W	A
ChrIV	25.4	W	W	W	A	A	W	A	A	W	W	A	NA	A	A	W	W	W	A	A	A	NA	W	A	W	W	W	W	NA	W	A	A	W	A	A	A	W	A	A	A	A	A	A	W	W	W	A	W	A
ChrIV	25.5	W	W	W	A	A	W	A	A	W	W	A	NA	A	A	W	W	W	A	A	A	NA	W	A	W	W	NA	W	W	W	A	A	W	A	NA	A	W	A	A	A	A	A	A	NA	W	W	A	W	A
ChrIV	25.7	W	W	W	NA	A	W	NA	NA	W	W	A	NA	A	A	W	W	W	NA	A	A	W	W	NA	W	W	W	W	NA	W	A	A	W	A	A	A	W	NA	A	A	A	A	A	W	W	W	NA	W	NA
ChrIV	25.8	W	W	W	A	A	W	A	A	W	W	A	W	A	A	W	W	W	A	A	A	W	W	A	W	W	W	W	NA	W	A	A	W	A	A	A	W	A	A	A	A	A	A	W	W	W	A	W	A
ChrIV	26	W	W	W	NA	A	W	A	A	W	W	A	W	A	A	W	W	W	A	A	A	NA	W	A	W	W	W	W	W	W	A	A	W	A	A	A	W	A	A	W	A	A	A	W	W	W	A	W	A
ChrIV	26.1	W	W	W	A	A	W	A	A	W	W	A	W	A	A	W	W	W	A	A	A	NA	W	NA	W	W	W	W	W	W	A	A	W	A	A	A	W	A	A	W	A	A	A	W	W	W	A	W	A
ChrIV	26.2	W	W	W	A	A	W	A	A	W	W	A	W	A	A	W	W	W	A	A	A	W	W	A	W	W	W	W	W	W	A	A	W	A	A	A	W	A	A	W	A	A	A	W	W	W	A	W	A
ChrIV	26.3	W	W	W	A	A	W	A	A	W	W	A	W	A	NA	W	W	W	A	A	A	W	W	A	W	W	W	W	W	W	A	A	W	A	A	A	W	A	A	W	A	A	A	W	W	W	A	W	A
ChrIV	26.4	W	W	W	A	A	W	A	A	W	W	A	W	A	A	W	W	W	A	A	A	W	W	A	W	W	W	W	W	W	A	A	W	A	A	A	NA	A	A	W	A	A	A	W	W	W	A	W	A
ChrIV	26.5	W	W	W	A	A	W	A	A	W	W	A	W	A	A	W	W	W	A	A	A	W	W	A	W	W	W	W	W	W	A	A	W	A	A	W	W	A	A	W	A	W	A	W	W	W	A	W	A
ChrIV	26.6	W	W	W	A	A	W	A	A	W	W	A	W	A	A	W	W	W	A	A	A	W	W	A	W	W	W	W	W	W	A	A	W	A	A	W	W	A	A	W	A	W	A	W	W	W	A	W	A
ChrIV	26.7	W	W	W	A	A	W	A	A	W	W	A	W	A	A	W	W	W	A	A	A	W	W	A	W	W	W	W	W	W	A	A	W	A	A	W	W	A	A	W	A	W	A	W	W	W	A	W	A
ChrIV	26.8	W	W	W	A	A	W	A	A	W	W	A	W	A	A	W	W	W	A	A	A	W	W	A	W	W	W	W	W	W	A	A	W	A	A	W	W	A	A	W	A	W	A	W	W	W	A	W	A
ChrIV	26.9	W	W	W	A	A	W	A	A	W	W	A	W	A	A	W	W	W	A	A	A	W	W	A	W	W	W	W	W	W	A	A	W	A	A	W	W	A	A	W	A	W	A	W	W	W	A	W	A
ChrIV	27	W	W	W	A	A	W	A	A	W	W	A	NA	A	A	W	W	W	A	A	A	W	W	A	W	W	W	W	W	W	A	A	W	A	A	W	W	A	A	W	A	W	A	W	W	W	A	W	NA
ChrIV	27.1	W	W	W	A	A	W	A	A	W	W	A	W	A	A	W	W	W	A	A	A	W	W	A	W	W	W	W	W	W	A	A	W	A	A	W	NA	A	A	W	A	W	A	W	W	W	A	W	W
ChrIV	27.2	W	W	W	A	A	NA	A	A	W	W	NA	W	A	A	NA	W	W	A	A	A	W	W	A	W	W	W	NA	W	W	A	A	W	A	A	W	W	A	A	W	NA	W	A	W	W	W	NA	W	W
ChrIV	27.3	W	W	W	NA	A	W	A	A	W	W	A	W	A	A	W	W	W	A	A	A	W	W	A	W	W	W	W	W	W	A	A	W	NA	A	W	W	NA	A	W	A	W	NA	W	W	W	NA	W	W
ChrIV	27.4	W	W	W	NA	A	W	A	A	W	W	NA	W	A	A	W	W	W	A	NA	NA	W	W	A	W	W	W	W	W	W	A	W	W	A	A	W	W	NA	A	W	A	W	NA	W	W	W	A	W	W
ChrIV	27.5	W	W	W	A	A	W	NA	A	W	W	A	W	A	A	W	W	W	A	A	A	W	W	A	W	W	W	W	W	W	A	W	W	A	A	W	W	A	A	W	A	W	A	W	W	W	A	W	W
ChrIV	27.6	W	W	W	A	A	W	A	A	W	W	A	W	A	NA	W	W	W	A	A	A	W	W	A	W	W	W	W	W	W	A	W	W	A	NA	W	W	A	A	W	A	W	A	W	W	W	A	W	W
ChrIV	27.7	W	W	W	A	A	W	NA	A	W	W	A	W	A	A	W	W	W	A	A	A	W	W	A	W	W	W	W	W	W	A	W	W	A	A	W	W	A	A	W	A	W	A	W	W	W	A	W	W
ChrIV	27.8	W	W	W	A	A	W	A	A	W	W	A	W	A	A	W	W	W	A	A	A	W	W	A	W	W	W	W	W	W	A	W	W	A	A	W	W	A	A	W	A	W	A	W	W	W	A	W	W
ChrIV	27.9	W	W	W	A	W	W	A	A	W	W	A	W	A	A	W	W	W	A	A	A	W	W	A	W	W	W	W	W	W	A	W	W	A	A	W	W	A	A	W	A	W	A	W	W	W	A	W	W
ChrIV	28	W	W	W	A	W	W	A	A	W	W	A	W	A	A	W	W	W	A	A	A	W	W	A	W	W	W	W	W	W	A	W	W	A	A	W	W	A	A	W	A	W	A	W	W	W	A	W	W
ChrIV	28.1	W	W	W	A	W	W	A	A	W	W	A	NA	A	A	W	W	W	A	A	A	W	W	A	W	W	W	W	W	W	A	W	W	A	A	W	W	A	A	W	A	W	A	W	W	W	A	W	W
ChrIV	28.2	W	W	W	A	W	W	A	A	W	W	A	W	A	A	W	W	W	A	NA	A	W	W	A	W	W	W	W	W	W	A	W	W	A	A	W	W	A	A	W	A	W	A	W	W	W	NA	W	W
ChrIV	28.3	W	W	W	A	W	W	A	A	W	W	A	W	A	A	W	W	W	A	A	A	W	W	A	W	W	W	W	W	W	A	W	W	A	A	W	W	A	A	W	A	W	A	W	W	W	A	W	W
ChrIV	28.4	W	W	W	A	W	W	A	A	W	W	A	W	A	A	W	W	W	A	A	A	W	W	A	W	W	W	W	W	W	A	W	W	A	A	W	W	A	A	W	A	W	A	W	W	W	A	W	W
ChrIV	28.5	W	W	W	A	W	W	A	A	W	W	A	W	A	A	W	W	W	A	A	A	W	W	A	W	W	W	W	W	W	A	W	W	NA	A	W	W	A	A	W	NA	W	A	W	W	W	A	W	W
ChrIV	28.6	W	W	W	A	W	W	A	A	W	W	A	W	A	A	W	W	W	A	A	A	W	W	A	W	W	W	W	W	W	A	W	W	W	A	W	W	A	A	W	W	W	A	W	W	W	A	W	W
ChrIV	28.7	W	W	W	A	W	W	A	A	W	W	A	W	A	A	W	W	W	A	A	A	W	W	A	W	W	W	W	W	W	A	W	W	W	A	W	W	A	A	W	W	W	A	W	W	W	A	W	W
ChrIV	28.8	W	W	W	A	W	W	A	A	W	W	A	W	A	A	W	W	W	A	A	A	W	W	A	W	W	W	W	W	W	A	W	W	W	A	W	W	A	A	W	W	W	A	W	W	W	A	W	W
ChrIV	28.9	W	W	W	A	W	W	A	A	W	W	A	W	A	A	W	W	W	A	A	A	W	W	A	W	W	W	W	W	W	A	W	W	W	A	W	W	A	A	W	W	W	A	W	W	W	A	W	W
ChrIV	29	W	W	W	A	W	W	A	A	W	W	A	W	A	A	W	W	W	A	A	A	W	W	A	W	W	W	W	W	W	A	W	W	W	A	W	W	A	A	W	W	W	A	W	W	W	A	W	W
ChrIV	29.1	W	W	W	NA	W	W	A	A	W	W	A	W	A	A	W	W	W	A	A	NA	W	W	NA	W	W	W	W	W	W	A	W	W	W	A	W	W	A	A	W	W	W	A	W	W	W	A	W	W
ChrIV	29.2	W	W	W	NA	W	W	A	A	W	W	A	W	A	W	W	W	W	A	A	A	W	W	A	W	W	W	W	W	W	A	W	W	W	A	W	W	A	A	W	W	W	A	W	W	W	A	W	W
ChrIV	29.3	W	W	W	W	W	W	A	A	W	W	A	W	A	W	W	W	W	A	A	A	W	W	A	W	W	W	W	W	W	A	W	W	W	A	W	W	A	A	W	W	W	A	W	W	W	A	W	W
ChrIV	29.5	W	W	W	W	W	W	A	A	W	W	A	W	A	W	W	W	W	A	A	A	W	W	NA	W	W	W	W	W	W	A	W	W	W	A	W	W	A	A	W	W	W	A	W	W	W	A	W	W
ChrIV	29.6	W	W	W	W	W	W	NA	A	W	W	A	W	A	W	W	W	W	A	A	A	W	W	A	W	W	W	W	W	W	A	W	W	W	A	W	W	A	A	W	W	W	A	W	W	W	A	W	W
ChrIV	29.7	W	W	W	W	W	W	A	A	W	W	A	W	A	W	W	W	W	A	A	A	W	W	A	W	W	W	W	W	W	A	W	W	NA	A	W	W	A	A	W	W	W	A	W	W	W	A	W	W
ChrIV	29.8	W	W	W	W	W	W	A	A	W	W	A	W	A	W	W	W	W	A	A	A	W	W	NA	W	W	W	W	W	W	A	W	W	W	A	W	W	A	A	W	W	W	A	W	W	W	A	W	W
ChrIV	29.9	W	W	W	W	W	W	A	A	W	W	A	W	A	W	W	W	W	A	A	A	W	W	A	W	W	W	W	W	W	A	W	W	W	A	W	W	A	A	W	W	W	A	W	W	W	A	W	W
ChrIV	30	W	W	W	W	W	W	A	A	W	W	A	W	A	W	W	W	W	A	A	A	W	W	A	W	W	W	W	W	W	A	W	W	W	A	W	W	A	A	W	W	W	A	W	W	W	A	W	W
ChrIV	30.1	W	W	W	W	W	W	A	A	W	W	A	W	A	W	W	W	W	A	A	A	W	W	A	W	W	W	W	W	W	A	W	W	W	A	W	W	A	A	W	W	W	A	W	W	W	A	W	W
ChrIV	30.2	W	W	W	W	W	W	NA	A	W	W	A	W	A	W	W	W	W	A	A	A	W	W	NA	W	W	W	W	W	W	A	W	W	W	A	W	W	A	A	W	W	W	A	W	W	W	A	W	W
ChrIV	30.3	W	W	W	W	W	W	A	A	W	W	A	W	A	W	W	W	W	A	A	A	W	W	A	W	W	W	W	W	W	A	W	W	W	A	W	W	A	A	W	W	W	A	W	W	W	A	W	W
ChrIV	30.4	W	W	W	W	W	W	NA	A	W	W	A	W	A	W	W	W	W	A	A	NA	W	W	A	W	W	W	W	W	W	A	W	W	W	NA	W	W	A	A	W	W	W	A	W	W	W	A	W	W
ChrV	0	W	A	A	W	A	W	A	W	A	A	A	W	A	A	A	A	W	A	A	A	A	A	A	W	W	A	A	A	W	A	A	A	W	W	A	A	A	W	A	W	W	W	A	W	W	A	W	A
ChrV	0.1	W	A	A	W	A	W	A	W	A	A	A	W	A	A	NA	A	W	A	A	A	A	A	A	W	W	A	A	A	W	A	A	A	W	W	A	A	A	W	A	W	W	W	A	W	W	A	W	A
ChrV	0.2	W	A	A	W	A	W	A	W	A	A	A	W	A	A	NA	A	W	A	NA	A	A	A	A	W	W	A	A	A	W	A	A	A	W	W	A	A	A	W	A	W	W	W	A	W	W	A	W	A
ChrV	0.3	W	A	A	W	A	W	A	W	A	A	A	W	A	A	A	A	W	A	A	A	A	A	A	W	W	A	A	A	W	A	A	A	W	W	A	A	A	W	A	W	W	W	A	W	W	A	W	A
ChrV	0.4	W	A	A	W	A	W	A	W	A	A	A	W	A	NA	A	A	W	A	A	A	A	A	A	W	W	A	A	A	W	A	A	A	W	W	A	A	A	W	A	W	W	W	A	W	W	A	W	A
ChrV	0.5	W	A	A	W	A	W	A	W	A	A	A	W	A	A	A	A	W	A	A	A	A	A	A	W	W	A	A	A	W	A	A	A	W	W	A	A	A	W	A	W	W	W	A	W	W	A	W	A
ChrV	0.7	W	A	A	W	A	W	A	W	A	A	A	W	A	A	A	A	W	A	A	A	A	A	A	W	W	W	A	A	W	A	A	A	W	W	A	A	A	W	A	W	W	W	A	W	W	A	W	A
ChrV	0.8	W	A	A	W	A	W	A	W	A	A	A	W	A	A	A	A	W	A	A	A	A	A	A	W	W	W	A	A	W	A	A	A	W	W	A	A	A	W	A	W	W	W	A	W	W	A	W	A
ChrV	1	W	A	NA	NA	NA	NA	A	NA	NA	A	NA	NA	A	NA	A	NA	W	A	A	A	A	A	A	W	W	W	A	A	W	A	NA	NA	W	W	A	A	A	W	A	W	W	W	A	W	NA	A	NA	A
ChrV	1.1	W	A	A	W	NA	W	A	W	A	A	A	NA	A	NA	A	A	W	A	A	NA	A	A	A	W	W	W	NA	A	W	A	A	A	W	W	A	A	A	W	A	NA	W	W	A	W	NA	A	W	A
ChrV	1.2	W	A	A	W	A	W	A	W	A	A	A	W	A	A	A	A	W	A	A	NA	A	A	A	W	W	W	A	A	W	A	A	A	W	W	A	NA	A	W	A	W	W	W	A	W	W	A	W	A
ChrV	1.3	W	A	A	NA	A	NA	A	NA	A	A	A	NA	A	A	A	A	W	A	A	A	A	A	A	W	W	W	A	A	W	A	A	A	W	W	A	A	A	W	A	W	W	NA	A	W	NA	A	NA	A
ChrV	1.4	W	A	A	W	A	W	A	W	A	A	A	NA	A	A	A	A	W	A	A	A	A	A	A	W	W	W	A	A	W	A	A	A	W	W	A	A	A	W	A	W	W	W	A	W	W	A	W	A
ChrV	1.5	W	A	A	W	A	W	A	W	A	A	A	W	A	A	NA	A	W	A	A	A	A	A	NA	W	W	W	A	A	W	A	A	A	W	W	A	A	A	W	A	NA	W	W	NA	W	W	A	W	A
ChrV	1.6	W	A	A	NA	A	W	A	W	A	A	A	W	A	A	W	A	W	A	A	A	A	A	A	W	W	W	NA	A	W	A	A	A	W	W	A	A	A	W	A	A	W	W	W	W	W	A	W	A
ChrV	1.7	W	NA	A	W	A	NA	A	W	NA	NA	A	NA	A	A	W	A	W	NA	A	A	A	A	A	W	W	NA	A	A	W	A	A	NA	W	W	A	A	A	W	A	A	W	W	NA	W	NA	A	NA	A
ChrV	1.8	W	A	A	W	A	W	A	W	A	A	A	W	A	A	W	A	W	A	A	A	A	A	A	W	W	W	A	A	W	A	A	A	NA	W	A	A	A	W	A	A	W	W	W	W	W	A	W	A
ChrV	2	W	A	A	W	A	W	A	W	A	A	A	W	A	A	W	A	W	A	A	A	A	A	A	W	W	W	A	A	NA	A	A	A	W	W	A	A	A	W	A	A	W	W	W	W	W	A	W	A
ChrV	2.1	W	A	A	W	A	W	A	W	A	A	A	W	A	A	W	A	W	A	A	A	NA	A	A	W	W	W	A	A	W	A	A	A	W	W	A	A	A	W	A	A	W	W	W	W	W	A	W	A
ChrV	2.2	W	A	A	W	A	NA	A	NA	A	A	A	W	A	A	W	A	W	A	A	A	A	A	A	W	W	NA	A	A	W	A	A	A	W	W	A	A	A	W	A	A	W	W	W	W	W	A	W	A
ChrV	2.3	W	A	A	W	A	W	A	W	A	A	A	W	A	A	W	A	W	A	A	A	A	A	A	W	W	W	A	A	W	A	A	A	W	W	A	A	A	W	A	A	W	W	W	W	NA	A	W	A
ChrV	2.4	W	A	A	W	A	W	A	W	A	A	A	W	A	A	W	A	W	A	A	A	NA	A	A	W	W	W	A	NA	W	A	A	A	W	W	A	A	A	W	A	A	W	W	W	W	W	NA	W	A
ChrV	2.6	W	A	A	W	A	W	A	W	A	A	A	W	A	A	W	A	W	A	A	A	A	A	A	W	W	W	A	A	W	A	A	A	W	W	A	A	A	W	A	A	W	W	W	W	W	A	W	A
ChrV	2.7	W	A	A	W	A	NA	A	W	A	A	A	A	A	A	W	A	W	A	A	A	A	A	A	W	W	W	A	A	W	W	A	A	W	W	A	A	A	W	A	A	W	W	NA	W	W	A	W	A
ChrV	2.8	W	A	A	W	A	W	A	W	A	A	A	A	A	A	W	A	W	A	A	A	A	A	NA	W	W	W	A	NA	W	W	A	A	W	W	A	A	A	W	A	A	W	W	W	W	W	A	W	A
ChrV	2.9	W	A	A	W	A	W	A	W	A	A	A	A	A	A	W	A	W	A	A	A	A	A	A	W	W	W	A	A	W	W	A	A	W	W	A	A	A	W	A	A	W	W	NA	W	NA	A	W	A
ChrV	3	W	A	A	NA	A	W	A	NA	A	A	A	A	A	A	W	NA	W	A	A	A	A	A	A	W	W	W	A	A	NA	W	A	A	W	NA	A	A	A	W	A	A	W	NA	NA	W	W	A	NA	A
ChrV	3.1	W	A	A	NA	A	W	A	NA	A	A	A	A	A	A	W	A	W	A	A	NA	A	A	A	W	W	W	A	W	W	W	A	A	NA	NA	NA	A	A	W	A	A	W	NA	NA	NA	NA	A	NA	A
ChrV	3.2	W	A	A	W	A	W	A	W	A	A	A	A	A	A	W	A	W	A	A	A	A	A	A	W	W	W	A	W	W	W	A	A	W	W	A	A	A	W	A	A	W	W	W	W	W	A	W	A
ChrV	3.3	W	A	A	W	A	W	A	NA	A	A	A	A	A	A	W	A	W	A	A	A	A	A	A	W	W	W	A	W	W	W	A	A	W	W	A	A	A	W	A	A	W	W	W	W	NA	A	W	A
ChrV	3.6	W	A	NA	W	A	W	A	W	NA	A	A	NA	NA	NA	W	A	W	A	A	A	A	A	A	W	W	W	A	W	NA	W	A	A	W	W	A	A	A	W	A	A	W	NA	W	W	NA	A	NA	A
ChrV	3.7	NA	A	A	W	A	W	NA	W	A	A	A	A	A	NA	NA	A	W	A	A	A	A	A	A	W	W	W	A	W	W	W	A	A	W	W	A	A	A	W	A	A	W	NA	NA	W	NA	A	W	A
ChrV	3.8	W	A	A	W	A	W	A	W	A	A	A	A	A	A	W	A	W	A	A	A	A	A	A	W	W	W	A	W	NA	W	A	A	W	W	A	A	A	NA	A	A	W	W	W	W	W	A	W	A
ChrV	3.9	W	A	A	W	A	W	A	W	A	A	A	A	A	A	W	A	W	A	A	NA	A	A	A	W	W	W	A	W	W	W	A	A	W	W	A	A	A	A	A	A	W	W	W	W	W	A	W	A
ChrV	4	W	A	A	W	A	W	A	NA	A	A	A	A	A	A	W	A	W	A	A	A	A	A	A	W	W	NA	A	W	W	W	A	A	W	W	A	A	A	A	A	A	W	W	W	W	W	A	W	A
ChrV	4.1	W	A	A	W	A	W	A	W	A	A	A	A	A	A	W	A	W	A	A	A	A	A	A	W	NA	W	A	W	W	W	A	A	W	W	A	A	A	A	A	A	W	W	W	W	NA	A	W	A
ChrV	4.2	W	A	A	W	A	W	A	NA	A	A	A	A	A	A	W	A	W	A	A	NA	A	A	A	W	W	NA	A	W	W	W	A	A	W	W	A	A	A	A	A	A	W	W	W	W	W	A	W	A
ChrV	4.3	W	A	A	W	A	W	NA	W	A	A	A	A	A	A	W	A	W	A	A	A	A	A	A	W	W	W	A	W	W	W	A	A	W	NA	A	A	A	A	A	A	W	NA	W	W	W	A	W	A
ChrV	4.4	W	A	A	NA	A	W	A	W	A	A	A	A	A	A	W	A	W	A	A	NA	A	A	A	W	W	W	A	W	W	W	A	A	W	W	A	A	A	A	A	A	W	W	W	W	W	A	W	A
ChrV	4.5	W	A	A	W	A	W	A	W	A	A	A	A	A	A	W	A	W	A	A	NA	A	A	A	W	W	W	A	W	W	W	A	A	NA	W	A	A	A	A	A	A	W	W	W	W	W	A	W	A
ChrV	4.6	W	NA	A	W	A	W	A	W	A	A	A	NA	A	NA	W	NA	W	A	A	W	A	NA	A	W	W	W	NA	W	W	W	A	A	W	W	A	A	A	A	A	A	W	W	W	A	W	A	W	A
ChrV	4.8	W	A	A	NA	A	W	A	NA	A	A	A	A	A	A	NA	A	W	A	W	W	A	A	A	W	W	W	A	W	NA	W	A	A	W	W	A	A	A	A	A	A	W	W	W	A	W	A	W	A
ChrV	4.9	NA	A	A	NA	A	W	A	NA	A	A	A	A	A	A	NA	A	W	A	W	W	A	A	A	W	W	W	A	W	W	W	A	A	W	NA	A	A	A	A	NA	A	W	W	W	A	W	NA	NA	A
ChrV	5	W	A	A	W	A	W	A	W	A	A	A	A	A	A	W	A	W	A	W	W	NA	A	A	W	W	W	NA	W	W	W	A	NA	W	W	A	NA	A	NA	A	A	W	W	W	A	W	NA	W	NA
ChrV	5.2	W	A	A	W	A	W	A	W	A	A	A	NA	NA	A	W	NA	W	A	W	W	NA	A	NA	W	W	W	A	W	W	W	NA	A	W	W	NA	A	A	NA	NA	A	W	W	W	A	W	NA	W	A
ChrV	5.3	W	A	A	W	A	W	A	NA	A	A	A	A	A	A	W	A	W	A	W	W	A	A	A	W	W	W	A	W	W	W	A	A	W	W	A	A	A	A	A	A	W	W	W	A	W	A	W	A
ChrV	5.4	W	A	A	NA	A	W	NA	W	A	A	A	NA	NA	A	W	NA	W	A	W	NA	A	NA	A	W	W	W	A	W	NA	W	A	A	NA	W	A	A	A	A	A	A	W	W	NA	A	W	A	NA	A
ChrV	5.5	W	A	A	W	A	W	NA	W	A	A	A	A	A	NA	W	A	W	A	W	W	A	A	A	W	W	W	A	W	W	W	A	A	W	W	A	A	A	A	A	A	W	W	W	A	W	A	W	A
ChrV	5.6	W	A	A	W	A	W	A	W	A	A	A	A	A	A	NA	A	W	A	W	W	A	A	A	W	W	W	A	W	W	W	A	A	W	W	A	A	A	A	A	A	W	W	W	A	W	A	W	A
ChrV	5.7	W	A	A	NA	A	W	A	W	A	A	A	A	A	A	NA	A	W	A	W	NA	A	A	A	W	W	W	A	W	W	W	A	A	W	W	A	A	A	A	A	A	W	W	W	A	W	A	W	A
ChrV	5.8	W	A	A	W	A	W	A	W	A	A	A	A	A	A	NA	A	W	A	W	W	A	A	A	W	W	W	A	W	W	W	A	A	W	W	A	A	A	A	A	A	W	W	W	A	W	A	W	A
ChrV	5.9	W	A	A	W	A	W	A	W	A	A	A	A	A	A	NA	A	W	A	W	W	A	A	A	W	W	W	A	W	W	W	A	A	W	W	A	A	A	A	A	A	W	W	W	A	W	A	W	A
ChrV	6	W	A	A	W	A	W	A	W	A	A	A	A	A	A	W	A	W	A	W	W	A	A	A	W	W	W	A	W	W	W	A	A	W	W	A	A	A	A	A	A	W	W	W	A	W	A	W	A
ChrV	6.1	W	A	A	W	A	W	A	W	A	A	A	A	A	A	W	A	W	A	W	W	A	A	A	W	W	W	A	W	W	W	A	A	W	W	A	A	A	A	A	A	W	W	W	A	W	A	W	A
ChrV	6.2	W	A	A	W	A	W	A	W	A	A	A	A	A	A	W	A	W	A	W	W	A	A	A	W	W	W	A	W	W	W	A	A	W	W	A	A	A	A	A	A	W	W	W	A	W	A	W	A
ChrV	6.3	W	A	A	W	A	W	A	W	A	A	A	A	A	A	W	A	W	A	W	W	A	A	A	W	W	W	A	W	W	W	A	A	W	W	A	A	A	A	A	A	W	W	W	A	W	A	W	A
ChrV	6.4	W	A	A	W	A	W	A	W	A	A	A	A	A	A	NA	A	W	A	W	W	A	A	A	W	W	W	A	W	W	W	A	A	W	W	A	A	A	A	A	A	W	W	W	A	W	A	W	A
ChrV	6.5	W	A	A	W	A	W	A	W	A	A	A	A	A	A	W	A	W	A	W	W	A	A	NA	W	W	W	A	W	W	W	A	A	W	W	A	A	A	A	A	A	W	W	W	A	W	A	W	A
ChrV	6.6	W	A	A	W	A	W	A	W	A	A	A	A	A	A	NA	A	W	A	W	W	A	A	A	W	W	W	A	W	W	W	A	A	W	W	A	A	A	A	A	A	W	W	W	A	W	A	W	A
ChrV	6.7	W	A	A	W	A	W	A	W	A	A	A	A	A	A	W	A	W	A	W	W	A	A	A	W	W	W	A	W	W	W	A	A	W	W	A	A	A	A	A	A	W	W	W	A	W	A	W	A
ChrV	6.8	W	A	A	W	A	W	A	W	A	A	A	A	A	A	W	A	W	A	W	W	A	A	A	W	W	W	A	W	W	W	A	A	W	W	A	A	A	A	A	A	W	W	W	A	W	A	W	A
ChrV	6.9	W	A	A	W	A	W	A	W	A	A	A	A	A	A	W	A	W	A	W	W	NA	A	A	W	W	W	A	W	W	W	A	A	W	W	A	A	A	A	A	A	W	W	W	A	W	NA	W	A
ChrV	7	W	A	A	W	A	W	A	W	A	A	A	A	A	A	NA	A	W	A	W	W	A	A	A	W	W	W	A	W	W	W	A	A	W	W	A	A	A	A	A	A	W	W	W	A	W	A	W	A
ChrV	7.1	W	A	A	W	A	W	A	W	A	A	A	A	A	A	W	A	W	A	W	W	A	A	A	W	W	W	NA	W	W	W	A	A	W	W	A	A	A	A	A	A	W	W	W	A	W	A	W	A
ChrV	7.2	W	A	A	W	A	W	A	W	A	A	A	A	A	A	W	A	W	A	W	W	A	A	A	W	W	W	A	W	W	W	A	A	W	W	A	A	A	A	A	A	W	W	W	A	W	A	W	A
ChrV	7.3	W	A	A	W	A	W	A	NA	A	A	A	A	A	NA	NA	A	W	A	W	NA	A	A	A	W	W	NA	A	W	W	W	A	A	W	W	A	A	A	A	A	A	W	W	W	A	W	A	W	A
ChrV	7.5	W	A	A	W	A	W	A	W	A	A	A	A	A	A	W	A	W	A	W	W	NA	A	A	W	W	W	A	W	W	W	A	A	W	W	A	A	A	A	A	A	W	W	W	A	W	A	W	A
ChrV	7.6	W	A	A	W	A	W	A	W	A	A	A	A	A	A	NA	A	W	A	W	W	A	A	A	W	W	W	A	W	W	W	A	A	W	W	A	A	A	A	A	A	W	W	W	A	W	A	W	A
ChrV	7.8	W	A	A	W	A	W	A	W	A	NA	A	A	A	A	W	A	W	NA	W	W	A	A	NA	W	W	W	NA	W	W	W	A	A	W	W	A	A	A	A	A	A	W	W	W	A	W	A	W	NA
ChrV	7.9	W	A	A	W	A	W	A	NA	A	A	A	A	A	A	W	A	W	A	W	W	A	A	A	W	W	W	A	W	W	W	A	A	W	W	A	A	A	A	A	A	W	W	W	A	W	A	W	A
ChrV	8	W	A	A	W	A	W	A	W	A	A	A	A	A	A	W	A	W	A	W	W	A	A	A	W	W	NA	A	W	W	W	A	A	W	W	A	A	A	A	A	A	W	W	W	A	W	A	W	A
ChrV	8.1	W	A	A	W	A	W	A	W	A	A	A	A	A	A	W	A	W	A	W	W	A	A	A	W	W	W	NA	W	W	W	A	A	W	W	A	A	A	A	A	A	W	W	W	A	W	A	W	A
ChrV	8.2	W	A	A	NA	A	W	A	NA	A	A	A	A	A	A	NA	A	W	A	W	NA	A	A	A	W	W	W	A	W	W	W	A	A	W	W	A	A	A	A	A	A	W	W	W	A	W	A	W	A
ChrV	8.3	W	A	A	W	A	W	A	W	A	A	A	A	A	A	W	A	W	A	W	W	A	A	A	W	W	NA	A	W	W	W	A	A	W	W	A	A	A	A	A	A	W	W	W	A	W	A	W	A
ChrV	8.4	NA	A	A	W	A	W	A	W	A	A	A	A	A	A	W	A	W	A	W	NA	A	A	A	W	W	W	NA	W	W	W	A	A	W	W	A	A	A	A	A	A	W	W	NA	A	W	A	W	A
ChrV	8.8	W	A	A	W	A	W	A	W	A	A	A	A	A	A	W	A	W	A	W	W	NA	A	A	W	W	W	A	W	W	W	A	A	W	W	A	A	A	A	A	A	W	W	W	A	W	NA	W	NA
ChrV	9	W	A	A	W	A	W	A	W	A	A	A	A	A	A	NA	A	W	A	W	W	A	A	A	W	W	W	A	W	W	W	A	A	W	W	A	A	A	A	A	A	W	W	W	A	W	A	W	A
ChrV	9.1	W	A	A	W	A	W	A	W	A	A	A	A	A	A	W	A	W	A	W	W	A	A	A	W	W	W	A	W	W	W	A	A	W	W	A	A	A	A	A	A	W	W	W	A	W	A	W	A
ChrV	9.2	W	A	A	W	A	W	A	W	A	A	A	A	A	A	W	A	W	A	W	W	A	A	A	W	W	W	A	W	W	W	A	A	W	W	A	A	A	A	A	A	W	W	W	A	W	A	W	A
ChrV	9.3	W	A	A	W	A	W	A	W	A	A	A	A	A	A	NA	A	W	A	W	W	A	A	A	W	W	W	A	W	W	W	A	A	W	W	A	A	A	A	A	A	W	W	W	A	W	A	W	A
ChrV	9.4	NA	A	A	NA	A	W	A	W	A	A	A	A	A	A	NA	A	W	A	W	W	NA	A	A	W	NA	NA	A	W	NA	W	A	A	W	W	A	A	A	A	NA	A	NA	W	W	A	W	A	W	A
ChrV	9.6	W	A	A	W	A	W	A	W	A	A	A	A	A	A	NA	A	W	NA	W	W	A	A	NA	W	W	W	A	W	W	W	A	A	W	W	A	A	A	A	A	A	W	W	W	A	W	A	W	NA
ChrV	9.7	W	A	A	W	A	W	A	NA	A	A	A	A	A	A	W	A	W	A	W	W	A	A	A	W	W	W	A	W	W	W	A	A	W	W	A	A	A	A	A	A	W	W	W	A	W	A	W	A
ChrV	9.8	W	A	A	W	A	W	A	W	A	A	A	A	A	A	NA	A	W	A	W	W	NA	A	A	W	W	W	A	W	W	W	A	A	W	W	A	A	A	A	A	A	W	W	W	A	W	A	W	A
ChrV	9.9	W	A	A	W	A	W	A	W	A	A	A	A	A	A	W	A	W	A	W	W	A	A	A	W	W	W	A	W	W	W	A	A	W	W	A	A	A	A	A	A	W	W	W	A	W	A	W	A
ChrV	10.4	W	A	A	NA	A	W	A	W	A	A	A	A	A	A	NA	A	W	A	W	W	A	A	A	W	W	W	A	W	W	W	A	A	W	W	A	A	A	A	A	A	W	W	W	A	NA	A	W	A
ChrV	10.5	W	A	A	W	A	W	A	W	A	A	A	A	A	A	W	A	W	A	W	W	A	A	A	W	W	W	A	W	W	W	A	A	W	W	A	A	A	A	A	A	W	W	W	A	W	A	W	A
ChrV	10.6	W	A	A	NA	A	W	A	W	A	A	A	A	A	A	NA	A	W	A	W	NA	A	A	A	W	W	W	A	W	NA	W	A	A	W	W	A	A	A	A	A	A	W	NA	W	A	NA	A	W	A
ChrV	10.7	W	A	A	W	A	W	A	W	A	A	A	A	A	A	W	A	W	A	W	W	A	A	A	W	W	W	A	W	W	W	A	A	W	W	A	A	A	A	A	A	W	W	W	A	W	A	W	A
ChrV	10.8	W	A	A	W	A	W	A	W	A	A	A	A	A	A	W	A	W	A	W	NA	A	A	A	W	W	W	A	W	W	W	A	A	W	W	A	A	A	A	A	A	W	W	W	A	W	A	W	A
ChrV	10.9	W	A	A	W	A	W	A	W	A	A	A	A	A	A	NA	A	W	A	W	W	A	A	A	W	W	W	A	W	W	W	A	A	W	W	A	A	A	A	A	A	W	W	W	A	W	A	W	A
ChrV	11	W	A	A	W	A	W	NA	W	A	A	A	A	A	A	W	A	W	A	W	W	A	A	A	W	W	W	A	W	W	W	A	A	W	W	A	A	A	A	A	A	W	W	W	A	W	A	W	A
ChrV	11.1	W	A	A	W	A	W	A	W	A	A	A	A	A	A	W	A	W	A	W	W	A	A	A	W	W	W	A	W	W	W	A	A	W	W	A	A	A	A	A	A	W	W	W	A	W	A	W	A
ChrV	11.2	W	A	A	W	A	W	A	W	A	A	A	A	A	A	W	A	W	A	W	W	A	A	A	W	W	W	NA	W	NA	W	A	A	W	W	A	A	A	A	A	A	W	W	W	A	W	A	W	A
ChrV	11.3	W	A	A	W	A	W	A	NA	A	A	A	A	A	A	W	A	W	A	W	NA	A	A	A	W	W	W	A	W	W	W	A	A	W	W	A	A	A	A	A	A	W	W	W	A	W	A	W	A
ChrV	11.4	W	A	A	W	A	W	A	NA	A	A	A	A	A	A	NA	A	W	A	W	W	A	A	A	W	W	W	A	W	W	W	A	A	W	W	A	A	A	A	A	A	W	W	W	A	W	A	W	A
ChrV	11.5	W	A	A	W	A	W	NA	W	A	A	A	A	A	A	W	NA	W	A	W	W	A	A	A	W	W	W	A	W	W	W	A	A	W	W	A	A	A	A	A	A	W	W	W	A	W	A	W	A
ChrV	11.6	W	A	A	W	A	W	A	W	A	A	A	A	A	A	NA	A	W	A	W	W	NA	A	A	W	W	W	A	W	W	W	A	A	W	W	A	A	A	A	A	A	W	W	W	A	W	NA	W	A
ChrV	11.7	W	A	A	W	A	W	A	W	A	A	A	A	A	A	NA	A	W	A	W	W	A	A	A	W	W	W	A	W	W	W	A	A	W	W	A	A	A	A	A	A	W	W	W	A	W	A	W	A
ChrV	11.8	NA	A	A	W	A	W	A	W	A	A	A	A	A	A	NA	A	W	A	W	W	A	A	A	W	W	W	A	W	W	W	A	A	W	W	A	A	A	A	A	A	W	NA	W	A	NA	A	W	A
ChrV	11.9	NA	A	A	W	A	W	A	NA	A	A	A	NA	A	NA	NA	A	W	A	W	NA	A	A	A	W	W	W	A	W	W	W	A	A	W	W	A	A	A	A	A	A	W	W	W	A	NA	A	W	A
ChrV	12	W	A	A	W	A	W	A	W	A	A	A	A	A	A	NA	A	W	A	W	NA	A	A	A	W	W	W	A	W	W	W	A	A	W	W	A	A	A	A	A	A	W	W	W	A	W	A	W	A
ChrV	12.1	W	A	A	W	A	W	A	NA	A	A	A	A	A	A	W	A	W	A	W	W	A	A	A	W	W	W	A	W	W	W	A	A	W	W	A	A	A	A	A	A	W	W	W	A	W	A	W	A
ChrV	12.2	W	A	A	W	A	W	A	W	A	A	A	A	A	A	NA	A	W	A	W	W	A	A	A	W	W	W	NA	W	W	W	A	A	W	W	A	A	A	A	A	A	W	W	W	A	W	A	W	A
ChrV	12.3	W	A	A	W	A	W	A	W	A	A	A	A	A	A	W	A	W	A	W	W	A	A	A	W	W	W	A	W	W	W	A	A	W	W	A	A	A	A	A	A	W	W	W	A	W	A	W	A
ChrV	12.4	W	A	A	W	A	W	A	NA	A	A	A	A	A	A	W	A	W	A	W	W	A	A	A	W	W	NA	A	W	W	W	A	A	W	W	A	A	A	A	A	A	W	W	W	A	W	A	W	A
ChrV	12.6	W	A	A	W	A	W	A	W	A	A	A	A	A	A	W	A	W	A	W	W	A	A	A	W	W	W	A	W	W	W	A	A	W	W	A	A	NA	A	NA	A	W	W	W	NA	W	NA	W	NA
ChrV	12.7	W	A	A	W	A	W	A	W	A	A	A	A	A	A	W	A	W	A	W	W	NA	A	NA	W	W	W	NA	W	W	W	A	A	W	W	A	A	A	A	NA	A	W	W	W	A	W	A	W	NA
ChrV	12.8	W	A	A	W	A	W	NA	W	A	A	A	A	A	A	W	A	W	A	W	W	NA	A	NA	W	W	W	NA	W	W	W	A	A	W	W	A	A	A	A	A	A	W	W	W	A	W	A	W	A
ChrV	12.9	W	A	A	W	A	W	A	W	A	A	A	A	A	A	W	A	W	A	W	W	A	A	A	W	W	W	A	W	W	W	A	A	W	W	A	A	A	A	A	A	W	W	W	A	W	A	W	A
ChrV	13	W	A	A	W	A	W	A	W	A	A	A	A	A	A	W	A	W	A	W	W	A	A	A	W	W	W	A	W	W	W	A	A	W	W	A	A	A	A	A	A	W	W	W	A	W	A	W	A
ChrV	13.1	W	A	A	W	A	W	A	W	A	A	A	A	A	A	W	A	W	A	W	W	A	A	A	W	W	W	A	W	W	W	A	A	W	W	A	A	A	A	A	A	W	W	W	A	W	A	W	A
ChrV	13.2	W	A	A	W	A	W	A	W	A	A	A	A	A	A	W	A	W	A	W	W	A	A	A	W	W	W	A	W	W	W	A	A	W	W	A	A	A	A	A	A	W	W	W	A	W	A	W	A
ChrV	13.3	NA	A	A	W	A	W	A	NA	A	A	A	A	A	A	NA	A	W	A	W	W	NA	A	NA	W	NA	W	A	W	W	W	A	A	W	W	A	A	A	A	A	A	W	NA	NA	A	NA	A	W	A
ChrV	13.4	W	A	A	NA	A	W	A	W	A	A	A	A	A	A	NA	A	W	A	W	W	NA	A	A	W	W	W	A	W	W	W	A	A	NA	W	A	A	A	A	A	A	W	NA	W	A	W	A	W	A
ChrV	13.5	W	A	A	W	A	W	A	W	A	A	A	A	A	A	W	A	W	A	W	W	A	A	A	W	W	W	A	W	W	W	A	A	W	W	A	A	A	A	A	A	W	W	W	A	W	A	W	A
ChrV	13.6	W	A	A	W	A	W	A	W	A	A	A	A	A	A	W	A	W	A	W	W	A	A	A	W	W	W	A	W	W	W	A	A	W	W	A	A	A	A	A	A	W	W	W	A	W	NA	W	A
ChrV	13.7	NA	A	A	W	A	W	A	W	A	A	A	A	A	A	NA	A	W	A	W	NA	A	A	A	W	W	W	A	W	W	W	A	A	W	W	A	A	A	A	A	A	W	NA	W	A	W	A	NA	A
ChrV	13.8	W	A	A	NA	A	W	A	NA	A	A	A	NA	A	A	NA	A	W	A	W	NA	A	NA	A	W	W	NA	A	W	W	W	A	A	W	W	A	A	A	A	A	A	W	NA	NA	A	NA	NA	NA	A
ChrV	13.9	W	A	A	W	A	W	A	W	A	A	A	A	A	A	W	A	W	A	W	W	NA	A	A	W	W	W	A	W	W	W	A	A	NA	W	A	A	A	A	A	A	W	W	W	A	W	A	W	A
ChrV	14	W	A	A	W	A	W	A	W	A	A	A	A	A	A	W	A	W	A	W	W	NA	A	NA	W	W	W	NA	W	W	W	A	A	W	W	A	A	A	A	A	A	W	W	W	A	W	A	W	NA
ChrV	14.1	W	A	A	NA	A	W	A	NA	A	A	A	A	A	A	NA	A	W	A	W	NA	A	A	A	W	W	NA	NA	W	NA	W	A	A	W	W	A	A	A	A	A	A	W	W	W	A	W	A	W	A
ChrV	14.2	W	A	A	W	A	W	A	W	A	A	A	A	A	A	W	A	W	A	W	W	NA	A	A	W	W	W	A	W	W	W	A	A	W	W	A	A	A	A	A	A	W	W	W	A	W	A	W	A
ChrV	14.3	W	A	A	W	A	W	A	W	A	A	A	A	A	A	W	A	W	A	W	W	A	A	A	W	W	W	A	W	W	W	A	A	W	W	A	A	A	A	A	A	W	W	W	A	W	A	W	A
ChrV	14.4	NA	A	A	W	NA	W	A	NA	A	A	A	A	A	A	NA	A	W	A	W	NA	A	A	A	W	W	NA	A	W	NA	W	A	A	W	W	A	A	A	A	A	A	W	W	W	A	NA	A	W	A
ChrV	14.5	W	A	A	W	A	W	A	NA	A	A	A	A	A	A	W	A	W	A	W	W	A	A	A	W	W	W	A	W	W	W	A	A	W	W	A	A	A	A	A	A	W	W	NA	A	W	A	W	A
ChrV	14.6	W	A	A	W	A	W	NA	W	A	A	A	A	A	A	W	A	W	A	W	NA	A	A	A	W	W	W	NA	W	W	W	A	A	W	W	A	A	A	A	A	A	W	W	W	A	W	A	W	A
ChrV	14.7	W	A	A	W	A	W	A	W	A	A	A	A	A	A	W	A	W	A	W	W	A	A	A	W	W	W	A	W	W	W	A	A	W	W	A	A	A	A	A	A	W	W	W	A	W	A	W	A
ChrV	14.8	W	A	A	W	A	W	A	W	A	A	A	A	A	A	W	A	W	A	W	W	A	A	A	W	W	W	A	W	W	W	A	A	W	NA	A	A	A	A	A	A	W	W	W	A	W	A	W	A
ChrV	14.9	W	A	A	W	A	W	A	W	A	A	A	A	A	A	W	A	W	A	W	W	A	A	A	W	W	W	A	W	W	W	A	A	W	W	A	A	A	A	A	A	W	W	W	A	W	A	W	A
ChrV	15	W	A	A	W	A	W	A	W	A	A	A	A	NA	NA	W	NA	W	A	W	W	NA	A	A	W	W	W	A	W	W	W	A	A	W	W	A	A	A	A	A	A	W	W	W	A	W	NA	W	NA
ChrV	15.1	W	A	A	W	A	W	A	W	A	A	A	A	A	A	W	A	W	A	W	W	A	A	A	W	W	W	A	W	W	W	A	A	W	W	A	A	A	A	A	A	W	W	W	A	W	A	W	A
ChrV	15.2	W	A	A	W	A	W	A	W	A	A	A	A	A	A	W	A	W	A	W	W	A	A	A	W	W	W	A	W	W	W	A	A	W	W	A	A	A	A	A	A	W	W	W	A	W	A	W	A
ChrV	15.3	W	A	A	W	A	W	A	W	A	A	A	A	A	A	W	A	W	A	W	W	A	A	A	W	W	W	A	W	W	W	A	A	W	W	A	A	A	A	A	A	W	W	W	A	W	A	W	A
ChrV	15.4	W	A	A	W	A	W	A	W	A	A	A	A	A	A	W	A	W	A	W	W	NA	A	NA	W	W	W	A	W	W	W	A	A	W	W	A	A	A	A	A	A	W	W	W	A	W	A	W	A
ChrV	15.5	W	A	A	W	A	W	A	W	A	A	A	A	A	A	W	A	W	A	W	W	A	A	A	W	W	W	A	W	W	W	A	A	W	W	A	A	A	A	A	A	W	W	W	A	W	A	W	A
ChrV	15.6	W	A	A	W	A	W	A	W	A	A	A	A	A	A	W	A	W	A	W	W	A	A	A	W	W	W	A	W	W	W	A	A	W	NA	A	A	A	A	A	A	W	W	W	A	W	A	W	A
ChrV	15.7	W	A	A	W	A	W	A	W	A	A	A	A	A	A	W	A	W	A	W	W	A	A	A	W	W	W	A	W	W	W	A	A	W	W	A	A	A	A	A	A	W	W	W	A	W	A	W	A
ChrV	15.8	W	A	A	W	A	W	A	W	A	A	A	A	A	A	W	A	W	A	W	W	A	A	A	W	W	W	A	W	W	W	A	A	W	W	A	A	A	A	A	A	W	W	W	A	W	A	W	A
ChrV	15.9	W	A	A	W	A	W	A	W	A	A	A	A	A	A	NA	A	W	A	W	NA	A	A	A	W	W	NA	A	W	NA	W	A	A	W	NA	A	A	A	A	A	A	W	W	W	A	W	A	W	A
ChrV	16	W	A	A	NA	A	W	A	NA	A	A	A	A	A	A	W	A	W	A	W	W	A	A	A	W	W	NA	A	W	W	W	A	A	W	W	A	A	A	A	A	A	W	W	W	A	W	A	W	A
ChrV	16.1	W	A	A	W	A	W	A	W	A	A	A	A	A	A	NA	A	W	A	W	W	A	A	A	W	W	W	A	W	W	W	A	A	W	W	A	A	A	A	A	A	W	W	W	A	W	A	W	A
ChrV	16.2	W	A	A	W	A	W	A	W	A	A	A	A	A	A	NA	A	W	A	W	W	A	A	A	W	W	NA	A	W	W	W	A	A	W	NA	A	A	A	A	A	A	W	W	W	A	W	A	W	A
ChrV	16.3	W	A	A	W	A	W	A	W	A	A	A	A	A	A	W	A	W	A	W	W	A	A	A	W	W	W	A	W	W	W	A	A	W	W	A	A	A	A	A	A	W	W	W	A	W	A	W	A
ChrV	16.4	W	A	A	W	A	W	A	W	A	A	A	A	A	A	W	A	W	A	W	W	A	A	A	W	W	W	A	W	W	W	A	A	W	W	A	A	A	A	A	A	W	W	W	A	W	A	W	A
ChrV	16.5	W	A	A	NA	A	W	NA	W	A	A	A	A	A	A	W	A	W	A	W	NA	A	A	A	W	W	W	A	W	W	W	A	A	W	W	A	A	A	A	A	A	W	W	NA	A	NA	A	W	A
ChrV	16.6	W	A	A	W	A	W	A	W	A	A	A	A	A	A	W	A	W	A	W	W	A	A	A	W	W	W	A	W	W	W	A	A	W	W	A	A	A	A	A	A	W	W	W	A	W	A	W	A
ChrV	16.7	W	A	A	W	A	W	A	NA	A	A	A	A	A	A	W	A	W	A	W	NA	A	A	A	W	W	W	A	W	W	W	A	A	W	NA	A	A	A	A	A	A	W	W	W	A	W	A	W	A
ChrV	16.8	W	A	A	W	A	W	A	W	A	A	A	A	A	A	W	A	W	A	W	W	A	A	A	W	W	NA	A	W	W	W	A	A	W	NA	A	A	A	A	A	A	W	W	W	A	W	A	W	A
ChrV	16.9	W	A	A	W	A	W	A	W	A	A	A	A	A	A	NA	A	W	A	W	W	NA	A	A	W	W	W	A	W	W	W	A	A	W	W	A	A	A	A	A	A	W	W	W	A	W	A	W	A
ChrV	17	W	A	A	W	A	W	A	W	A	A	A	A	A	A	W	A	W	A	W	W	A	A	A	W	W	W	A	W	W	W	A	A	W	W	A	A	A	A	A	A	W	W	W	A	W	A	W	NA
ChrV	17.2	W	A	A	W	A	W	A	W	A	A	A	A	A	A	W	A	W	A	W	W	A	A	A	W	W	W	A	W	W	W	A	A	W	W	A	A	A	A	A	A	W	W	W	A	W	A	W	A
ChrV	17.3	W	A	A	W	A	W	A	W	A	A	A	A	A	A	NA	A	W	A	W	NA	A	A	A	W	W	W	NA	W	NA	W	A	A	W	W	A	A	A	A	A	A	W	W	W	A	NA	A	W	A
ChrV	17.4	W	A	A	W	A	W	A	W	A	A	A	A	A	A	W	A	W	A	W	W	A	A	A	W	W	W	A	W	W	W	A	A	W	W	A	A	A	A	A	A	W	W	W	A	W	A	W	A
ChrV	17.5	W	A	A	W	A	W	A	W	A	A	A	A	A	A	NA	A	W	A	W	W	A	A	A	W	W	W	A	W	W	W	A	A	W	W	A	A	A	A	A	A	W	W	W	A	W	A	W	A
ChrV	17.6	W	A	A	W	A	W	A	W	A	A	A	A	A	A	W	A	W	A	W	W	A	A	A	W	W	W	A	W	W	W	A	A	W	W	A	A	A	A	A	A	W	W	W	A	W	A	W	A
ChrV	17.7	W	A	A	W	A	W	A	W	A	A	A	A	A	A	W	A	W	A	W	W	A	A	A	W	W	W	A	W	W	W	A	A	W	NA	A	A	A	A	A	A	W	W	W	A	W	A	W	A
ChrV	17.8	W	A	A	W	A	W	A	W	A	A	A	A	NA	A	W	A	W	A	W	W	NA	A	A	W	W	W	A	W	W	W	NA	A	W	W	A	A	A	A	A	A	W	W	W	A	W	NA	W	A
ChrV	17.9	W	A	A	W	A	W	A	W	A	A	A	A	A	A	W	A	W	A	W	W	A	A	A	W	W	W	A	W	W	W	A	A	W	W	A	A	A	A	A	A	W	W	W	A	W	A	W	A
ChrV	18	W	A	A	W	A	W	A	NA	A	A	A	A	A	A	NA	A	W	A	W	NA	A	A	A	W	W	W	A	W	W	W	A	A	W	NA	A	A	A	A	A	A	W	W	W	A	W	A	W	A
ChrV	18.1	W	A	A	W	A	W	A	W	A	A	A	A	A	A	W	A	W	A	W	W	A	A	A	W	W	W	A	W	W	W	A	A	W	W	A	A	A	A	A	A	W	W	W	A	W	A	W	A
ChrV	18.2	W	A	A	W	A	W	A	W	A	A	A	A	A	A	NA	A	W	A	W	NA	NA	A	A	W	W	NA	A	W	W	W	A	A	W	NA	A	A	A	A	A	A	W	W	W	A	NA	A	W	A
ChrV	18.3	W	A	A	W	A	W	A	W	A	A	A	A	A	A	W	A	W	A	W	NA	A	A	A	W	W	W	A	W	W	W	A	A	W	NA	A	A	A	A	A	A	W	W	W	A	W	A	W	A
ChrV	18.4	W	NA	A	W	A	W	A	NA	A	A	A	A	A	A	W	A	W	A	W	NA	A	A	A	W	W	W	A	W	W	W	A	A	W	W	A	A	A	A	A	A	W	W	W	A	W	A	W	A
ChrV	18.5	W	A	A	W	A	W	A	W	A	A	A	A	A	A	W	A	W	A	W	W	A	A	A	W	W	W	A	NA	W	W	A	A	W	W	A	A	A	A	A	A	W	W	W	A	W	A	W	A
ChrV	18.6	W	A	A	W	A	W	A	W	A	A	A	A	A	A	W	A	W	A	W	W	A	A	A	W	W	W	A	W	W	W	A	A	W	NA	A	A	A	A	A	A	W	W	W	A	W	A	W	A
ChrV	18.7	W	A	A	W	A	W	A	W	A	A	A	A	A	A	W	A	W	A	W	W	A	A	A	W	W	W	NA	W	W	W	A	A	W	W	A	A	A	A	A	A	NA	W	W	A	W	A	W	A
ChrV	18.8	W	A	A	W	A	W	A	W	A	A	A	A	A	A	NA	A	W	A	W	W	A	A	A	W	W	NA	W	W	NA	W	A	A	W	NA	A	A	A	A	A	A	W	W	NA	A	W	A	W	A
ChrV	18.9	W	A	A	W	A	W	A	W	A	A	A	A	A	A	W	A	W	A	W	W	A	A	A	W	W	W	W	W	W	W	A	A	W	NA	A	A	A	A	A	A	W	W	W	A	W	A	W	A
ChrV	19	W	A	A	W	A	W	A	NA	A	A	A	A	A	A	W	A	W	A	W	W	A	A	A	W	W	W	W	W	W	W	A	A	W	W	A	A	A	A	A	A	W	W	W	A	W	A	W	A
ChrV	19.1	W	A	A	W	A	W	A	W	A	A	A	A	A	A	NA	A	W	A	W	W	A	A	A	W	W	W	NA	W	W	W	A	A	W	W	A	A	A	A	A	A	W	W	W	A	W	A	W	A
ChrV	19.2	W	A	A	W	A	W	A	NA	A	A	A	A	A	A	NA	A	W	A	W	NA	A	A	A	W	W	W	W	W	W	W	A	A	W	NA	A	A	A	A	A	A	W	W	W	A	W	A	W	A
ChrV	19.3	W	A	A	W	A	W	A	A	A	A	A	A	A	A	NA	A	W	A	W	W	A	A	A	W	W	NA	W	W	W	W	A	A	W	NA	A	A	A	A	A	A	W	W	W	A	W	A	W	A
ChrV	19.4	W	A	A	W	A	W	A	A	A	A	A	A	A	A	NA	A	W	A	W	W	A	A	A	W	W	W	W	W	W	W	A	A	W	W	A	A	A	A	A	A	W	W	W	A	W	A	W	A
ChrV	19.5	W	A	A	W	A	W	A	A	NA	A	A	A	A	A	W	A	W	A	W	W	A	A	A	W	W	W	NA	W	W	W	A	A	W	W	A	A	A	A	A	A	W	W	W	A	W	A	W	A
ChrV	19.6	W	A	A	W	A	W	A	A	W	A	A	A	A	A	W	A	W	A	W	W	A	A	A	W	W	W	W	W	W	W	A	A	W	W	A	A	A	A	A	A	W	W	W	A	W	A	W	A
ChrV	19.7	W	A	A	W	A	W	A	A	W	A	A	A	A	NA	W	A	W	A	W	W	A	A	A	W	W	W	W	W	W	W	A	A	W	W	A	A	A	A	A	A	W	W	W	A	W	A	W	A
ChrV	19.9	W	A	A	W	A	W	A	A	W	A	A	A	A	A	W	A	NA	A	W	W	A	A	A	W	W	NA	W	W	W	W	A	A	W	W	A	A	A	A	A	A	W	W	W	A	W	A	W	A
ChrV	20	W	A	NA	W	A	W	A	A	W	A	A	A	A	A	W	A	W	A	W	W	A	A	A	W	W	W	W	W	W	W	A	A	W	W	A	A	A	A	A	A	W	W	W	A	W	A	W	A
ChrV	20.1	W	A	A	W	A	W	A	A	W	A	A	A	A	A	W	A	W	A	W	W	A	A	A	W	W	W	NA	W	W	W	A	A	W	W	A	A	A	A	A	A	W	W	W	A	W	A	W	A
ChrV	20.2	W	A	A	W	A	W	A	A	W	A	A	A	A	A	W	A	W	A	W	W	A	A	A	W	W	W	NA	W	W	W	A	A	W	W	A	A	A	A	A	A	W	W	W	A	W	A	W	A
ChrV	20.3	W	A	A	W	A	W	A	A	W	A	A	A	A	A	W	A	W	A	W	NA	NA	A	A	W	W	W	W	W	W	W	A	A	W	W	A	A	A	A	A	A	W	A	W	A	W	A	W	A
ChrV	20.4	NA	A	A	NA	A	W	A	A	NA	A	A	A	A	A	NA	A	W	A	W	W	A	A	A	W	W	NA	NA	NA	NA	W	A	A	W	W	A	A	A	A	A	A	NA	A	W	A	W	A	NA	A
ChrV	20.5	W	W	A	W	A	W	A	A	NA	A	W	A	A	A	W	A	W	A	W	W	A	A	A	W	W	W	NA	W	W	W	A	A	W	W	W	W	A	A	A	A	W	A	W	A	W	A	W	A
ChrV	20.6	W	W	A	NA	A	W	A	NA	W	A	W	A	A	A	W	A	W	A	W	W	A	A	A	W	W	W	W	W	W	W	A	A	W	W	W	W	A	A	A	A	W	A	W	A	W	A	W	A
ChrV	20.7	W	W	A	W	A	W	A	A	W	A	W	A	A	A	W	A	W	A	W	W	NA	A	A	W	W	W	W	W	W	W	A	A	W	W	W	W	A	A	A	A	W	A	W	A	W	A	W	A
ChrV	20.8	W	W	A	W	A	W	A	A	W	A	W	NA	A	A	W	A	W	A	W	W	A	A	A	W	W	W	W	W	W	W	A	A	W	W	W	W	NA	A	A	A	W	A	W	A	W	A	W	A
ChrV	20.9	W	W	A	W	A	W	A	A	W	A	W	A	A	A	W	A	W	A	W	W	A	A	A	W	W	W	W	W	W	W	A	A	W	W	W	W	A	A	A	A	W	A	W	A	W	A	W	A
ChrV	21	W	NA	A	W	A	W	A	A	W	A	W	A	A	A	NA	A	W	A	W	NA	NA	A	A	W	W	NA	NA	W	NA	W	NA	A	W	W	W	W	A	A	A	A	NA	A	W	A	W	A	W	A
ChrV	21.1	NA	NA	A	W	NA	W	A	NA	W	A	W	A	A	A	NA	NA	W	A	W	NA	NA	A	A	W	W	NA	NA	W	W	W	W	A	W	NA	W	W	A	A	A	A	NA	A	W	NA	NA	A	W	A
ChrV	21.2	W	W	A	W	A	W	NA	A	W	A	W	A	A	A	W	A	W	A	W	W	A	A	A	W	W	W	W	W	W	W	W	A	W	NA	W	W	A	A	A	A	W	A	W	A	W	A	W	A
ChrV	21.3	W	W	A	W	A	W	A	A	W	A	W	A	A	A	W	A	W	A	W	NA	A	A	A	W	W	W	W	W	W	W	W	A	W	W	W	W	A	A	A	A	W	A	W	A	W	A	W	A
ChrV	21.4	W	W	A	W	A	W	A	A	W	A	W	A	A	A	W	A	W	A	W	W	A	A	A	W	W	W	W	W	W	W	W	A	W	W	W	W	A	A	A	A	W	A	W	A	W	A	W	A
ChrV	21.5	W	W	A	W	A	W	A	A	W	A	W	A	A	A	W	A	W	A	W	W	A	A	A	W	W	W	W	W	W	W	W	A	W	W	W	W	A	A	A	A	W	A	W	A	W	A	W	A
ChrV	21.6	W	W	A	W	A	W	A	A	W	A	W	A	A	A	W	A	W	A	W	W	A	A	A	W	W	W	W	W	W	W	W	A	W	W	W	W	A	A	A	A	W	A	W	A	W	A	W	A
ChrV	21.8	W	W	A	W	A	W	A	NA	W	A	W	NA	A	A	W	A	W	A	W	NA	A	W	A	W	W	W	W	W	W	W	W	A	W	W	W	W	A	NA	A	A	W	NA	W	A	W	A	W	A
ChrV	21.9	W	W	A	W	A	W	A	A	W	A	W	A	A	A	W	A	W	A	W	W	A	W	A	W	W	W	NA	W	W	W	W	A	W	W	W	W	A	A	A	A	W	A	W	A	W	A	W	A
ChrV	22	W	NA	A	W	W	W	A	A	W	NA	W	A	A	A	W	NA	W	A	W	NA	NA	W	A	NA	W	NA	NA	NA	W	W	NA	A	W	W	W	W	A	A	A	A	NA	NA	NA	A	W	A	NA	A
ChrV	22.1	W	W	A	W	W	W	A	A	W	A	W	A	A	A	W	A	W	A	W	W	A	W	A	A	W	W	W	W	W	W	W	A	W	W	W	W	A	A	A	A	W	A	W	A	W	A	W	A
ChrV	22.2	W	W	A	W	W	W	A	A	W	A	W	A	A	A	W	A	W	A	W	W	A	W	A	A	W	NA	NA	W	NA	W	W	A	W	W	W	W	A	A	A	A	W	A	W	A	W	A	W	A
ChrV	22.3	W	W	A	W	W	W	A	A	W	A	W	A	A	A	W	A	W	A	W	W	A	W	A	A	W	W	NA	NA	W	W	W	A	W	W	W	W	A	A	A	A	W	A	W	A	W	A	W	A
ChrV	22.4	W	W	A	W	W	W	A	A	W	A	W	A	A	A	W	A	W	A	W	W	A	W	A	A	W	W	W	W	W	W	W	A	W	W	W	W	A	A	A	A	A	A	W	A	W	A	W	A
ChrV	22.5	W	W	A	W	W	W	A	A	W	A	W	A	A	A	NA	A	W	A	W	W	A	W	A	A	W	W	W	W	W	W	W	A	W	W	W	W	A	A	A	A	A	A	W	A	A	A	W	A
ChrV	22.6	W	NA	NA	W	W	NA	NA	A	W	A	NA	A	NA	A	W	A	W	A	W	NA	A	NA	A	A	NA	W	W	W	W	W	W	A	W	W	NA	NA	A	A	A	A	A	A	W	A	A	NA	W	A
ChrV	22.7	W	W	A	W	W	W	A	A	W	A	W	A	A	A	W	A	W	A	W	W	A	W	A	A	W	W	W	NA	W	W	W	A	W	NA	W	W	A	A	A	A	A	A	W	A	A	A	W	A
ChrV	22.8	W	W	A	W	W	W	A	A	W	A	W	A	A	A	W	A	W	A	W	W	A	W	A	A	W	W	W	W	W	W	W	A	W	W	W	W	A	A	A	A	A	A	W	A	A	A	W	A
ChrV	22.9	W	W	A	W	W	W	A	A	W	A	W	A	A	A	NA	A	W	A	W	W	NA	W	A	A	W	W	W	W	W	W	W	A	W	W	W	W	A	A	A	A	A	A	W	A	A	A	W	A
ChrV	23	W	W	A	W	W	W	A	A	W	A	W	A	A	A	W	A	W	A	W	NA	A	W	A	A	W	NA	W	NA	W	W	W	A	W	W	W	W	A	A	A	A	A	A	W	A	A	A	W	A
ChrV	23.1	W	W	NA	W	W	W	A	A	W	NA	W	A	A	A	NA	A	W	A	W	W	A	NA	A	A	W	W	W	W	W	W	W	A	W	W	W	W	A	A	A	A	A	A	W	A	A	A	W	A
ChrV	23.2	W	W	A	W	W	W	A	A	W	A	W	A	A	A	W	A	W	A	W	W	A	W	A	A	W	W	W	W	W	W	W	A	W	W	W	W	A	A	A	A	A	A	W	A	A	A	W	A
ChrV	23.3	W	W	A	W	W	W	A	A	W	A	W	A	A	A	NA	A	W	A	W	W	A	NA	A	A	W	W	NA	W	W	W	W	A	W	W	W	W	A	A	A	A	A	A	W	A	A	A	W	A
ChrV	23.4	W	W	A	W	W	W	A	A	W	A	W	A	A	A	W	A	W	A	W	W	A	NA	NA	A	W	W	W	W	W	W	W	A	W	W	W	W	A	A	A	A	A	A	W	A	A	A	W	A
ChrV	23.5	W	W	A	W	W	W	A	A	W	A	W	A	A	A	W	A	W	A	W	W	A	W	A	A	W	W	W	W	W	W	W	A	W	W	W	W	A	A	A	A	A	A	W	A	A	A	W	A
ChrV	23.6	W	NA	A	W	W	W	A	A	W	A	W	A	A	A	W	A	W	A	W	W	A	NA	A	A	W	W	NA	W	W	W	W	A	W	W	W	W	A	A	A	A	A	A	NA	A	A	A	W	A
ChrV	23.7	W	W	A	W	W	W	A	A	W	A	W	A	A	A	W	A	W	A	W	W	A	W	A	A	W	W	W	W	W	W	W	A	W	NA	W	W	A	A	A	A	A	A	W	A	A	A	W	A
ChrV	23.8	W	W	A	W	W	W	A	A	W	A	W	A	A	A	NA	A	W	A	W	W	A	W	A	A	W	W	W	W	W	W	W	A	W	W	W	W	A	A	A	A	A	A	W	A	A	A	W	A
ChrX	0	W	W	W	W	W	W	W	W	W	W	W	W	W	W	W	W	W	W	W	W	W	W	W	W	W	W	W	W	W	W	W	W	W	NA	W	W	W	W	W	W	W	W	W	W	W	NA	W	W
ChrX	0.1	W	W	W	W	W	W	W	W	W	W	W	W	W	W	W	W	W	W	W	W	NA	W	W	W	W	W	NA	W	W	W	W	W	W	W	W	W	W	W	W	W	W	W	W	W	W	W	W	W
ChrX	0.2	W	W	W	W	W	W	W	W	W	W	W	W	W	W	W	W	W	W	W	W	W	W	NA	W	W	W	W	W	W	W	W	W	W	W	W	W	W	W	W	W	W	W	W	W	W	W	W	W
ChrX	0.3	W	W	NA	W	W	W	NA	W	W	W	W	W	W	W	W	W	W	W	W	W	NA	W	W	W	W	NA	W	W	W	W	W	W	W	W	W	W	W	W	W	W	W	W	W	W	W	W	W	W
ChrX	0.4	W	W	W	W	W	W	W	W	W	W	W	W	W	W	W	W	W	W	W	W	W	W	W	W	W	W	W	W	W	W	W	W	W	W	W	W	W	W	W	W	W	W	W	W	W	W	W	NA
ChrX	0.5	W	W	W	W	W	W	W	W	W	W	W	W	W	W	W	W	W	W	W	W	W	W	W	W	W	W	W	W	W	W	W	W	W	W	W	W	W	W	W	W	W	W	W	W	W	W	W	W
ChrX	0.7	W	W	W	W	W	W	W	W	W	W	W	W	W	W	W	W	W	W	W	W	W	W	W	W	W	W	W	W	W	W	W	W	W	W	W	W	W	W	W	W	W	W	W	W	W	W	W	W
ChrX	0.8	W	W	W	W	W	W	W	W	W	W	W	W	W	W	W	W	W	W	W	W	W	W	W	W	W	W	W	W	W	W	W	W	W	W	W	W	W	W	W	W	W	W	W	W	W	W	W	W
ChrX	0.9	W	W	W	W	W	W	W	W	W	W	W	W	W	W	W	W	W	W	W	W	W	W	W	W	W	W	NA	W	W	W	W	W	W	W	W	W	W	W	W	W	W	W	W	W	W	W	W	W
ChrX	1	W	W	W	W	W	W	W	W	W	W	W	W	W	W	W	W	W	W	W	W	W	W	W	W	W	W	W	W	W	W	W	W	W	W	W	W	W	W	W	W	W	W	W	W	W	W	W	W
ChrX	1.1	W	W	W	W	W	W	W	W	W	W	W	W	W	W	W	W	NA	W	W	W	W	W	W	W	W	W	W	W	W	W	W	W	W	W	W	W	W	W	W	W	W	W	W	W	W	W	W	W
ChrX	1.2	W	W	W	W	W	W	W	W	W	W	W	W	W	W	W	W	W	W	W	W	W	W	W	W	W	W	W	W	W	W	W	W	W	W	W	W	W	W	W	W	W	W	W	W	W	W	W	W
ChrX	1.3	W	W	W	W	W	W	W	W	W	W	W	W	W	W	W	W	W	W	W	W	W	W	W	W	W	W	W	W	W	W	W	W	W	W	W	W	W	W	W	W	W	W	W	W	W	W	W	W
ChrX	1.4	W	W	W	W	W	W	W	W	W	W	W	W	W	W	W	W	W	W	W	W	W	W	W	W	W	W	W	W	W	W	W	W	W	W	W	W	W	W	W	W	W	W	W	W	W	W	W	W
ChrX	1.5	W	W	NA	W	W	W	W	W	W	W	W	W	W	W	W	W	W	W	W	NA	NA	W	W	W	W	W	W	W	W	W	W	NA	W	W	W	W	W	W	W	W	W	W	W	W	W	W	W	W
ChrX	1.6	W	W	W	W	W	W	W	W	W	W	W	W	W	W	W	W	W	W	W	W	W	W	W	W	W	W	W	W	W	W	W	W	W	W	W	W	W	W	W	W	W	W	W	W	W	W	W	W
ChrX	1.7	W	W	W	W	W	W	W	W	W	W	W	W	W	W	W	W	W	W	W	W	W	W	W	W	W	W	W	W	W	W	W	W	W	W	W	W	W	W	W	W	W	W	W	W	W	W	W	NA
ChrX	1.8	W	W	W	W	W	W	W	W	W	W	W	W	W	W	W	W	W	W	W	W	W	W	W	W	W	W	W	W	W	W	W	W	W	W	W	W	W	W	W	W	W	W	W	W	W	NA	W	W
ChrX	1.9	W	W	W	W	W	W	W	W	W	W	W	W	W	W	W	W	W	W	W	W	W	W	W	W	W	W	W	W	W	W	W	W	W	W	W	W	W	W	W	W	W	W	W	W	W	W	W	W
ChrX	2	W	W	W	W	W	W	W	W	W	W	W	W	W	W	W	W	W	W	W	W	W	W	W	W	W	W	W	W	W	W	W	W	W	W	W	W	W	W	W	W	W	W	W	W	W	W	W	W
ChrX	2.1	W	NA	W	W	NA	W	W	W	W	W	W	W	W	W	W	W	W	W	W	W	W	W	W	W	NA	W	NA	W	W	W	W	NA	W	W	W	W	W	NA	W	W	NA	W	W	NA	W	W	W	W
ChrX	2.2	W	NA	W	W	W	W	W	W	W	W	W	NA	W	W	W	W	W	NA	W	W	W	W	W	W	NA	NA	W	W	NA	W	W	W	NA	W	W	NA	W	W	W	W	W	NA	W	NA	W	NA	W	W
ChrX	2.3	W	W	W	W	W	NA	W	W	W	W	W	W	W	W	W	W	W	W	W	W	W	W	W	W	W	W	W	W	W	W	W	W	W	W	W	W	W	W	W	W	W	W	W	W	W	W	W	W
ChrX	2.4	W	W	W	W	W	W	W	W	W	W	W	W	W	W	W	W	W	W	W	W	W	W	W	W	W	W	NA	W	W	W	W	W	W	W	W	W	W	W	W	W	W	W	W	W	W	W	W	W
ChrX	2.5	W	W	W	W	W	W	W	W	W	W	W	W	W	W	W	W	W	W	W	W	W	W	W	W	W	W	W	W	W	W	W	W	W	W	W	W	W	W	W	W	W	W	W	W	W	W	W	W
ChrX	2.6	W	W	W	W	W	W	W	W	W	W	W	W	W	W	W	W	W	W	W	W	W	W	W	W	W	W	W	W	W	W	W	W	W	W	W	W	W	W	W	W	W	W	W	W	W	W	W	W
ChrX	2.7	W	W	W	NA	W	W	W	W	W	W	W	W	W	NA	NA	W	NA	W	NA	W	W	W	W	W	W	W	W	NA	W	W	W	NA	W	W	W	W	NA	W	W	W	W	W	W	NA	W	W	W	W
ChrX	2.8	W	W	W	W	W	W	W	W	W	W	W	W	W	W	W	W	W	W	W	W	W	W	W	W	W	W	W	W	W	W	W	W	W	W	W	W	W	W	W	W	W	W	W	W	W	W	W	W
ChrX	2.9	W	W	W	W	W	W	W	W	W	W	W	W	W	W	W	W	W	W	W	W	W	W	W	W	W	W	W	W	W	W	W	W	W	W	W	W	W	W	W	W	W	W	W	W	W	W	W	W
ChrX	3	W	W	W	W	W	W	W	W	W	W	W	W	W	NA	W	W	NA	W	W	W	W	W	W	W	W	W	W	W	NA	W	W	W	W	W	W	W	W	W	W	W	W	W	W	W	W	W	W	W
ChrX	3.1	W	W	W	W	W	W	W	W	W	W	W	W	W	W	W	W	W	W	W	W	W	W	W	W	W	W	W	W	W	W	W	W	W	W	W	W	W	W	W	W	W	W	W	W	W	W	W	W
ChrX	3.2	W	W	W	W	W	W	W	W	W	W	W	W	W	W	W	W	NA	W	W	W	W	W	W	W	W	NA	W	W	W	W	W	W	W	W	W	W	W	W	W	W	W	W	W	W	W	W	W	W
ChrX	3.3	W	W	W	W	W	W	W	W	W	W	W	W	W	W	W	W	W	W	W	W	W	W	W	W	W	W	W	W	W	W	W	W	W	W	W	W	W	W	W	W	W	W	W	W	W	W	W	W
ChrX	3.4	W	W	W	W	W	W	W	W	W	W	W	W	W	W	W	W	W	W	W	W	W	W	W	W	W	W	W	W	W	W	W	W	W	W	W	W	W	W	W	W	W	W	W	W	W	W	W	W
ChrX	3.5	W	W	W	W	W	W	W	W	W	W	W	W	W	W	W	W	W	W	W	W	W	W	W	W	W	W	W	W	W	W	W	W	W	W	W	W	W	W	W	W	W	W	W	W	W	W	W	W
ChrX	3.6	W	W	W	W	W	W	W	W	W	W	W	W	W	W	W	W	W	W	W	W	W	W	W	W	W	W	NA	W	W	W	W	W	W	W	W	W	W	W	W	W	W	W	W	W	W	W	W	NA
ChrX	3.7	W	W	W	W	W	W	W	W	W	W	W	W	W	W	W	W	W	W	W	W	W	W	W	W	W	W	W	W	W	W	W	W	W	W	W	W	W	W	W	W	W	W	W	W	W	W	W	W
ChrX	3.8	W	W	W	W	W	W	W	W	W	W	W	W	W	W	W	W	W	W	W	W	W	W	W	W	W	W	W	W	W	W	W	W	W	W	W	W	W	W	W	W	W	W	W	W	W	W	W	W
ChrX	3.9	W	W	W	W	W	W	W	W	W	W	W	W	W	W	W	W	W	W	W	W	W	W	W	W	W	W	W	W	W	W	W	W	W	W	W	W	W	W	W	W	W	W	W	W	W	W	W	W
ChrX	4	W	W	W	W	W	W	W	W	W	W	W	W	W	W	W	W	W	NA	W	W	W	W	W	W	W	W	W	W	W	W	W	W	W	W	W	W	W	W	W	W	W	W	W	W	W	NA	W	W
ChrX	4.1	W	W	W	W	W	W	W	W	W	W	W	W	W	W	W	W	W	W	W	W	W	W	W	W	W	W	W	W	W	W	W	W	W	W	W	W	W	W	W	W	W	W	W	W	W	W	W	W
ChrX	4.2	W	W	W	W	W	W	W	W	W	W	W	W	W	NA	W	W	W	W	W	W	W	W	W	W	W	W	W	W	W	W	W	W	W	NA	W	W	W	W	W	W	W	W	W	W	W	W	W	W
ChrX	4.3	W	W	W	W	W	W	W	W	W	W	W	W	W	NA	NA	W	W	W	W	W	W	W	W	W	W	W	W	W	W	W	W	W	W	W	W	W	W	W	W	W	W	W	W	W	W	W	W	W
ChrX	4.4	W	W	W	W	W	W	W	W	W	W	W	W	W	NA	W	W	W	W	W	W	W	W	W	W	W	W	W	W	W	W	W	W	W	W	W	W	W	W	W	W	W	W	W	W	W	NA	W	W
ChrX	4.5	W	W	W	W	W	W	W	W	W	W	W	W	W	W	W	W	W	W	W	W	W	W	W	W	W	W	W	W	W	W	W	W	W	W	W	W	W	W	W	W	W	W	W	W	W	W	W	W
ChrX	4.6	W	W	W	W	W	W	W	W	W	W	W	W	W	W	W	W	W	W	W	W	W	W	W	W	W	W	W	W	W	W	W	W	W	W	W	W	W	W	W	W	W	W	W	W	W	W	W	W
ChrX	4.7	W	W	W	W	W	W	W	W	W	W	W	W	W	W	W	W	W	W	W	W	W	W	W	W	W	W	W	W	W	W	W	W	W	W	W	W	W	W	W	W	W	W	W	W	W	W	W	W
ChrX	4.8	W	W	W	W	W	W	W	W	W	W	W	W	W	W	W	W	W	W	W	W	W	W	W	W	W	W	W	W	W	W	W	W	W	W	W	W	W	W	W	W	W	W	W	W	W	W	W	W
ChrX	4.9	W	W	W	W	W	W	W	W	W	W	W	W	W	W	W	W	W	W	W	W	W	W	W	W	W	W	W	W	W	W	W	W	W	W	W	W	W	W	W	W	W	W	W	W	W	NA	W	W
ChrX	5	W	W	W	W	W	W	W	W	W	W	W	W	W	W	W	W	NA	W	W	W	W	W	NA	W	W	NA	W	W	W	W	W	W	W	W	W	W	W	W	W	W	W	W	W	W	W	W	W	W
ChrX	5.1	W	W	W	W	W	W	W	W	W	W	W	W	W	W	W	W	W	W	W	W	W	W	NA	W	W	W	W	W	W	W	W	W	W	W	W	W	W	W	W	W	W	W	W	W	W	W	W	W
ChrX	5.2	W	W	W	W	W	W	W	W	W	W	W	W	W	W	W	W	W	W	W	W	W	W	W	W	W	W	W	W	W	W	W	W	W	W	W	W	W	W	W	W	W	W	W	W	W	W	W	W
ChrX	5.3	W	W	W	W	W	W	W	NA	W	W	W	W	W	W	W	W	W	W	W	W	W	W	W	W	W	W	W	W	W	W	W	W	W	W	W	W	W	W	W	W	W	W	W	W	W	W	W	W
ChrX	5.4	W	W	W	NA	W	W	W	W	W	W	W	W	W	W	W	W	W	W	W	W	W	W	W	W	W	W	W	W	W	W	W	W	W	W	W	W	W	W	W	W	W	W	W	W	W	W	W	W
ChrX	5.5	W	W	W	W	W	W	W	W	W	W	W	W	W	W	W	W	W	W	W	W	W	W	W	W	W	W	W	W	W	W	W	W	W	W	W	W	W	W	W	W	W	W	W	W	W	W	W	W
ChrX	5.6	W	W	W	W	W	W	W	W	W	W	W	W	W	W	W	W	W	W	W	W	W	W	W	W	W	W	W	W	W	W	W	W	W	W	W	W	W	W	W	W	W	W	W	W	W	W	W	W
ChrX	5.7	W	W	W	W	W	W	W	W	W	W	W	W	W	W	NA	W	W	W	W	W	W	W	W	W	W	W	W	W	W	W	W	W	W	W	W	W	W	W	W	W	W	W	W	W	W	W	W	W
ChrX	5.8	W	W	W	W	W	W	W	W	W	W	W	W	W	NA	W	W	W	W	W	W	W	W	W	W	W	W	W	W	W	W	W	W	W	W	W	W	W	W	W	W	W	W	W	W	W	W	W	W
ChrX	5.9	W	W	W	W	W	W	W	W	W	W	W	W	W	W	W	W	W	W	W	W	W	W	W	W	W	W	W	W	W	W	W	W	W	W	W	W	W	W	W	W	W	W	W	W	W	W	W	W
ChrX	6	W	W	W	W	W	W	W	W	W	W	W	W	W	W	W	W	W	W	W	W	W	W	W	W	W	W	W	W	W	W	W	W	W	W	W	W	W	W	W	W	W	W	W	W	W	W	W	W
ChrX	6.1	W	W	W	W	W	W	W	W	W	W	W	W	W	W	W	W	W	W	W	W	W	W	W	W	W	W	W	W	W	W	W	W	W	W	W	W	W	W	W	W	W	W	W	W	W	W	W	W
ChrX	6.2	W	W	W	W	W	W	NA	W	W	W	W	W	W	W	W	W	W	W	W	W	W	W	W	W	W	W	W	W	W	W	W	W	W	W	W	W	W	W	W	W	W	W	W	W	W	W	W	W
ChrX	6.3	W	W	W	W	W	W	W	W	W	W	W	W	W	W	W	W	W	W	W	W	W	W	W	W	W	W	W	W	W	W	W	W	W	W	W	W	W	W	W	W	W	W	W	W	W	W	W	W
ChrX	6.4	W	W	W	W	W	W	W	W	W	W	W	W	W	W	W	W	W	W	W	W	W	W	W	W	W	W	W	W	W	W	W	W	W	W	W	W	W	W	W	W	W	W	W	W	W	W	W	W
ChrX	6.6	W	W	W	W	W	W	W	W	W	W	W	W	W	W	W	W	W	W	W	W	W	W	W	W	W	W	W	W	W	W	W	W	W	NA	W	W	W	W	W	W	W	W	W	W	W	W	W	W
ChrX	6.7	W	W	W	W	W	W	W	W	W	W	W	W	W	W	W	W	W	W	W	W	W	W	W	W	W	W	W	W	W	W	W	W	W	W	W	W	W	W	W	W	W	W	W	W	W	W	W	NA
ChrX	6.8	W	W	W	W	W	W	W	W	W	W	W	W	W	W	W	W	W	W	W	W	W	W	W	W	W	W	W	W	W	W	W	W	W	W	W	W	W	W	W	W	W	W	W	W	W	W	W	W
ChrX	6.9	W	W	W	W	W	W	W	W	W	W	W	W	W	W	W	W	W	W	W	W	W	W	W	W	W	W	W	W	W	W	W	W	W	W	W	W	W	W	W	W	W	W	W	W	W	W	W	W
ChrX	7	W	W	W	W	W	W	W	W	W	W	W	W	W	W	W	W	W	W	W	W	W	W	W	W	W	W	W	W	W	W	W	W	W	W	W	W	W	W	W	W	W	W	W	W	W	W	W	W
ChrX	7.1	W	W	W	W	W	W	W	W	W	W	W	W	W	W	W	W	W	W	W	W	W	W	W	W	W	W	W	W	W	W	W	W	W	W	W	W	W	W	W	W	W	W	W	W	W	NA	W	W
ChrX	7.2	W	W	W	W	W	W	W	W	W	W	W	W	W	W	W	W	W	W	W	W	W	W	W	W	W	W	W	W	W	W	W	W	W	W	W	W	W	W	W	W	W	W	W	W	W	W	W	W
ChrX	7.3	W	W	W	W	W	W	W	W	W	W	W	W	W	W	W	W	W	W	W	W	W	W	W	W	W	W	W	W	W	W	W	W	W	W	W	W	W	W	W	W	W	W	W	W	W	W	W	W
ChrX	7.4	W	W	W	W	W	W	W	W	W	W	W	W	W	W	NA	W	W	W	W	W	W	W	W	W	W	W	W	W	W	W	W	W	W	W	W	W	W	W	W	W	W	NA	W	W	W	W	W	W
ChrX	7.5	W	W	W	W	W	W	W	W	W	W	W	W	W	W	W	W	W	W	W	W	W	W	W	W	W	W	W	W	W	W	W	W	W	W	W	W	W	W	W	W	W	W	W	W	W	W	W	W
ChrX	7.6	W	W	W	NA	W	W	W	W	W	W	W	W	W	W	W	W	W	W	W	W	W	W	W	W	W	W	W	W	W	W	W	W	W	NA	W	W	W	W	W	W	W	W	W	W	W	W	W	W
ChrX	7.7	W	W	W	W	W	W	W	W	W	W	W	W	W	W	W	W	W	W	W	W	W	NA	W	W	W	W	W	W	W	W	W	W	W	W	W	W	W	W	W	W	W	W	W	W	W	W	W	W
ChrX	8.1	W	W	W	W	W	W	NA	W	W	W	W	W	W	NA	NA	W	W	NA	W	W	W	W	W	W	W	W	W	W	W	W	W	W	W	W	W	W	W	W	W	W	W	W	W	W	W	W	W	NA
ChrX	8.2	W	W	W	W	W	W	W	W	W	W	W	W	W	W	W	W	W	W	W	W	W	W	W	W	W	W	W	W	W	W	W	W	W	W	W	W	W	W	W	W	W	W	W	W	W	W	W	W
ChrX	8.3	W	W	W	W	W	W	W	W	W	W	W	W	W	W	W	W	W	W	W	W	W	W	W	W	W	W	W	W	W	W	W	W	W	W	W	W	W	W	W	W	W	W	W	W	W	W	W	W
ChrX	8.4	W	W	W	W	W	W	W	W	W	W	W	W	W	W	W	W	W	W	W	W	W	W	W	W	W	W	W	W	W	W	W	W	W	W	W	W	W	W	W	W	W	W	W	W	W	W	W	W
ChrX	8.5	W	W	W	W	W	W	W	W	W	W	W	W	W	W	W	W	W	W	W	W	W	W	W	W	W	W	W	W	W	W	W	W	W	W	W	W	W	W	W	W	W	W	W	W	W	W	W	W
ChrX	8.6	W	W	W	W	W	W	W	W	W	W	W	W	W	W	W	W	W	W	W	W	W	W	W	W	W	W	W	W	W	W	W	W	W	W	W	W	W	W	W	W	W	W	W	W	W	W	W	W
ChrX	8.7	W	W	W	W	W	W	W	W	W	W	W	W	W	W	NA	W	W	W	W	W	W	W	W	W	W	W	W	W	W	W	W	W	W	W	W	NA	W	W	W	W	W	W	W	W	W	W	W	W
ChrX	8.8	W	W	W	W	W	W	W	W	W	W	W	W	W	W	W	W	W	W	W	W	W	W	W	W	W	W	W	W	W	W	W	W	NA	W	W	W	W	W	W	W	W	W	W	W	W	W	W	W
ChrX	8.9	W	W	W	W	W	W	W	W	W	W	W	W	W	W	W	W	W	W	W	W	W	W	W	W	W	W	W	W	W	W	W	W	W	W	W	W	W	W	W	W	W	W	W	NA	W	W	W	W
ChrX	9	W	W	W	W	W	W	W	W	W	W	NA	W	W	NA	W	W	NA	W	W	W	W	W	W	W	W	W	NA	W	W	W	W	W	W	W	W	W	W	W	W	W	W	W	W	W	W	W	W	W
ChrX	9.1	W	W	W	W	W	W	W	W	W	W	W	W	W	W	W	W	W	W	W	W	W	W	W	W	W	W	W	W	W	W	W	W	W	W	W	W	W	W	W	W	W	W	W	W	W	W	W	W
ChrX	9.2	W	W	W	W	W	W	W	W	W	W	W	W	W	W	W	W	W	W	W	W	W	W	W	W	W	W	W	W	W	W	W	W	W	W	W	W	W	W	W	W	W	W	W	W	W	W	W	W
ChrX	9.3	W	W	W	W	W	W	W	W	W	W	W	W	W	W	W	W	W	W	W	W	W	W	W	W	W	W	W	W	W	W	W	W	W	NA	W	W	W	W	W	W	W	W	W	W	W	W	W	W
ChrX	9.4	NA	W	W	NA	W	W	NA	W	W	W	W	W	W	W	W	W	W	W	W	W	W	W	W	W	W	W	W	W	W	W	W	W	W	W	W	W	W	W	W	W	W	W	W	W	NA	W	W	NA
ChrX	9.5	W	W	W	W	W	W	W	W	W	W	W	W	W	W	W	W	W	W	W	W	W	W	W	W	W	W	W	W	W	W	W	W	W	W	W	W	W	W	W	W	W	W	W	W	W	W	W	W
ChrX	9.6	W	W	W	W	W	W	NA	W	W	W	W	W	W	W	W	W	W	W	W	NA	W	W	W	W	W	W	W	W	W	W	W	W	W	W	W	W	W	W	W	W	W	W	W	W	W	W	W	W
ChrX	9.7	W	W	W	W	W	W	W	W	W	W	W	W	W	W	W	W	W	W	W	W	W	W	W	W	W	W	W	W	W	W	W	W	W	W	W	W	W	W	W	W	W	W	W	W	W	W	W	W
ChrX	9.8	W	W	W	W	W	W	W	W	W	W	W	W	W	W	W	W	W	W	W	W	W	W	W	W	W	W	W	W	W	W	W	W	W	W	W	W	W	W	W	W	W	W	W	W	W	W	W	W
ChrX	9.9	W	W	W	W	W	W	W	NA	W	W	W	W	W	NA	W	W	W	W	W	W	W	W	W	W	W	W	W	W	W	W	W	W	W	W	W	W	W	W	W	W	W	W	W	W	W	W	W	W
ChrX	10	W	W	W	W	W	W	W	W	W	W	W	W	W	W	NA	W	W	W	W	W	W	W	NA	W	W	W	W	W	W	W	W	W	W	W	W	NA	W	W	W	W	W	W	W	W	W	W	W	W
ChrX	10.1	W	W	W	W	W	NA	W	W	W	W	NA	NA	W	W	W	W	W	NA	W	W	W	W	W	W	W	W	W	W	W	W	W	W	W	W	W	W	NA	W	W	NA	W	W	W	W	NA	W	W	W
ChrX	10.2	W	W	W	W	W	W	W	W	W	W	W	W	W	W	W	W	W	W	W	NA	W	W	W	W	W	W	W	W	W	W	W	W	W	W	W	W	W	W	W	W	W	W	W	W	W	W	W	W
ChrX	10.3	W	W	W	W	W	W	W	W	W	W	W	W	W	W	W	W	W	W	W	W	W	W	W	W	W	W	W	W	W	W	W	W	W	W	W	W	W	W	W	W	W	W	W	W	W	W	W	W
ChrX	10.4	W	W	W	W	W	W	W	W	W	W	W	W	W	W	W	W	W	W	W	W	W	W	W	W	W	W	W	W	W	W	W	W	W	W	W	W	W	W	W	W	W	W	W	W	W	W	W	W
ChrX	10.5	W	W	W	W	W	W	W	W	W	W	W	W	W	W	W	W	W	W	W	W	W	W	W	W	W	W	W	W	W	W	W	W	W	W	W	W	W	W	W	W	W	W	W	W	W	W	W	W
ChrX	10.6	W	W	W	W	W	W	W	W	W	W	W	W	W	W	W	W	W	W	W	W	W	W	W	W	W	W	W	W	W	W	W	W	W	W	W	W	W	W	W	W	W	W	W	W	W	NA	W	W
ChrX	10.8	W	W	W	NA	W	W	W	W	W	W	NA	W	NA	NA	W	W	W	W	W	W	W	NA	NA	W	W	NA	W	NA	W	W	W	W	W	W	W	W	W	W	W	W	W	W	W	W	W	NA	W	NA
ChrX	10.9	W	W	W	W	W	W	W	W	W	W	W	W	W	W	NA	W	W	W	W	W	W	W	W	W	W	W	W	W	W	W	W	W	W	W	W	W	W	W	W	W	W	W	W	W	W	W	W	W
ChrX	11	W	W	W	W	W	W	W	W	W	W	W	W	W	NA	W	W	W	W	W	W	W	W	NA	W	W	W	W	W	W	W	W	W	W	W	W	W	W	W	W	W	W	W	W	W	W	W	W	W
ChrX	11.1	W	W	W	NA	W	W	W	W	W	W	W	W	W	NA	NA	W	W	W	W	W	W	W	W	W	W	NA	W	W	W	W	W	W	W	W	W	W	W	W	W	W	W	W	W	W	NA	W	W	W
ChrX	11.2	W	W	W	W	W	W	W	W	W	W	W	W	W	W	W	W	W	W	W	W	W	W	W	W	W	W	W	W	W	W	W	W	W	W	W	W	W	W	W	W	W	W	W	W	W	W	W	W
ChrX	12	W	W	W	W	W	W	W	W	W	W	W	W	W	W	W	W	W	W	W	W	W	W	W	W	W	W	W	W	W	W	W	W	W	W	W	W	W	W	W	W	W	W	W	W	W	W	W	W
ChrX	12.1	W	W	W	W	W	W	W	W	W	W	W	W	W	W	W	W	W	W	W	W	W	W	W	W	W	W	W	W	W	W	W	W	W	W	W	W	W	W	W	W	W	W	W	W	W	W	W	W
ChrX	12.2	W	W	W	W	W	W	W	W	W	W	W	W	W	W	W	W	W	W	W	W	W	W	W	W	W	W	W	W	W	W	W	W	W	W	W	W	W	W	W	W	W	W	W	W	W	W	W	W
ChrX	12.3	W	W	W	W	W	W	W	W	W	W	W	W	W	W	W	W	W	W	W	W	W	W	W	W	W	W	W	W	W	W	W	W	W	W	W	W	W	W	W	W	W	W	W	W	W	W	W	W
ChrX	12.4	W	W	W	W	W	W	NA	W	W	W	W	W	W	W	NA	W	W	W	W	W	W	W	W	W	W	W	W	W	W	W	W	W	W	W	W	W	W	W	W	W	W	W	W	W	W	W	W	W
ChrX	12.6	W	W	W	W	W	W	W	W	W	W	W	W	W	NA	W	W	W	W	W	W	W	W	W	W	W	W	W	W	W	W	W	W	W	W	W	W	W	W	W	W	W	W	W	W	W	W	W	W
ChrX	12.7	W	W	W	W	W	W	W	W	W	W	W	W	W	W	W	W	W	W	W	W	W	W	W	W	W	W	W	W	W	W	W	W	W	W	W	W	W	W	W	W	W	W	W	W	W	W	W	W
ChrX	12.8	W	W	W	W	W	W	W	W	W	W	W	W	W	NA	W	W	W	W	W	W	W	W	W	W	W	W	W	W	W	W	W	W	W	NA	W	W	W	W	W	W	W	W	W	W	W	W	W	W
ChrX	12.9	W	W	W	W	W	W	NA	W	W	W	W	W	W	NA	W	W	W	W	W	W	W	W	W	W	W	W	W	W	W	W	W	W	W	W	W	W	W	W	W	W	W	W	W	W	W	W	W	W
ChrX	13	W	W	W	W	W	W	W	W	W	W	W	W	W	NA	NA	W	W	W	W	W	W	W	W	W	W	W	W	W	W	W	W	W	W	W	W	W	W	W	W	W	W	W	W	W	NA	NA	W	NA
ChrX	13.1	W	W	W	W	W	W	W	W	W	W	W	W	W	W	W	W	W	W	W	W	W	W	NA	W	W	W	W	W	W	W	W	W	W	W	W	NA	W	W	W	W	W	W	W	W	W	W	W	W
ChrX	13.2	W	W	W	W	W	W	W	W	W	W	W	W	W	NA	W	W	W	W	W	W	W	W	W	W	W	W	W	W	W	W	W	W	W	W	W	W	W	W	W	W	W	W	W	W	W	W	W	W
ChrX	13.3	W	W	W	W	W	W	W	W	W	W	W	W	W	W	W	W	W	W	W	W	W	W	W	W	W	W	W	W	W	W	W	W	W	W	W	W	W	W	W	W	W	W	W	W	W	W	W	W
ChrX	13.4	W	W	W	W	W	W	W	W	W	W	W	W	W	W	W	W	W	NA	W	W	W	W	NA	W	W	W	W	W	W	W	W	W	W	NA	W	W	W	W	W	W	W	W	W	W	W	NA	W	W
ChrX	13.5	W	W	W	NA	W	W	W	W	W	W	W	W	NA	NA	NA	W	W	W	W	W	W	NA	W	W	W	W	W	W	W	NA	W	W	W	W	W	NA	NA	W	W	NA	W	W	W	W	W	NA	W	W
ChrX	13.6	W	W	W	W	W	W	W	W	W	W	W	W	W	NA	W	W	W	W	W	W	W	W	W	W	NA	W	W	W	W	W	W	W	W	W	W	W	W	W	W	W	W	W	W	W	W	W	W	NA
ChrX	13.7	NA	W	W	NA	W	NA	NA	W	NA	W	NA	NA	W	W	NA	W	W	W	W	W	W	NA	NA	W	W	W	W	W	W	NA	W	W	W	W	W	NA	NA	W	W	NA	W	W	W	W	W	NA	W	W
ChrX	14.2	W	W	W	W	W	W	W	W	W	W	W	W	W	W	W	W	W	W	W	W	W	W	W	W	W	W	W	W	W	W	W	W	W	W	W	W	W	W	W	W	W	W	W	W	W	W	W	W
ChrX	14.3	W	W	W	W	W	W	W	W	W	W	W	W	W	W	W	W	W	W	W	W	W	W	W	W	W	W	W	W	W	W	W	W	W	W	W	W	W	W	W	W	W	W	W	W	W	W	W	W
ChrX	14.4	W	W	W	W	W	W	W	W	W	W	W	W	W	W	W	W	W	W	W	W	W	W	W	W	W	W	W	W	W	W	W	W	W	W	W	W	W	W	W	W	W	W	W	W	W	W	W	W
ChrX	14.5	W	W	W	W	W	W	W	W	W	W	W	W	W	W	NA	W	W	W	W	W	W	W	W	W	W	W	W	W	W	W	W	W	W	W	W	W	W	W	W	W	W	W	W	W	W	W	W	W
ChrX	14.6	W	W	W	W	W	W	W	W	W	W	W	W	W	W	W	W	W	W	W	W	W	W	W	W	W	W	W	W	W	W	W	W	W	W	W	W	W	W	W	W	W	W	W	W	W	W	W	W
ChrX	14.7	W	W	W	W	W	W	W	W	W	W	W	W	W	W	W	W	W	W	W	W	W	W	W	W	W	W	W	W	W	W	W	W	W	W	W	W	W	W	W	W	W	W	W	W	W	W	W	W
ChrX	14.8	W	W	W	W	W	W	W	W	W	W	W	W	W	W	W	W	W	W	W	W	W	W	W	W	W	W	W	W	W	W	W	W	W	W	W	W	W	W	W	W	W	W	W	W	W	W	W	W
ChrX	14.9	W	W	W	W	W	W	W	W	W	W	W	W	W	W	W	W	W	W	W	W	W	W	W	W	W	W	W	W	W	W	W	W	W	NA	W	W	W	W	W	W	W	W	W	W	W	NA	W	W
ChrX	15	W	W	W	W	W	W	W	W	W	W	W	W	W	W	W	W	W	W	W	W	W	W	W	W	W	W	W	W	W	W	W	W	W	W	W	W	W	W	W	W	W	W	W	W	W	W	W	W
ChrX	15.1	W	W	W	W	W	W	W	W	W	W	W	W	W	W	W	W	W	W	W	W	W	W	W	W	W	W	W	W	W	W	W	W	W	W	W	W	W	W	W	W	W	W	W	W	W	W	W	W
ChrX	15.2	W	W	W	W	W	W	W	W	W	W	W	W	W	W	W	W	W	W	W	W	W	W	W	W	W	W	W	W	W	W	W	W	W	W	W	W	W	W	W	W	W	W	W	W	W	W	W	W
ChrX	15.3	W	W	W	W	W	W	W	W	W	W	W	W	W	W	W	W	W	W	W	W	W	W	W	W	W	W	W	W	W	W	W	W	W	W	W	W	W	W	W	W	W	W	W	W	W	W	W	W
ChrX	15.4	W	W	W	W	W	W	W	W	W	W	W	W	W	NA	NA	W	W	W	W	W	W	W	W	W	W	W	W	W	W	W	W	W	W	W	W	W	W	W	W	W	W	W	W	W	W	W	W	W
[truncated: 44 more columns]

## Sheet: Map_position
CHR	MB	cM	map
ChrI	0.1	0	XO
ChrI	0.8	1.09808	XO
ChrI	1.3	3.81987	XO
ChrI	1.5	6.54167	XO
ChrI	2.5	7.62875	XO
ChrI	2.8	11.274	XO
ChrI	2.9	13.0723	XO
ChrI	3.4	15.2476	XO
ChrI	3.9	16.3347	XO
ChrI	4.1	18.51	XO
ChrI	5	21.7755	XO
ChrI	8.3	25.041	XO
ChrI	9	26.1281	XO
ChrI	9.3	27.2153	XO
ChrI	13.3	28.3024	XO
ChrI	21.7	29.3895	XO
ChrI	25	30.4766	XO
ChrI	30.4	31.5638	XO
ChrI	31.8	32.6509	XO
ChrI	32.5	33.738	XO
ChrI	32.9	34.8255	XO
ChrI	33	35.9131	XO
ChrI	34.6	38.0883	XO
ChrI	34.7	40.2696	XO
ChrI	35	42.4508	XO
ChrI	35.3	44.631	XO
ChrI	35.5	47.9015	XO
ChrI	35.8	48.9892	XO
ChrI	36.1	50.077	XO
ChrI	36.3	51.1641	XO
ChrI	37.7	53.3394	XO
ChrI	37.9	54.4267	XO
ChrI	38.1	55.5139	XO
ChrI	38.6	56.6001	XO
ChrII	0.1	0	XO
ChrII	1.5	1.09823	XO
ChrII	2.7	2.18548	XO
ChrII	3.5	4.36132	XO
ChrII	3.7	5.44935	XO
ChrII	4.2	8.7153	XO
ChrII	5.2	10.8908	XO
ChrII	6.4	11.9782	XO
ChrII	6.7	13.0655	XO
ChrII	7.1	14.1527	XO
ChrII	9.3	16.328	XO
ChrII	14.6	17.4151	XO
ChrII	16.6	20.6807	XO
ChrII	17	22.8559	XO
ChrII	17.4	25.7634	XO
ChrII	17.5	27.2094	XO
ChrII	17.8	28.2969	XO
ChrII	18.2	29.9283	XO
ChrII	18.4	31.5601	XO
ChrII	18.7	32.6476	XO
ChrII	19.1	33.7348	XO
ChrII	19.3	37.0041	XO
ChrII	19.4	38.0932	XO
ChrII	20.5	44.6559	XO
ChrII	20.7	46.8354	XO
ChrII	21.4	49.0153	XO
ChrII	22.1	50.1017	XO
ChrIII	0.4	0	XO
ChrIII	4.5	1.08615	XO
ChrIII	9.4	2.17328	XO
ChrIII	13.8	3.26037	XO
ChrIII	14.1	7.62098	XO
ChrIII	14.8	10.8882	XO
ChrIII	15	11.9754	XO
ChrIII	15.1	13.0626	XO
ChrIII	15.3	15.2387	XO
ChrIII	15.5	18.5051	XO
ChrIII	16.4	19.5922	XO
ChrIII	16.5	21.7674	XO
ChrIII	16.7	27.2252	XO
ChrIII	16.9	28.3136	XO
ChrIII	17.4	34.878	XO
ChrIII	18	38.1486	XO
ChrIII	18.7	48.4991	XO
ChrIII	18.9	51.3478	XO
ChrIII	20	53.523	XO
ChrIII	20.1	53.5231	XO
ChrIII	20.7	54.6092	XO
ChrIV	0.4	0	XO
ChrIV	1.1	1.08641	XO
ChrIV	6.8	2.1738	XO
ChrIV	13.3	3.26093	XO
ChrIV	13.9	4.34806	XO
ChrIV	20.5	5.43532	XO
ChrIV	20.8	6.52258	XO
ChrIV	22.8	7.60968	XO
ChrIV	22.9	8.69733	XO
ChrIV	23.2	10.8732	XO
ChrIV	23.4	11.9603	XO
ChrIV	23.6	13.0478	XO
ChrIV	23.8	16.3137	XO
ChrIV	24.7	20.2391	XO
ChrIV	25	22.8459	XO
ChrIV	25.4	24.2924	XO
ChrIV	26.2	27.2003	XO
ChrIV	26.5	29.3756	XO
ChrIV	26.6	30.4627	XO
ChrIV	27	32.0755	XO
ChrIV	27.8	37.0046	XO
ChrIV	28	38.0917	XO
ChrIV	28.6	41.3572	XO
ChrIV	29.3	45.7151	XO
ChrV	0	0	XO
ChrV	0.7	2.17433	XO
ChrV	1.4	4.35206	XO
ChrV	2.6	7.62294	XO
ChrV	2.8	11.4378	XO
ChrV	3.2	11.4378	XO
ChrV	4.1	15.2527	XO
ChrV	3.9	15.2527	XO
ChrV	4.6	18.5239	XO
ChrV	5.9	19.6166	XO
ChrV	6.7	20.7044	XO
ChrV	7.2	21.7915	XO
ChrV	18.5	22.879	XO
ChrV	18.9	26.1453	XO
ChrV	19.1	27.2335	XO
ChrV	19.4	29.4096	XO
ChrV	20.1	30.4974	XO
ChrV	20.3	32.6751	XO
ChrV	20.5	37.0379	XO
ChrV	20.9	38.1266	XO
ChrV	21.2	40.3018	XO
ChrV	21.3	40.3019	XO
ChrV	21.6	44.6608	XO
ChrV	21.9	45.7492	XO
ChrV	22.1	47.9258	XO
ChrV	22.8	50.1001	XO
ChrI	0.8	0	XX
ChrI	1.5	2.17434	XX
ChrI	2	3.26144	XX
ChrI	2.5	5.43675	XX
ChrI	2.7	6.52426	XX
ChrI	2.9	7.61174	XX
ChrI	3.7	13.0689	XX
ChrI	3.9	14.1566	XX
ChrI	5	15.2438	XX
ChrI	5.2	17.4191	XX
ChrI	5.8	18.5062	XX
ChrI	6	19.5938	XX
ChrI	6.3	20.6815	XX
ChrI	6.7	22.8578	XX
ChrI	7.7	25.0337	XX
ChrI	8.3	26.1208	XX
ChrI	9.3	27.2079	XX
ChrI	13.3	28.2951	XX
ChrI	21.5	29.3822	XX
ChrI	27	30.4694	XX
ChrI	27.5	31.5589	XX
ChrI	29.2	32.6483	XX
ChrI	30.7	34.8236	XX
ChrI	31.8	35.9107	XX
ChrI	32.8	38.8207	XX
ChrI	33	40.2699	XX
ChrI	33.3	41.357	XX
ChrI	33.5	42.4441	XX
ChrI	33.8	43.5313	XX
ChrI	34.2	44.6184	XX
ChrI	34.6	46.7937	XX
ChrI	34.8	48.97	XX
ChrI	35	50.0582	XX
ChrI	35.8	52.2351	XX
ChrI	36.1	54.412	XX
ChrI	37.7	55.4982	XX
ChrII	0.1	0	XX
ChrII	1.9	4.14002	XX
ChrII	2.7	5.48981	XX
ChrII	4.9	7.66713	XX
ChrII	5.2	10.3895	XX
ChrII	6.4	13.1093	XX
ChrII	7.1	14.1964	XX
ChrII	9.3	15.2835	XX
ChrII	16.6	19.6424	XX
ChrII	17	21.8177	XX
ChrII	17.5	23.993	XX
ChrII	19.1	25.0801	XX
ChrII	19.4	30.5401	XX
ChrII	19.6	36.0058	XX
ChrII	20.5	40.3704	XX
ChrII	20.7	43.6357	XX
ChrII	21.4	43.6359	XX
ChrII	22.1	46.9014	XX
ChrII	22.3	49.0757	XX
ChrIII	0.4	0	XX
ChrIII	0.8	1.08641	XX
ChrIII	1.4	2.1742	XX
ChrIII	2	3.26171	XX
ChrIII	2.3	5.43808	XX
ChrIII	2.5	6.52653	XX
ChrIII	3.1	7.61392	XX
ChrIII	3.3	8.70102	XX
ChrIII	3.6	11.9666	XX
ChrIII	4	14.1424	XX
ChrIII	4.3	15.2306	XX
ChrIII	4.5	16.3182	XX
ChrIII	5	18.4935	XX
ChrIII	5.4	20.6688	XX
ChrIII	5.9	22.8441	XX
ChrIII	6.7	25.0194	XX
ChrIII	7.3	26.1065	XX
ChrIII	14.1	27.1937	XX
ChrIII	14.3	28.2813	XX
ChrIII	14.7	30.4571	XX
ChrIII	14.8	31.5445	XX
ChrIII	15.5	32.6316	XX
ChrIII	16.3	34.8069	XX
ChrIII	16.9	35.894	XX
ChrIII	18	36.9811	XX
ChrIII	18.2	40.2504	XX
ChrIII	18.9	43.5196	XX
ChrIII	20	47.879	XX
ChrIII	20.1	48.9667	XX
ChrIII	20.8	50.0528	XX
ChrIV	0.4	0	XX
ChrIV	0.7	4.35795	XX
ChrIV	1.2	5.44625	XX
ChrIV	2.4	7.62477	XX
ChrIV	2.5	8.87419	XX
ChrIV	3	15.1642	XX
ChrIV	3.6	16.4287	XX
ChrIV	4	17.5181	XX
ChrIV	4.4	19.151	XX
ChrIV	4.6	20.7898	XX
ChrIV	4.8	22.9687	XX
ChrIV	5.7	25.1592	XX
ChrIV	6.8	28.4372	XX
ChrIV	9.9	29.5243	XX
ChrIV	13.3	30.6114	XX
ChrIV	16.9	31.6985	XX
ChrIV	20.2	32.7857	XX
ChrIV	22.8	33.8728	XX
ChrIV	23.2	34.9599	XX
ChrIV	23.8	36.047	XX
ChrIV	24.7	37.1343	XX
ChrIV	25	38.2216	XX
ChrIV	25.8	39.8541	XX
ChrIV	26.2	41.4866	XX
ChrIV	26.5	43.6619	XX
ChrIV	27.8	44.748	XX
ChrV	0	0	XX
ChrV	0.7	1.08614	XX
ChrV	1.4	3.26332	XX
ChrV	2.6	5.8051	XX
ChrV	2.8	8.3468	XX
ChrV	3.2	9.61503	XX
ChrV	4.1	10.8832	XX
ChrV	4.4	14.5637	XX
ChrV	4.9	18.6833	XX
ChrV	6.7	20.7075	XX
ChrV	7.2	21.7946	XX
ChrV	14.7	22.8817	XX
ChrV	14.9	23.9689	XX
ChrV	15.5	26.1442	XX
ChrV	16.4	27.2315	XX
ChrV	17.2	29.4074	XX
ChrV	17.4	30.4948	XX
ChrV	18.6	31.5821	XX
ChrV	18.7	33.7261	XX
ChrV	18.9	38.1195	XX
ChrV	20.1	39.2081	XX
ChrV	20.4	40.4768	XX
ChrV	20.5	41.7454	XX
ChrV	20.9	46.8493	XX
ChrV	22.4	49.0246	XX
ChrV	23.5	50.1227	XX
ChrX	0.5	0	XX
ChrX	1.6	8.78417	XX
ChrX	2.3	10.9593	XX
ChrX	2.5	10.9593	XX
ChrX	2.8	20.8697	XX
ChrX	4.5	36.5852	XX
ChrX	5.5	38.7603	XX
ChrX	6.3	40.9356	XX
ChrX	7.3	42.0227	XX
ChrX	7.5	44.198	XX
ChrX	8.2	45.2851	XX
ChrX	9.1	49.6431	XX
