# Supplementary material for: Analysis of meiosis in Pristionchus pacificus reveals plasticity in homolog pairing and synapsis in the nematode lineage
Source: eLife journal article supplement (doi:10.7554/elife.70990), 2021-08-24
Supplement: supp [file elife-70990-supp-v1.zip]

Figure 3- figure supplement 1

| Genotype                                                                          | % Egg viability<br>(±SD) | % Male progeny<br>(±SD) | Eggs laid<br>(± SD) |
|-----------------------------------------------------------------------------------|--------------------------|-------------------------|---------------------|
| <b>WT</b> (n=30)                                                                  | 92.9 (±16.3)             | 0.9 (±1.0)              | 205 (±55)           |
| <b><i>syp-4::HA</i></b> (n=7)                                                     | 97.7 (±11.0)             | 0.5 (±0.6)              | 164 (±15)           |
| <b><i>dmc-1::V5</i></b> (n=8)                                                     | 95.3 (±4.7)              | 1.1 (±1.4)              | 170 (±14)           |
| <b><i>rad-51::V5</i></b> (n=8)                                                    | 107.1 (±18.9)            | 1.1 (±1.5)              | 157(±15)            |
| <b><i>syp-4::HA</i>;<br/><i>dmc-1::V5</i>;<br/><i>cosa-1::3xFLAG</i></b><br>(n=8) | 87.0 (±10.6)             | 0.4 (±0.6)              | 170 (±37)           |
