# Supplementary material for: Analysis of meiosis in Pristionchus pacificus reveals plasticity in homolog pairing and synapsis in the nematode lineage
Source: eLife. 2021 Aug 24;10:e70990. doi: 10.7554/eLife.70990 (PMC8455136; doi:10.7554/eLife.70990)
Supplement: Supplementary file 2. [file elife-70990-supp2.xlsx]

## Sheet: Sheet1
Species	Accession	Version	Source
Acanthocheilonema viteae	PRJEB1697	WBPS15	WormBase ParaSite
Acrobeloides nanus	PRJEB26554	WBPS15	WormBase ParaSite
Ancylostoma ceylanicum	PRJNA231479	WBPS15	WormBase ParaSite
Ancylostoma duodenale	PRJNA72581	WBPS15	WormBase ParaSite
Angiostrongylus cantonensis	PRJNA350391	WBPS15	WormBase ParaSite
Angiostrongylus costaricensis	PRJEB494	WBPS15	WormBase ParaSite
Anisakis simplex	PRJEB496	WBPS15	WormBase ParaSite
Ascaris suum	PRJNA62057	WBPS15	WormBase ParaSite
Brugia malayi	PRJNA10729	WBPS15	WormBase ParaSite
Brugia pahangi	PRJEB497	WBPS15	WormBase ParaSite
Bursaphelenchus xylophilus	PRJEA64437	WBPS15	WormBase ParaSite
Caenorhabditis elegans	PRJNA13758	WBPS15	WormBase ParaSite
Caenorhabditis parvicauda	PRJEB12595	WBPS15	WormBase ParaSite
Cylicostephanus goldi	PRJEB498	WBPS15	WormBase ParaSite
Dictyocaulus viviparus	PRJNA72587	WBPS15	WormBase ParaSite
Diploscapter coronatus	PRJDB3143	WBPS15	WormBase ParaSite
Diploscapter pachys	PRJNA280107	WBPS15	WormBase ParaSite
Dirofilaria immitis	PRJEB1797	WBPS15	WormBase ParaSite
Ditylenchus destructor	PRJNA312427	WBPS15	WormBase ParaSite
Ditylenchus dipsaci	PRJNA498219	WBPS15	WormBase ParaSite
Dracunculus medinensis	PRJEB500	WBPS15	WormBase ParaSite
Enterobius vermicularis	PRJEB503	WBPS15	WormBase ParaSite
Globodera pallida	PRJEB123	WBPS15	WormBase ParaSite
Gongylonema pulchrum	PRJEB505	WBPS15	WormBase ParaSite
Haemonchus contortus	PRJEB506	WBPS15	WormBase ParaSite
Haemonchus placei	PRJEB509	WBPS15	WormBase ParaSite
Halicephalobus mephisto	PRJNA528747	WBPS15	WormBase ParaSite
Heligmosomoides polygyrus	PRJEB15396	WBPS15	WormBase ParaSite
Heterorhabditis bacteriophora	PRJNA13977	WBPS15	WormBase ParaSite
Hypsibius dujardini	-	3.1.5	tardigrades.org
Litomosoides sigmodontis	PRJEB3075	WBPS15	WormBase ParaSite
Loa loa	PRJNA246086	WBPS15	WormBase ParaSite
Meloidogyne incognita	PRJNA340324	WBPS15	WormBase ParaSite
Meloidogyne javanica	PRJNA340324	WBPS15	WormBase ParaSite
Mesorhabditis belari	PRJEB30104	WBPS15	WormBase ParaSite
Micoletzkya japonica	PRJEB27334	WBPS15	WormBase ParaSite
Necator americanus	PRJNA72135	WBPS15	WormBase ParaSite
Nippostrongylus brasiliensis	PRJEB511	WBPS15	WormBase ParaSite
Oesophagostomum dentatum	PRJNA72579	WBPS15	WormBase ParaSite
Onchocerca ochengi	PRJEB1204	WBPS15	WormBase ParaSite
Onchocerca volvulus	PRJEB513	WBPS15	WormBase ParaSite
Oscheius tipulae	PRJEB15512	WBPS15	WormBase ParaSite
Panagrellus redivivus	PRJNA186477	WBPS15	WormBase ParaSite
Panagrolaimus davidi	PRJEB32708	WBPS15	WormBase ParaSite
Panagrolaimus superbus	PRJEB32708	WBPS15	WormBase ParaSite
Parapristionchus giblindavisi	PRJEB27334	WBPS15	WormBase ParaSite
Parascaris univalens	PRJNA386823	WBPS15	WormBase ParaSite
Parastrongyloides trichosuri	PRJEB515	WBPS15	WormBase ParaSite
Plectus sambesii	PRJNA390260	WBPS15	WormBase ParaSite
Pristionchus entomophagus	PRJEB27334	WBPS15	WormBase ParaSite
Pristionchus exspectatus	PRJEB24288	WBPS15	WormBase ParaSite
Ramazzottius varieornatus	-	Rv101	tardigrades.org
Rhabditophanes kr3021	PRJEB1297	WBPS15	WormBase ParaSite
Romanomermis culicivorax	PRJEB1358	WBPS15	WormBase ParaSite
Setaria digitata	PRJNA479729	WBPS15	WormBase ParaSite
Soboliphyme baturini	PRJEB516	WBPS15	WormBase ParaSite
Steinernema carpocapsae	PRJNA202318	WBPS15	WormBase ParaSite
Steinernema feltiae	PRJNA204661	WBPS15	WormBase ParaSite
Strongyloides ratti	PRJEB125	WBPS15	WormBase ParaSite
Strongyloides stercoralis	PRJEB528	WBPS15	WormBase ParaSite
Strongylus vulgaris	PRJEB531	WBPS15	WormBase ParaSite
Thelazia callipaeda	PRJEB1205	WBPS15	WormBase ParaSite
Toxocara canis	PRJNA248777	WBPS15	WormBase ParaSite
Trichinella pseudospiralis	PRJNA257433	WBPS15	WormBase ParaSite
Trichinella spiralis	PRJNA12603	WBPS15	WormBase ParaSite
Trichuris muris	PRJEB126	WBPS15	WormBase ParaSite
Trichuris suis	PRJNA179528	WBPS15	WormBase ParaSite
Wuchereria bancrofti	PRJNA275548	WBPS15	WormBase ParaSite
