# Supplementary figures and images for: Analysis of meiosis in Pristionchus pacificus reveals plasticity in homolog pairing and synapsis in the nematode lineage
Source: eLife journal article supplement (doi:10.7554/elife.70990), 2021-08-24

Figure 6- figure supplement 1

**A**

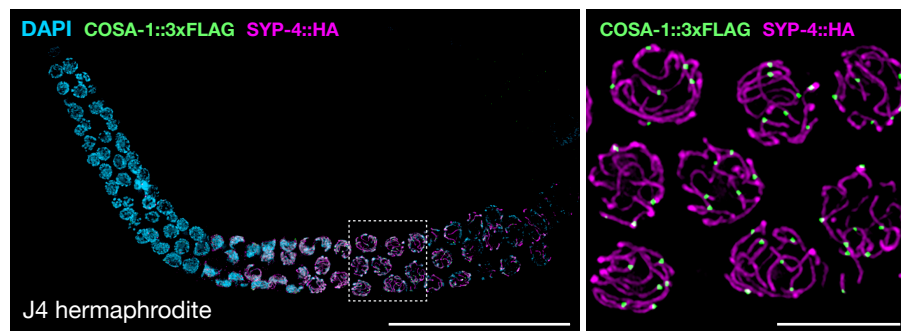

Supplement: supp [file elife-70990-supp-v1.zip]

# COSA-1

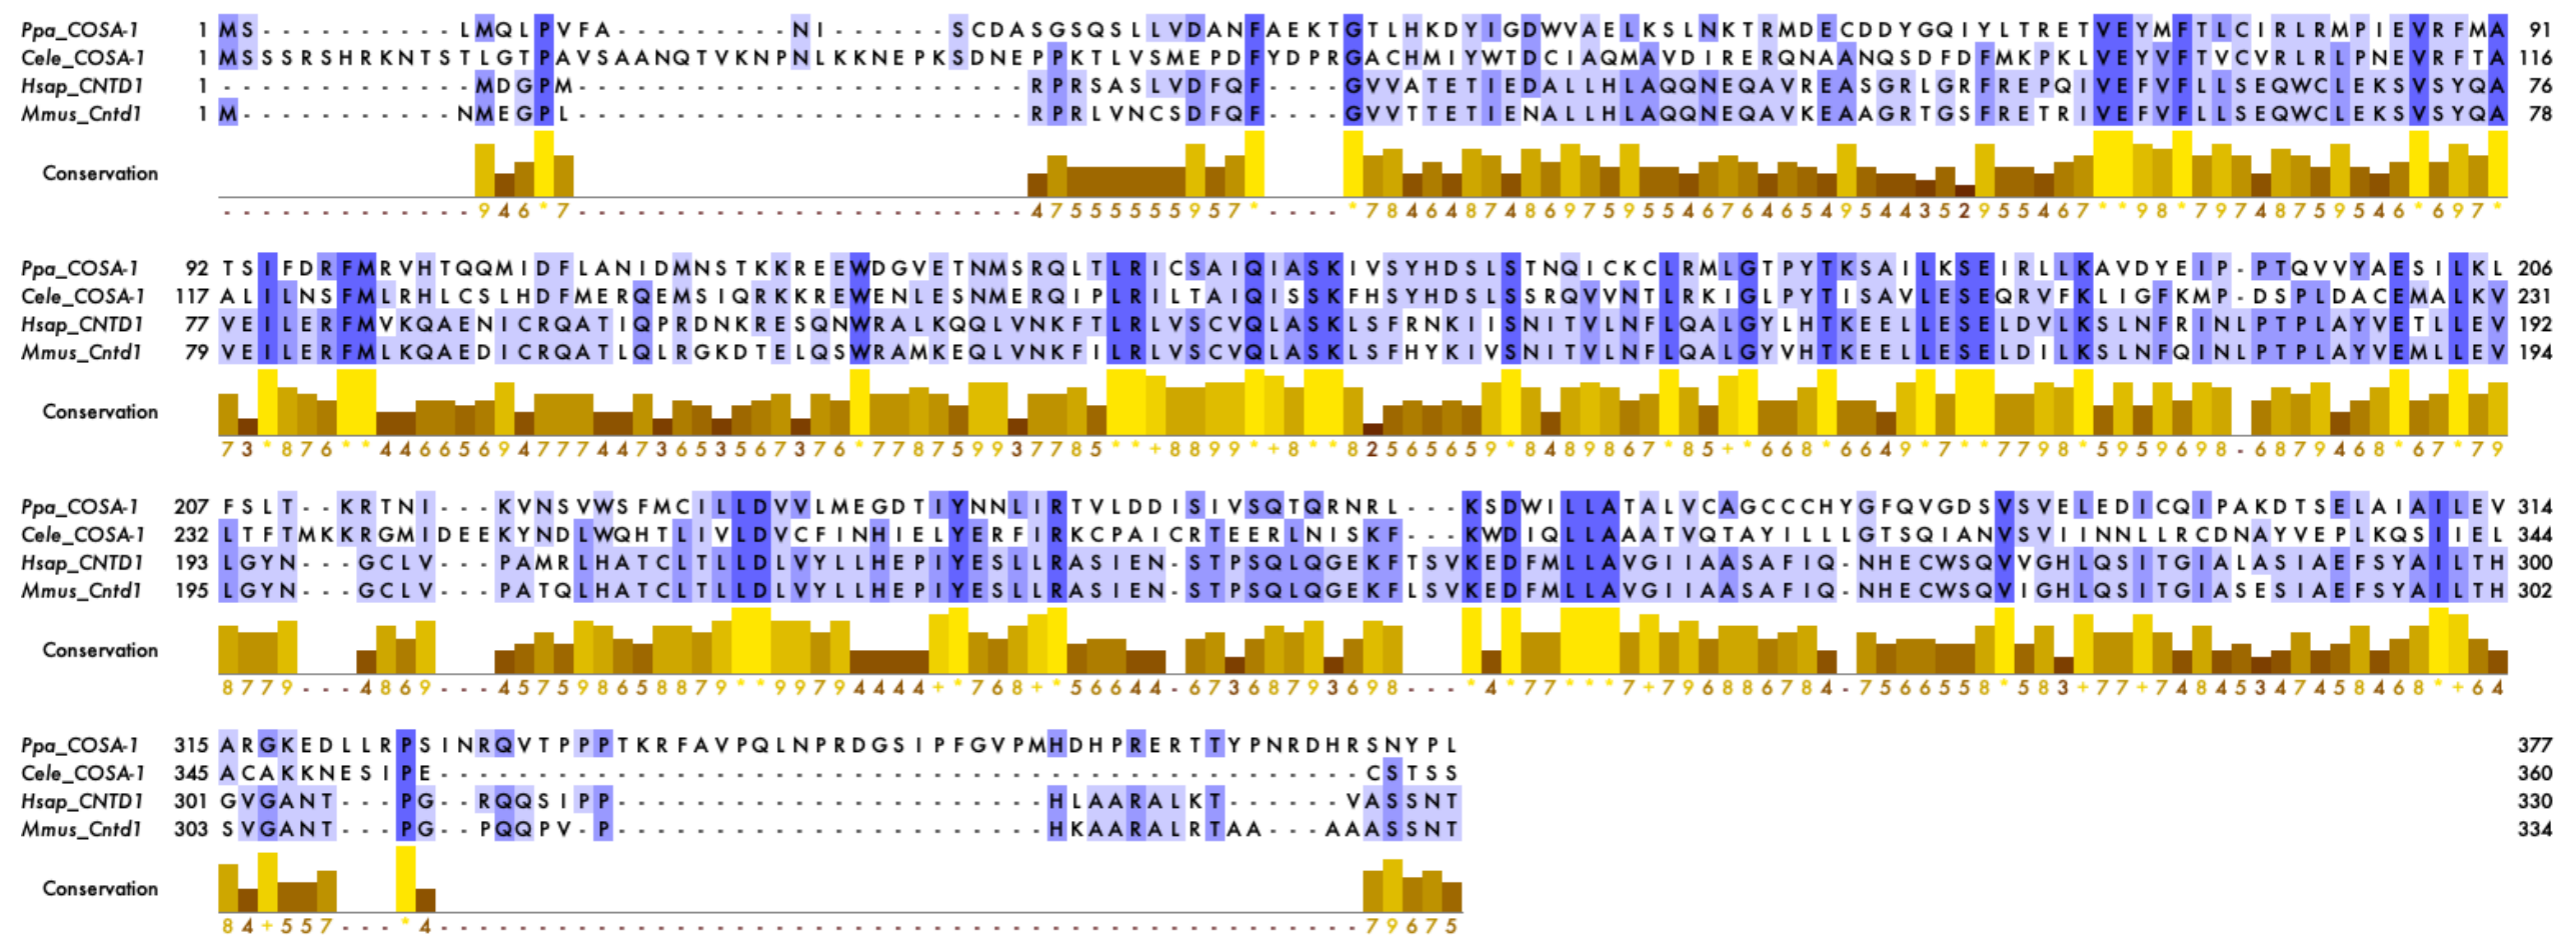

Supplement: supp [file elife-70990-supp-v1.zip]

Figure 1 - figure supplement 3

DMC-1

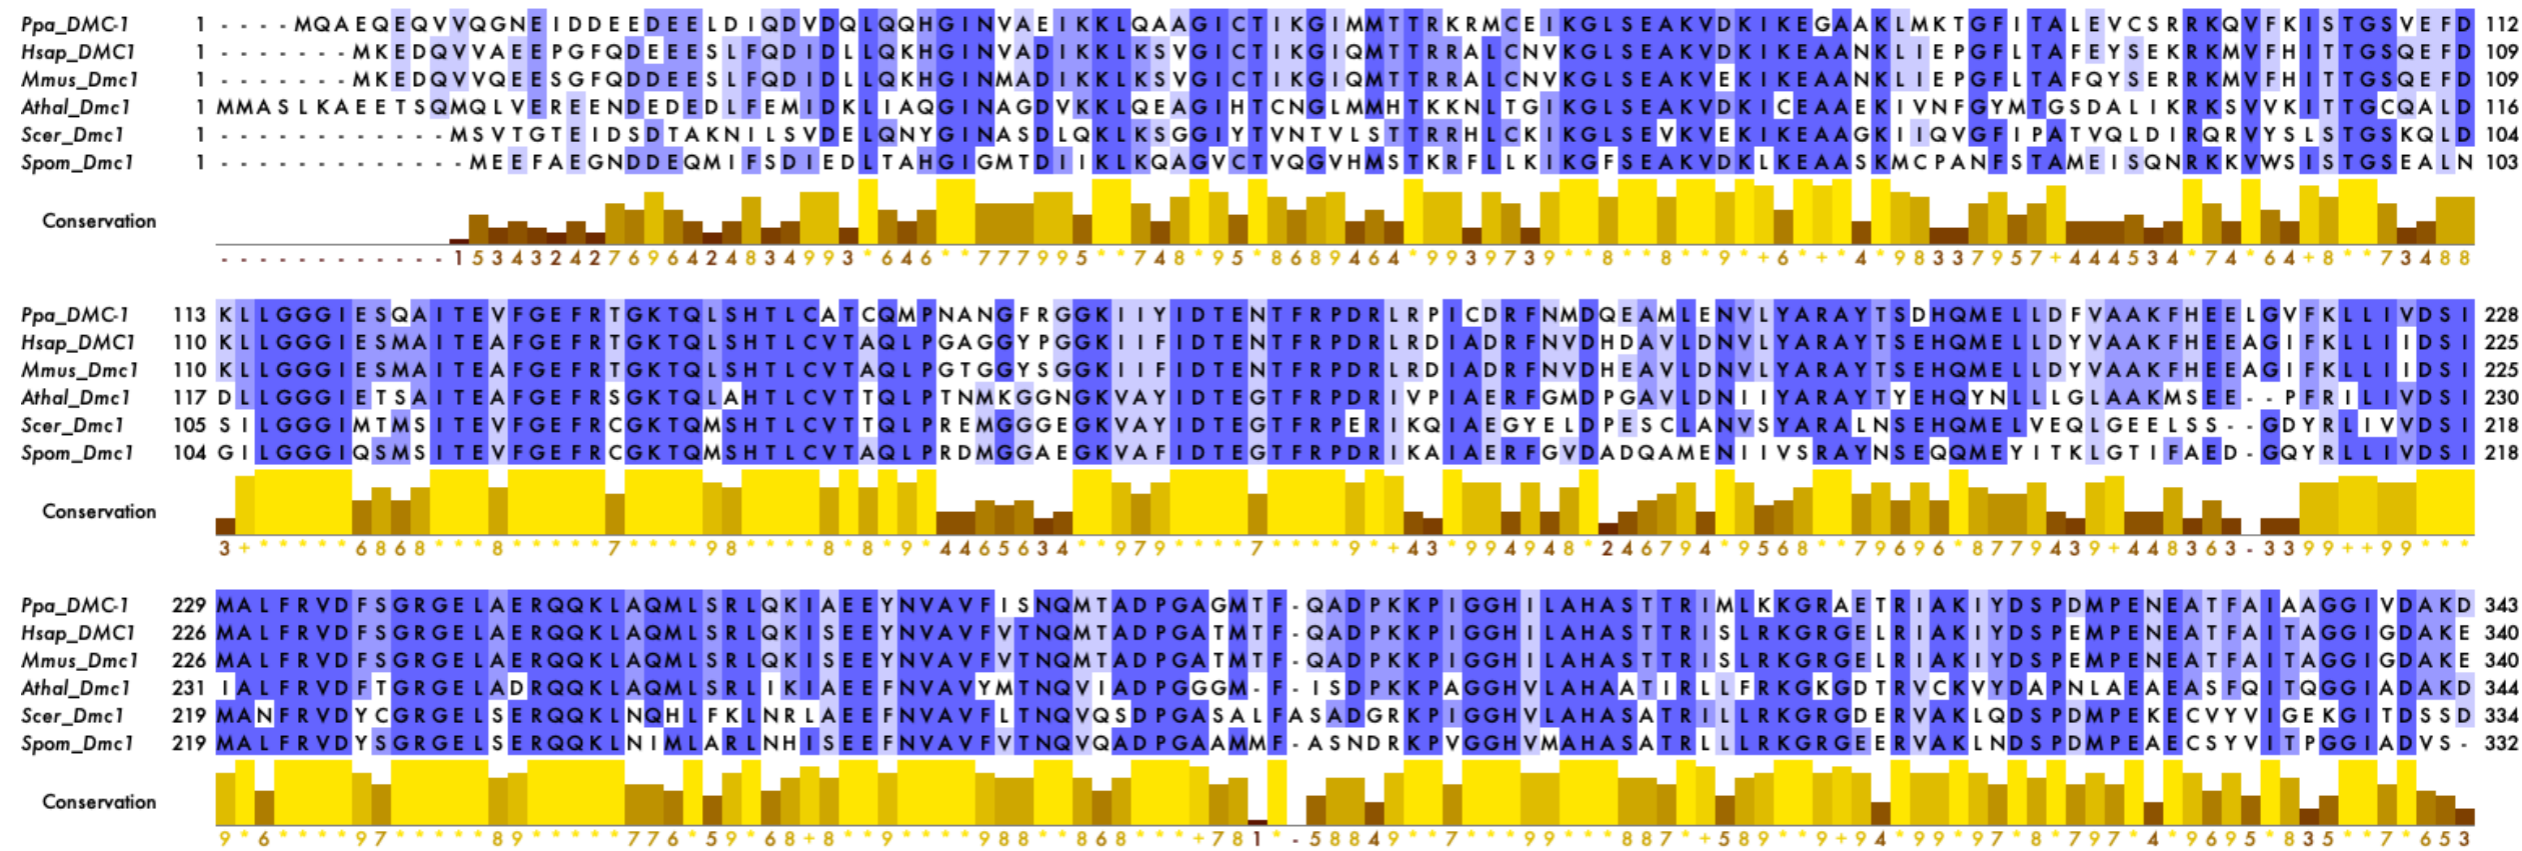

Supplement: supp [file elife-70990-supp-v1.zip]

Figure 8 - figure supplement 1

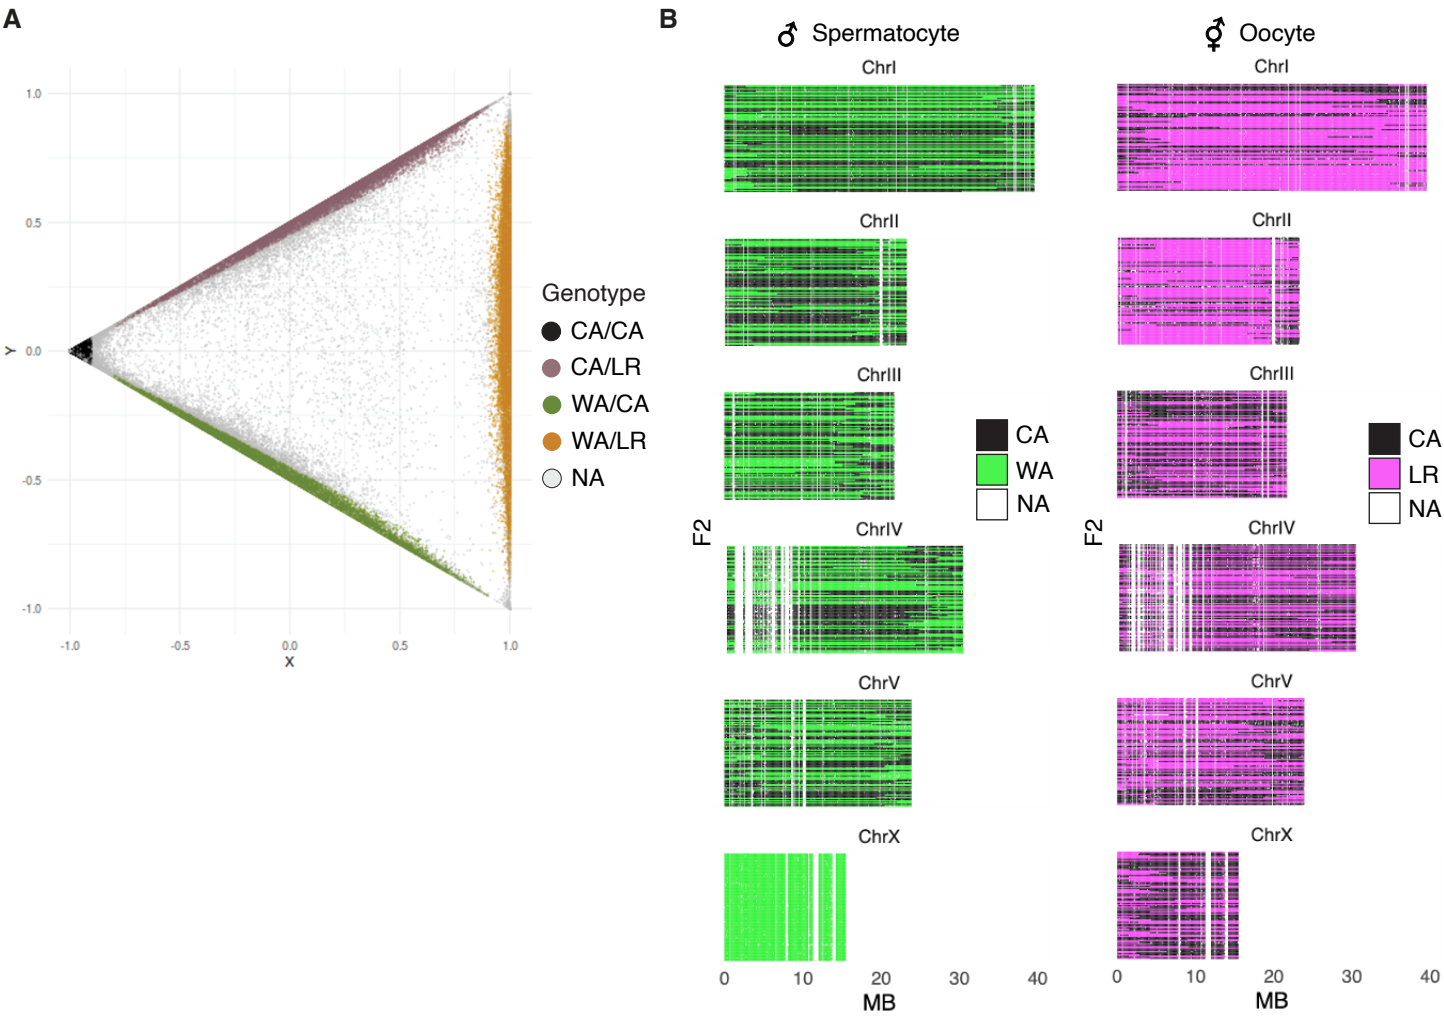

Supplement: supp [file elife-70990-supp-v1.zip]

Figure 1 - figure supplement 4

MND-1

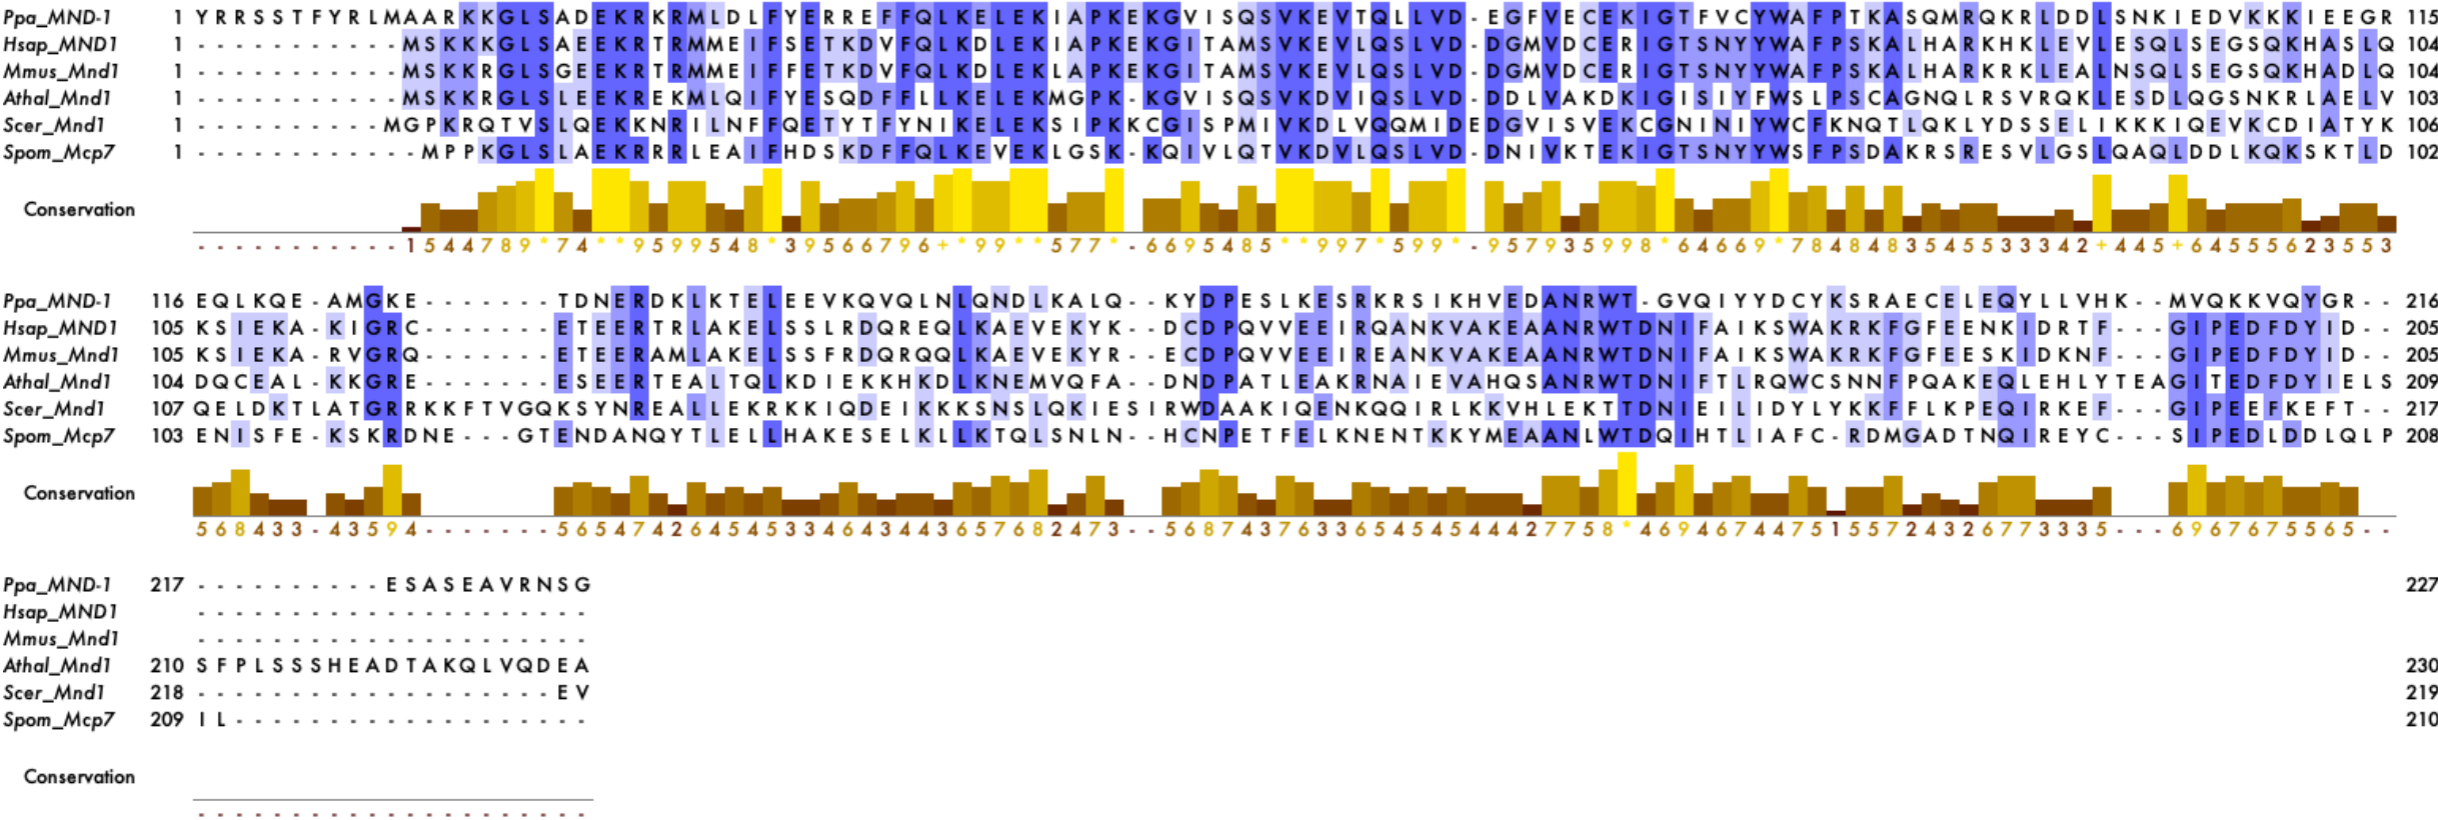

Supplement: supp [file elife-70990-supp-v1.zip]

SPO-11

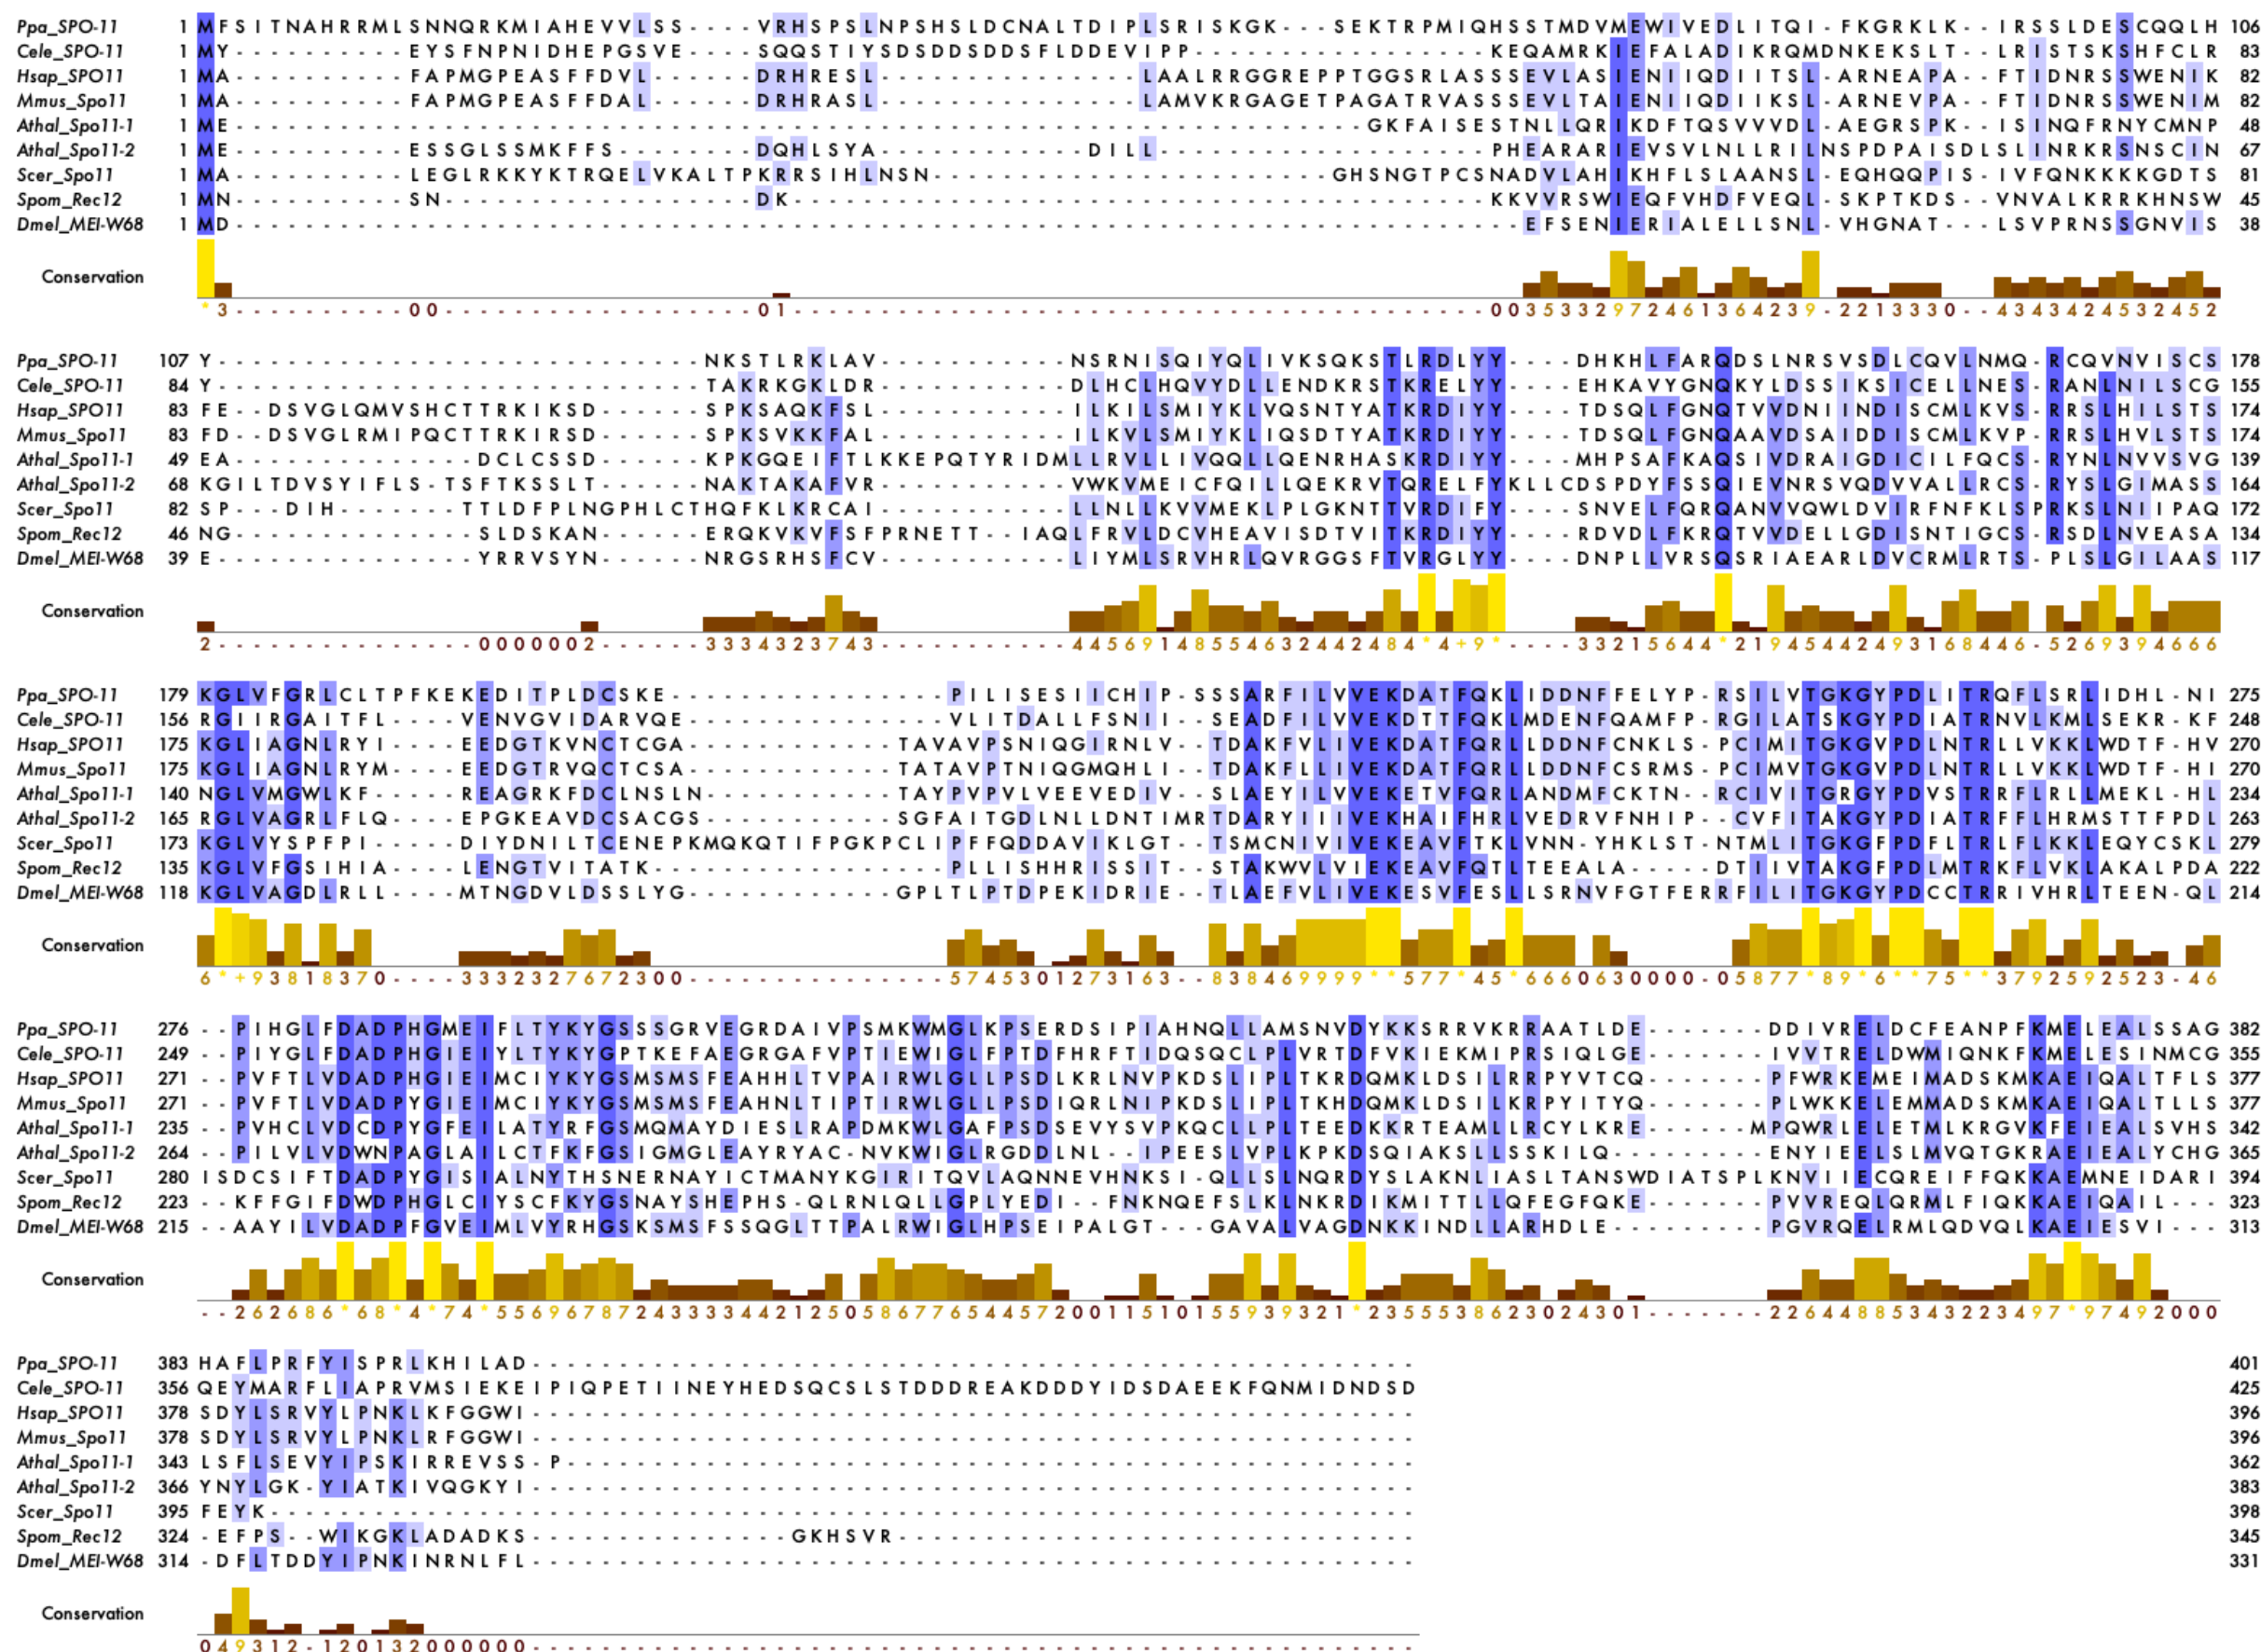

Supplement: supp [file elife-70990-supp-v1.zip]

Figure 6- figure supplement 2

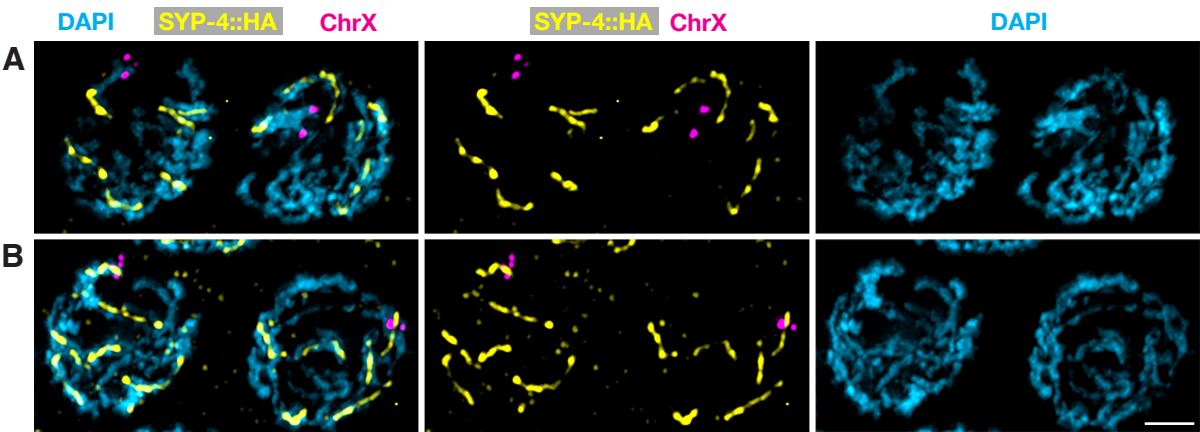

Supplement: supp [file elife-70990-supp-v1.zip]

Figure 4 - figure supplement 2

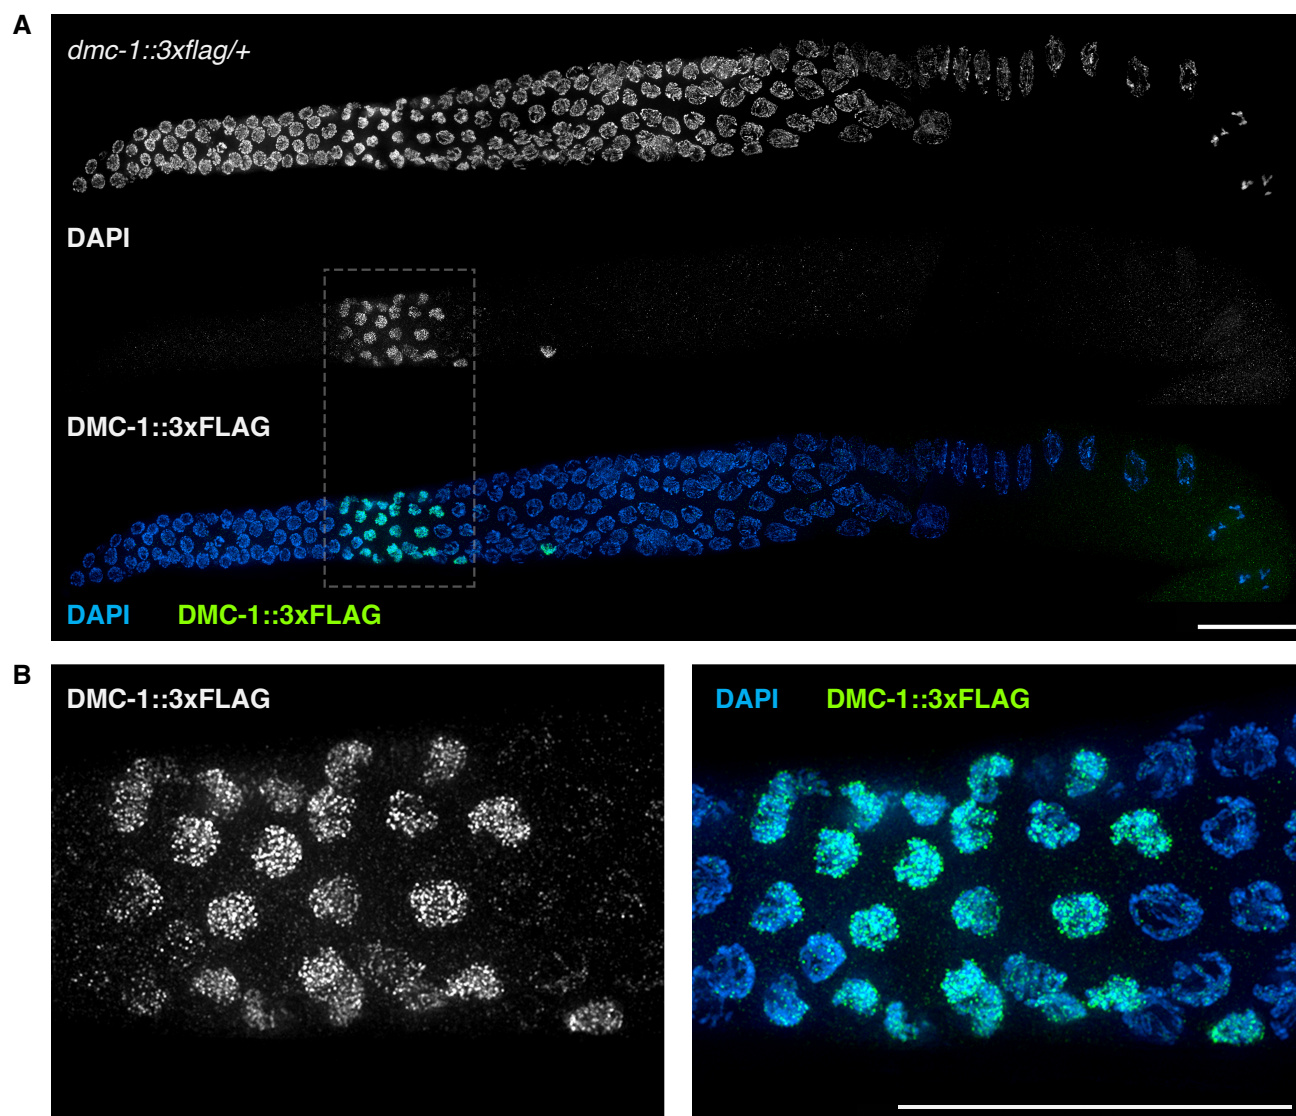

Supplement: supp [file elife-70990-supp-v1.zip]

Figure 1 - figure supplement 5

HOP-2

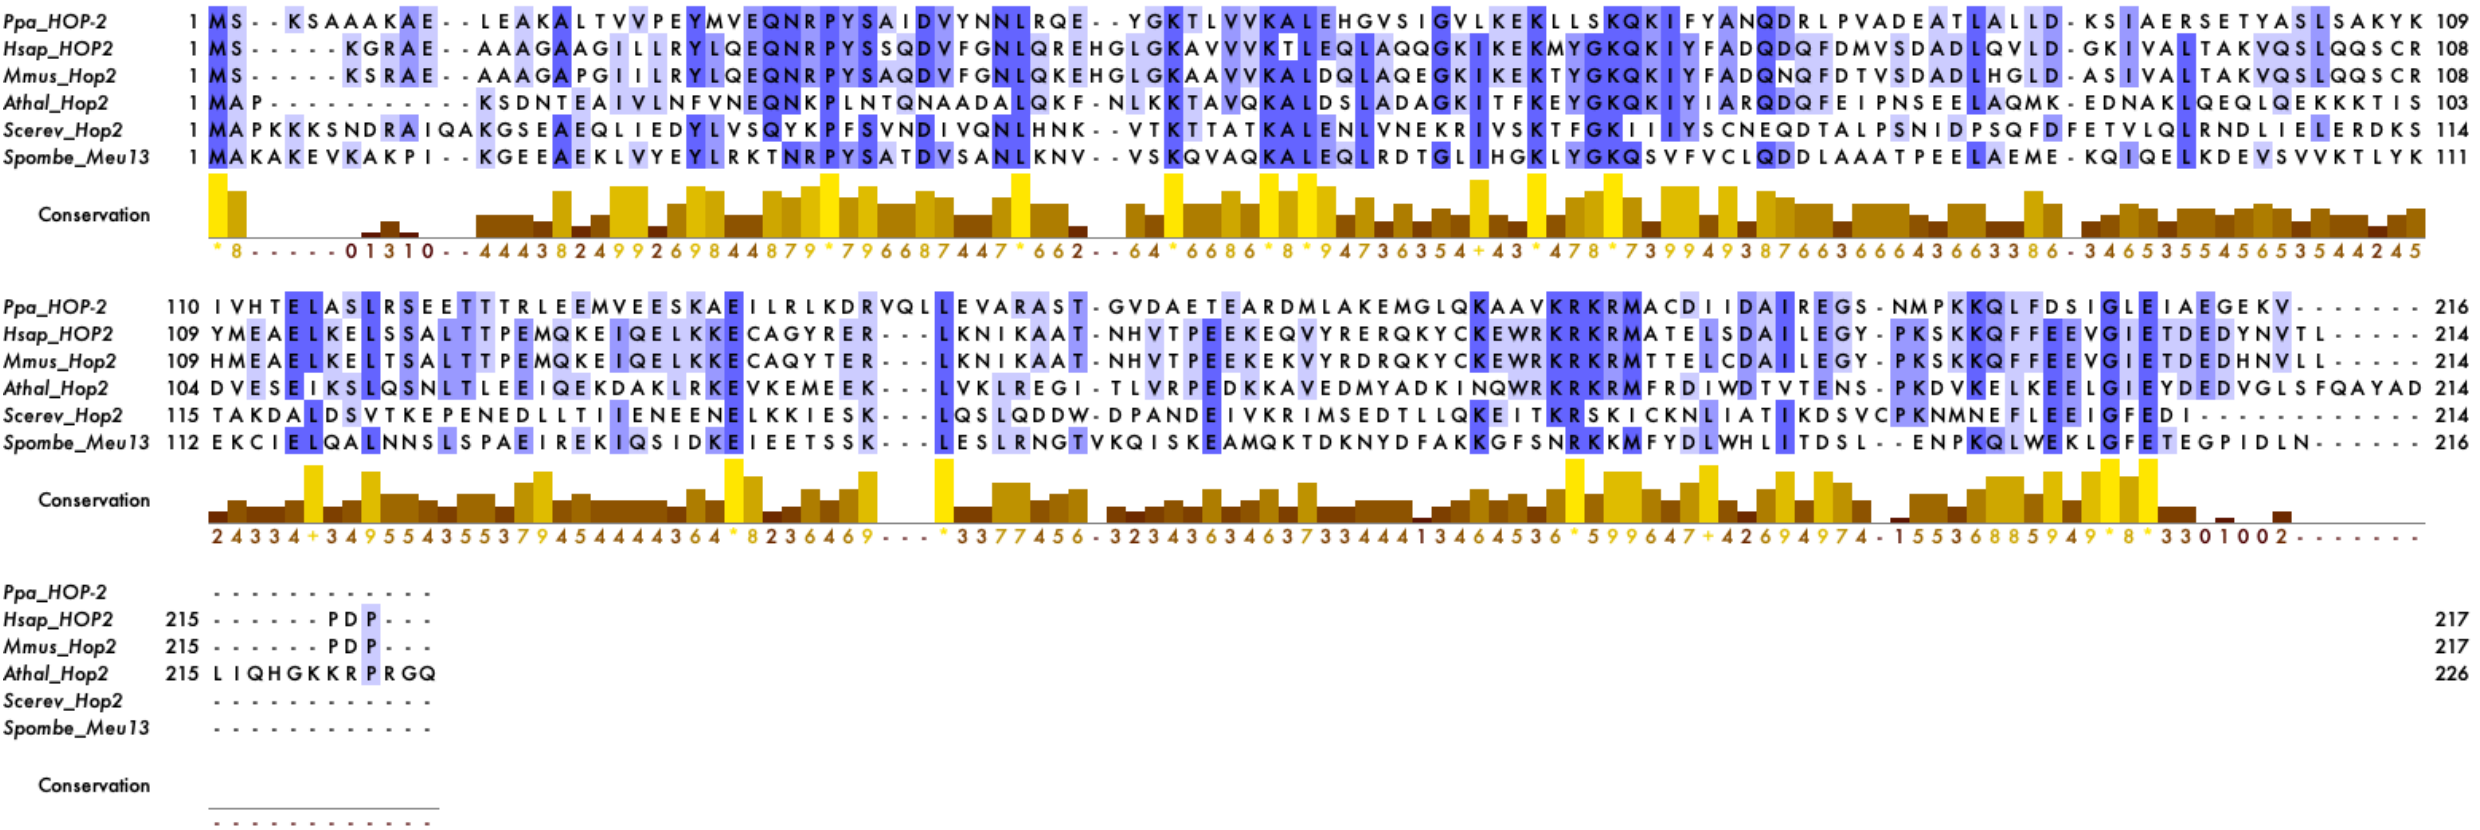

Supplement: supp [file elife-70990-supp-v1.zip]

Figure 1 - figure supplement 7

## SYP-4

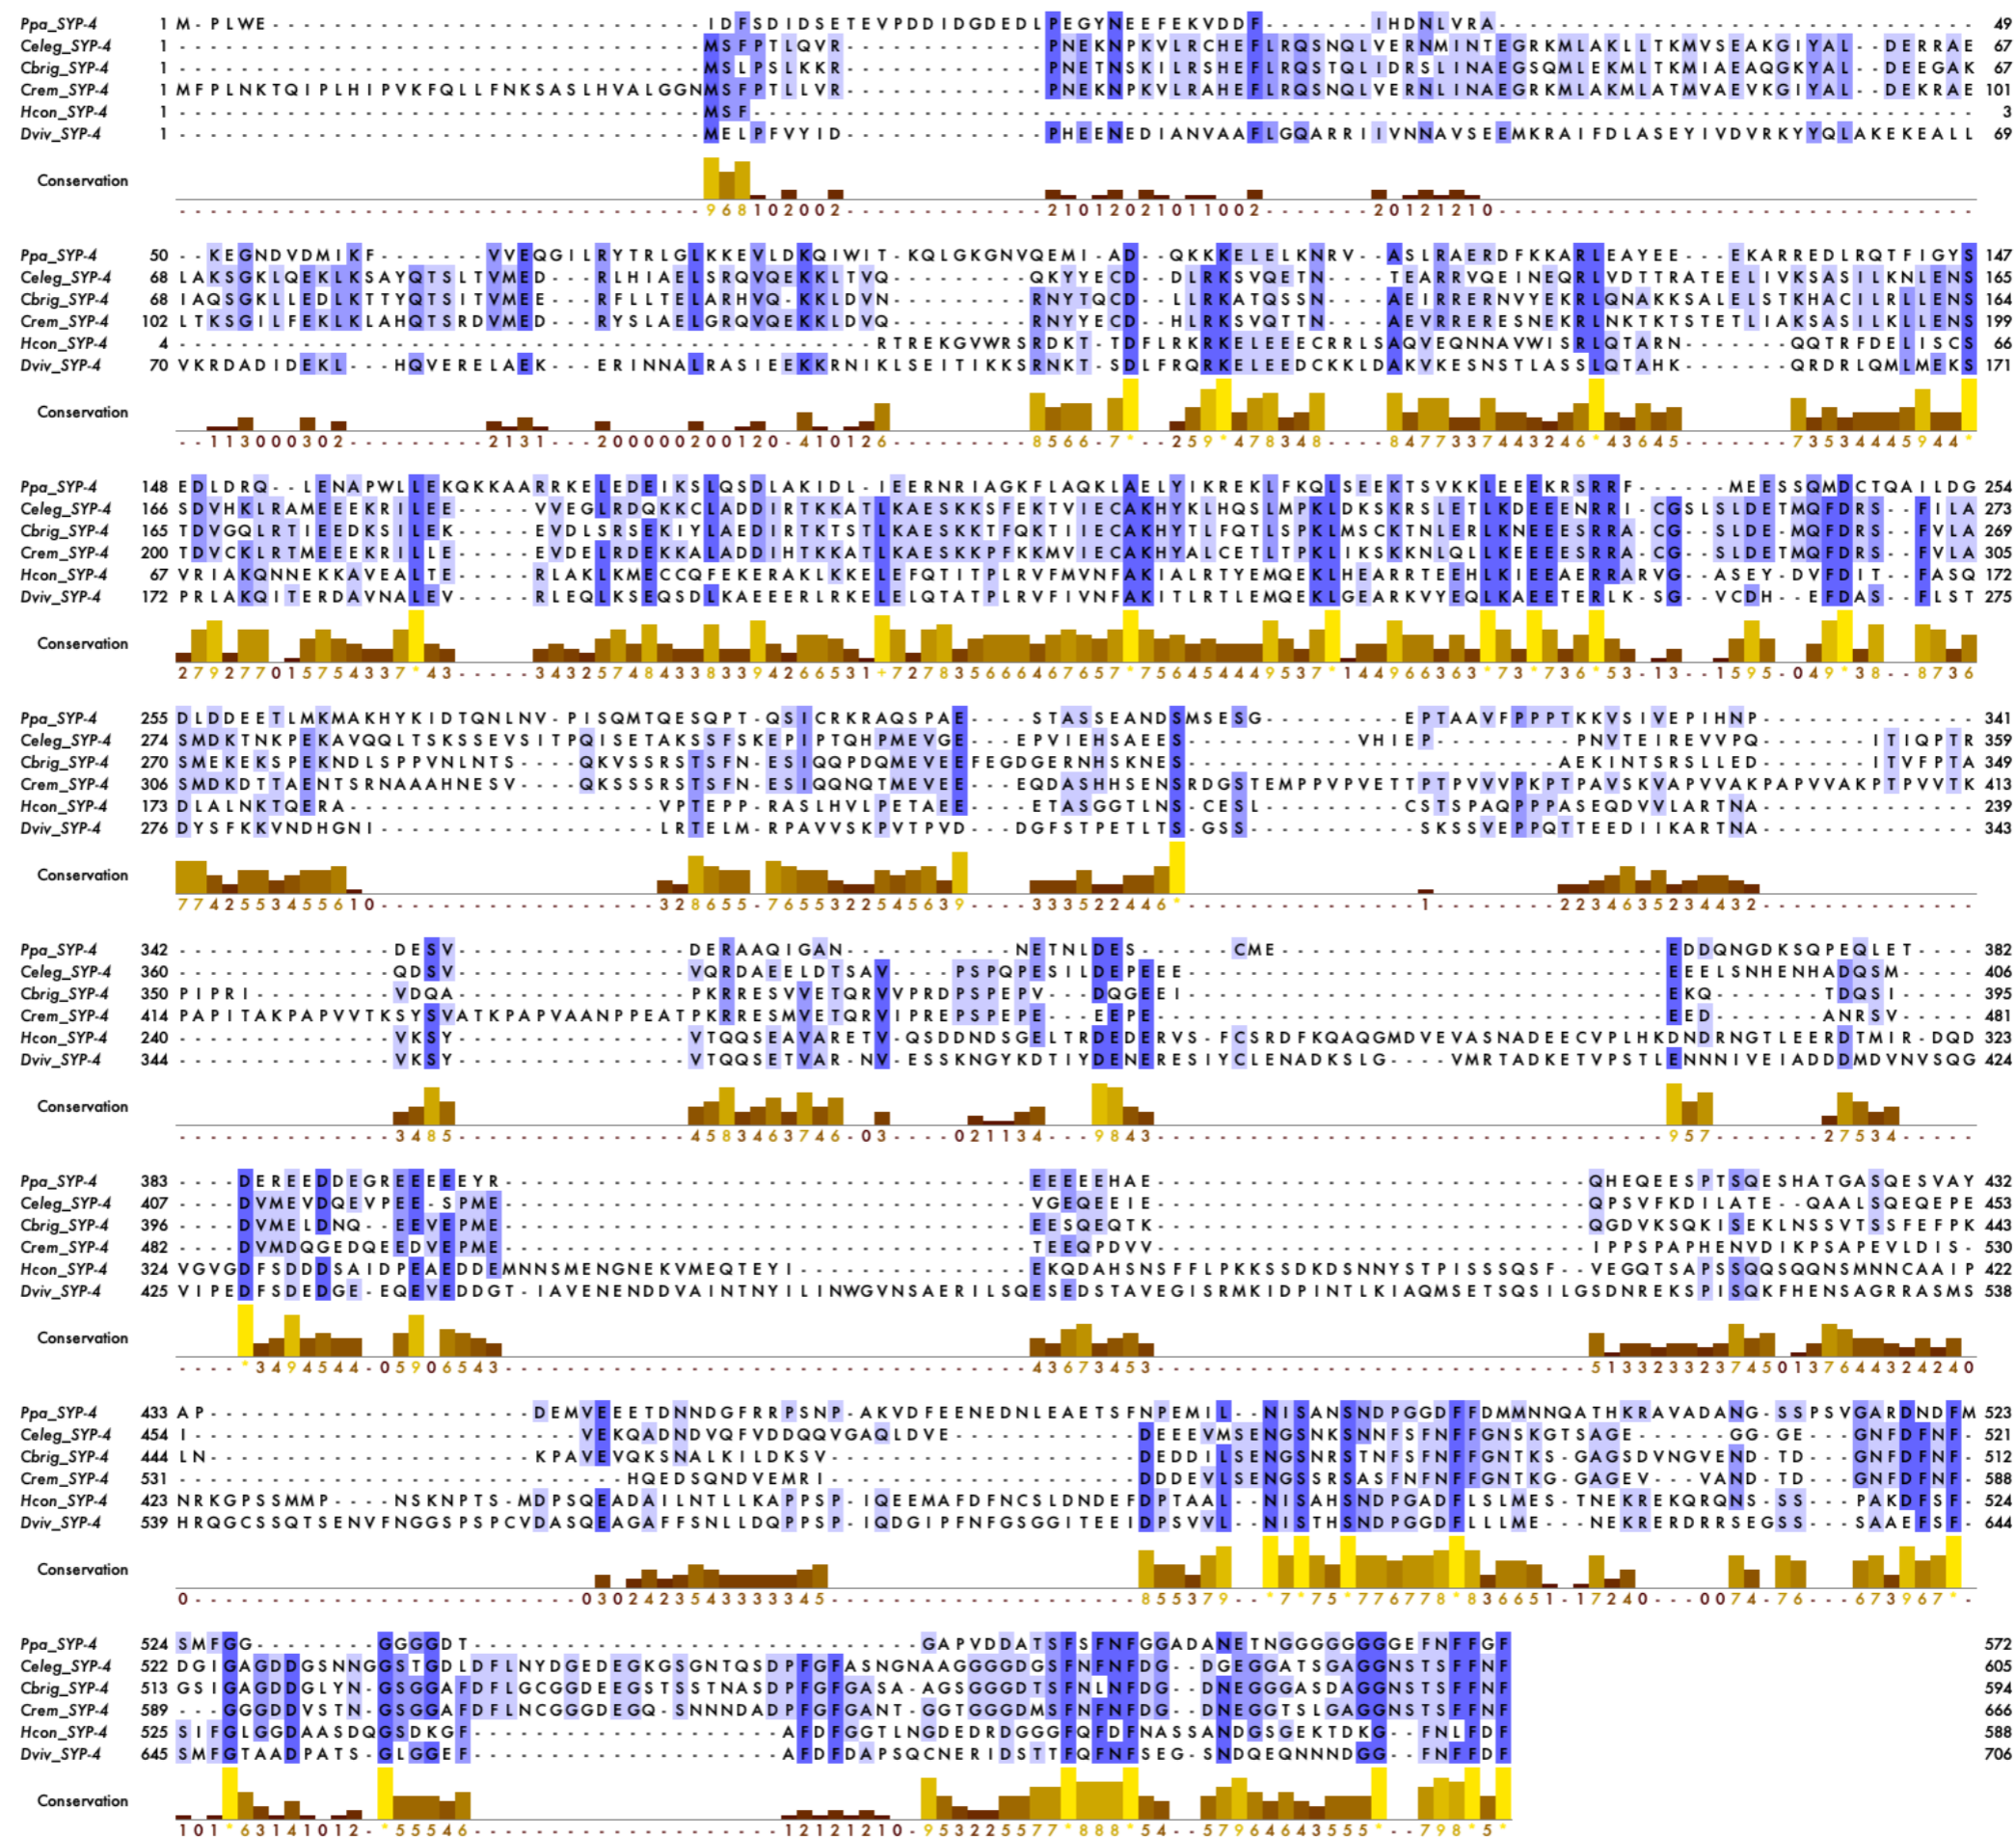

Supplement: supp [file elife-70990-supp-v1.zip]

Figure 1 - figure supplement 6

HOP-1

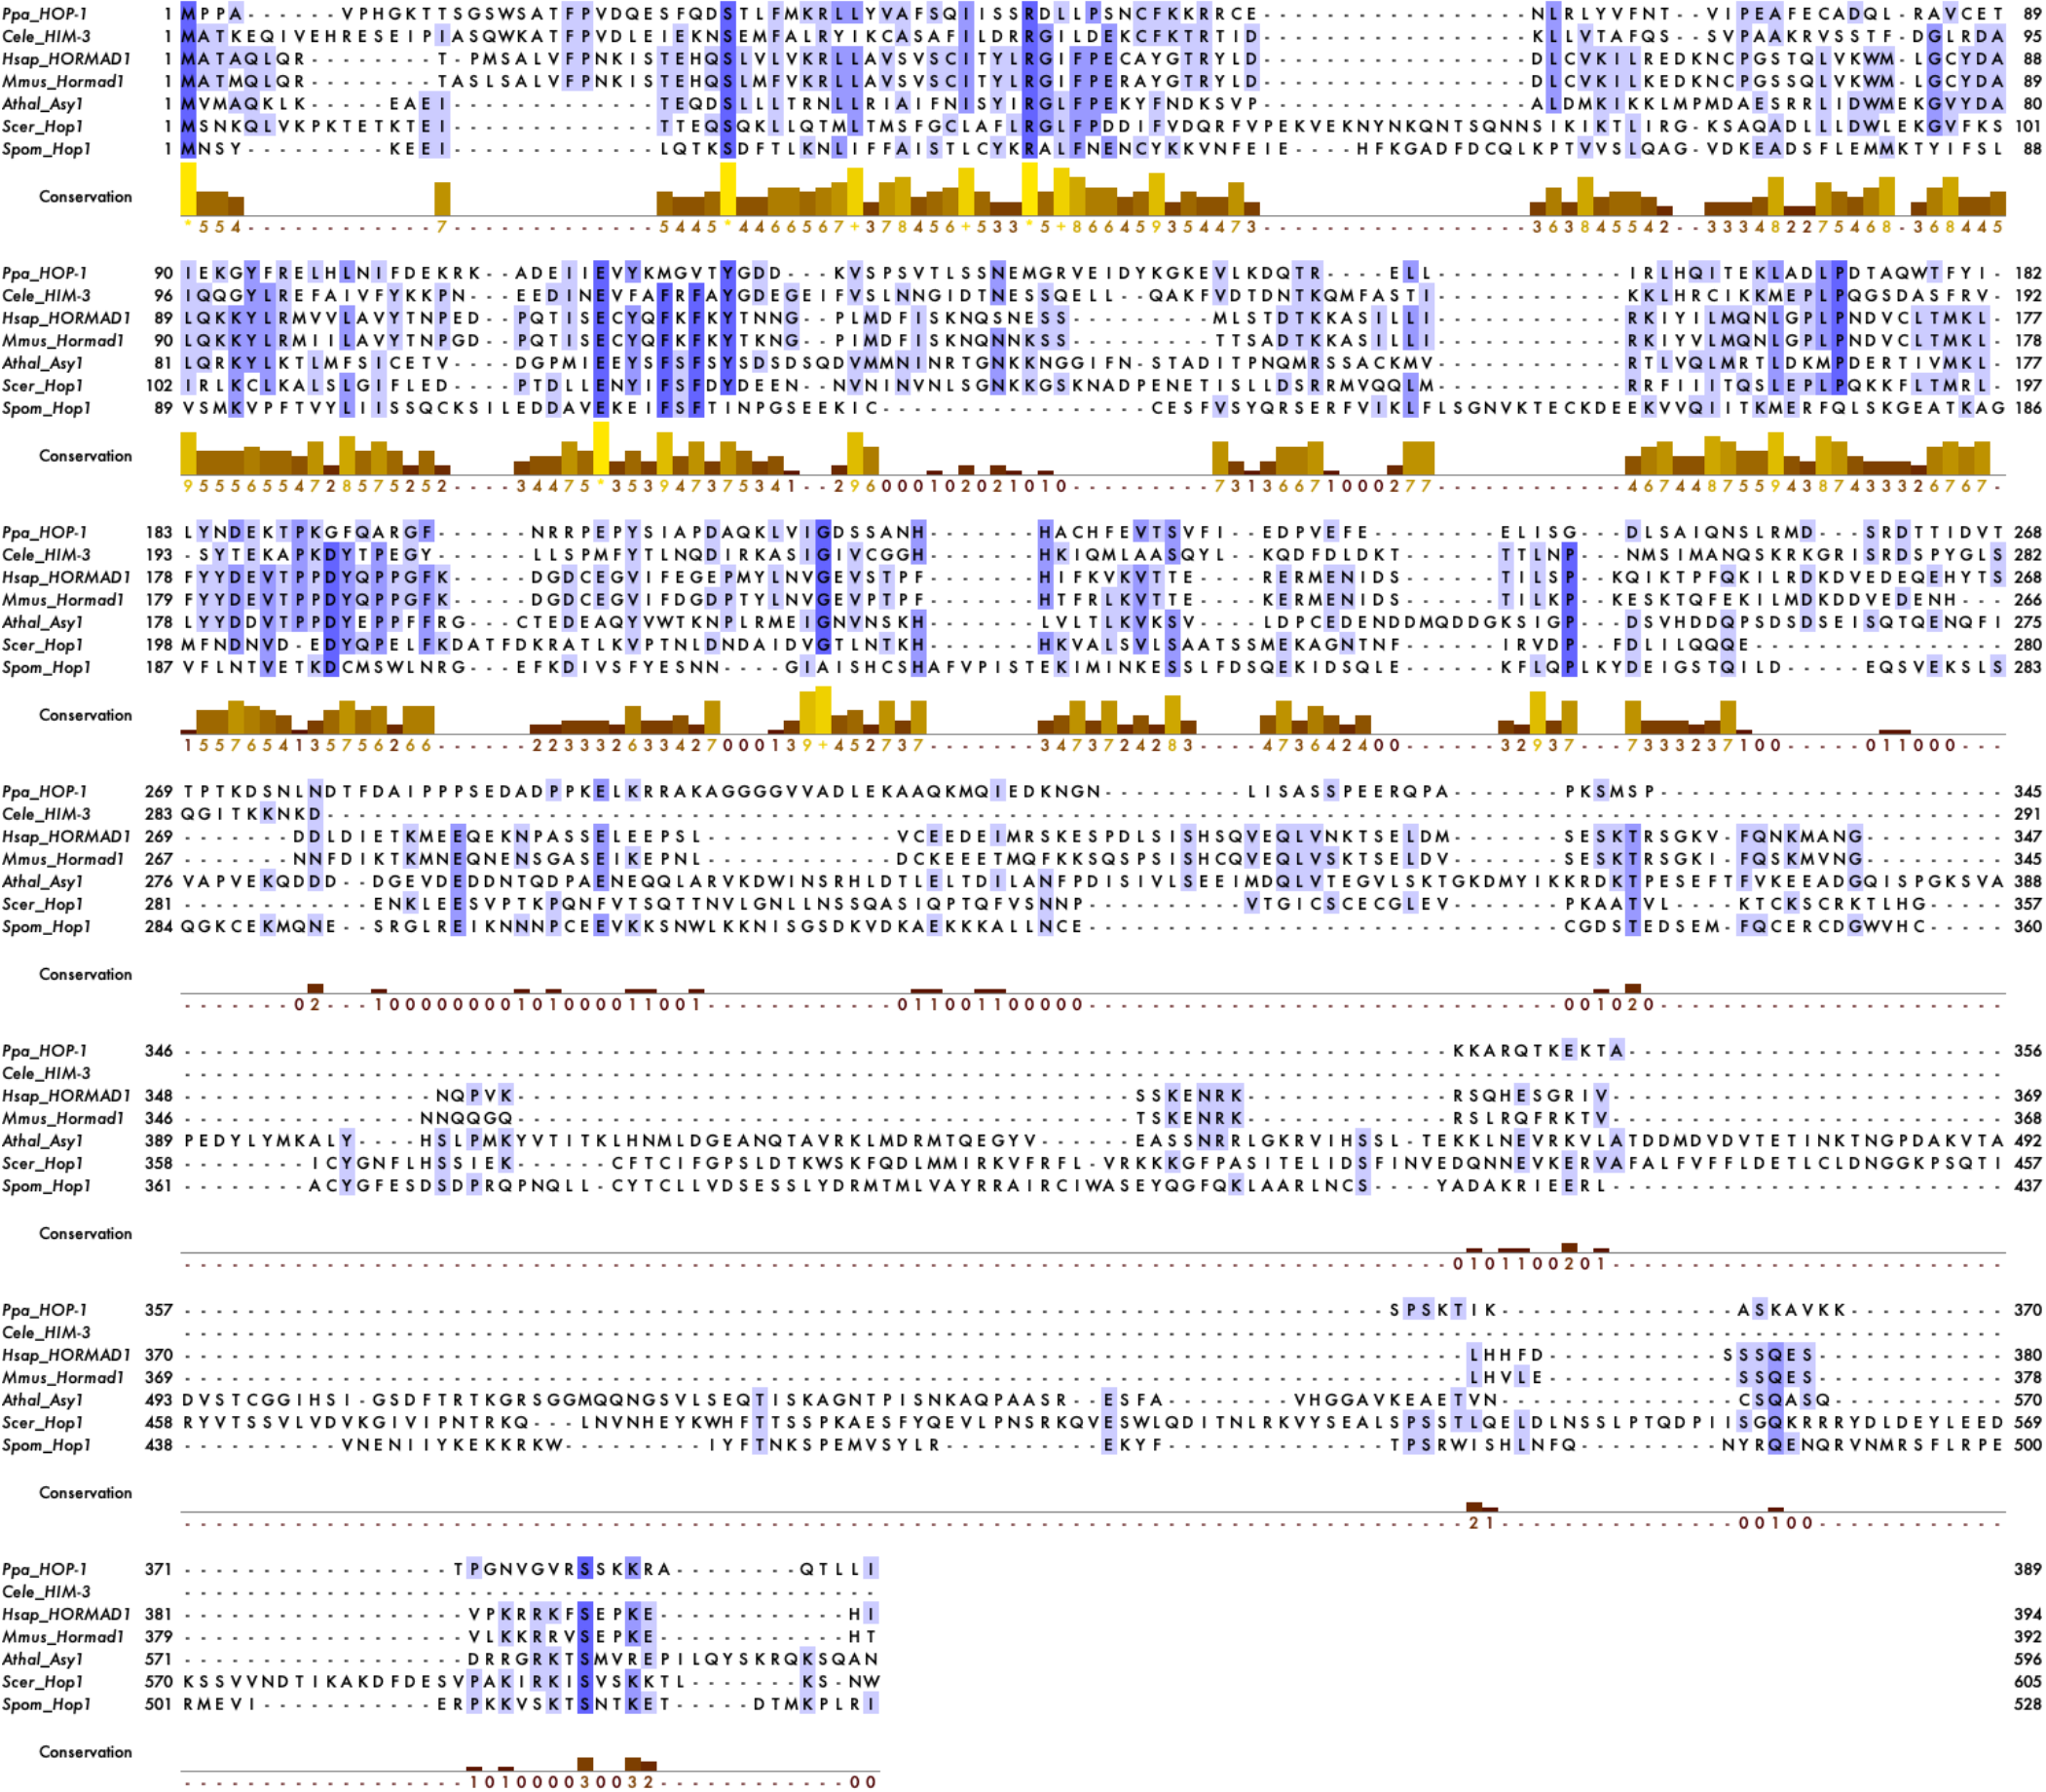

Supplement: supp [file elife-70990-supp-v1.zip]

Figure 2- figure supplement 2

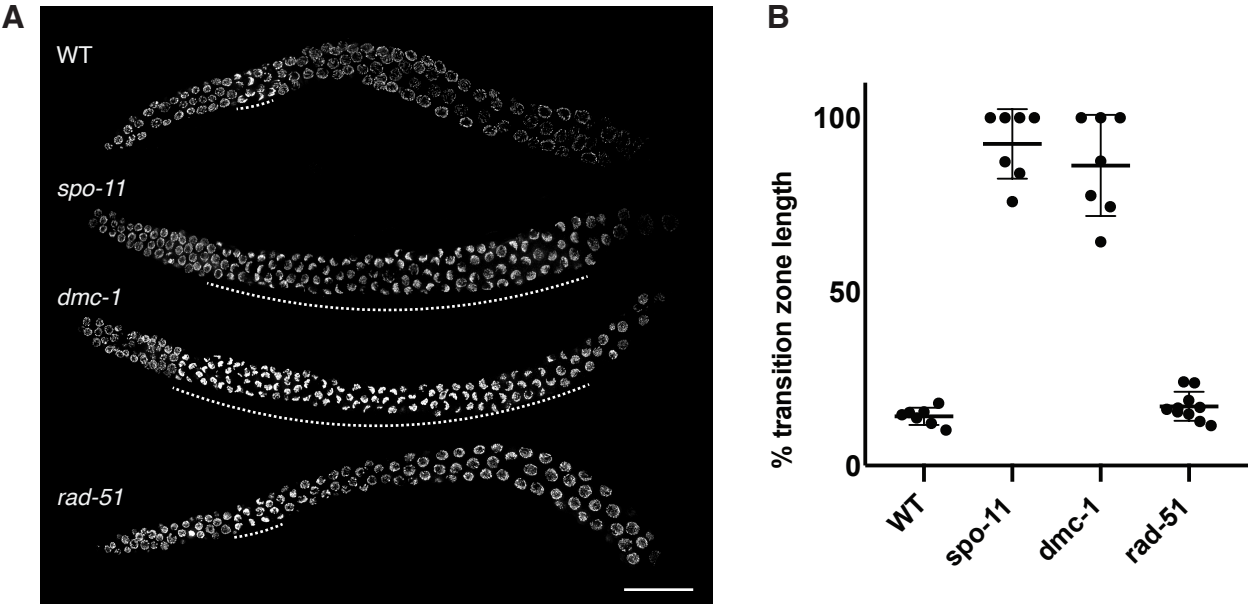

Supplement: supp [file elife-70990-supp-v1.zip]

Figure 4- figure supplement 1

A

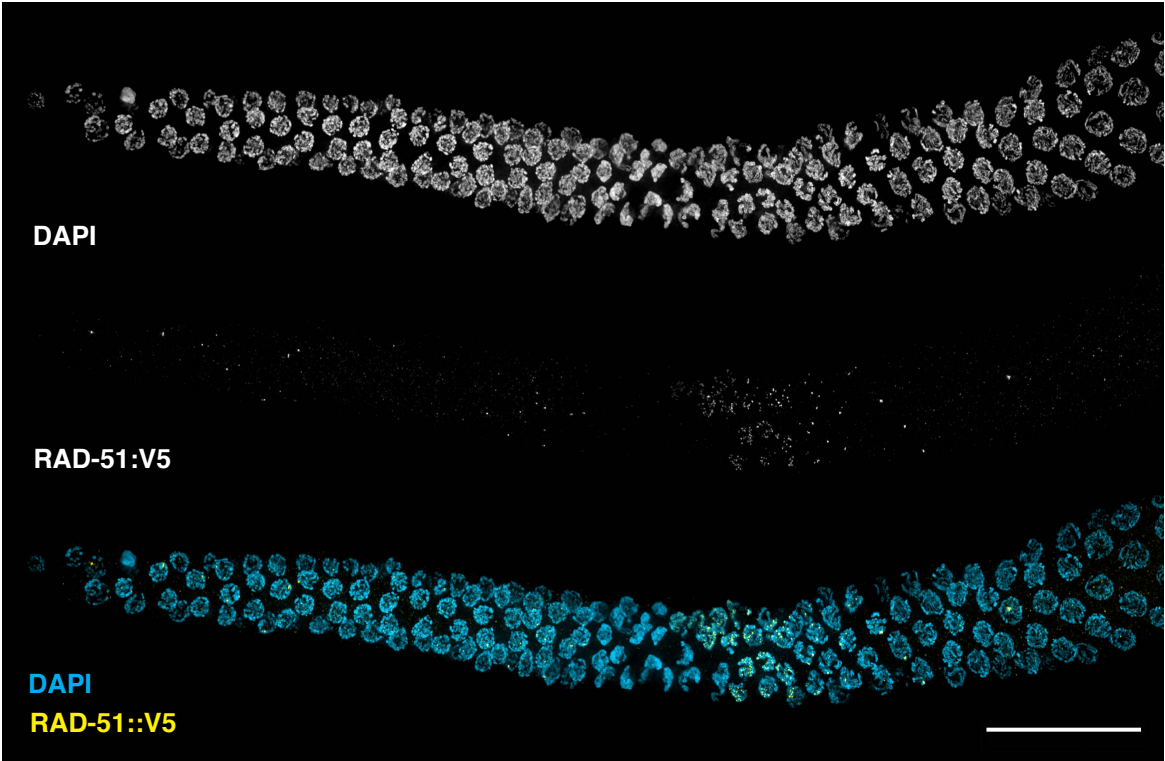

B

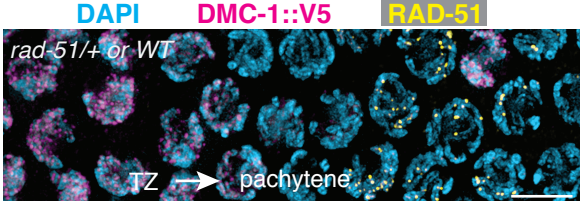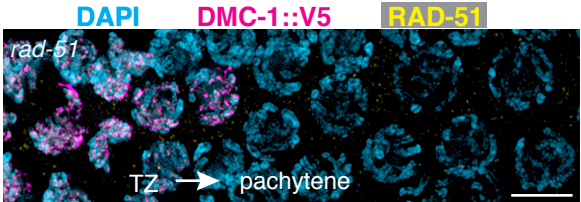

C

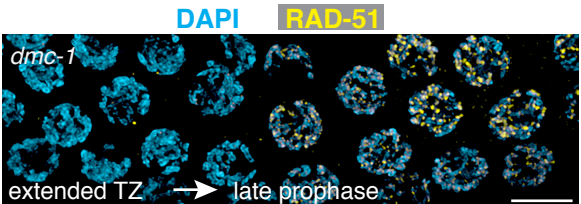

D

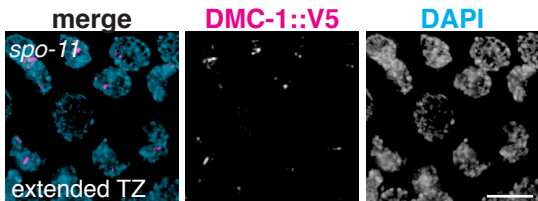

E

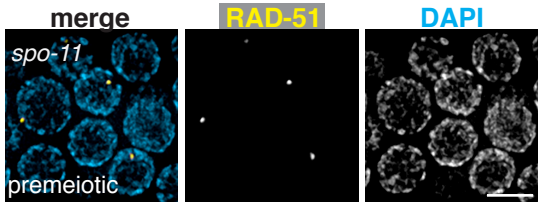

F

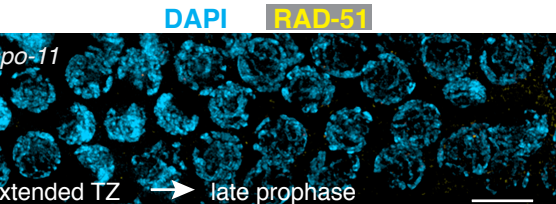

Supplement: supp [file elife-70990-supp-v1.zip]

Figure 2 - figure supplement 1

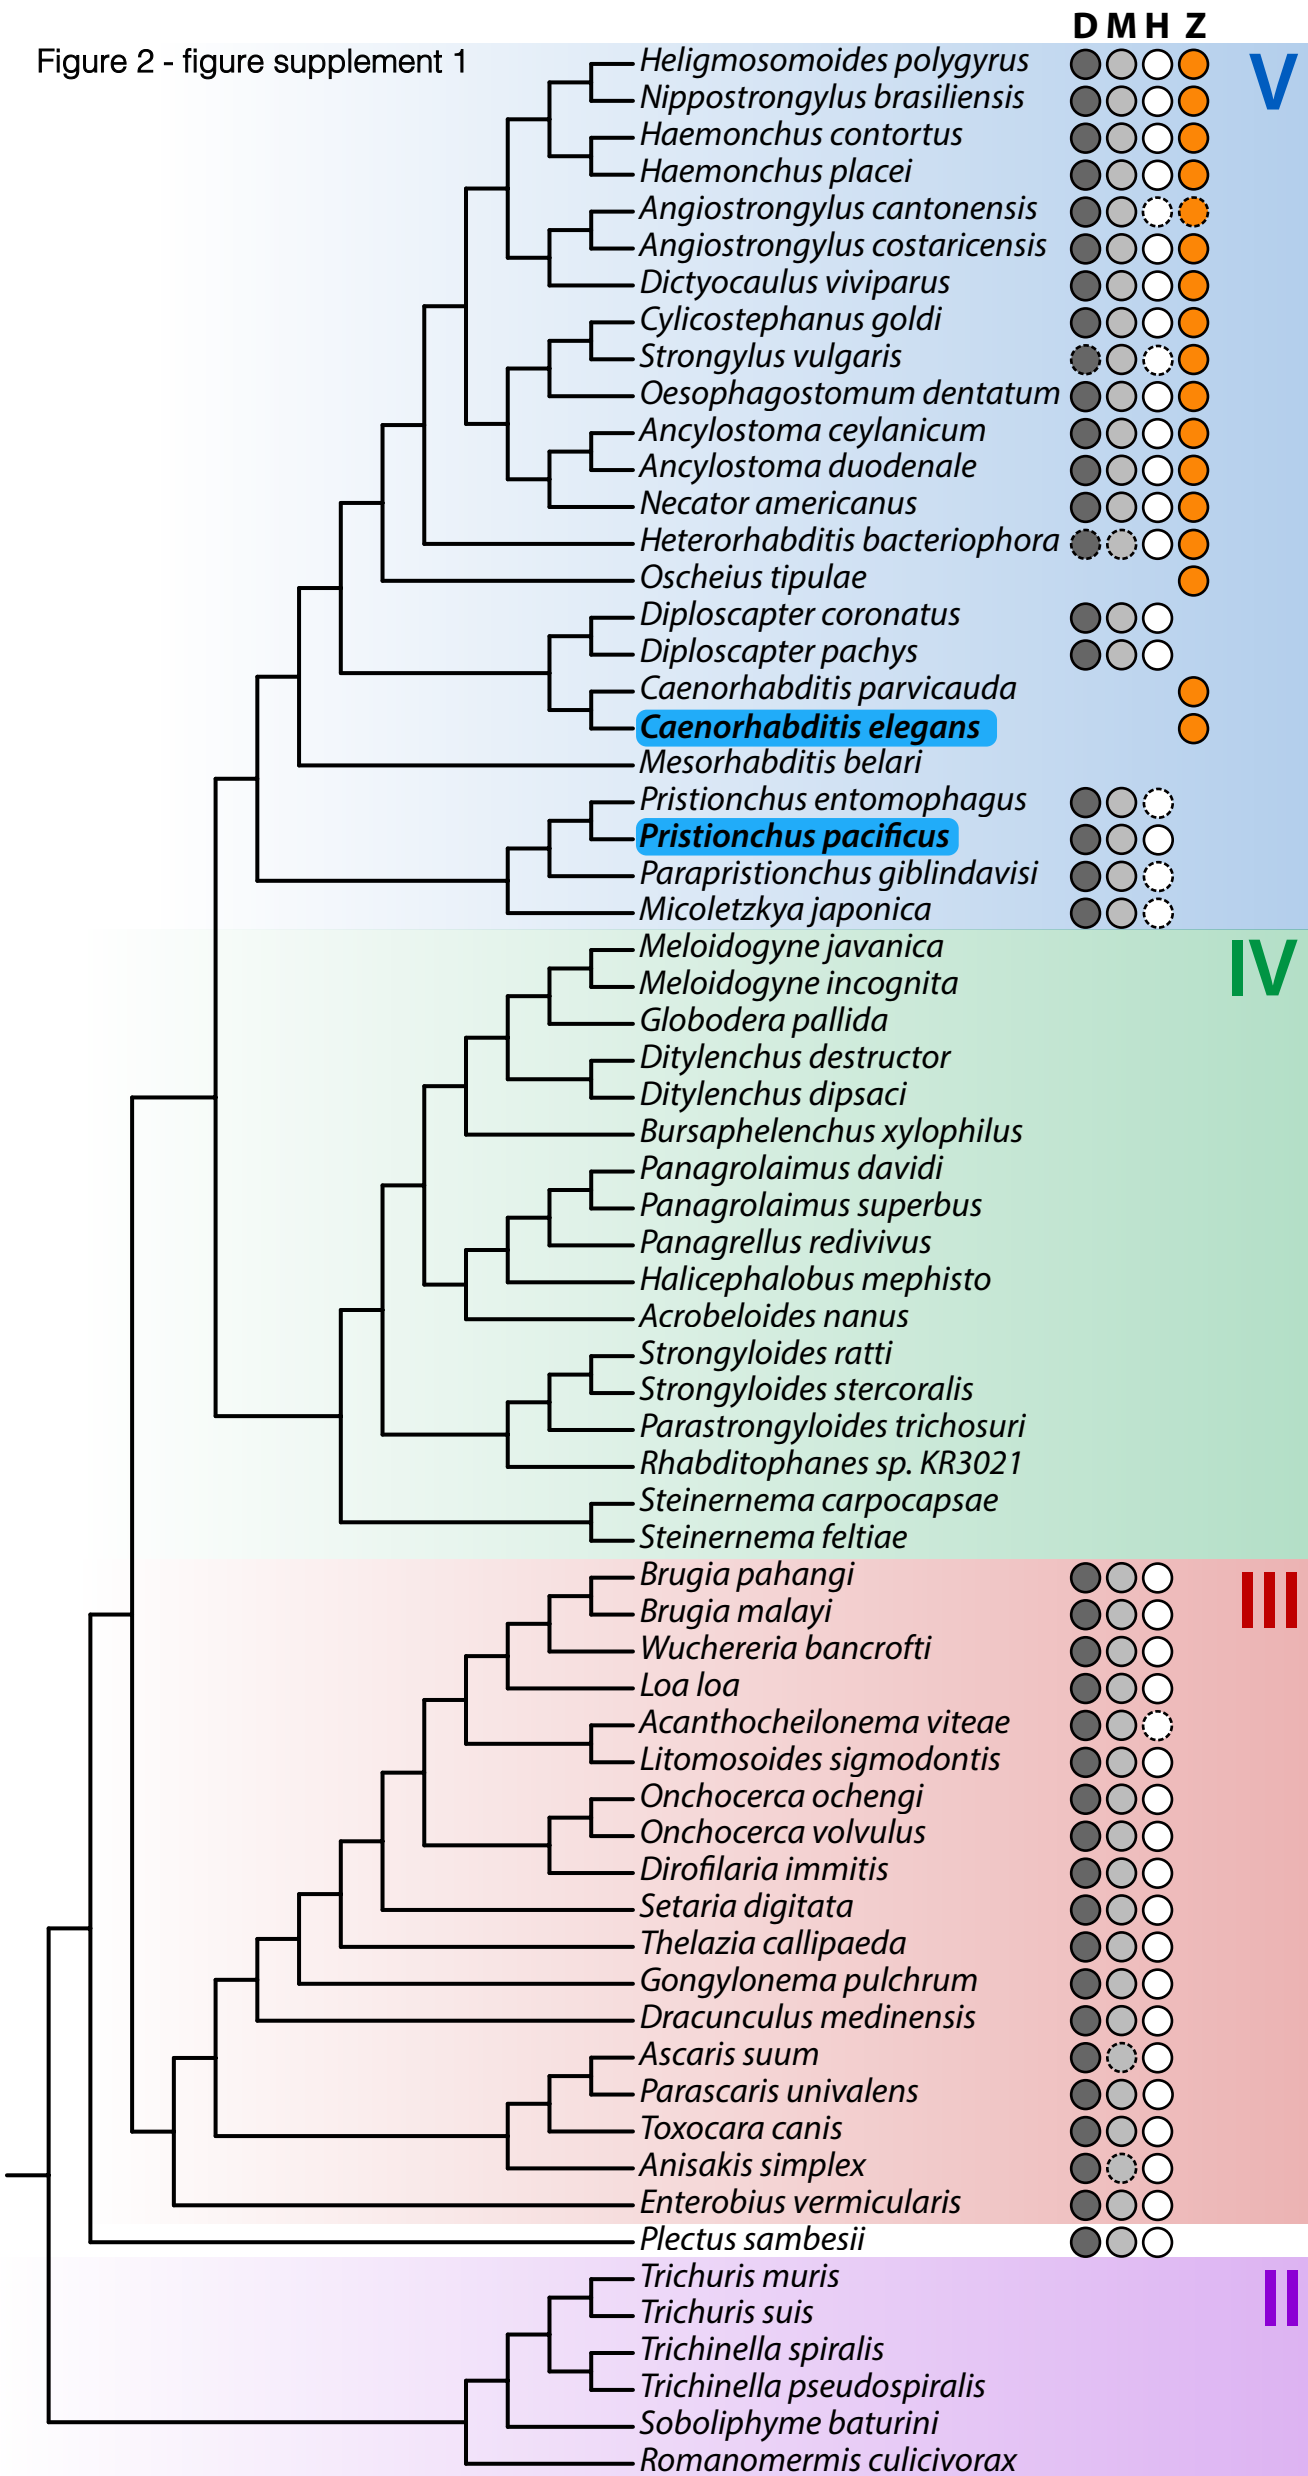

Supplement: supp [file elife-70990-supp-v1.zip]

Figure 1 - figure supplement 2

RAD-51

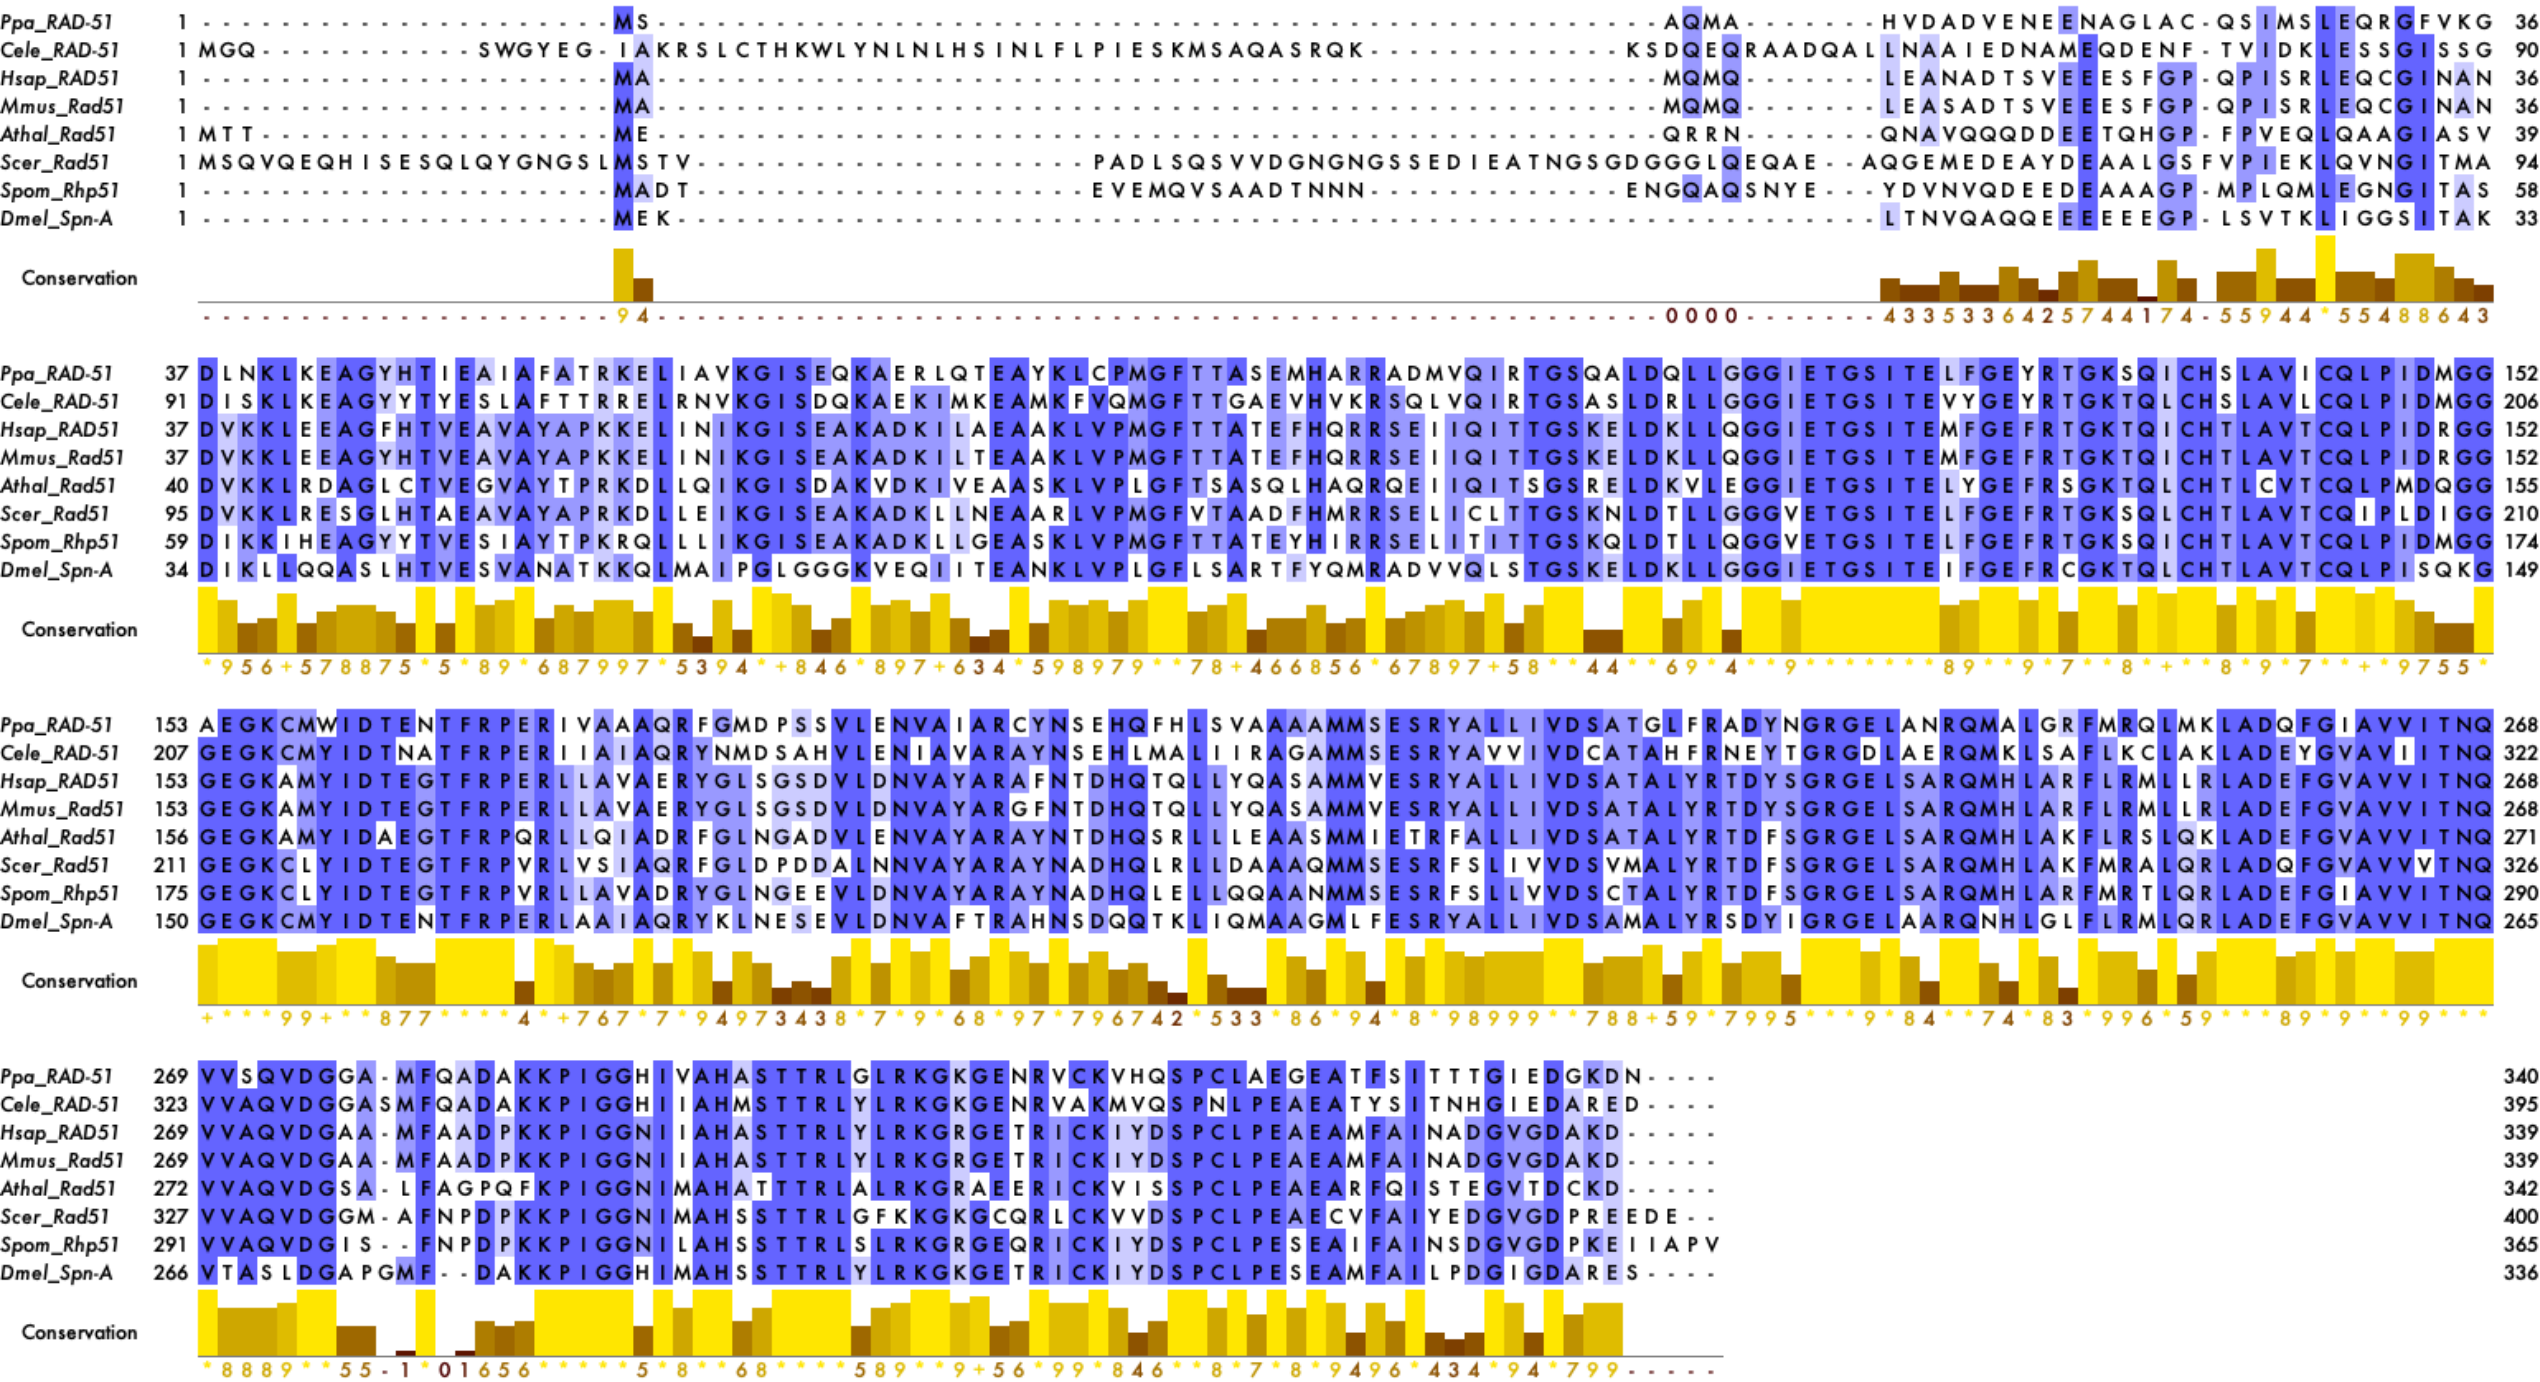

Supplement: supp [file elife-70990-supp-v1.zip]
